# Supplementary material for: Determining the orderliness of carbon materials with nanoparticle imaging and explainable machine learning
Source: Royal Society of Chemistry journal article supplement (doi:10.1039/d4nr00952e), 2024-01-01
Supplement: d4nr00952e1.pdf [file d4nr00952e1.pdf]

## *Supporting information*

# **Determining the orderliness of carbon materials with nanoparticle imaging and explainable machine learning**

Mikhail Yu. Kurbakov<sup>1</sup>

Valentina V. Sulimova<sup>1</sup>

Andrei V. Kopylov<sup>1</sup>

Oleg S. Seredin<sup>1</sup>

Daniil A. Boiko<sup>2</sup>

Alexey S. Galushko<sup>2</sup>

Vera A. Cherepanova<sup>2</sup>

Valentine P. Ananikov<sup>2\*</sup>

## **Contents**

|                                                                                     |     |
|-------------------------------------------------------------------------------------|-----|
| 1. Effect of parameters on the construction of lines.....                           | S2  |
| 2. Values of the interpretable features for SEM-images.....                         | S42 |
| 3. SEM-images visualization in the space of interpreted order features.....         | S62 |
| 4. Synthetic data to demonstrate the work of the proposed approach.....             | S67 |
| 5. Visual representation of separable objects in an explicable features system..... | S77 |
| 6. The orderliness effect on the reaction course.....                               | S78 |

<sup>1</sup> Tula State University, Lenina Ave. 92, Tula, 300012, Russia.

<sup>2</sup> Zelinsky Institute of Organic Chemistry, Russian Academy of Sciences, Leninsky Prospekt 47, Moscow, 119991, Russia; <https://AnanikovLab.ru>

\* Corresponding author: [val@ioc.ac.ru](mailto:val@ioc.ac.ru)

## 1. Effect of parameters on the construction of lines

Figure 1 shows the results of constructing lines for the parameters that were used for data analysis in the article. Parameter values:  $k = 3$ ;  $w_d = 1.5$ ;  $s = 8$ ;  $C = 0.025$ ;

$$w_{coax} = 1.75; L_{min} = 12.$$

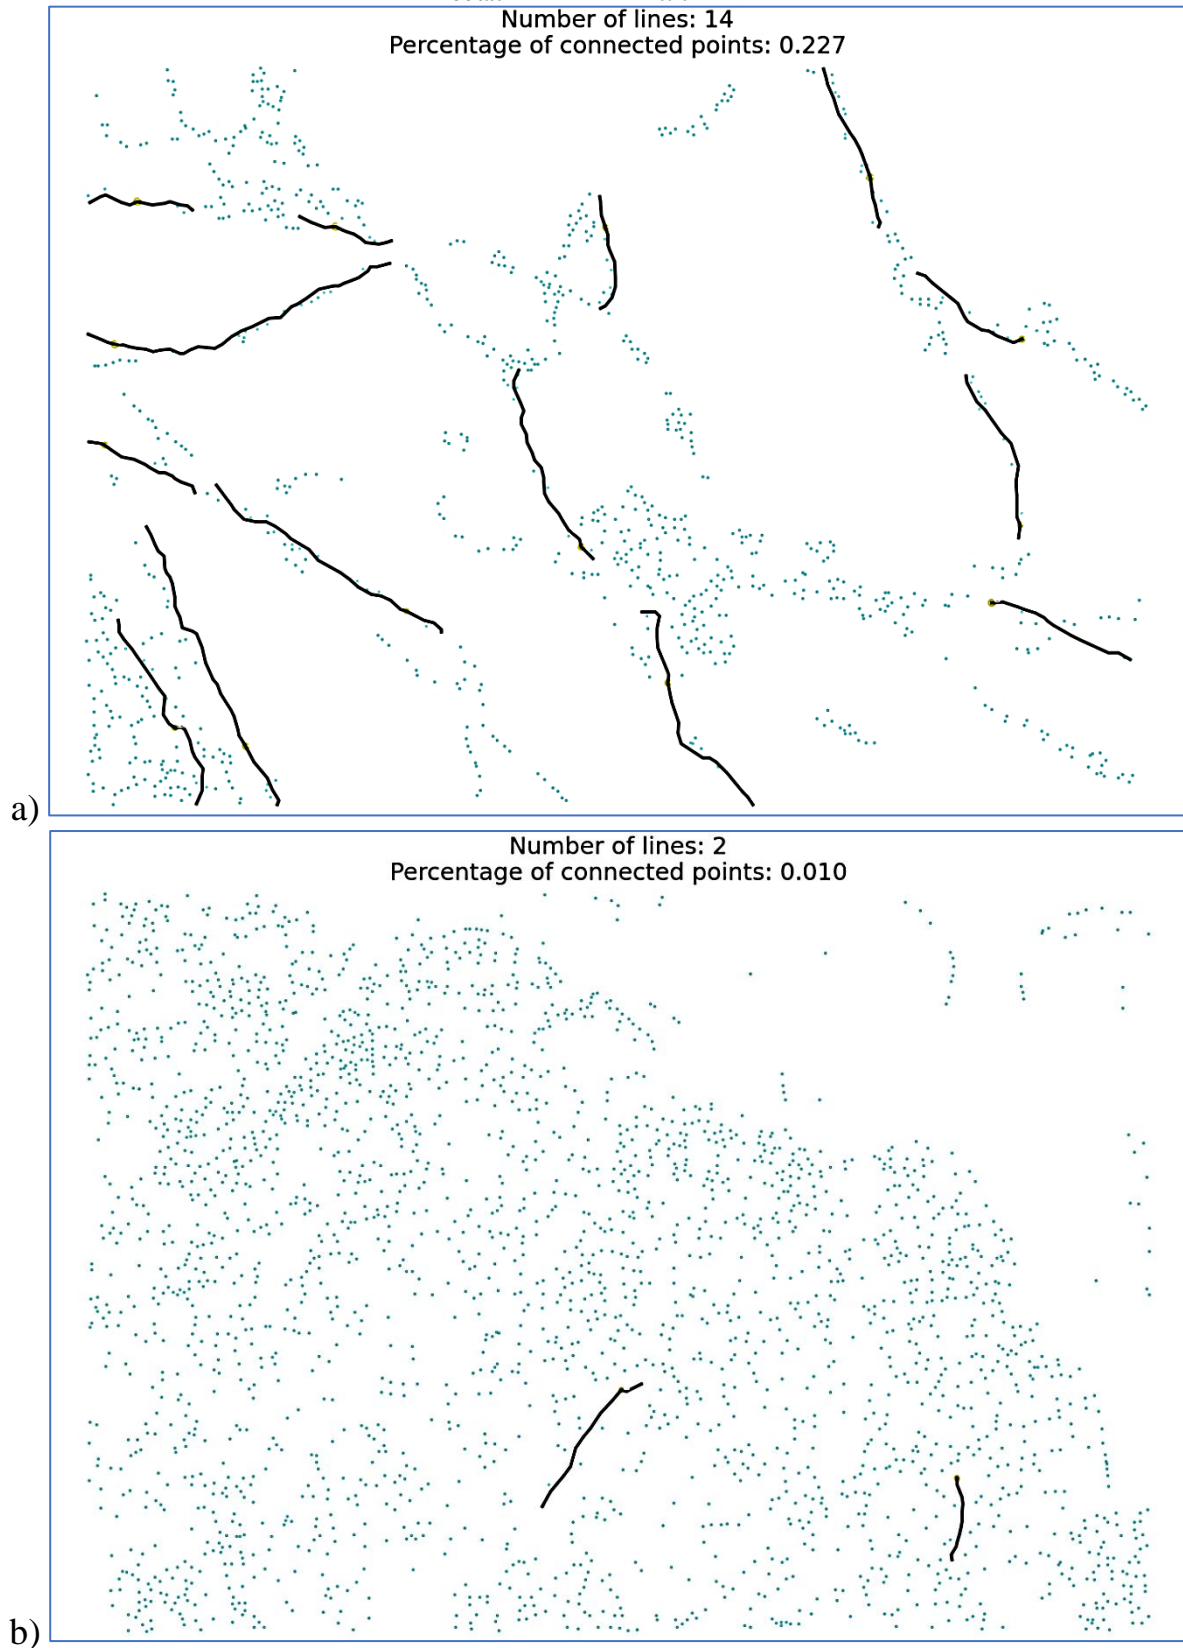

Figure 1 – Results of constructing lines with various approach parameters. The arrangement of the particles in the SEM image: a) ordered (S1-42); b) disordered (S3-157)

Figure 2 shows the results of constructing lines for the proportionality coefficient for early stopping in local groups formation  $k = 1$ . The other parameters are unchanged.

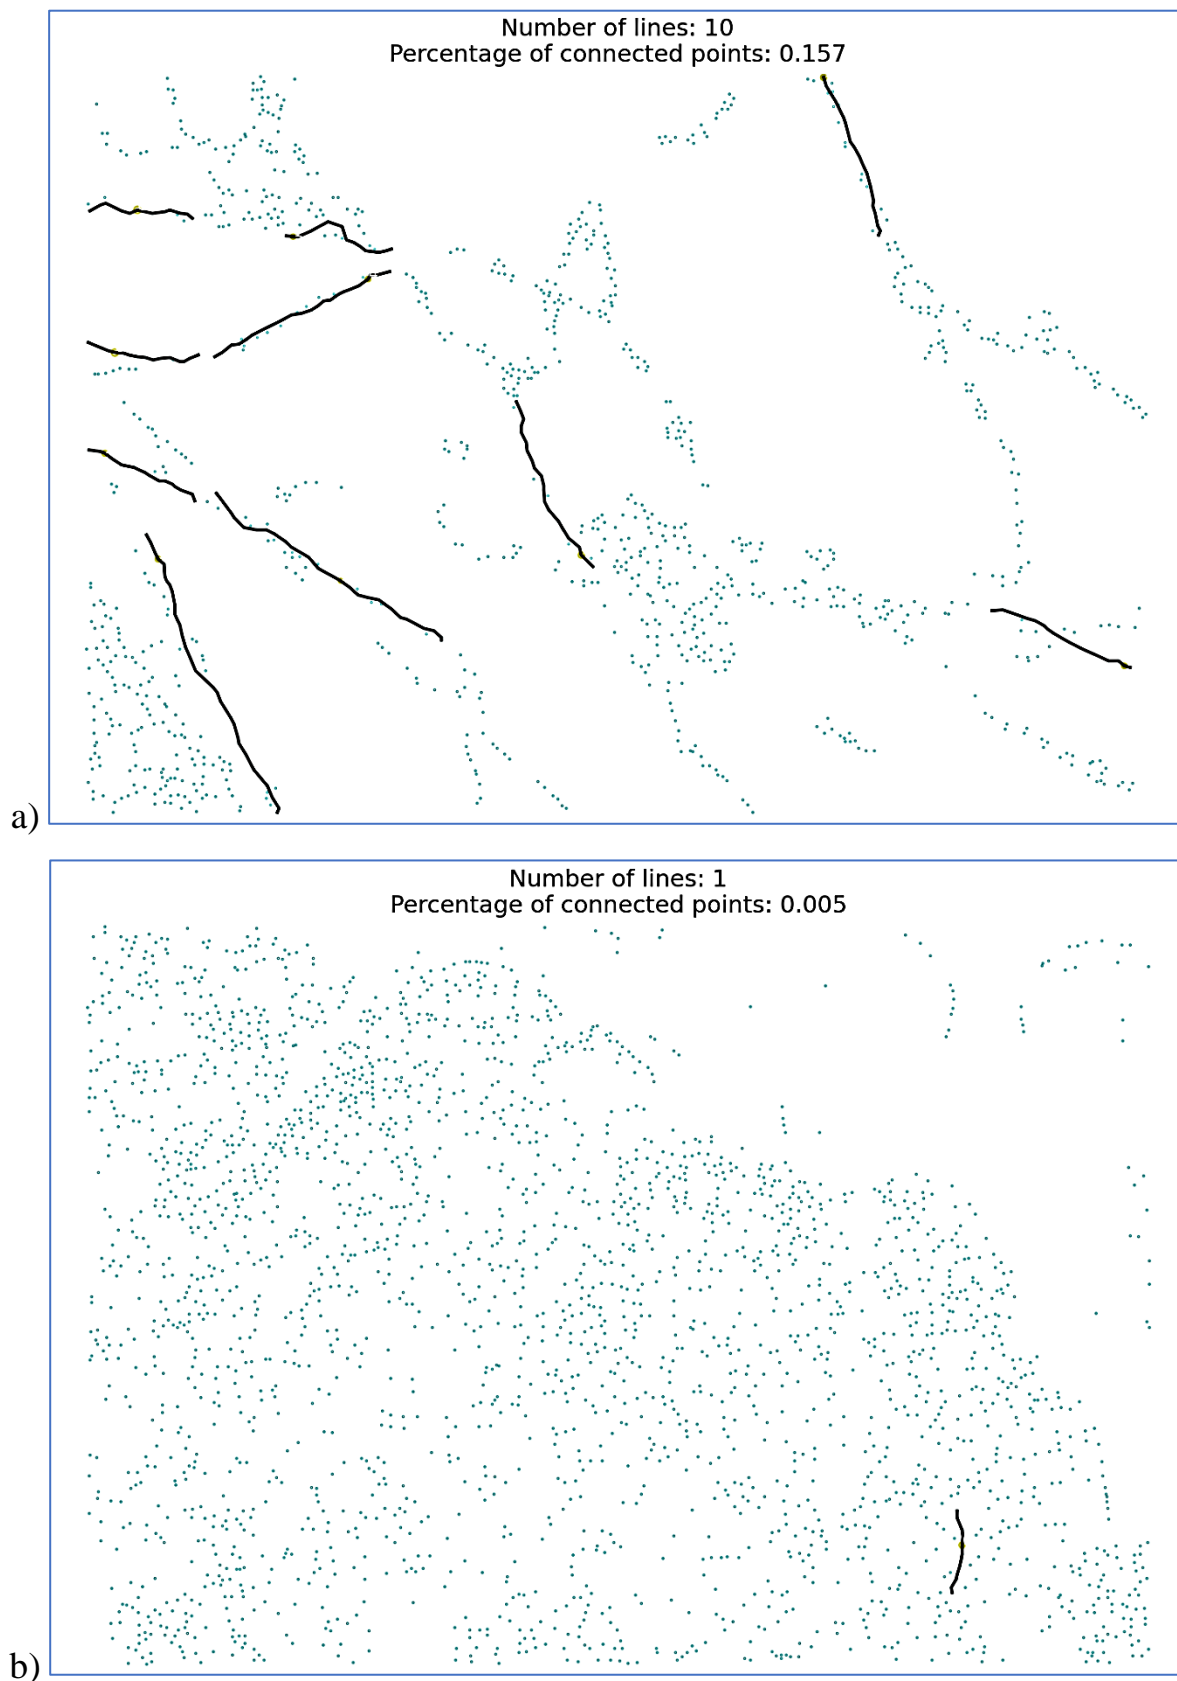

Figure 2 – Results of constructing lines for the proportionality coefficient for early stopping in local groups formation  $k = 1$ . The arrangement of the particles in the SEM image:  
a) ordered (S1-42); b) disordered (S3-157)

Figure 3 shows the results of constructing lines for the proportionality coefficient for early stopping in local groups formation  $k = 2$ . The other parameters are unchanged.

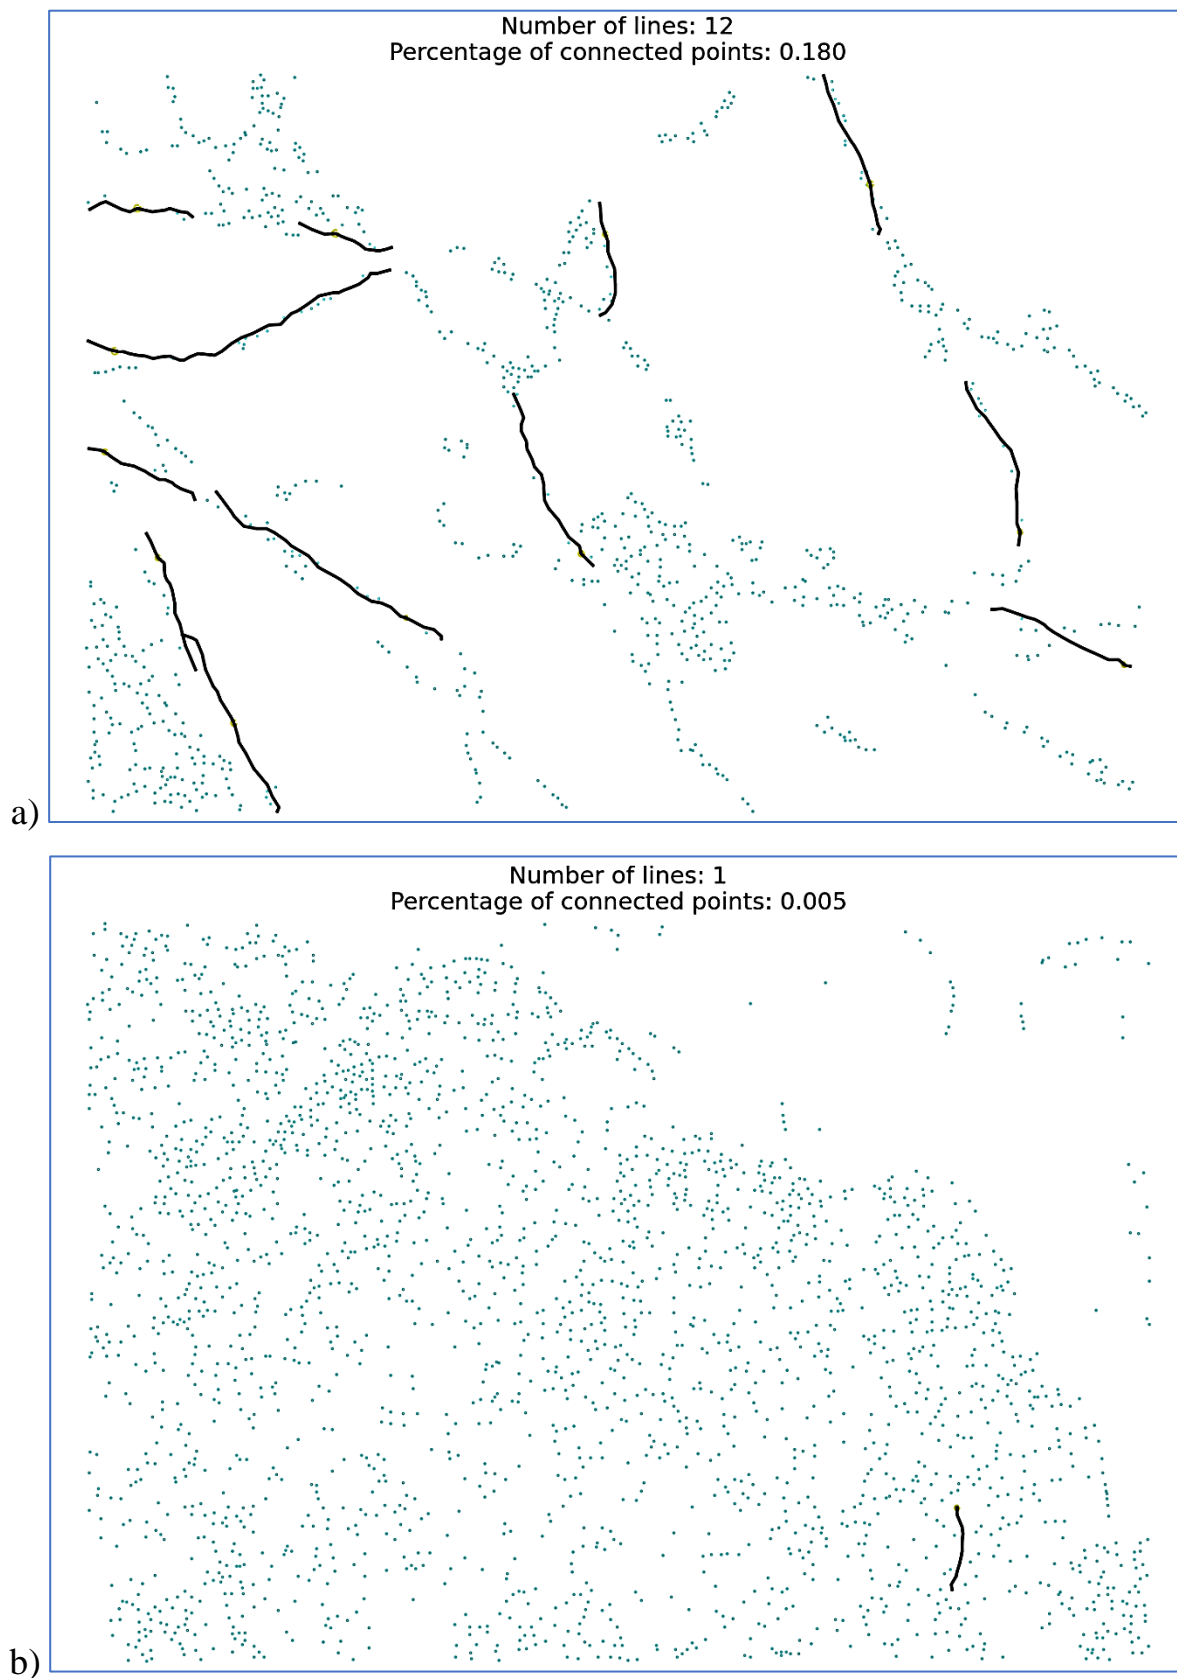

Figure 3 – Results of constructing lines for the proportionality coefficient for early stopping in local groups formation  $k = 2$ . The arrangement of the particles in the SEM image:  
a) ordered (S1-42); b) disordered (S3-157)



Figure 4 shows the results of constructing lines for the proportionality coefficient for early stopping in local groups formation  $k = 4$ . The other parameters are unchanged.

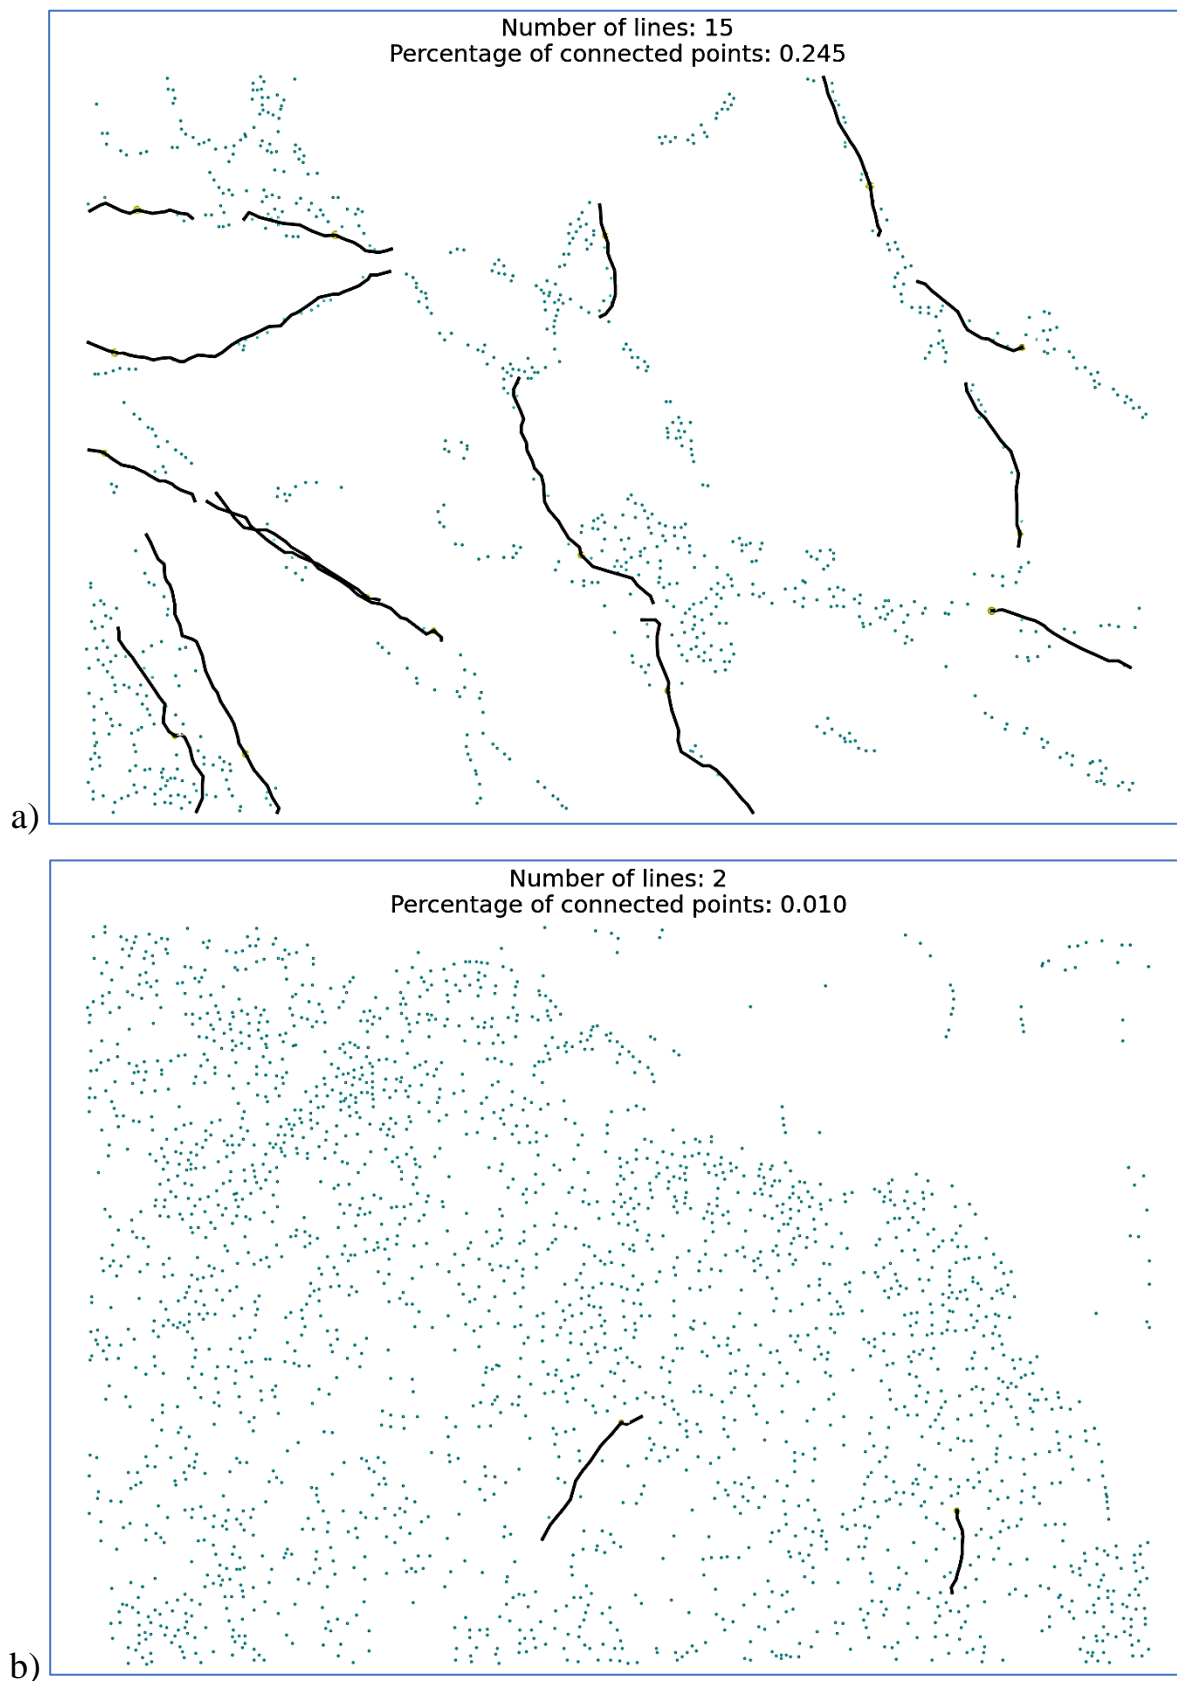

Figure 4 – Results of constructing lines for the proportionality coefficient for early stopping in local groups formation  $k = 4$ . The arrangement of the particles in the SEM image:  
a) ordered (S1-42); b) disordered (S3-157)

Figure 5 shows the results of constructing lines for the proportionality coefficient for early stopping in local groups formation  $k = 5$ . The other parameters are unchanged.

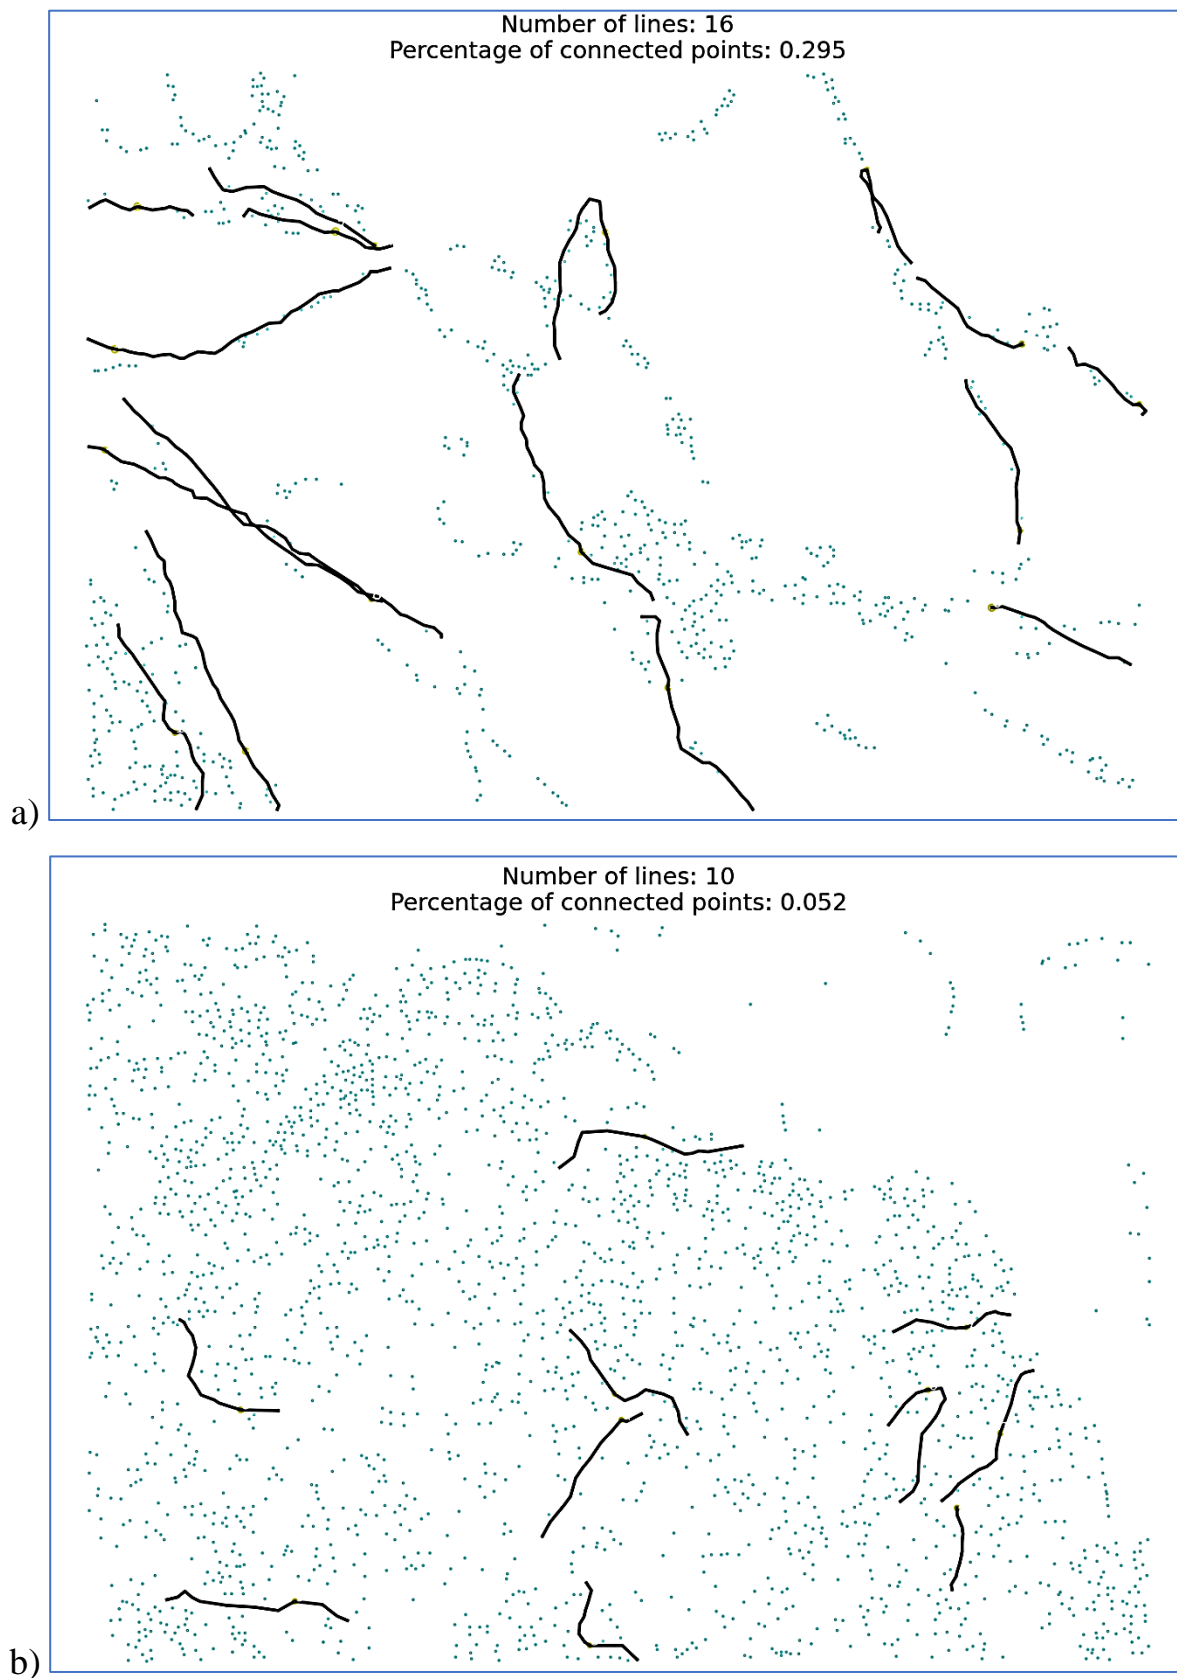

Figure 5 – Results of constructing lines for the proportionality coefficient for early stopping in local groups formation  $k = 5$ . The arrangement of the particles in the SEM image:  
a) ordered (S1-42); b) disordered (S3-157)

Figure 6 shows the results of constructing lines for the proportionality coefficient for early stopping in local groups formation  $k = 6$ . The other parameters are unchanged.

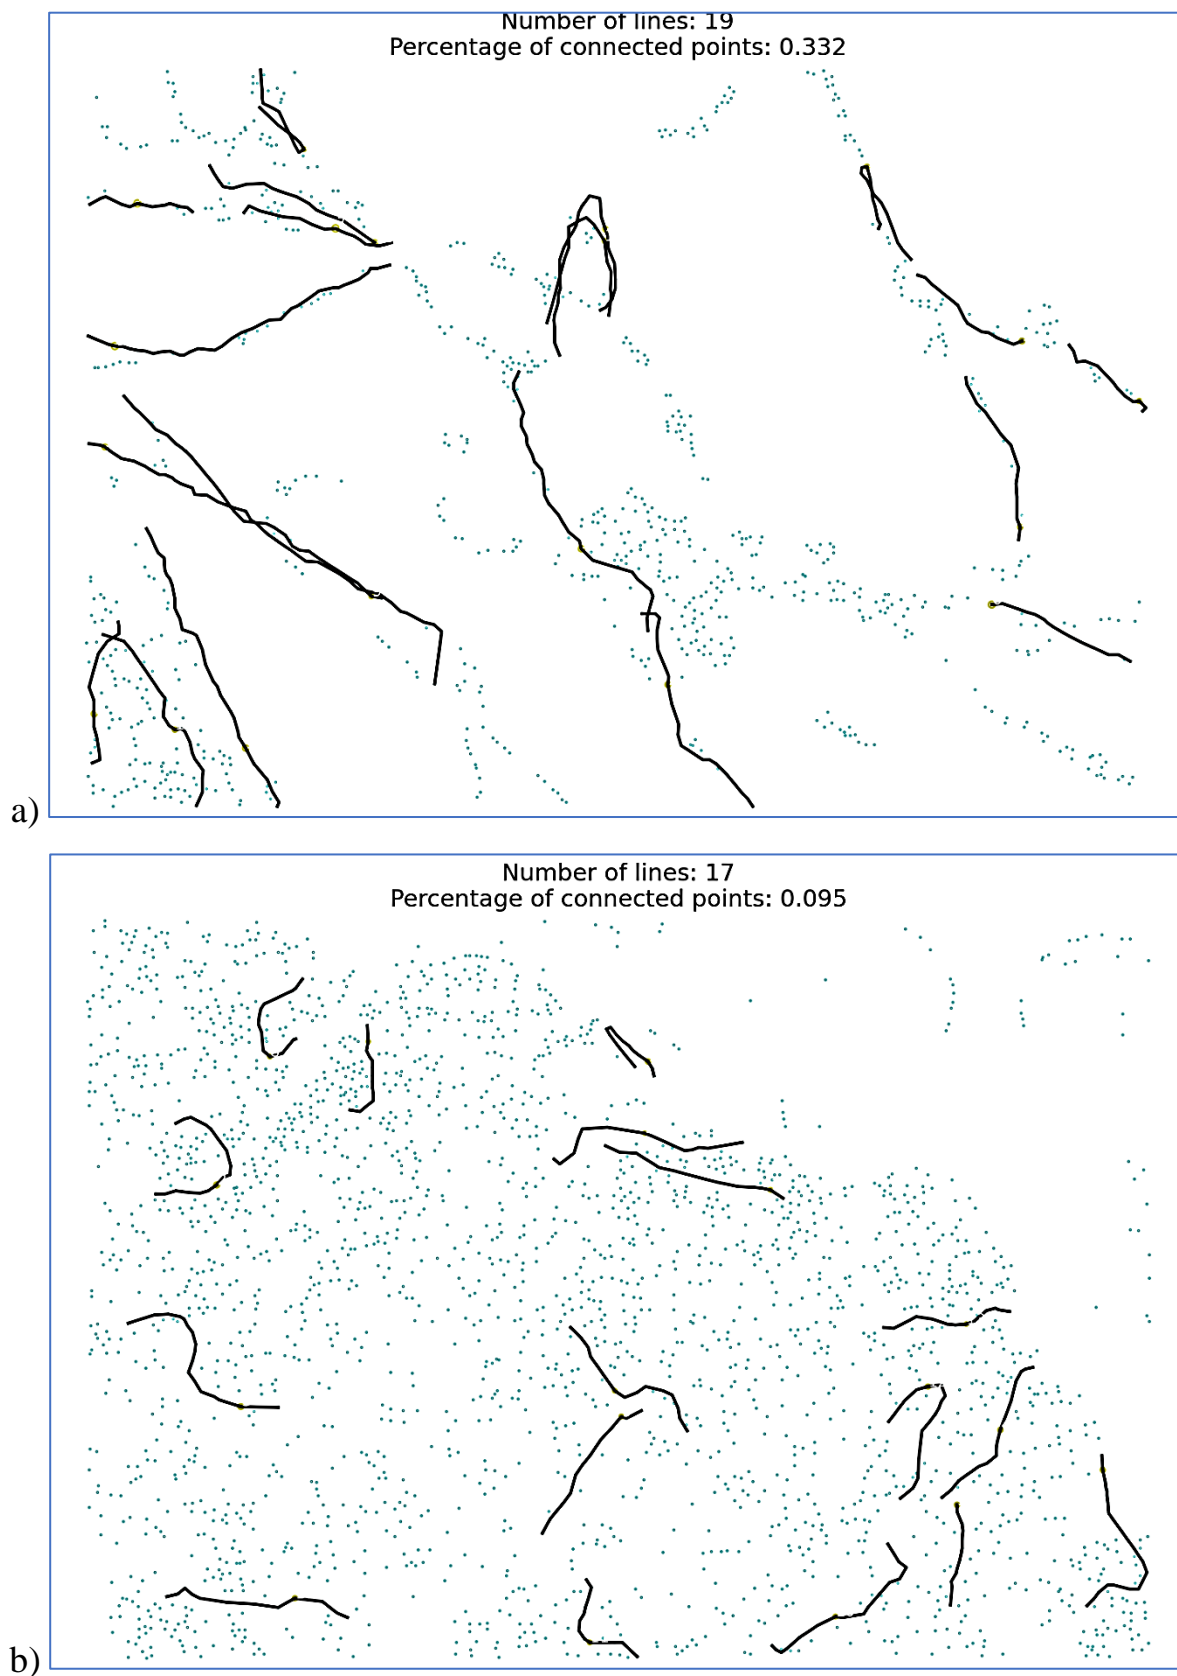

Figure 6 – Results of constructing lines for the proportionality coefficient for early stopping in local groups formation  $k = 6$ . The arrangement of the particles in the SEM image:  
a) ordered (S1-42); b) disordered (S3-157)

Figure 7 shows the results of constructing lines for the weight coefficient for estimating the local nanoparticles density in a SEM image  $w_d = 1.0$ . The other parameters are unchanged.

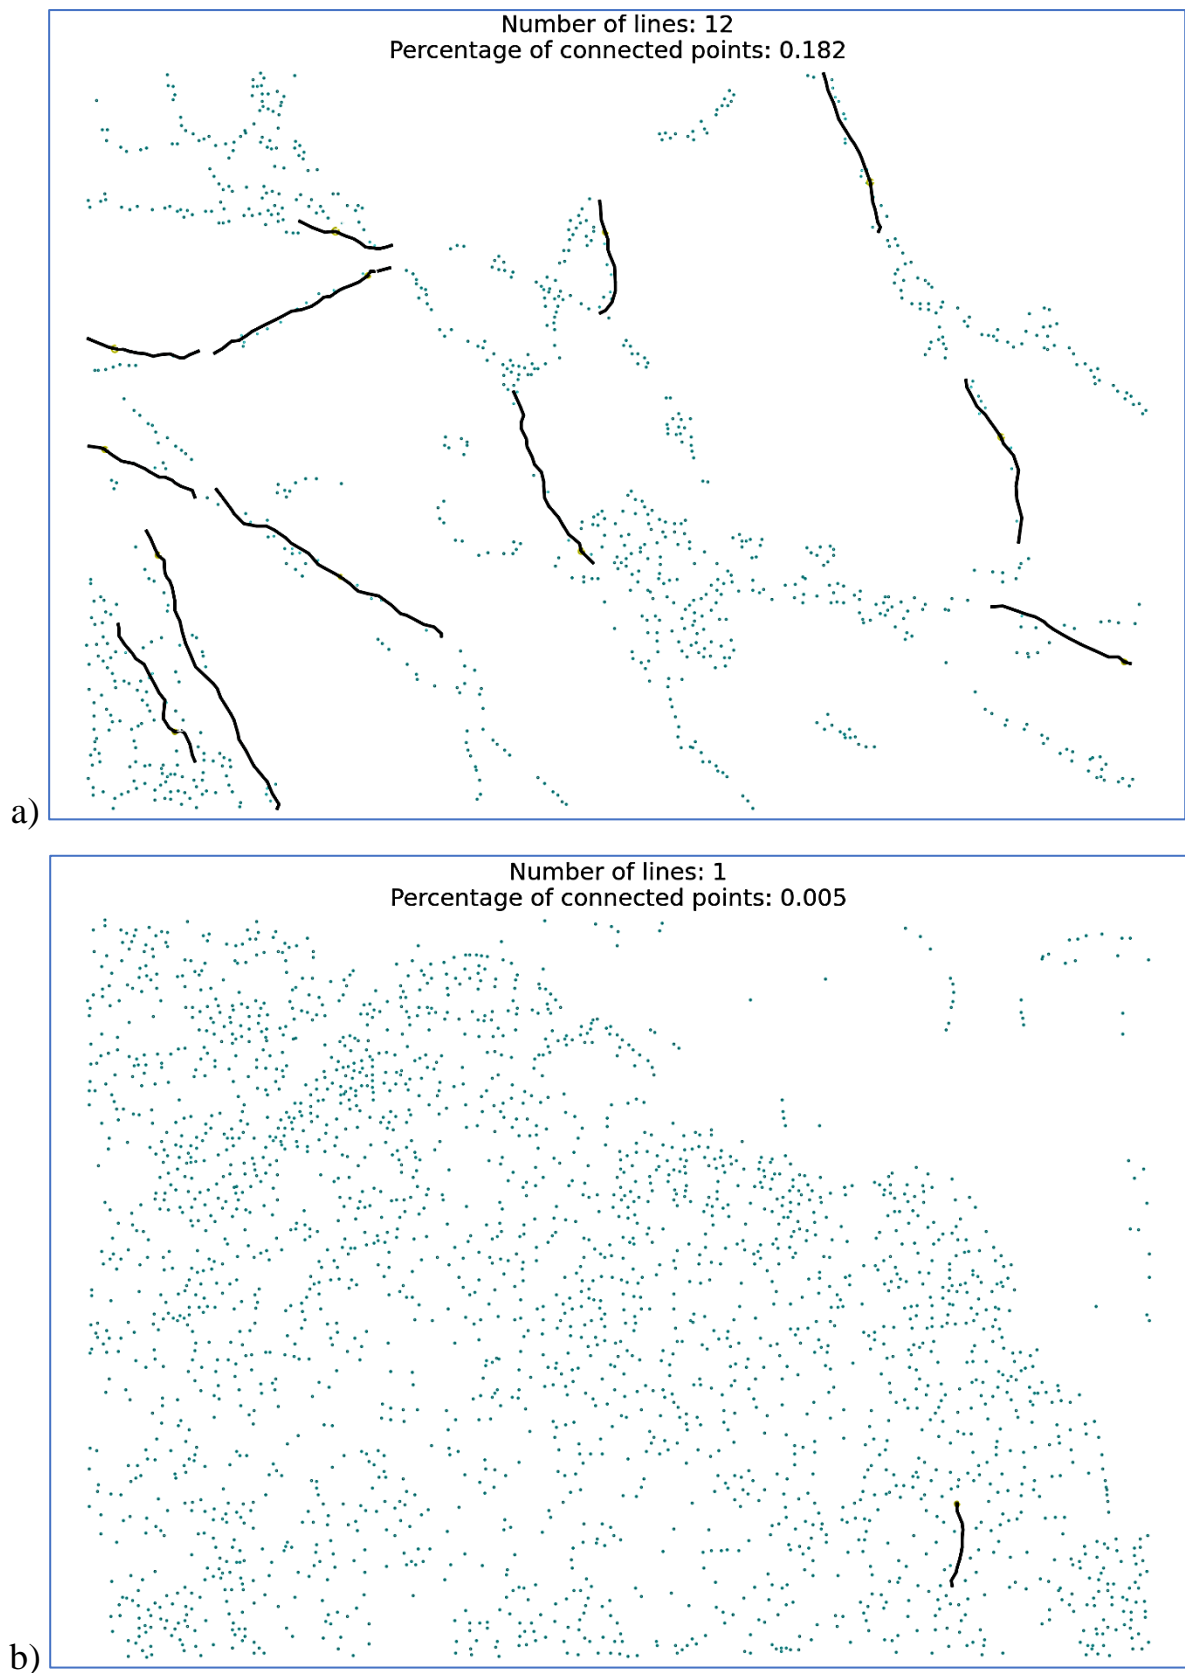

Figure 7 – Results of constructing lines for the weight coefficient for estimating the local nanoparticles density in a SEM image  $w_d = 1.0$ . The arrangement of the particles in the SEM image: a) ordered (S1-42); b) disordered (S3-157)

Figure 8 shows the results of constructing lines for the weight coefficient for estimating the local nanoparticles density in a SEM image  $w_d = 1.25$ . The other parameters are unchanged.

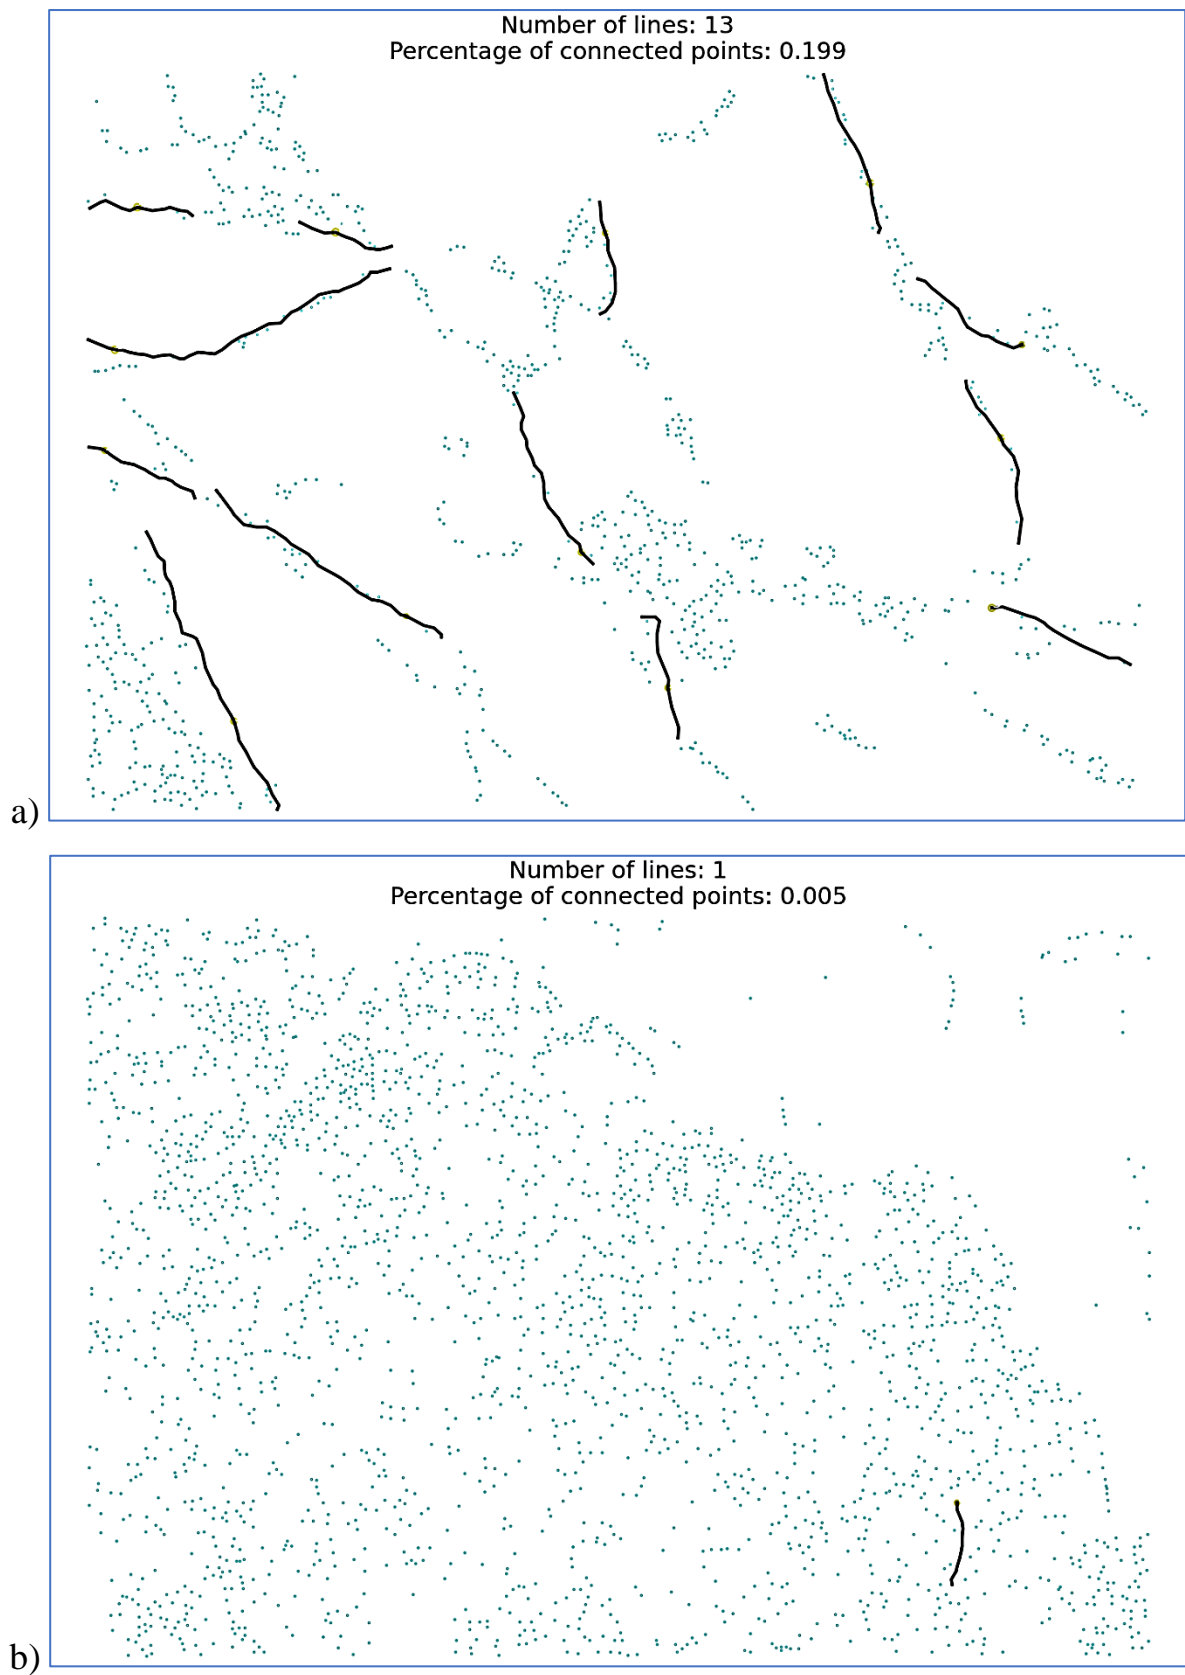

Figure 8 – Results of constructing lines for the weight coefficient for estimating the local nanoparticles density in a SEM image  $w_d = 1.25$ . The arrangement of the particles in the SEM image: a) ordered (S1-42); b) disordered (S3-157)

Figure 9 shows the results of constructing lines for the weight coefficient for estimating the local nanoparticles density in a SEM image  $w_d = 1.75$ . The other parameters are unchanged.

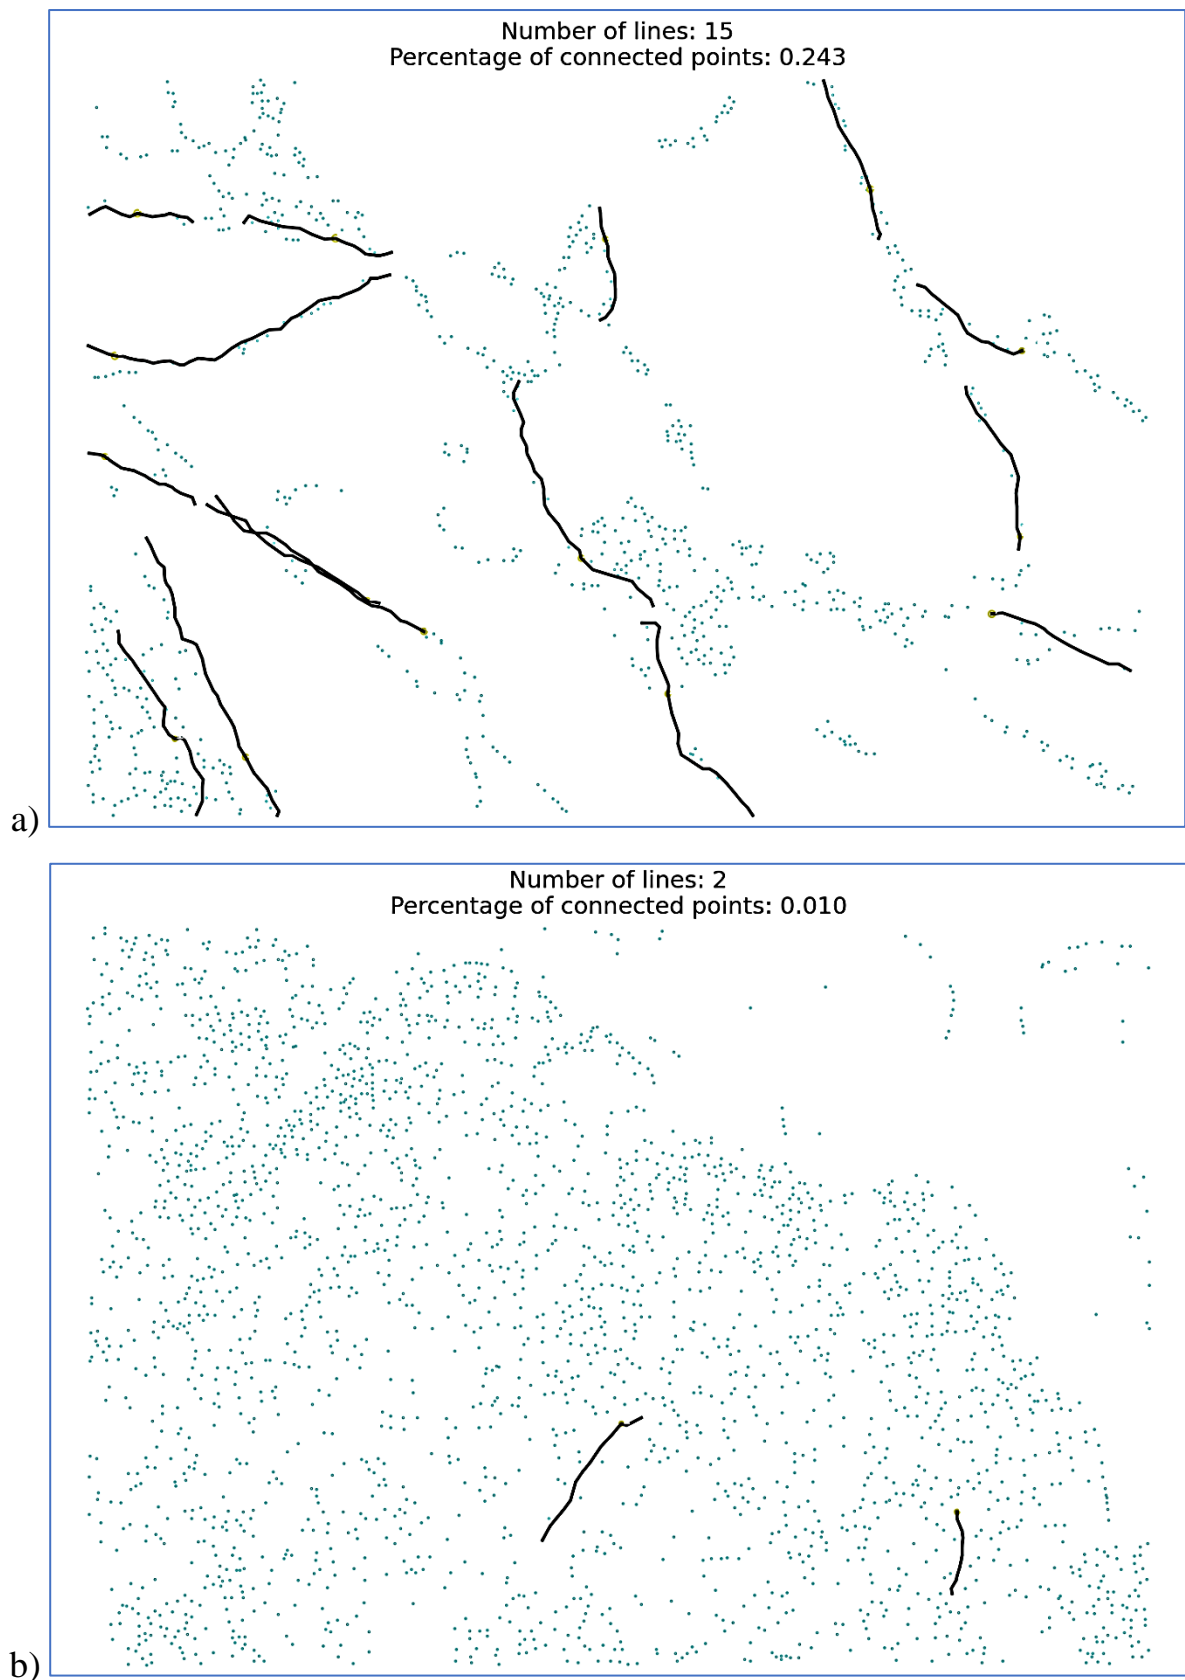

Figure 9 – Results of constructing lines for the weight coefficient for estimating the local nanoparticles density in a SEM image  $w_d = 1.75$ . The arrangement of the particles in the SEM image: a) ordered (S1-42); b) disordered (S3-157)

Figure 10 shows the results of constructing lines for the weight coefficient for estimating the local nanoparticles density in a SEM image  $w_d = 2.0$ . The other parameters are unchanged.

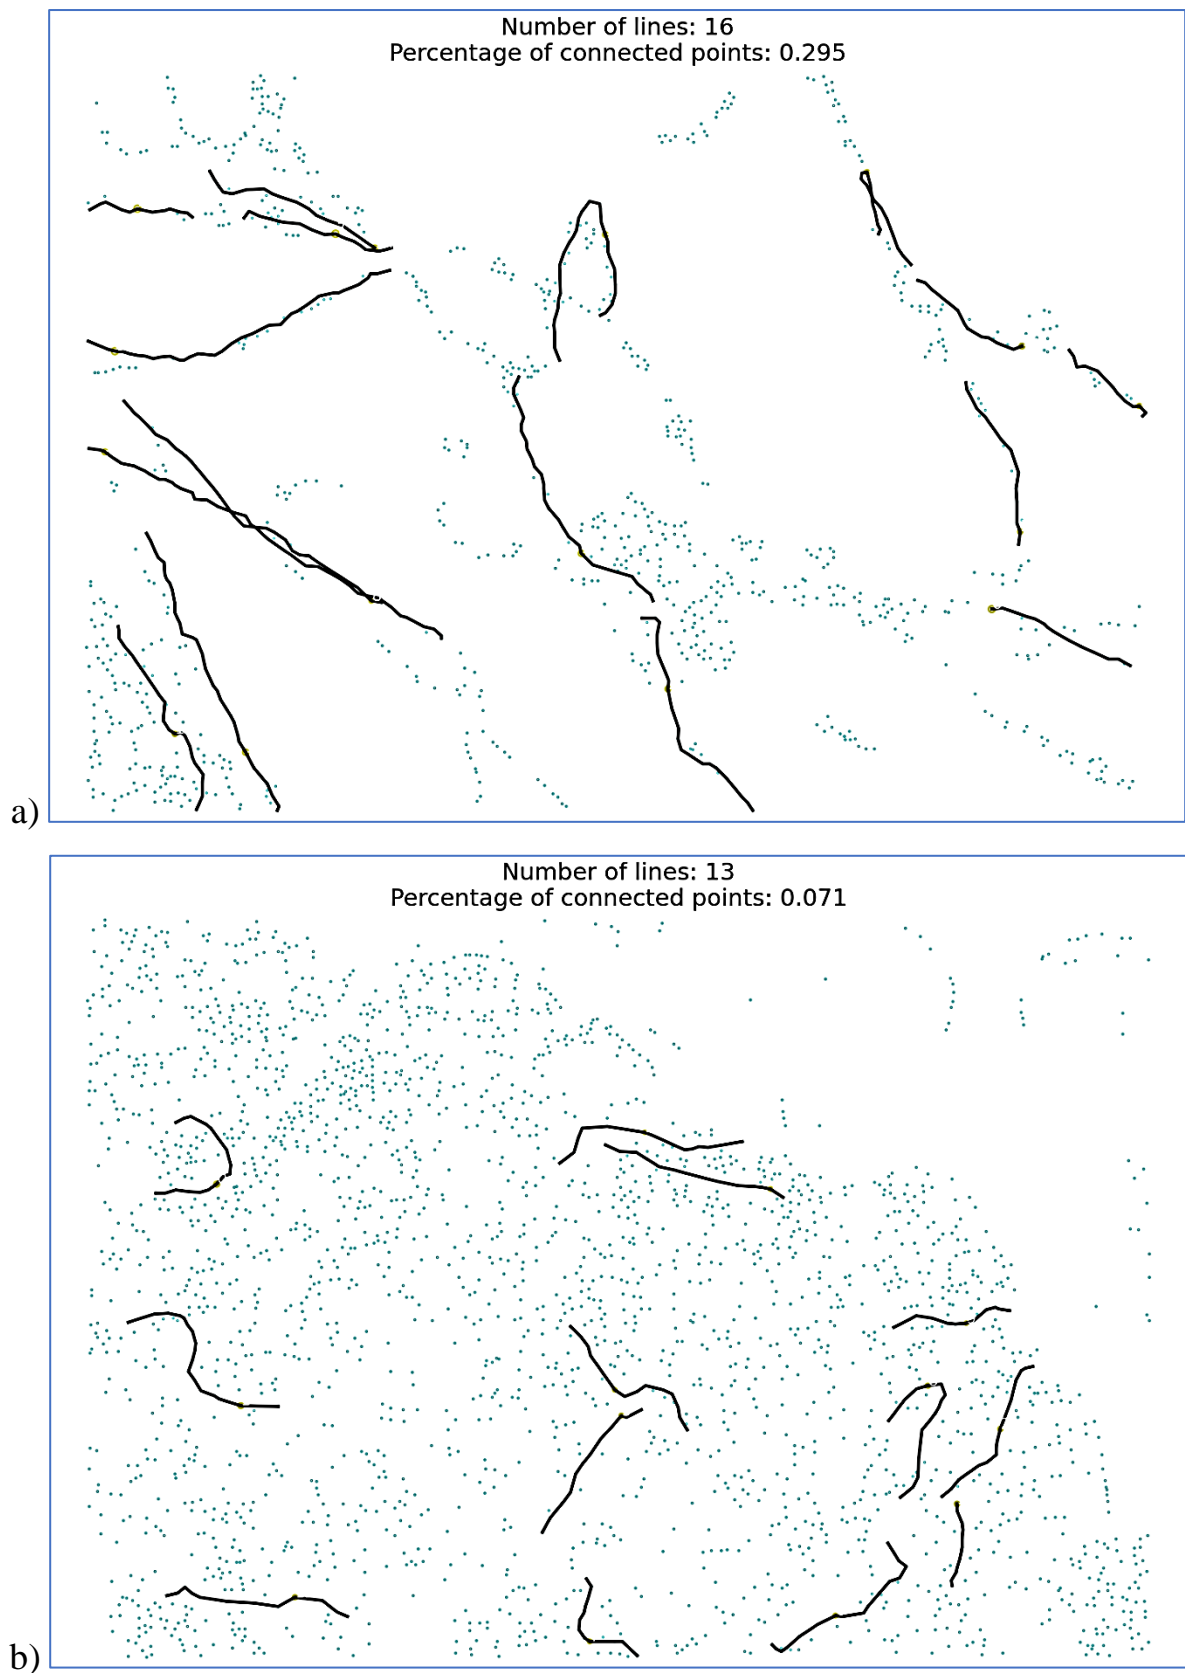

Figure 10 – Results of constructing lines for the weight coefficient for estimating the local nanoparticles density in a SEM image  $w_d = 2.0$ . The arrangement of the particles in the SEM image: a) ordered (S1-42); b) disordered (S3-157)



Figure 11 shows the results of the calculating of the orientations of local groups for the maximum number of nanoparticles in a local group  $s = 4$ . The other parameters are unchanged.

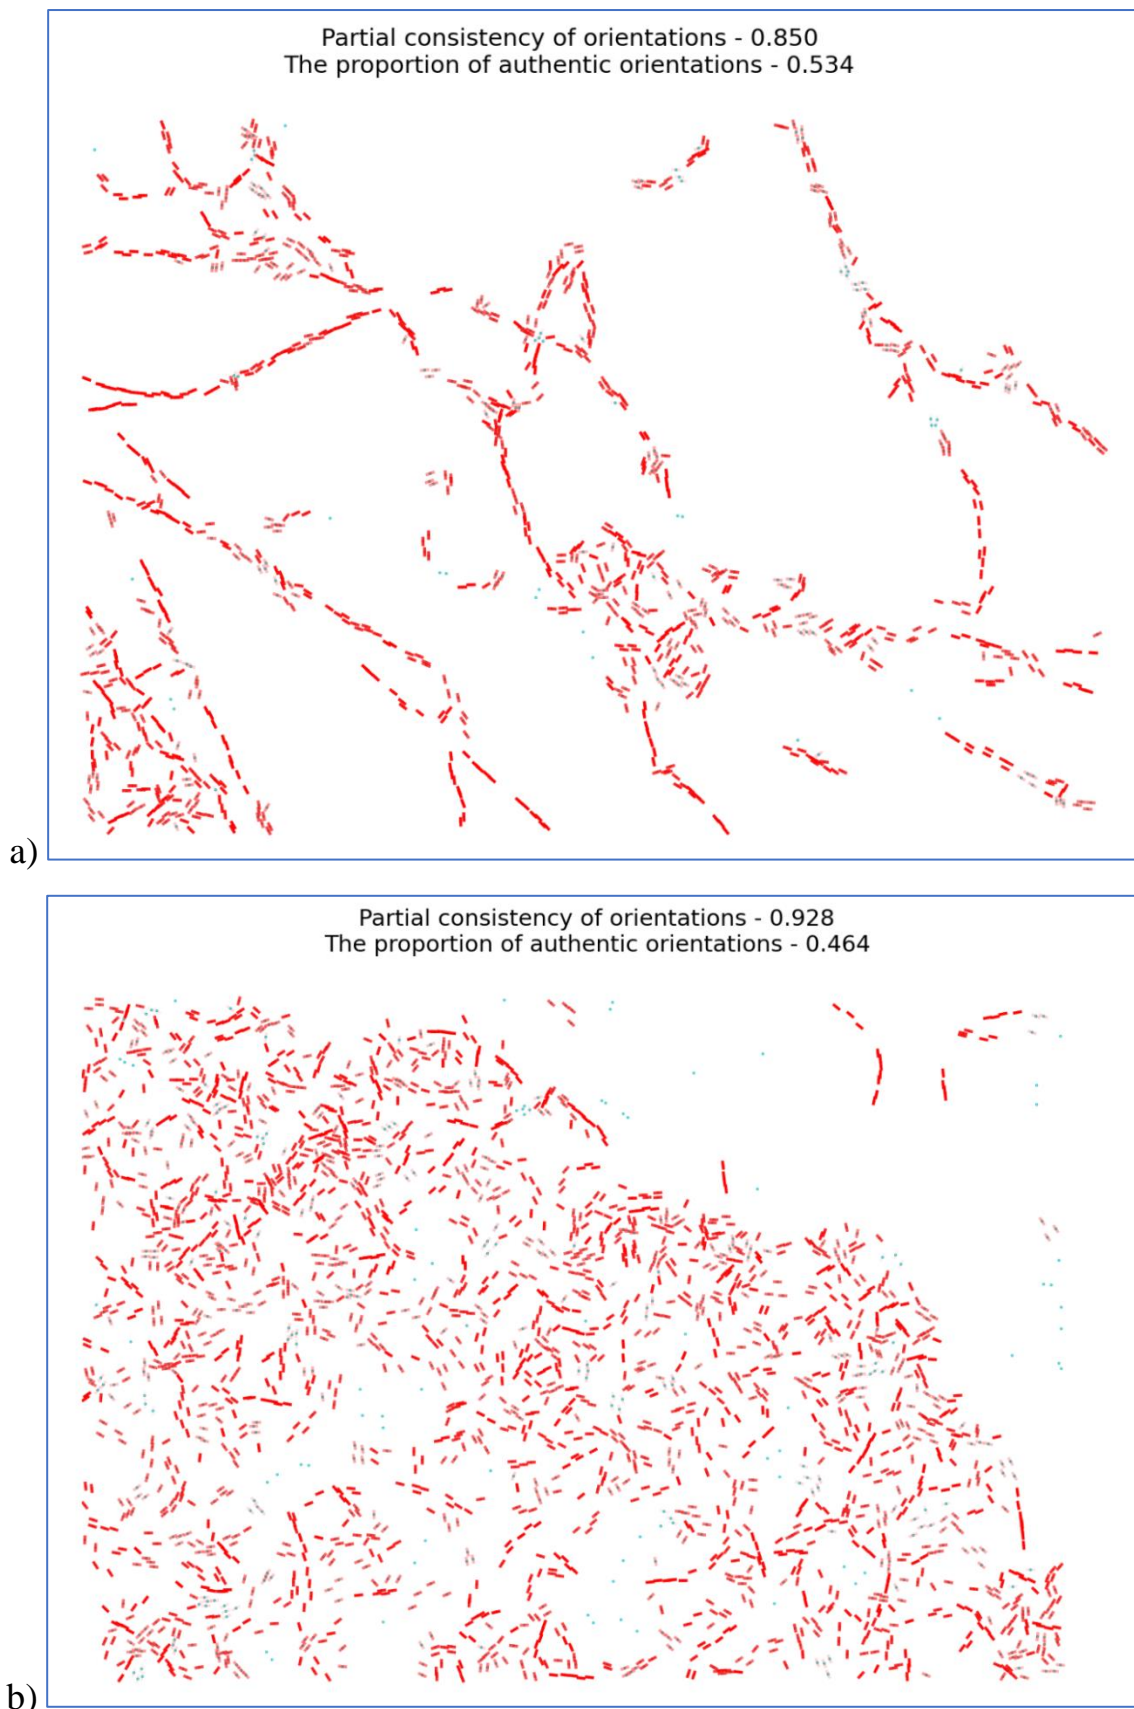

Figure 11 – The results of calculating the orientations of local groups for the maximum number of nanoparticles in a local group  $s = 4$ . The arrangement of the particles in the SEM image: a) ordered (S1-42); b) disordered (S3-157)

Figure 12 shows the results of constructing lines for the maximum number of nanoparticles in a local group  $s = 4$ . The other parameters are unchanged.

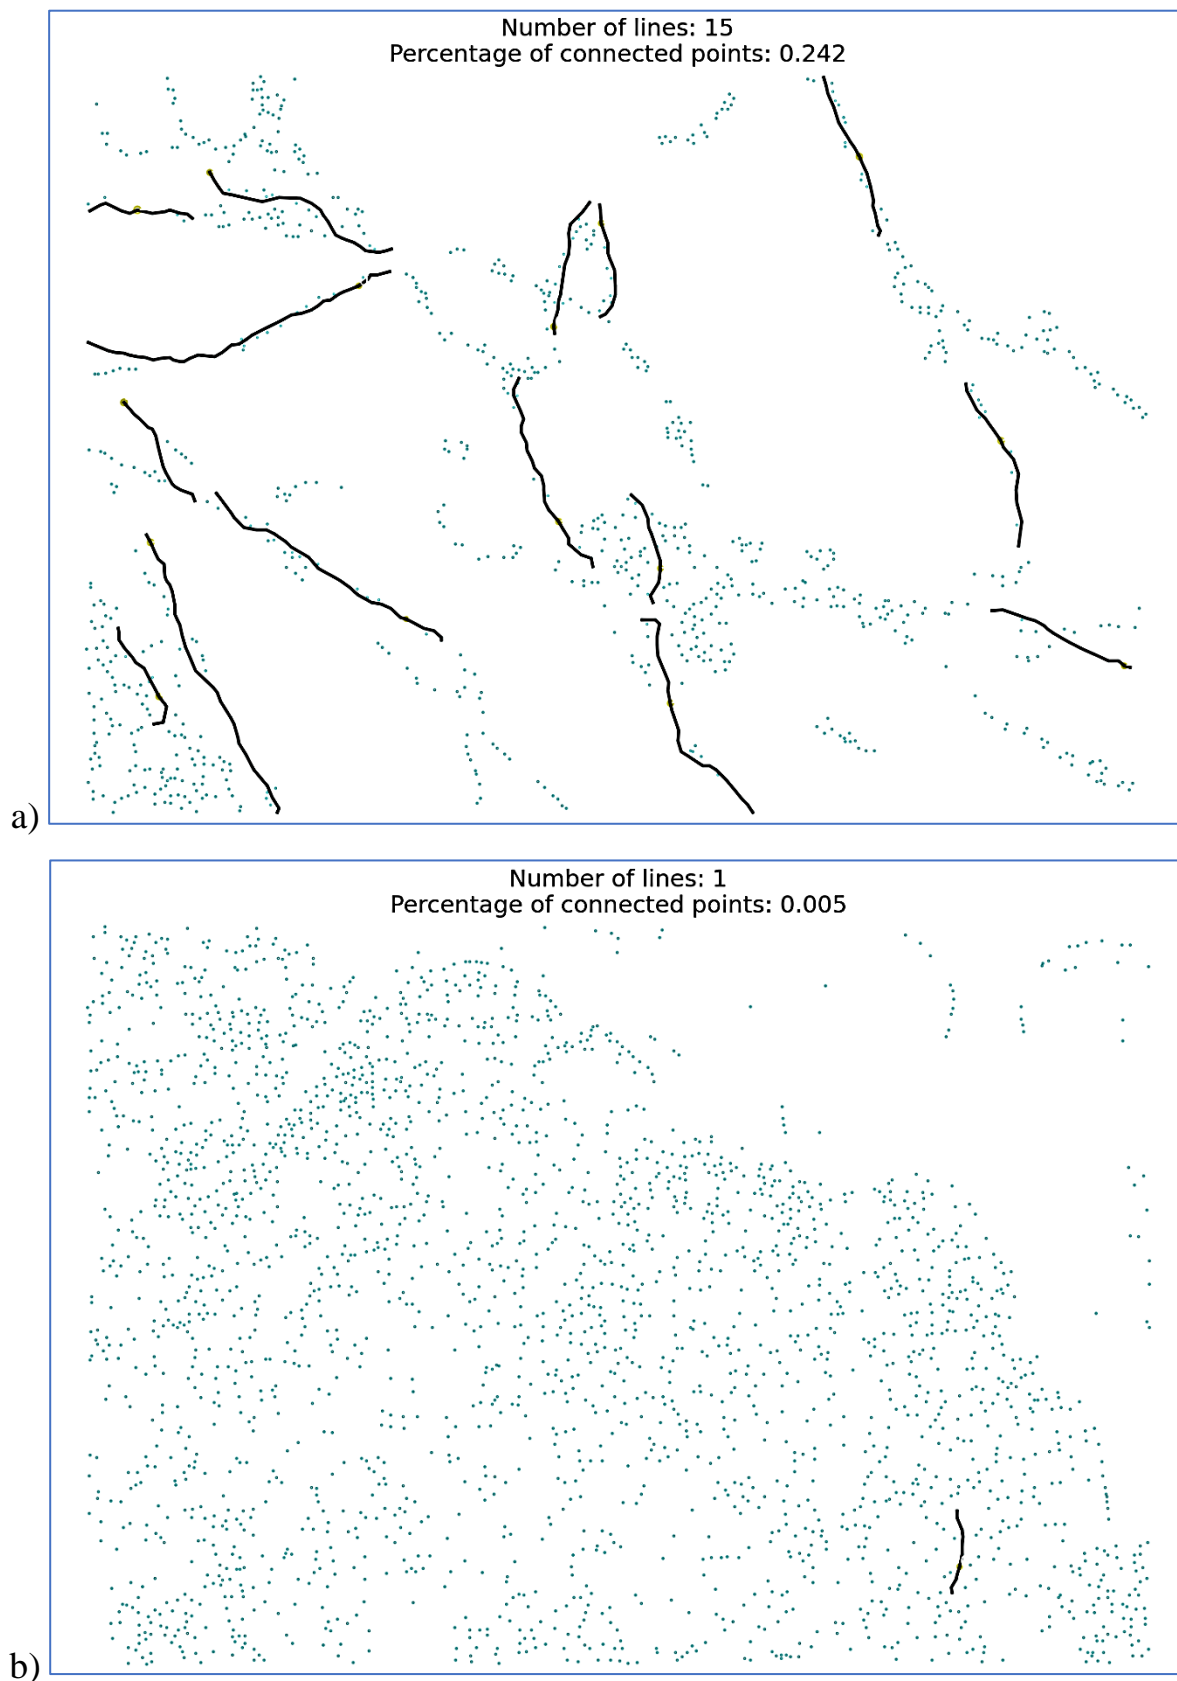

Figure 12 – Results of constructing lines for the maximum number of nanoparticles in a local group  $s = 4$ . The arrangement of the particles in the SEM image:  
a) ordered (S1-42); b) disordered (S3-157)

Figure 13 shows the results of the calculation of the orientations of local groups for the maximum number of nanoparticles in a local group  $s = 6$ . The other parameters are unchanged.

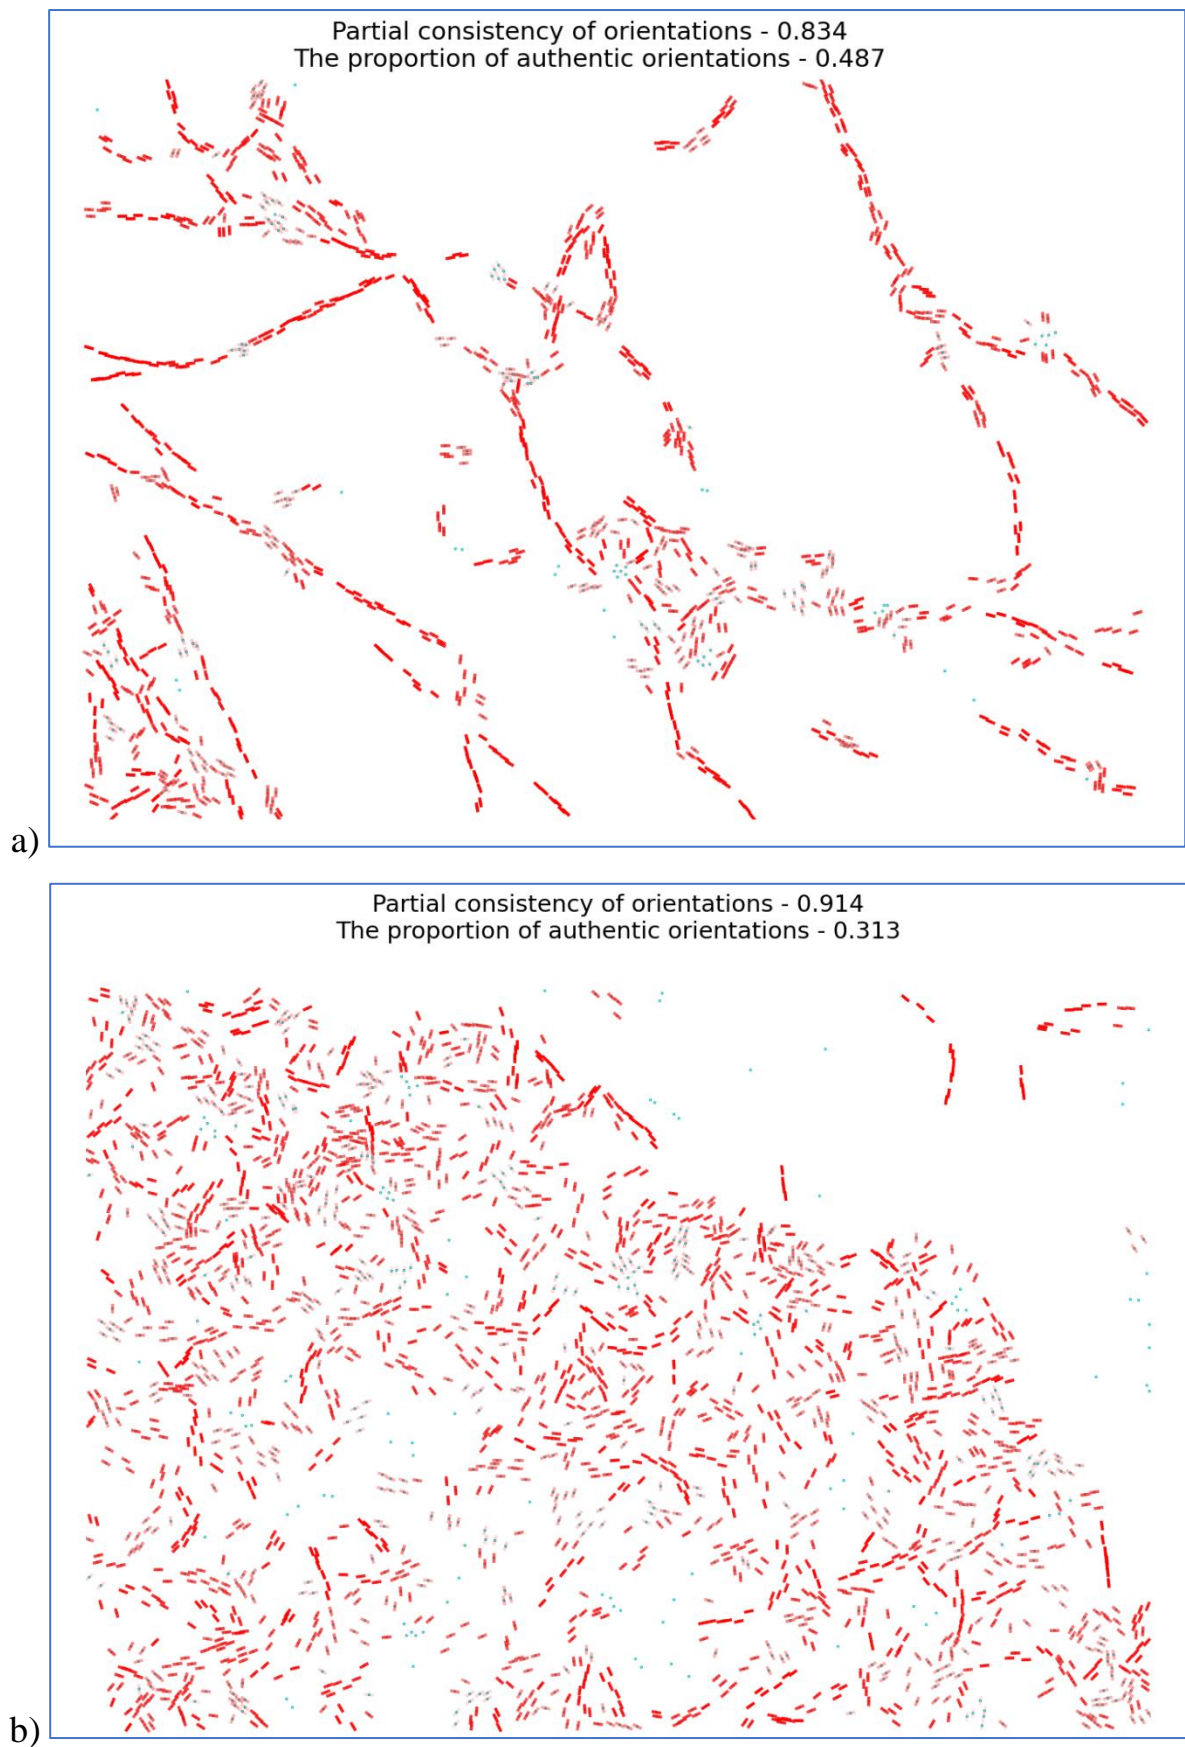

Figure 13 – Results of calculating the orientations of local groups for the maximum number of nanoparticles in a local group  $s = 6$ . The arrangement of the particles in the SEM image: a) ordered (S1-42); b) disordered (S3-157)

Figure 14 shows the results of constructing lines for the maximum number of nanoparticles in a local group  $s = 6$ . The other parameters are unchanged.

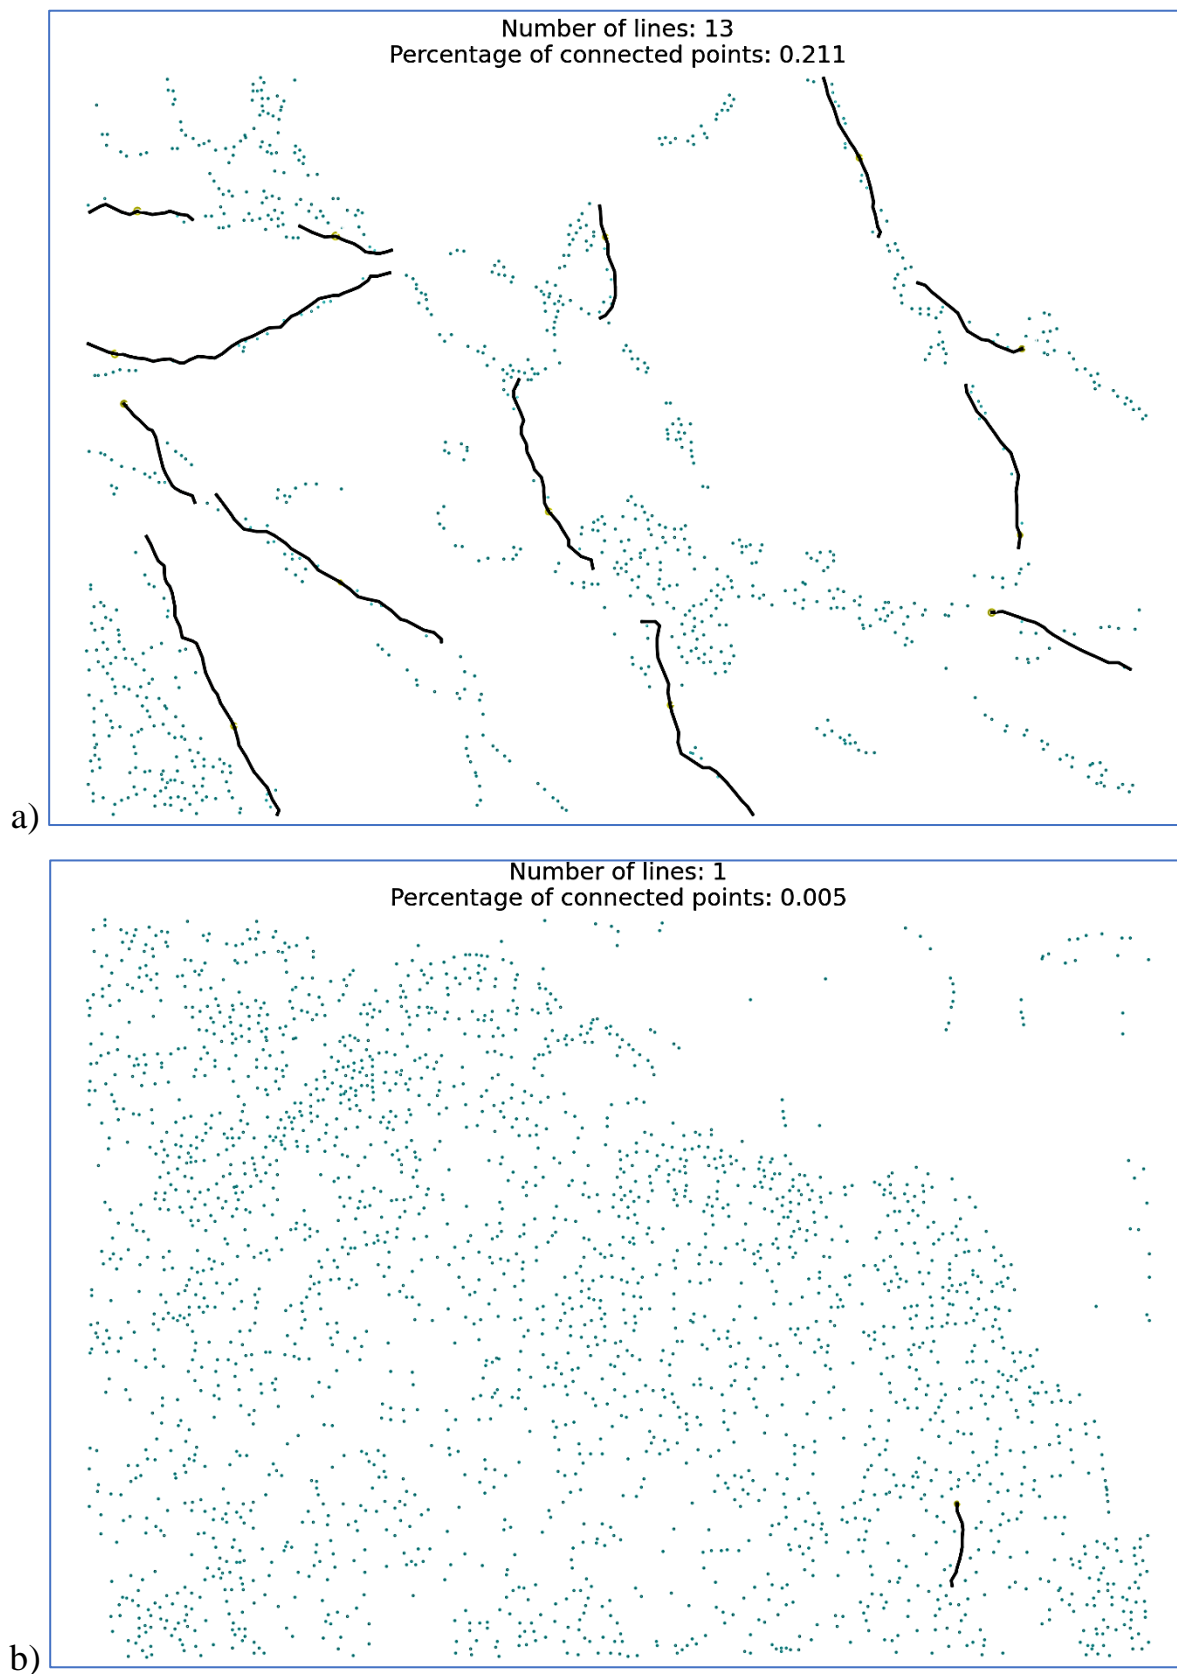

Figure 14 – Results of constructing lines for the maximum number of nanoparticles in a local group  $s = 6$ . The arrangement of the particles in the SEM image:  
a) ordered (S1-42); b) disordered (S3-157)



Figure 15 shows the results of the calculation of the orientations of local groups for the maximum number of nanoparticles in a local group  $s = 10$ . The other parameters are unchanged.

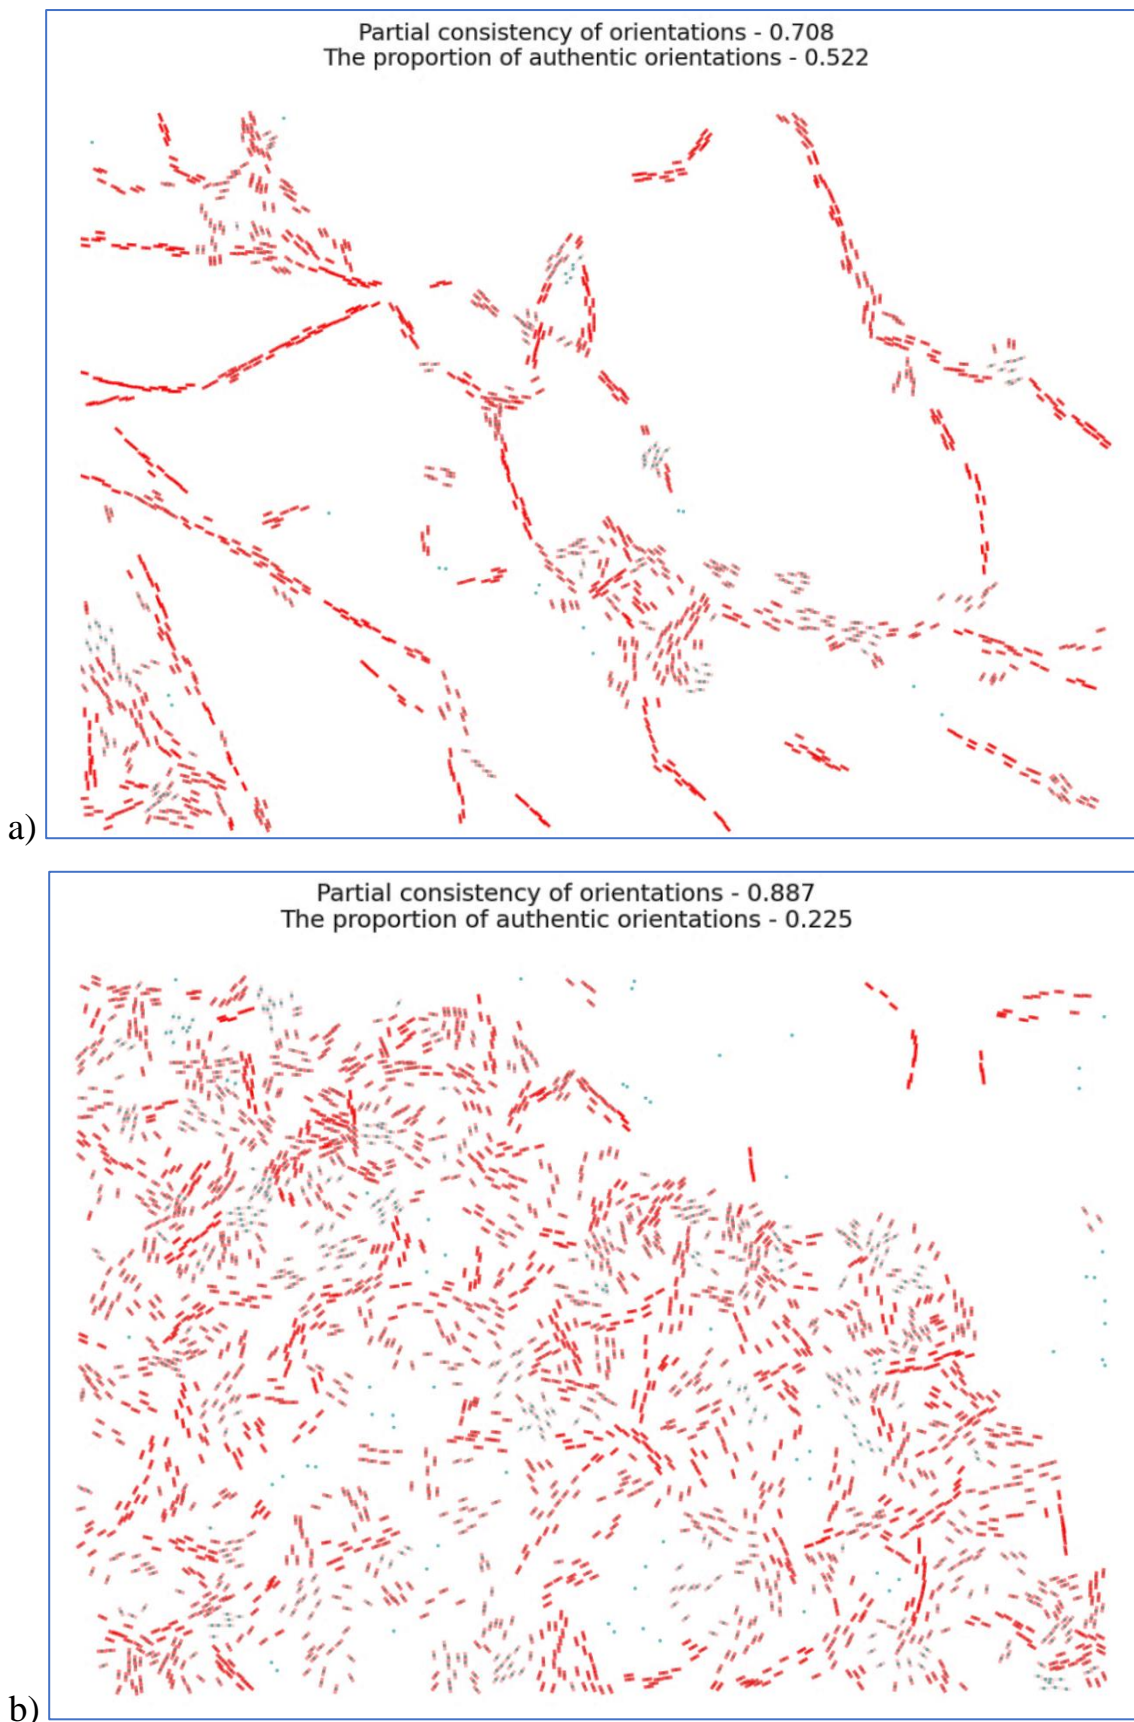

Figure 15 – Results of calculating the orientations of local groups for the maximum number of nanoparticles in a local group  $s = 10$ . The arrangement of the particles in the SEM image: a) ordered (S1-42); b) disordered (S3-157)

Figure 16 shows the results of the constructing lines for the maximum number of nanoparticles in a local group  $s = 10$ . The other parameters are unchanged.

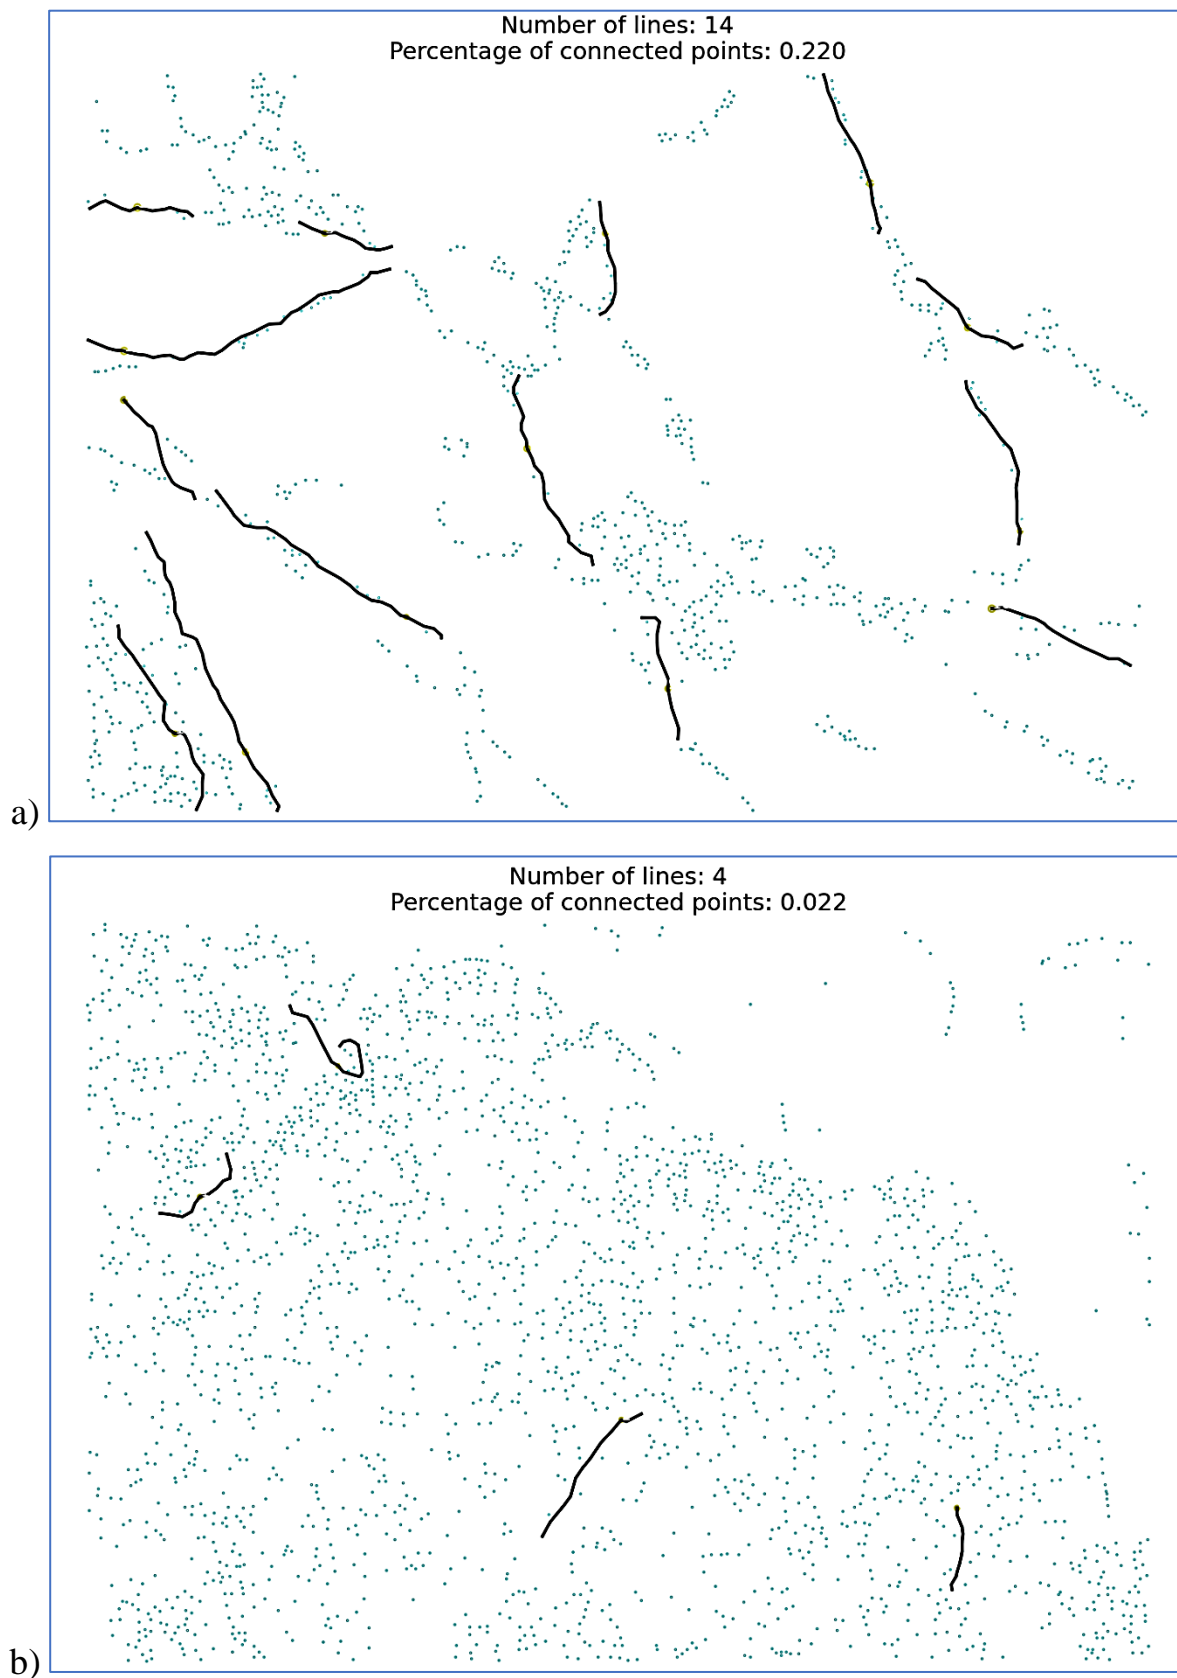

Figure 16 – Results of constructing lines for the maximum number of nanoparticles in a local group  $s = 10$ . The arrangement of the particles in the SEM image:  
a) ordered (S1-42); b) disordered (S3-157)

Figure 17 shows the results of the calculation of the orientations of local groups for the maximum number of nanoparticles in a local group  $s = 15$ . The other parameters are unchanged.

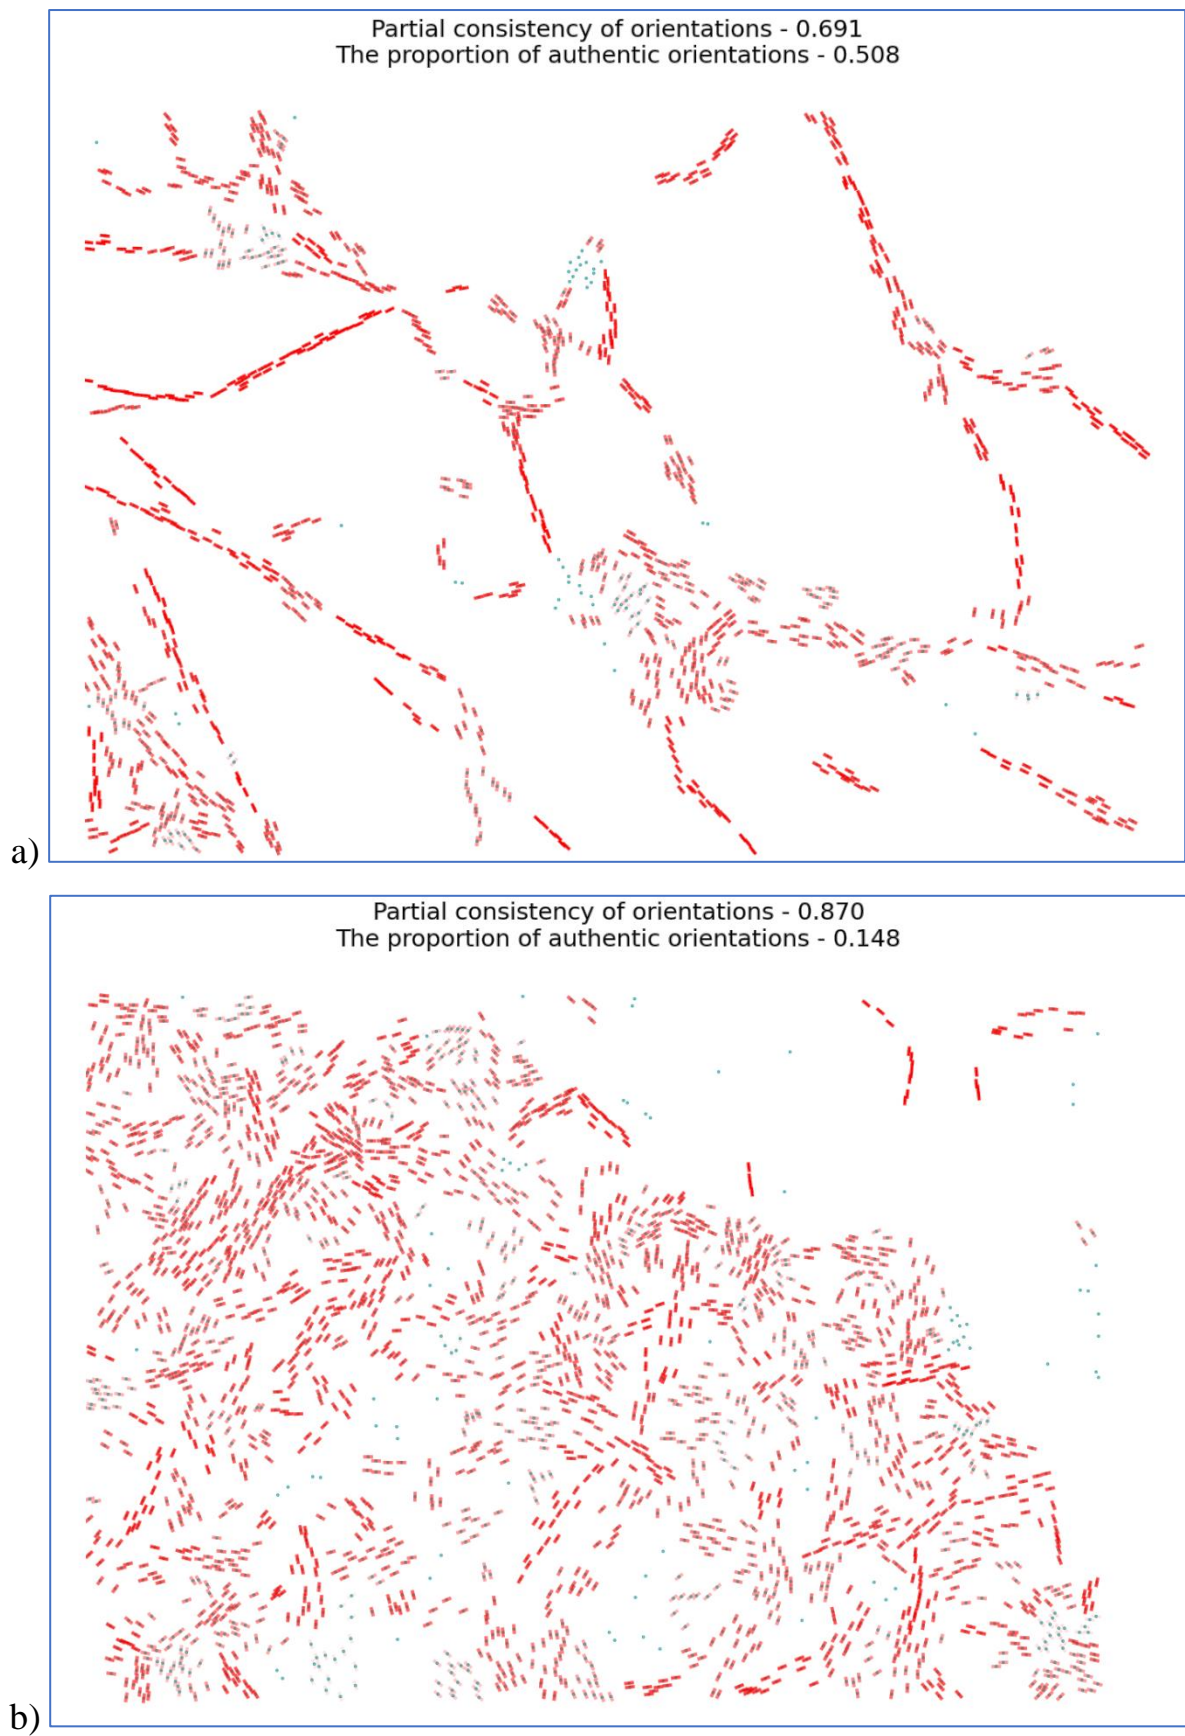

Figure 17 – Results of calculating the orientations of local groups for the maximum number of nanoparticles in a local group  $s = 15$ . The arrangement of the particles in the SEM image: a) ordered (S1-42); b) disordered (S3-157)



Figure 18 shows the results of constructing lines for the maximum number of nanoparticles in a local group  $s = 15$ . The other parameters are unchanged.

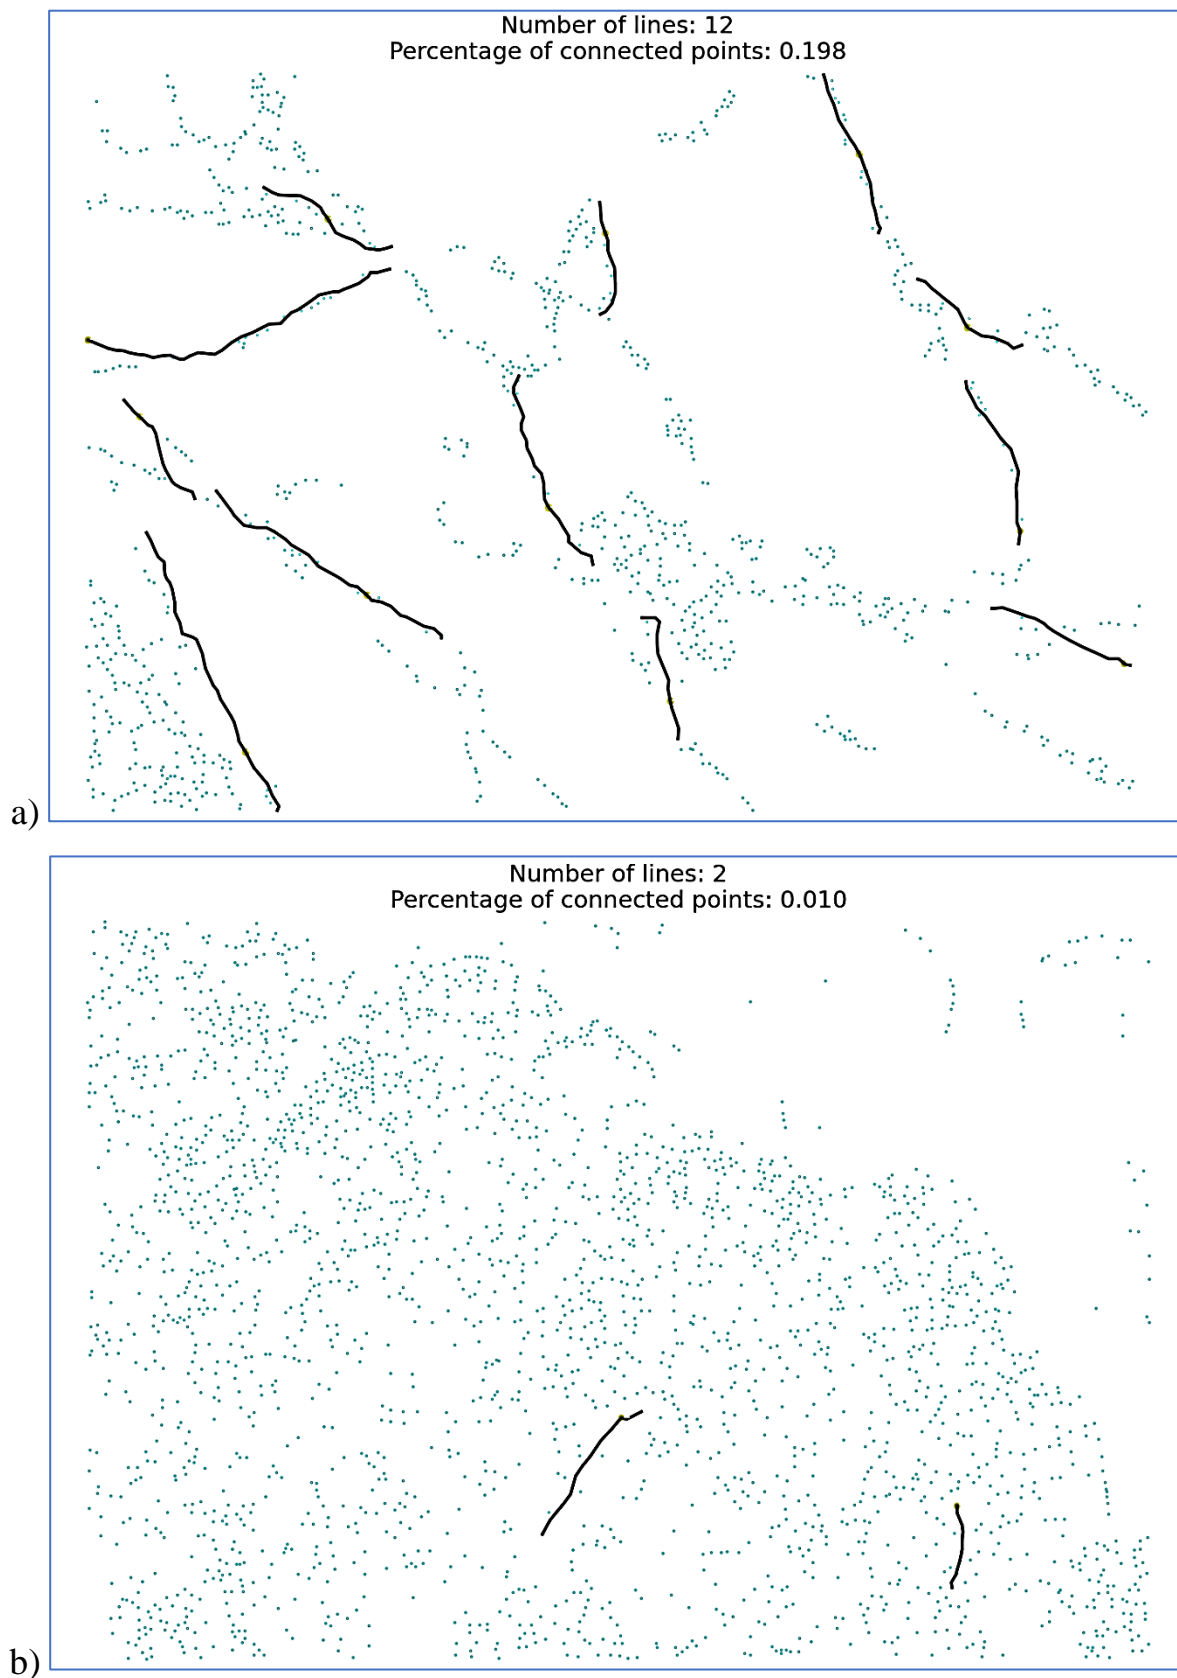

Figure 18 – Results of constructing lines for the maximum number of nanoparticles in a local group  $s = 15$ . The arrangement of the particles in the SEM image:  
a) ordered (S1-42); b) disordered (S3-157)

Figure 19 shows the results of the calculation of the orientations of local groups for the maximum number of nanoparticles in a local group  $s = 20$ . The other parameters are unchanged.

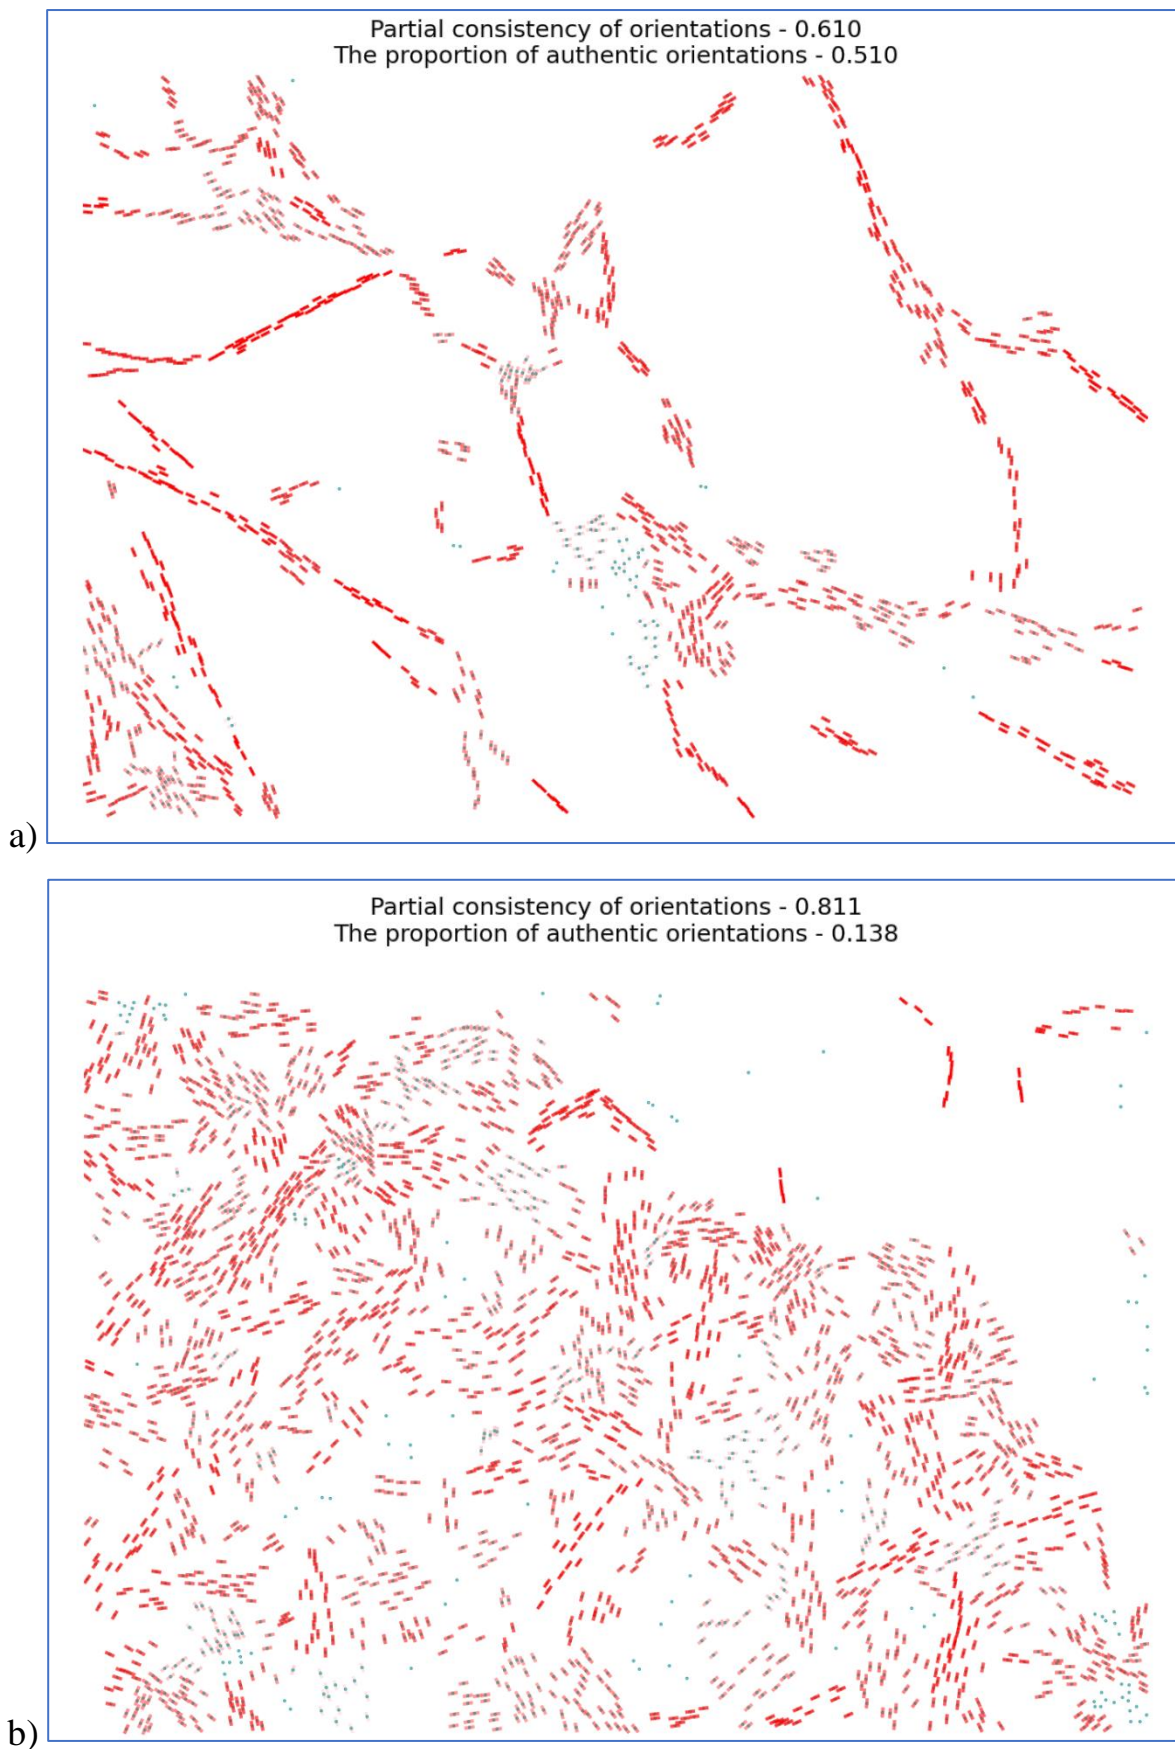

Figure 19 – Results of calculating the orientations of local groups for the maximum number of nanoparticles in a local group  $s = 20$ . The arrangement of the particles in the SEM image: a) ordered (S1-42); b) disordered (S3-157)

Figure 20 shows the results of the constructing lines for the maximum number of nanoparticles in a local group  $s = 20$ . The other parameters are unchanged.

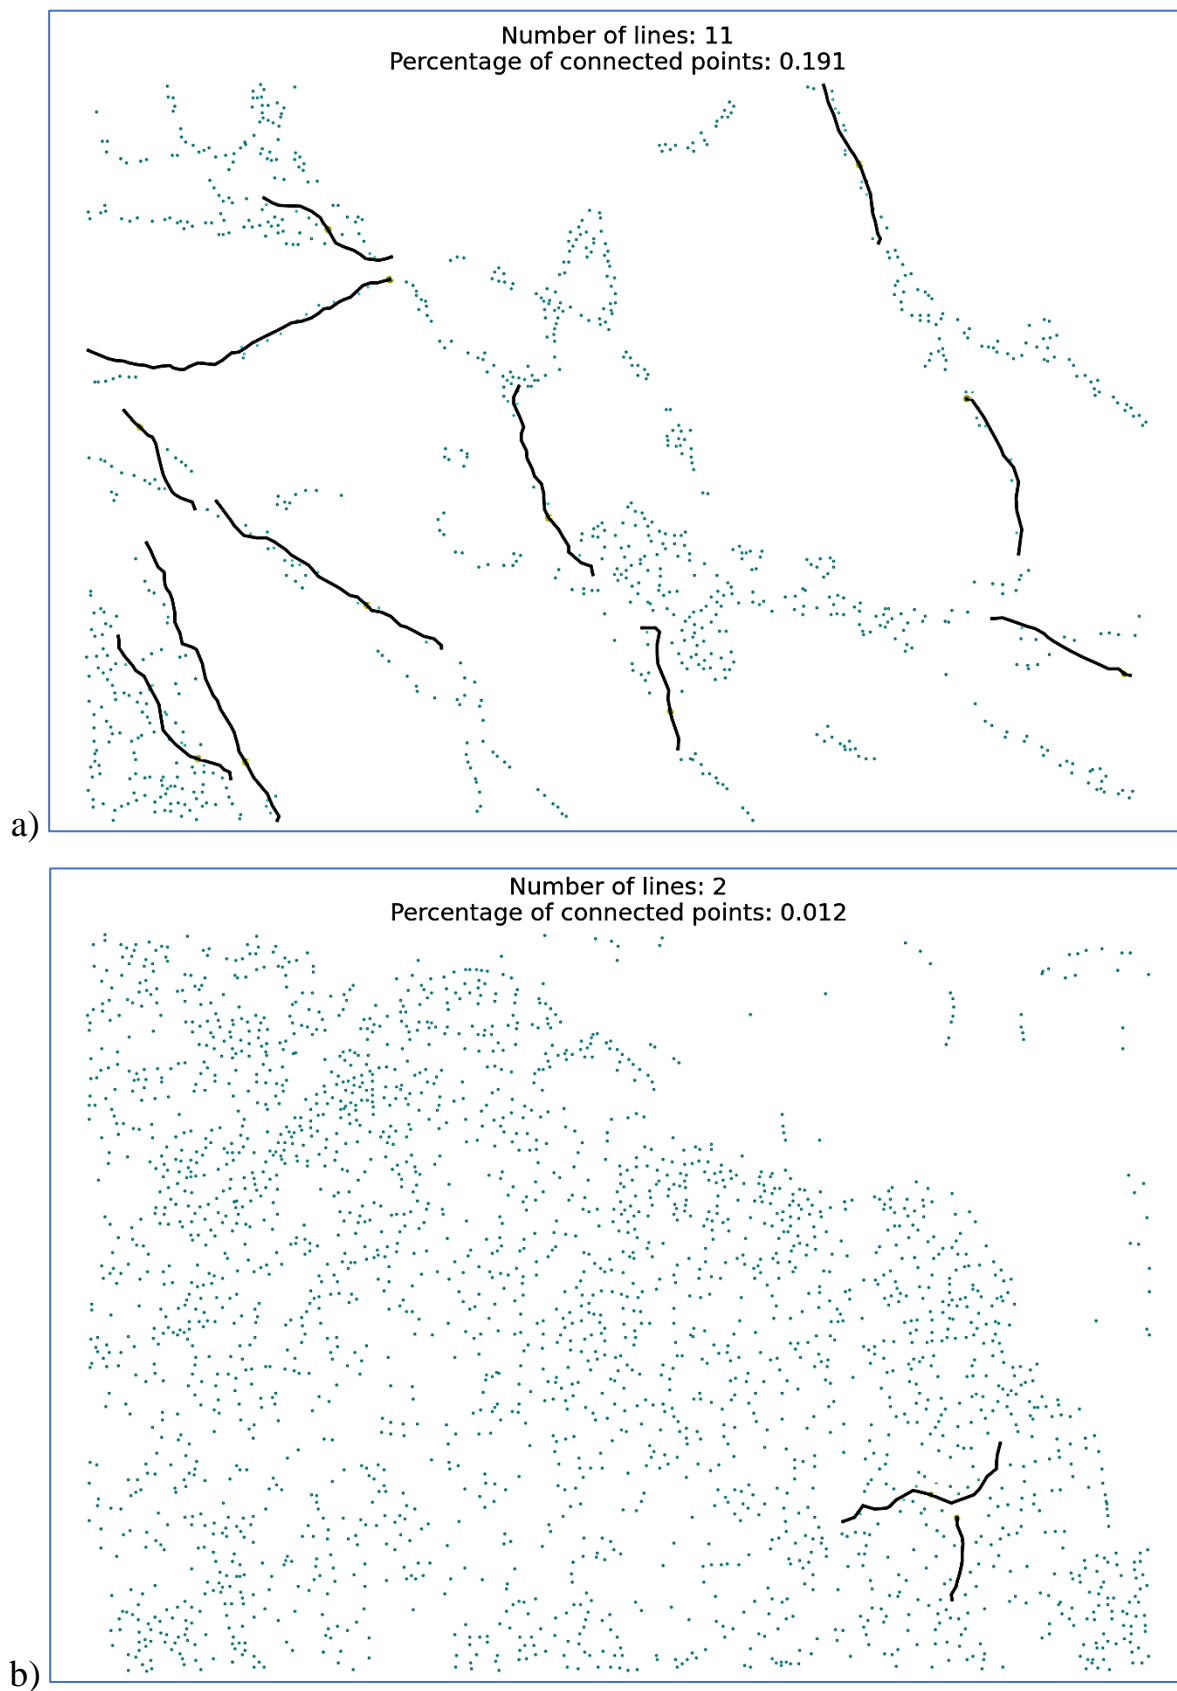

Figure 20 – Results of constructing lines for the maximum number of nanoparticles in a local group  $s = 20$ . The arrangement of the particles in the SEM image:  
a) ordered (S1-42); b) disordered (S3-157)

Figure 21 shows the results of constructing lines for the proportionality coefficient of the proposed metric of prevailing directions  $C = 0.005$ . The other parameters are unchanged.

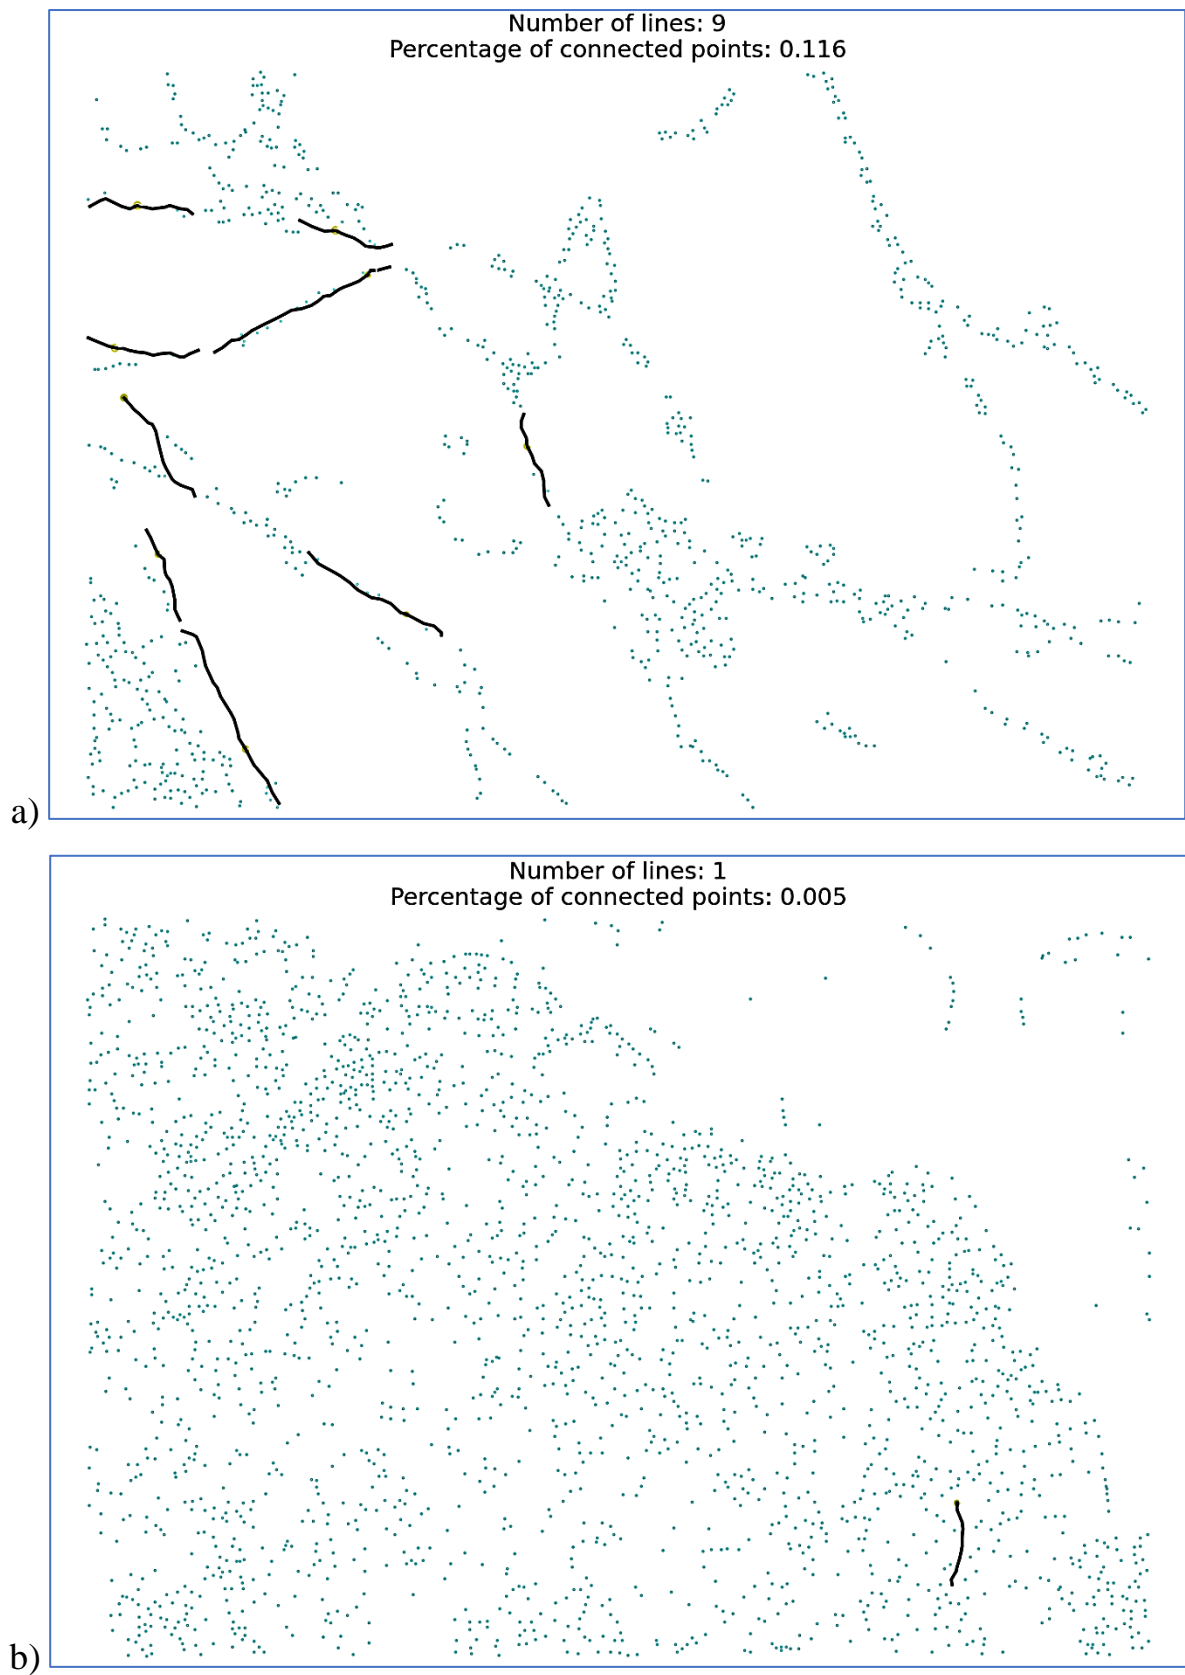

Figure 21 – Results of constructing lines for the proportionality coefficient of the proposed metric of prevailing directions  $C = 0.005$ . The arrangement of the particles in the SEM image: a) ordered (S1-42); b) disordered (S3-157)

Figure 22 shows the results of constructing lines for the proportionality coefficient of the proposed metric of prevailing directions  $C = 0.01$ . The other parameters are unchanged.

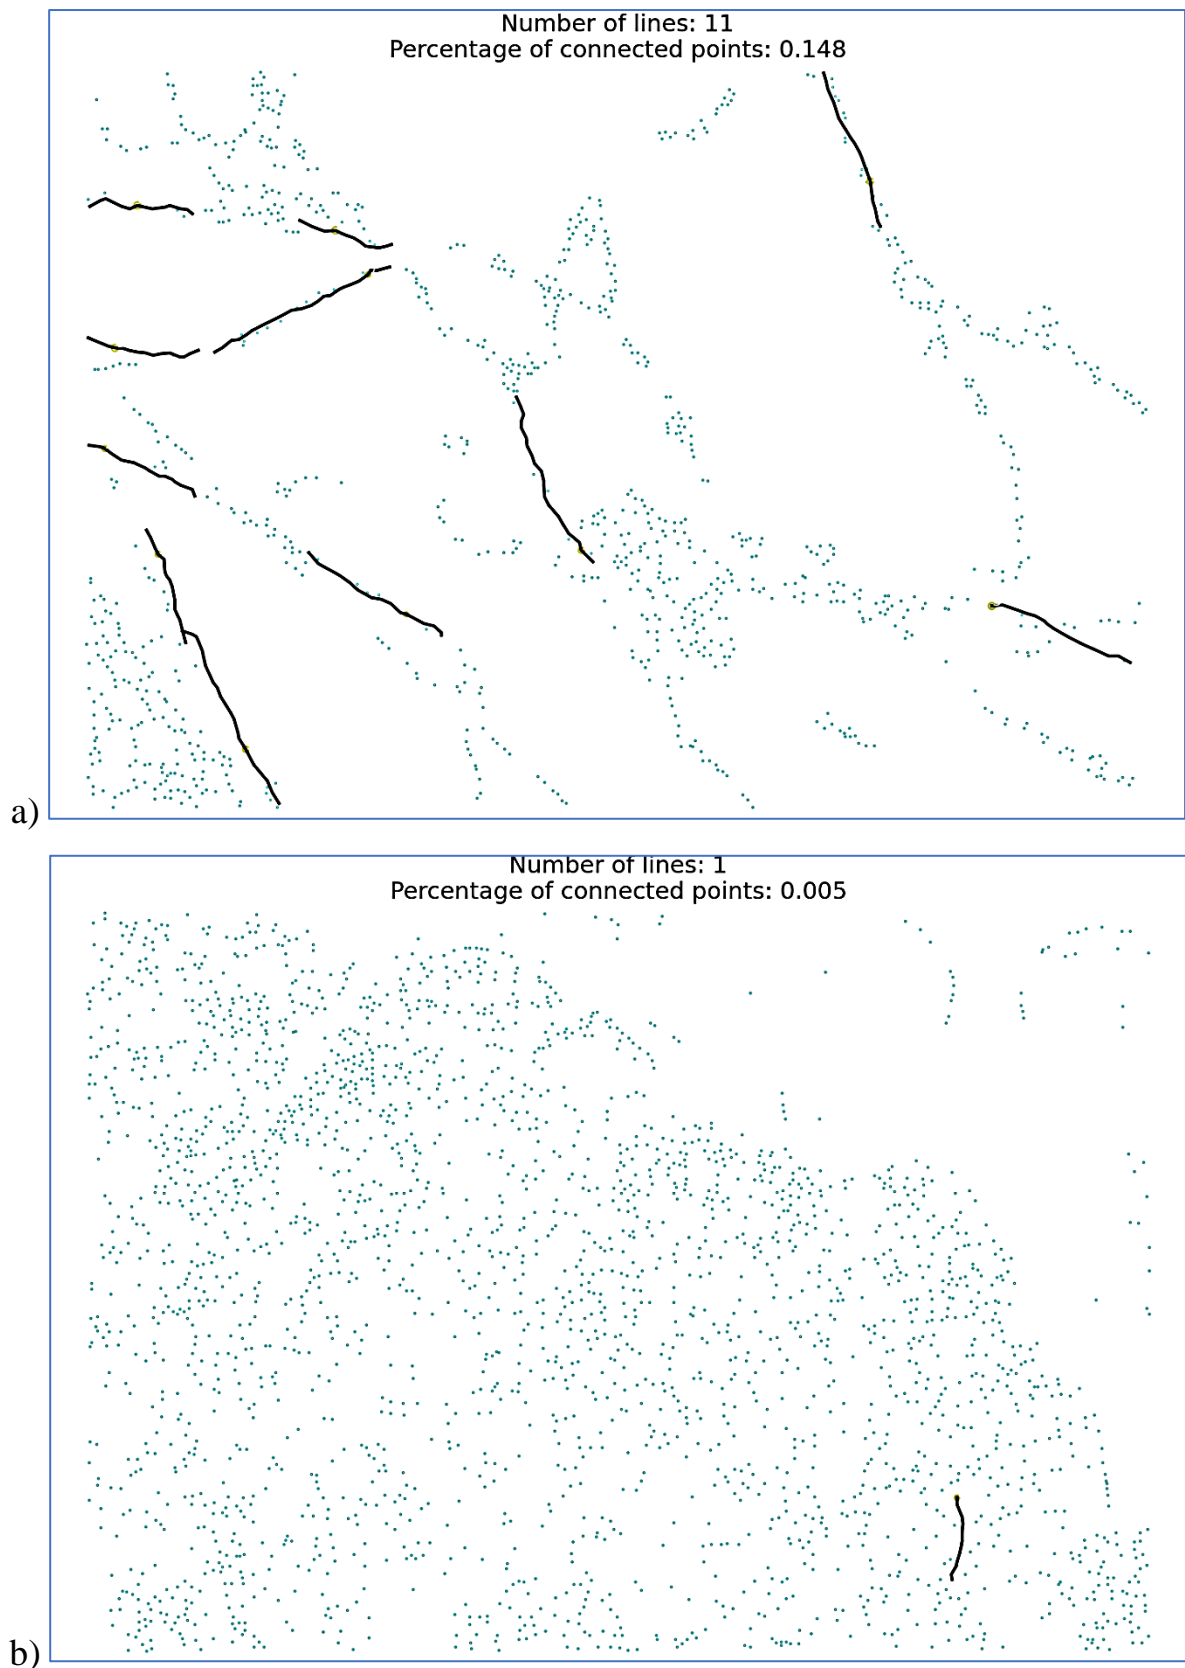

Figure 22 – Results of constructing lines for the proportionality coefficient of the proposed metric of prevailing directions  $C = 0.01$ . The arrangement of the particles in the SEM image:  
a) ordered (S1-42); b) disordered (S3-157)

Figure 23 shows the results of constructing lines for the proportionality coefficient of the proposed metric of prevailing directions  $C = 0.015$ . The other parameters are unchanged.

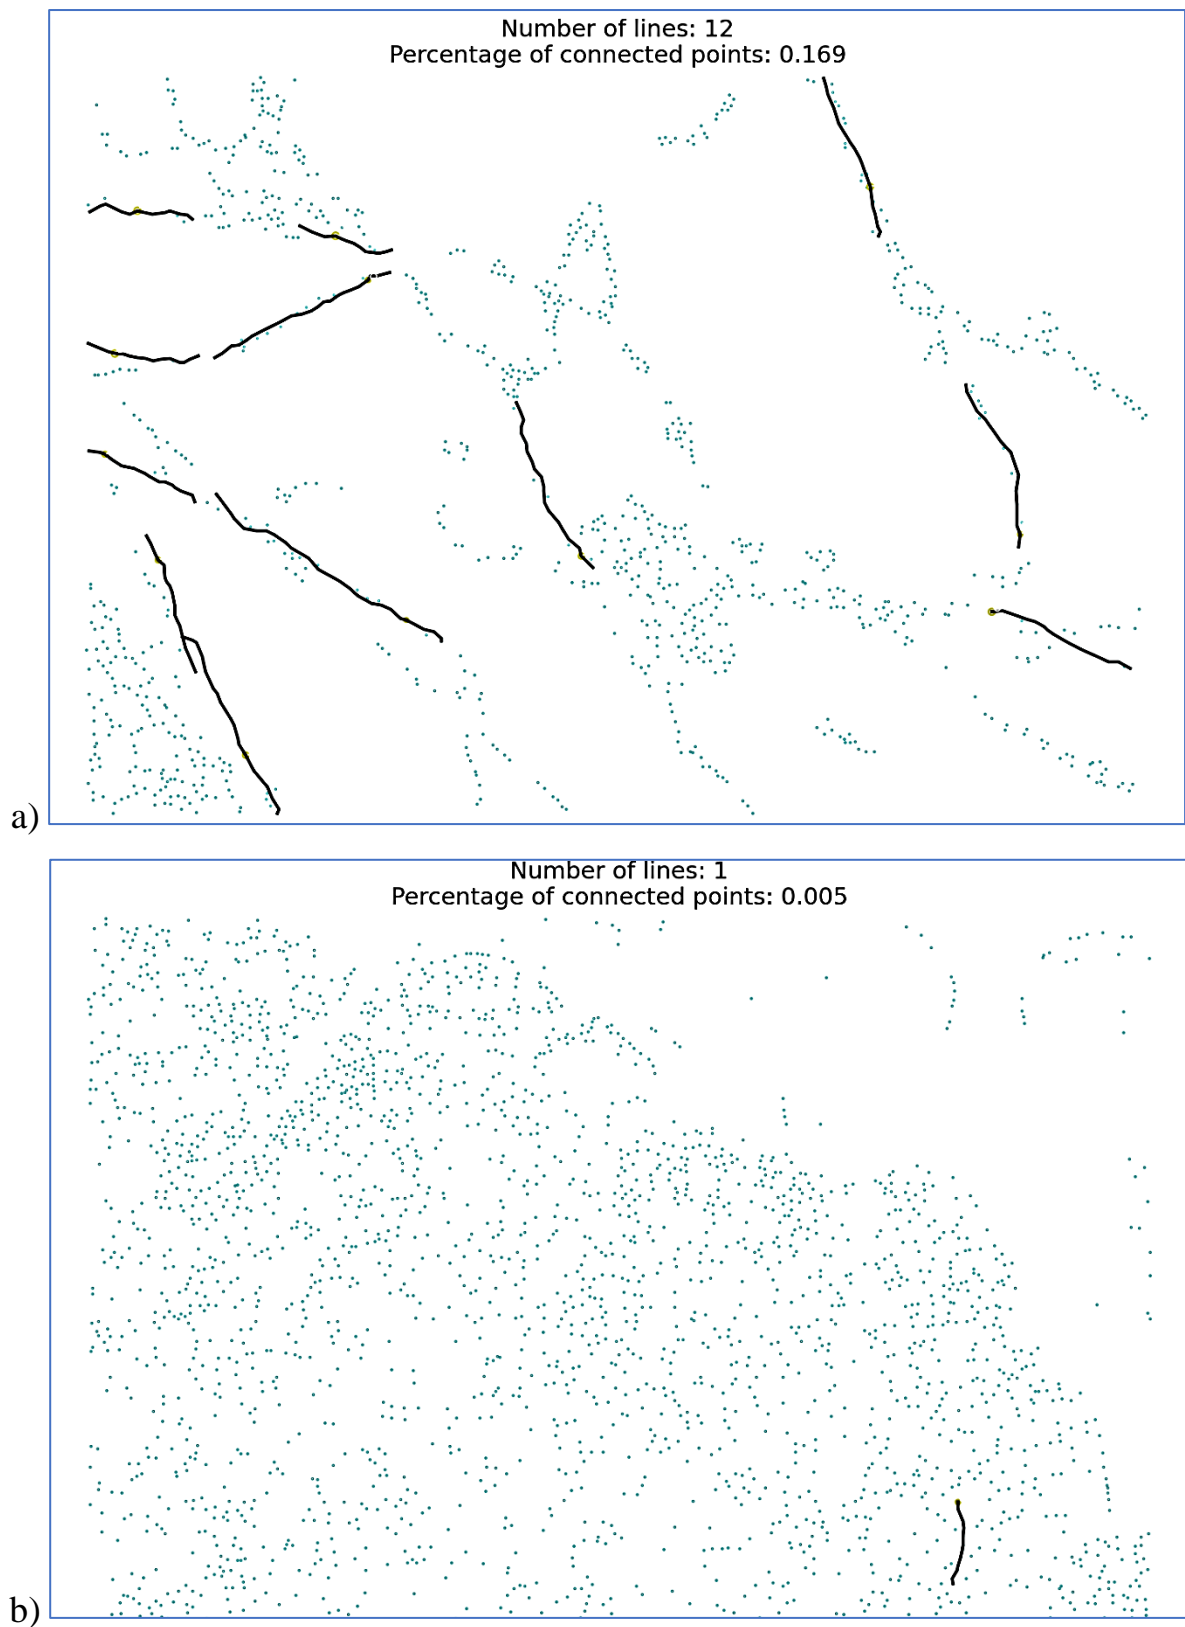

Figure 23 – Results of constructing lines for the proportionality coefficient of the proposed metric of prevailing directions  $C = 0.015$ . The arrangement of the particles in the SEM image: a) ordered (S1-42); b) disordered (S3-157)



Figure 24 shows the results of constructing lines for the proportionality coefficient of the proposed metric of prevailing directions  $C = 0.02$ . The other parameters are unchanged.

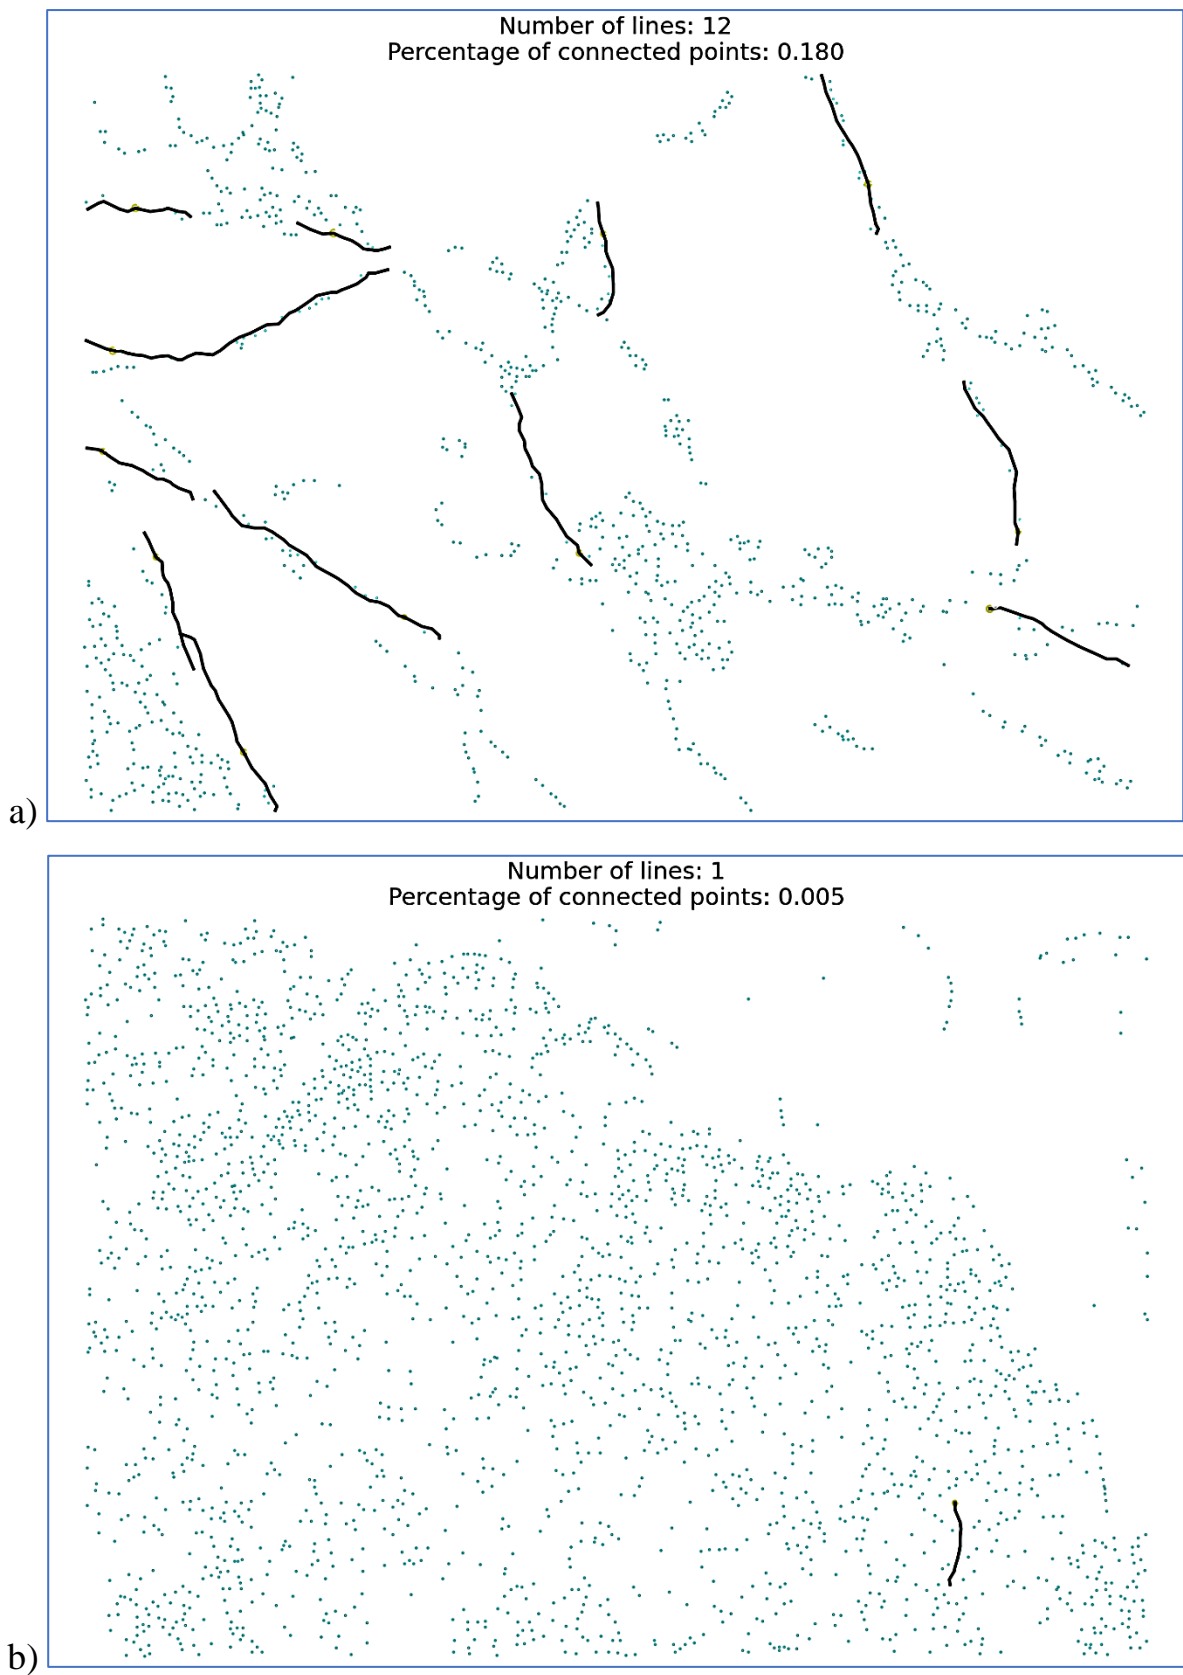

Figure 24 – Results of constructing lines for the proportionality coefficient of the proposed metric of prevailing directions  $C = 0.02$ . The arrangement of the particles in the SEM image:  
a) ordered (S1-42); b) disordered (S3-157)



Figure 25 shows the results of constructing lines for the proportionality coefficient of the proposed metric of prevailing directions  $C = 0.0225$ . The other parameters are unchanged.

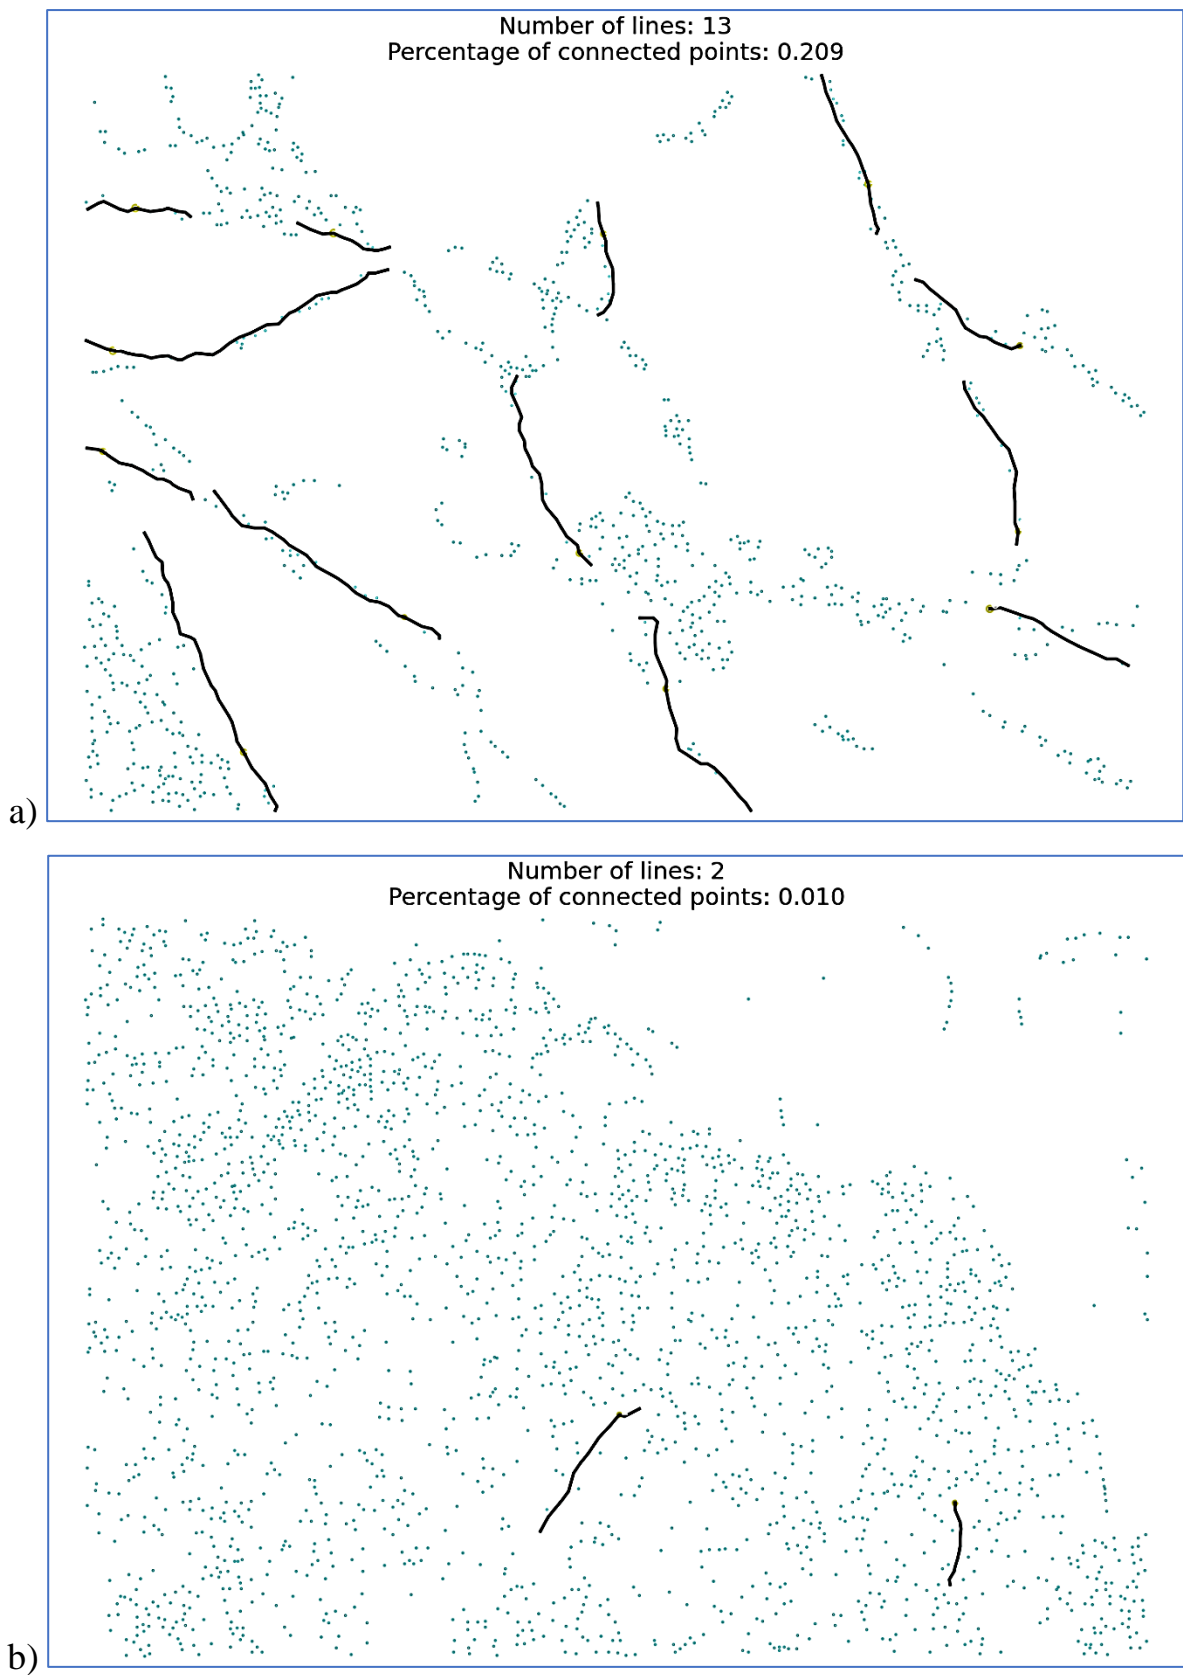

Figure 25 – Results of constructing lines for the proportionality coefficient of the proposed metric of prevailing directions  $C = 0.0225$ . The arrangement of the particles in the SEM image: a) ordered (S1-42); b) disordered (S3-157)

Figure 26 shows the results of constructing lines for the proportionality coefficient of the proposed metric of prevailing directions  $C = 0.0275$ . The other parameters are unchanged.

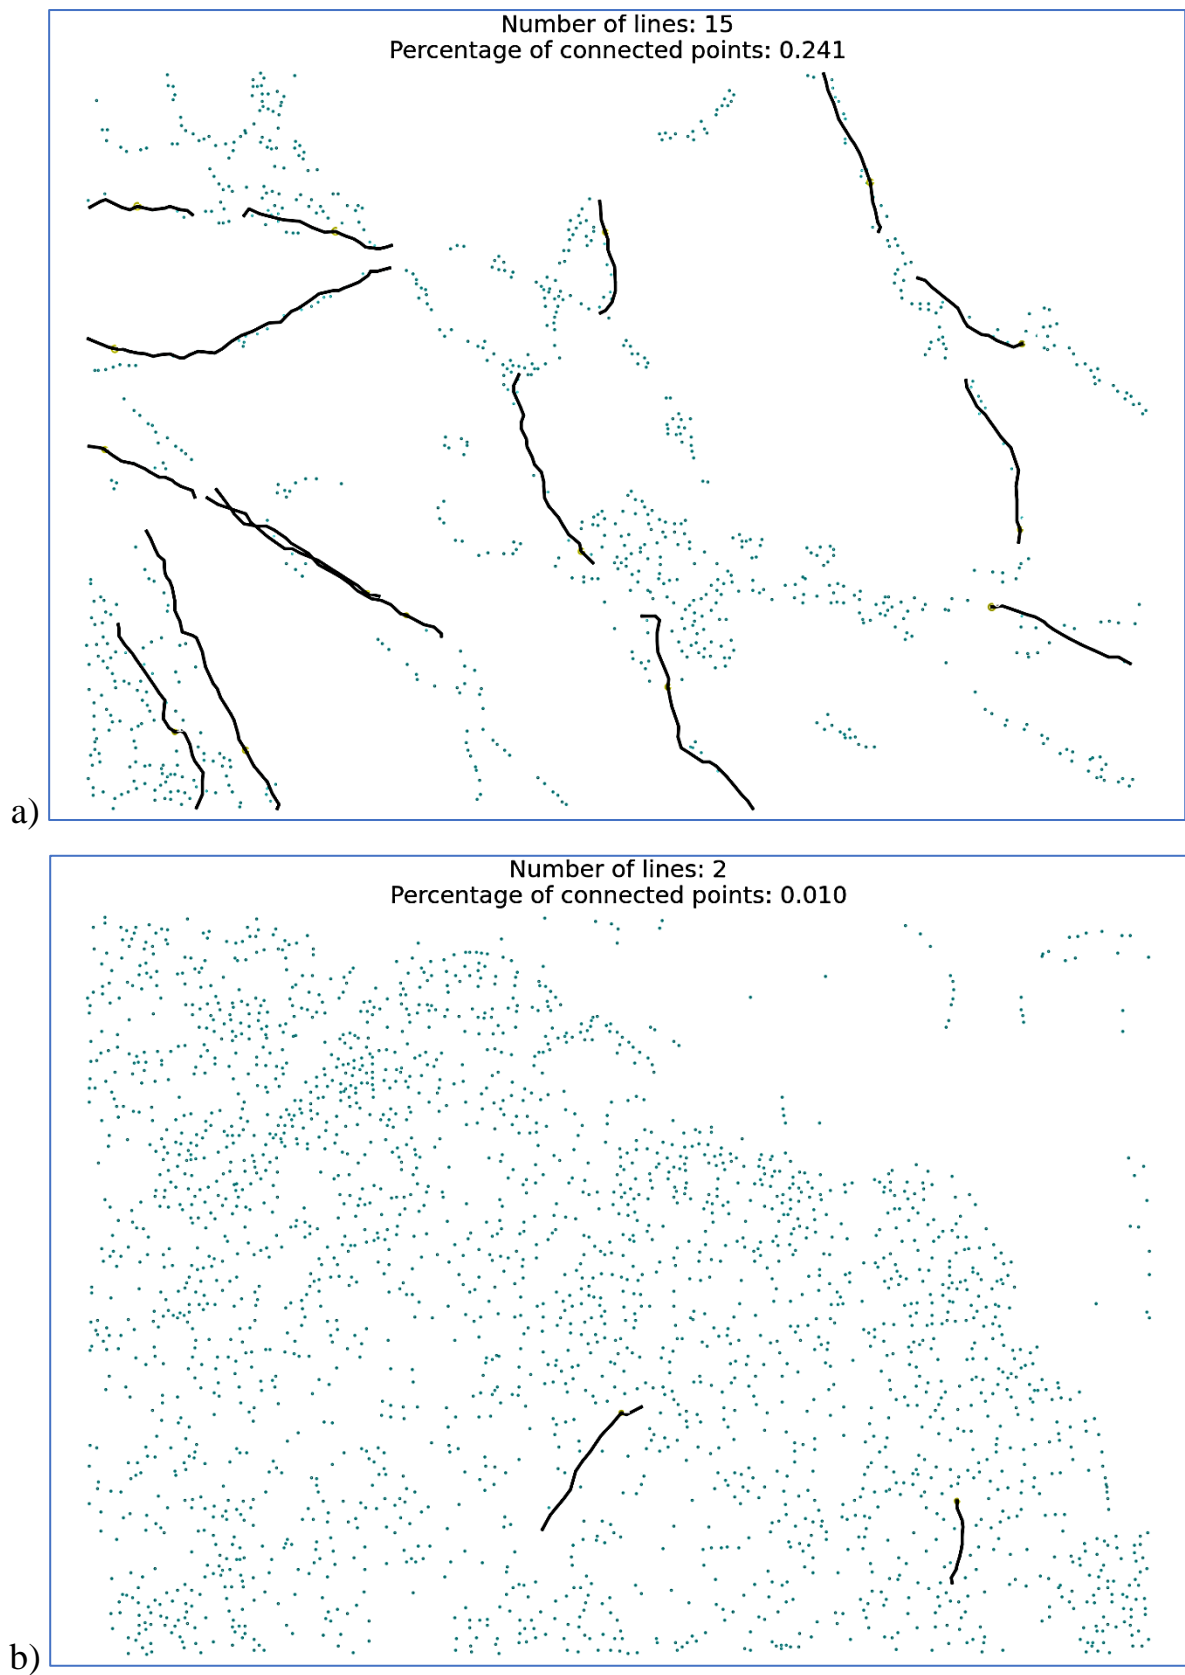

Figure 26 – Results of constructing lines for the proportionality coefficient of the proposed metric of prevailing directions  $C = 0.0275$ . The arrangement of the particles in the SEM image:  
a) ordered (S1-42); b) disordered (S3-157)

Figure 27 shows the results of constructing lines for the proportionality coefficient of the proposed metric of prevailing directions  $C = 0.03$ . The other parameters are unchanged.

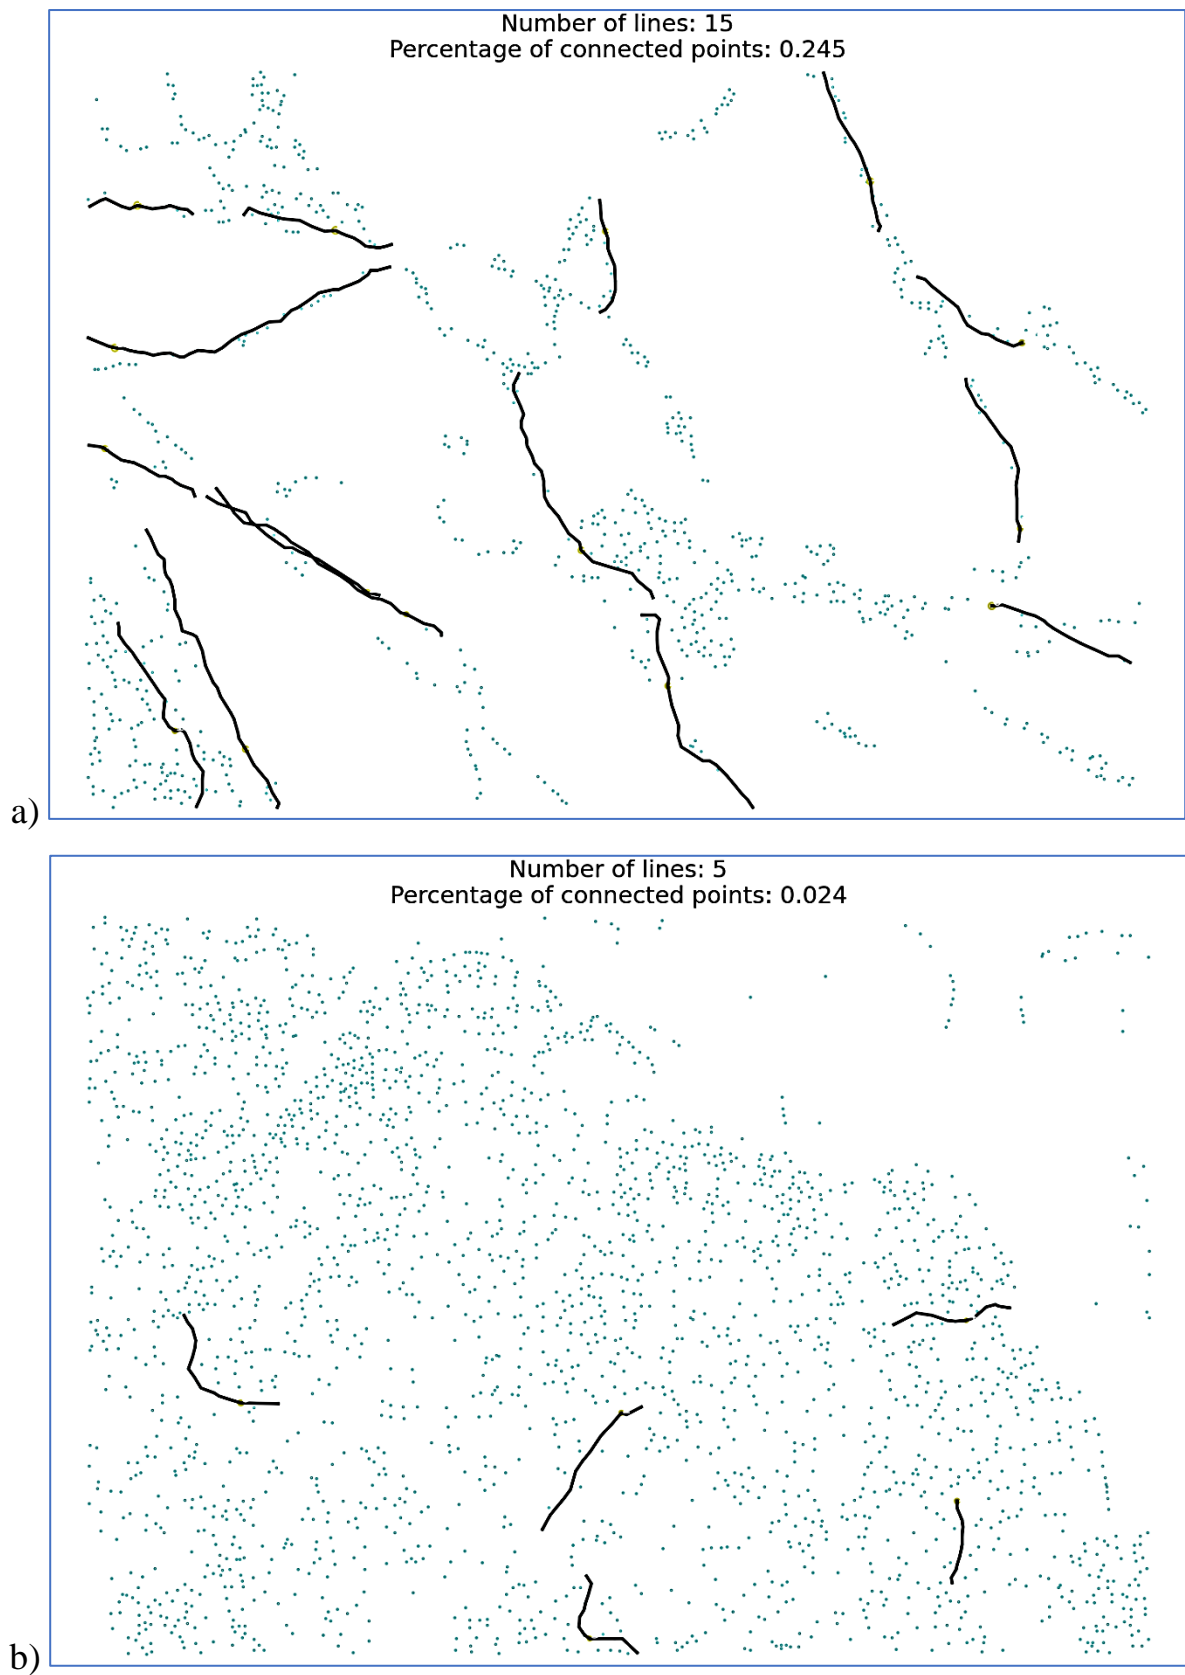

Figure 27 – Results of constructing lines for the proportionality coefficient of the proposed metric of prevailing directions  $C = 0.03$ . The arrangement of the particles in the SEM image:  
a) ordered (S1-42); b) disordered (S3-157)

Figure 28 shows the results of constructing lines for the proportionality coefficient of the proposed metric of prevailing directions  $C = 0.035$ . The other parameters are unchanged.

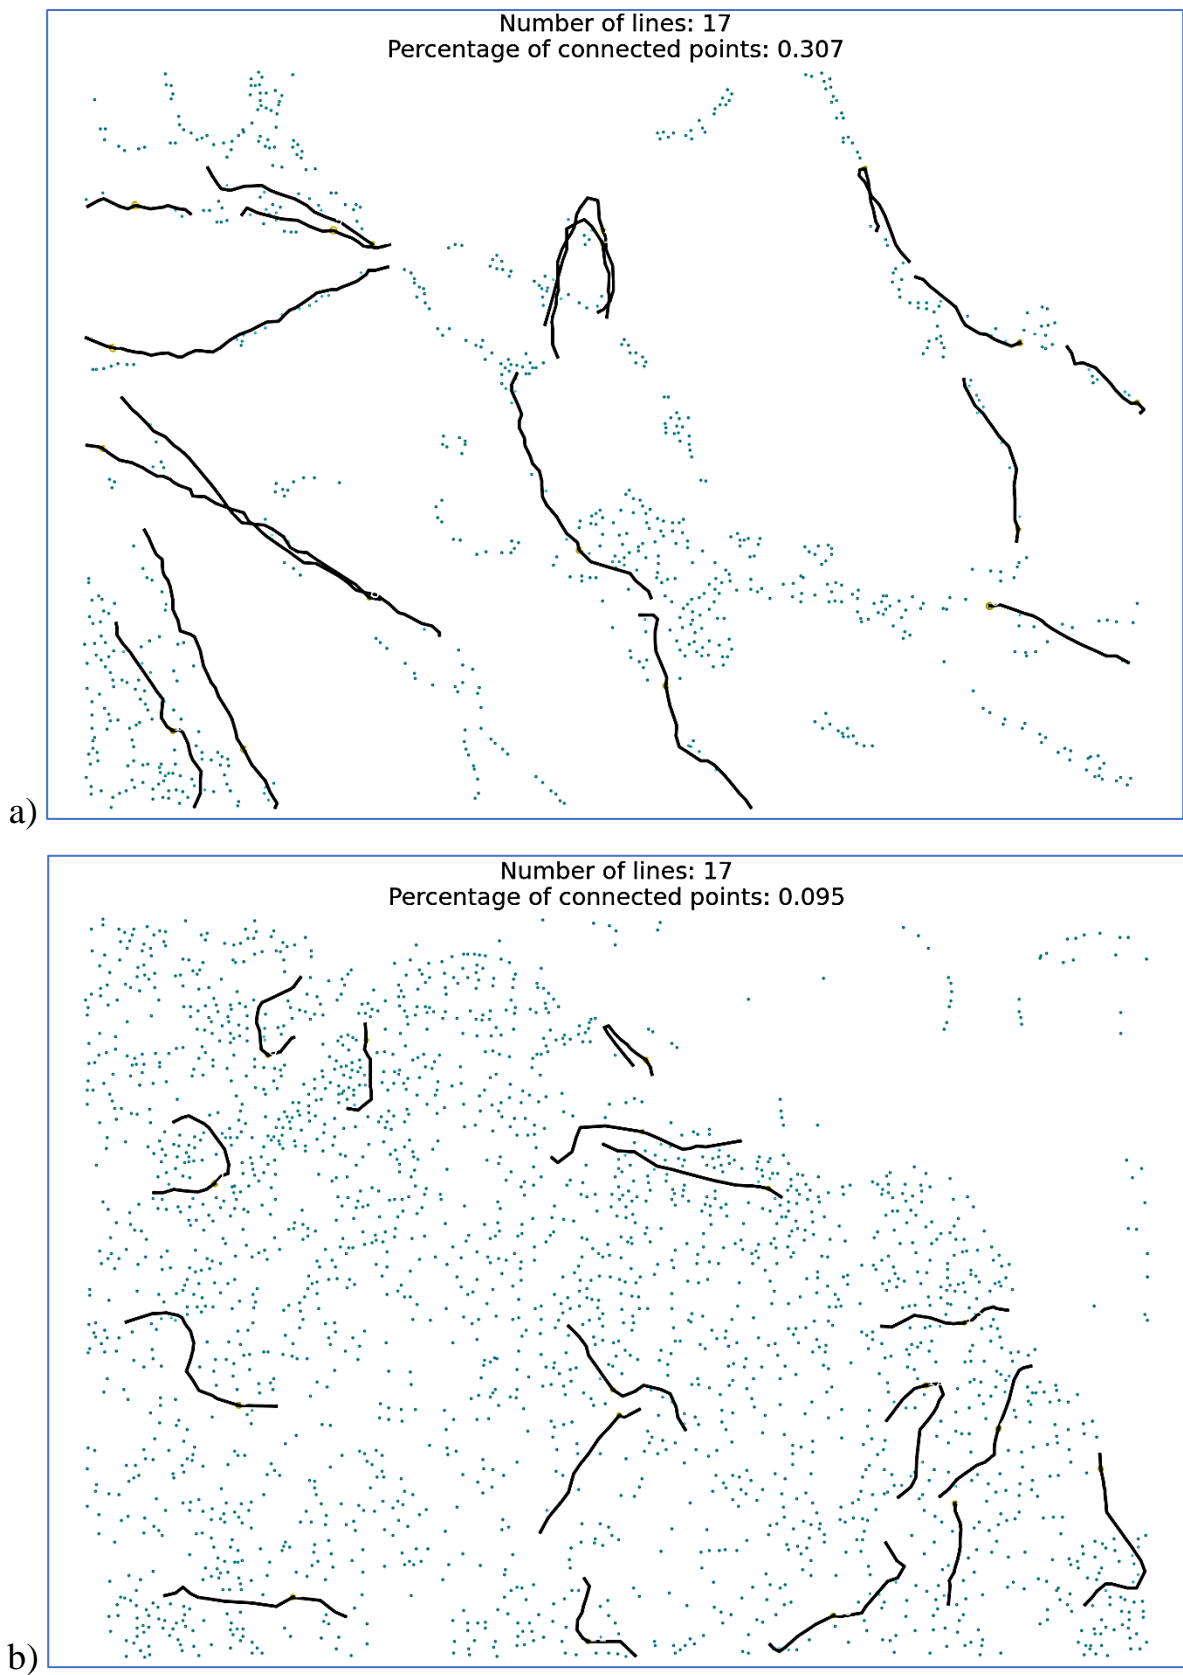

Figure 28 – Results of constructing lines for the proportionality coefficient of the proposed metric of prevailing directions  $C = 0.035$ . The arrangement of the particles in the SEM image:  
a) ordered (S1-42); b) disordered (S3-157)

Figure 29 shows the results of constructing lines for the weight coefficient of the angular coaxiality in the metric of prevailing directions to ensure line smoothness  $w_{coax} = 1.0$ . The other parameters are unchanged.

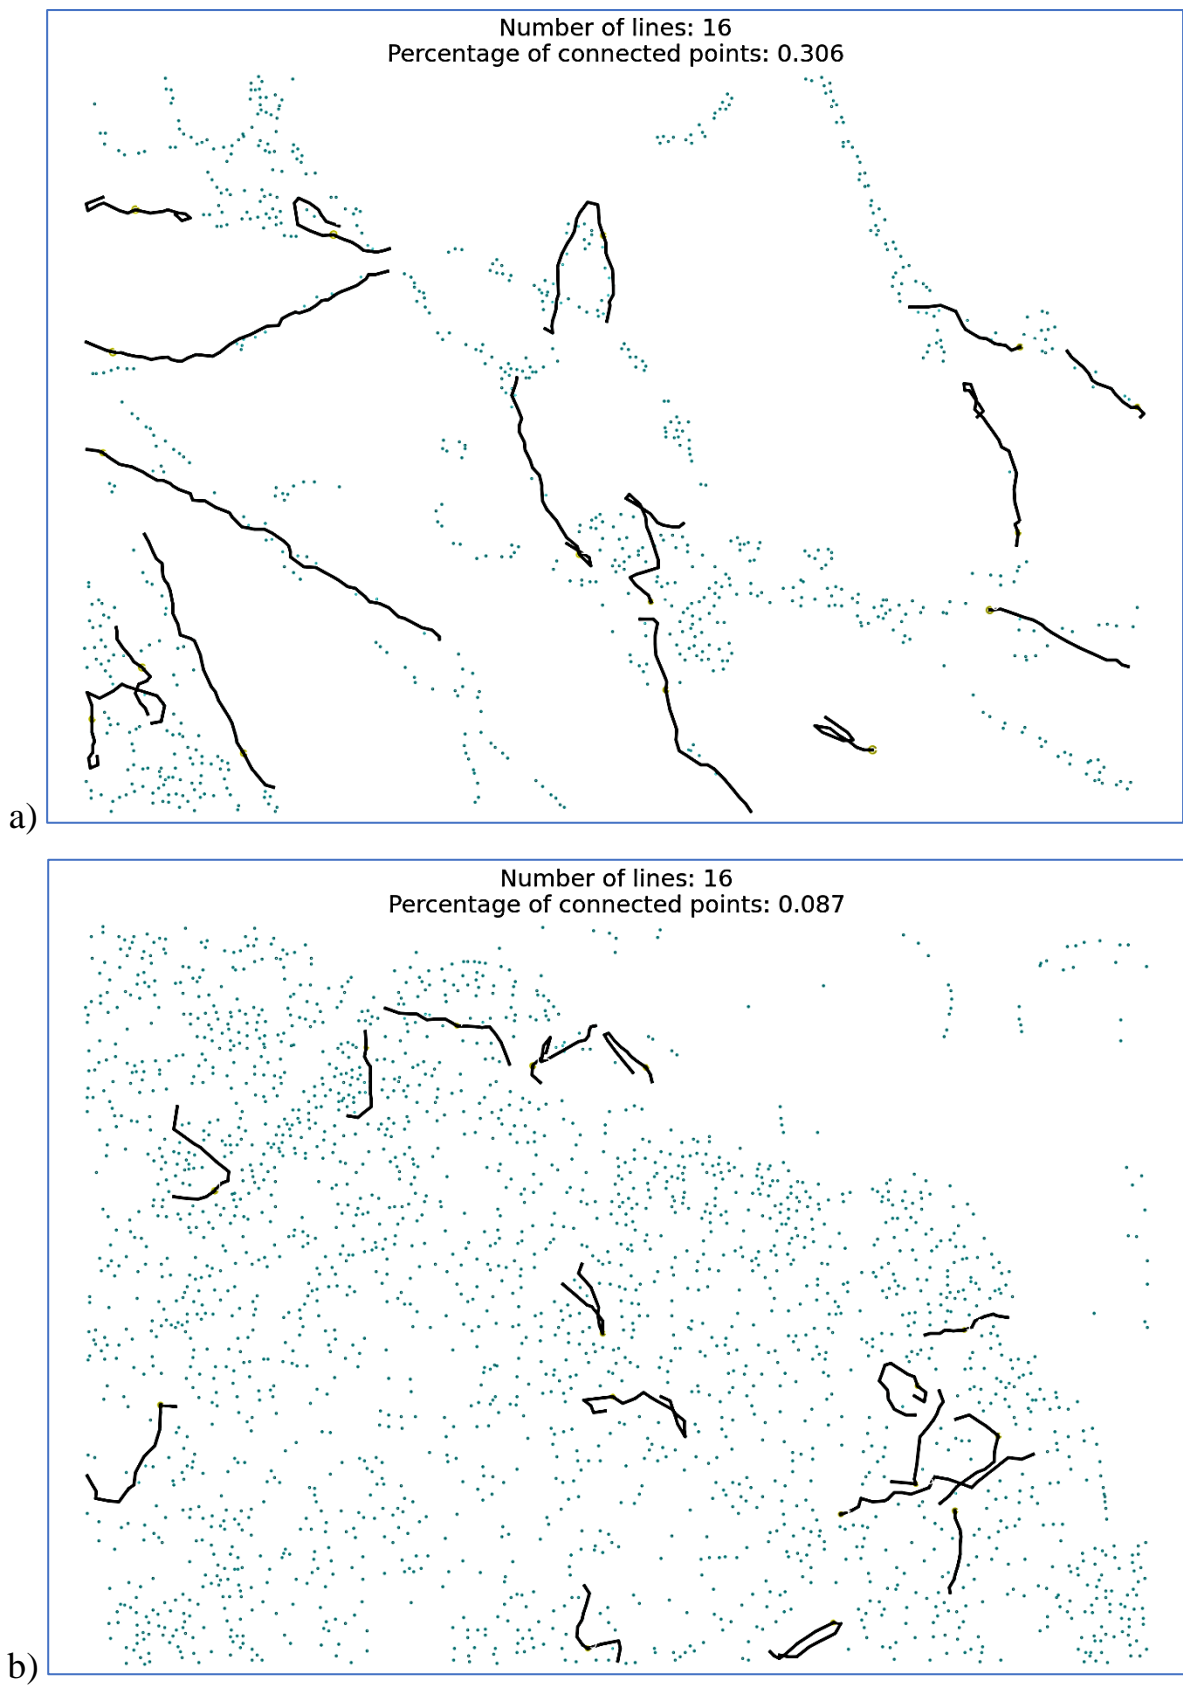

Figure 29 – Results of constructing lines for the weight coefficient of the angular coaxiality in the metric of prevailing directions to ensure line smoothness  $w_{coax} = 1.0$ . The arrangement of the particles in the SEM image: a) ordered (S1-42); b) disordered (S3-157)

Figure 30 shows the results of constructing lines for the weight coefficient of the angular coaxiality in the metric of prevailing directions to ensure line smoothness  $w_{coax} = 1.25$ . The other parameters are unchanged.

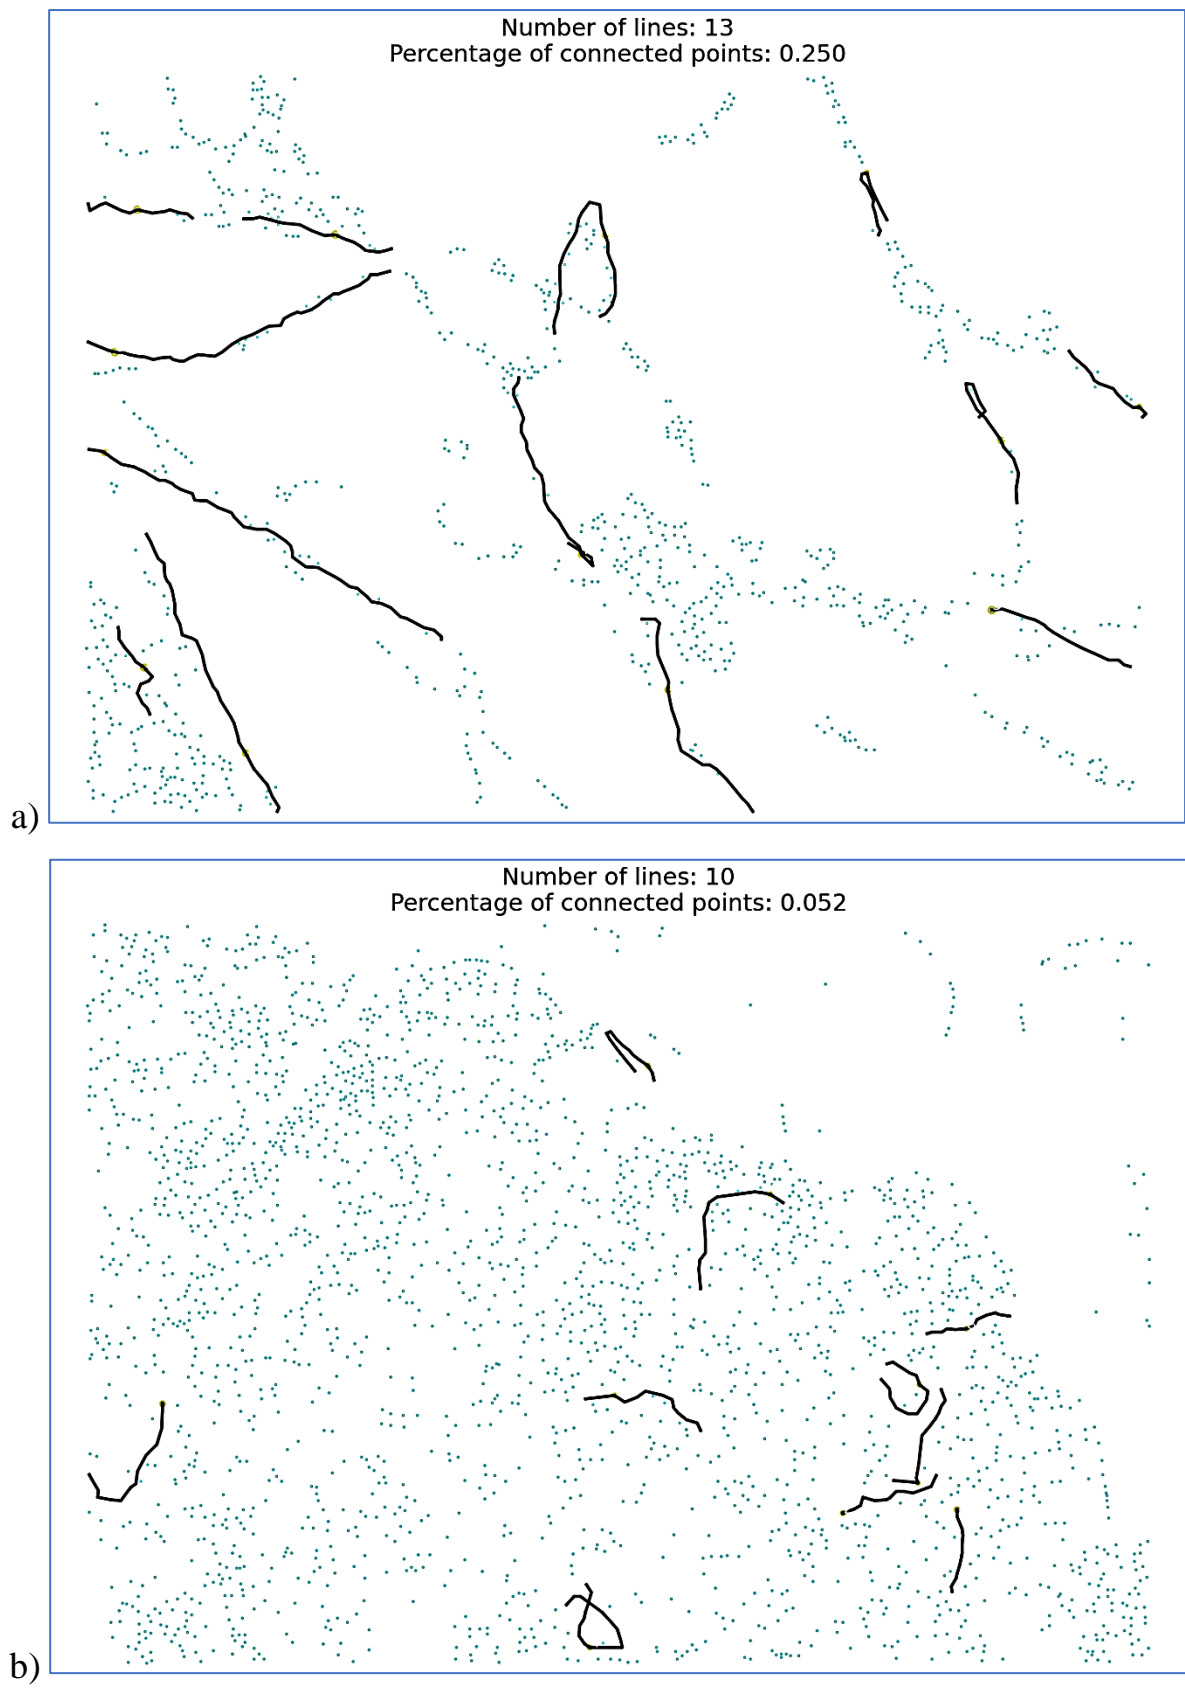

Figure 30 – Results of constructing lines for the weight coefficient of the angular coaxiality in the metric of prevailing directions to ensure line smoothness  $w_{coax} = 1.25$ . The arrangement of the particles in the SEM image: a) ordered (S1-42); b) disordered (S3-157)

Figure 31 shows the results of constructing lines for the weight coefficient of the angular coaxiality in the metric of prevailing directions to ensure line smoothness  $w_{coax} = 1.5$ . The other parameters are unchanged.

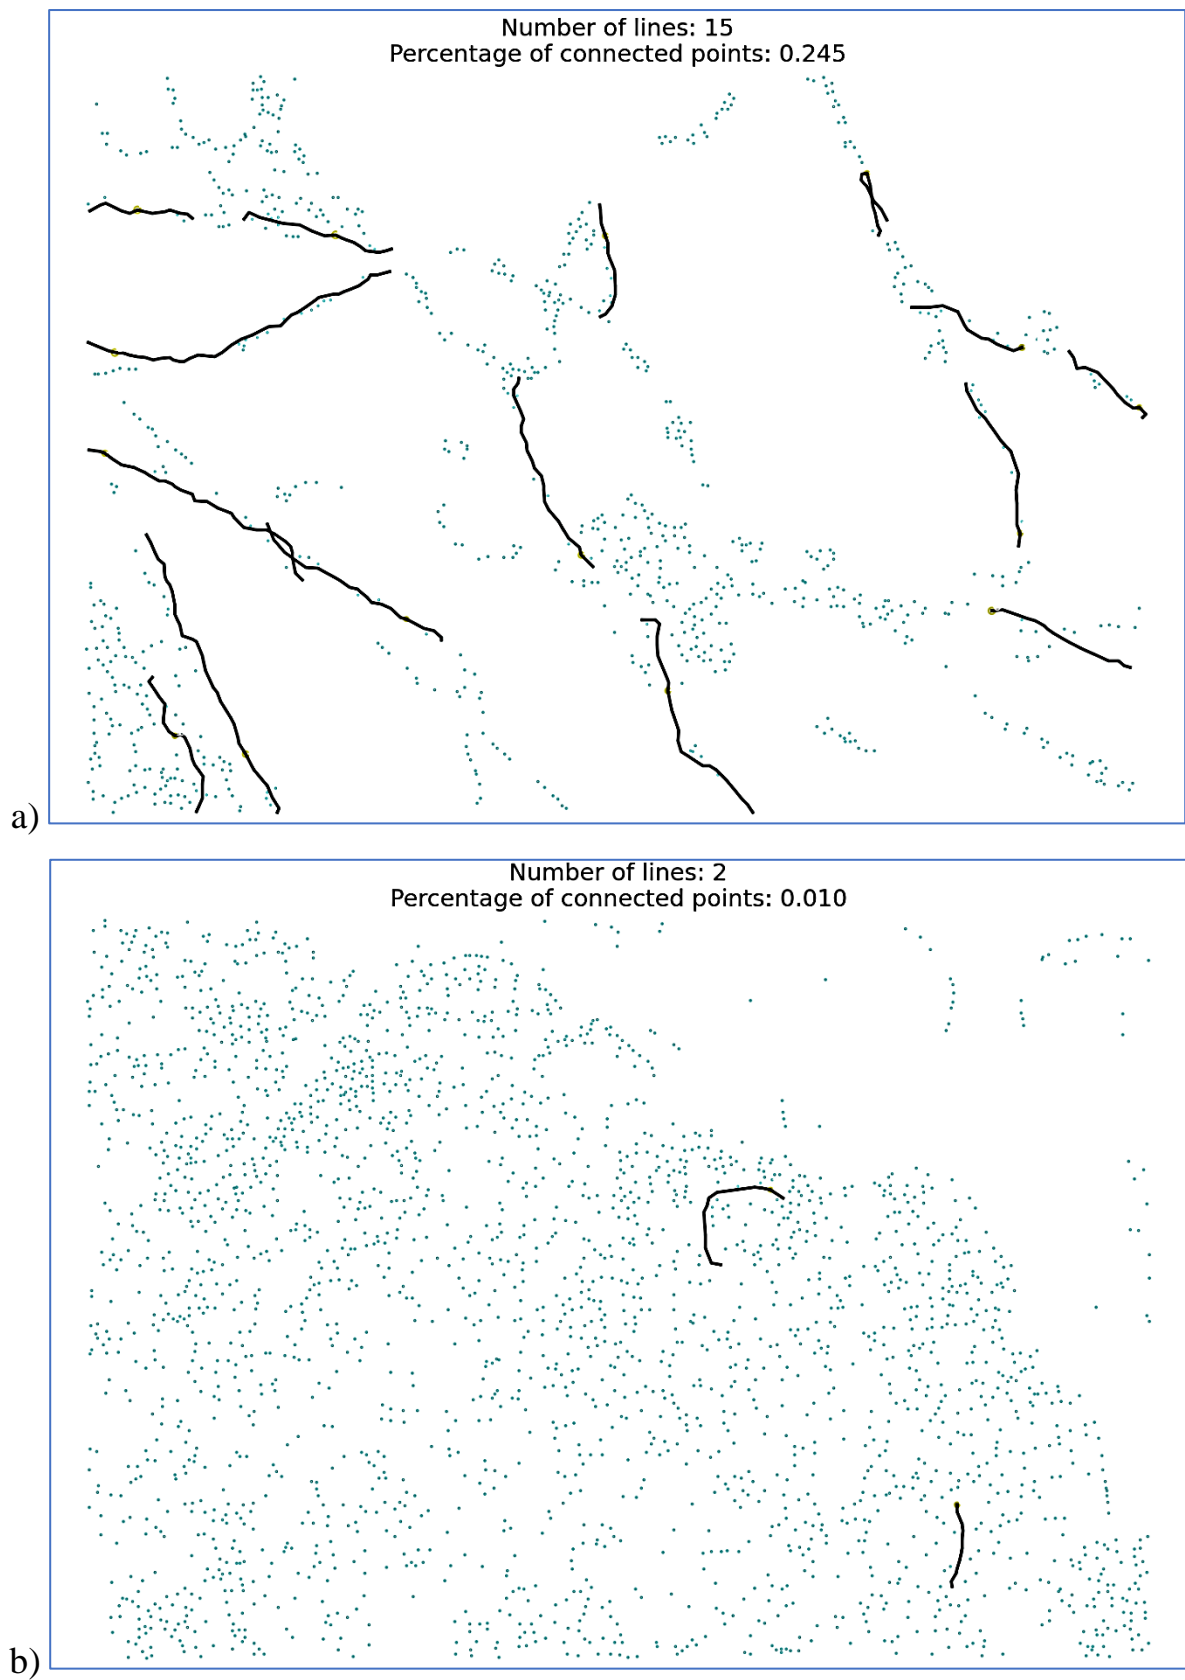

Figure 31 – Results of constructing lines for the weight coefficient of the angular coaxiality in the metric of prevailing directions to ensure line smoothness  $w_{coax} = 1.5$ . The arrangement of the particles in the SEM image: a) ordered (S1-42); b) disordered (S3-157)



Figure 32 shows the results of constructing lines for the weight coefficient of the angular coaxiality in the metric of prevailing directions to ensure line smoothness  $w_{coax} = 2.0$ . The other parameters are unchanged.

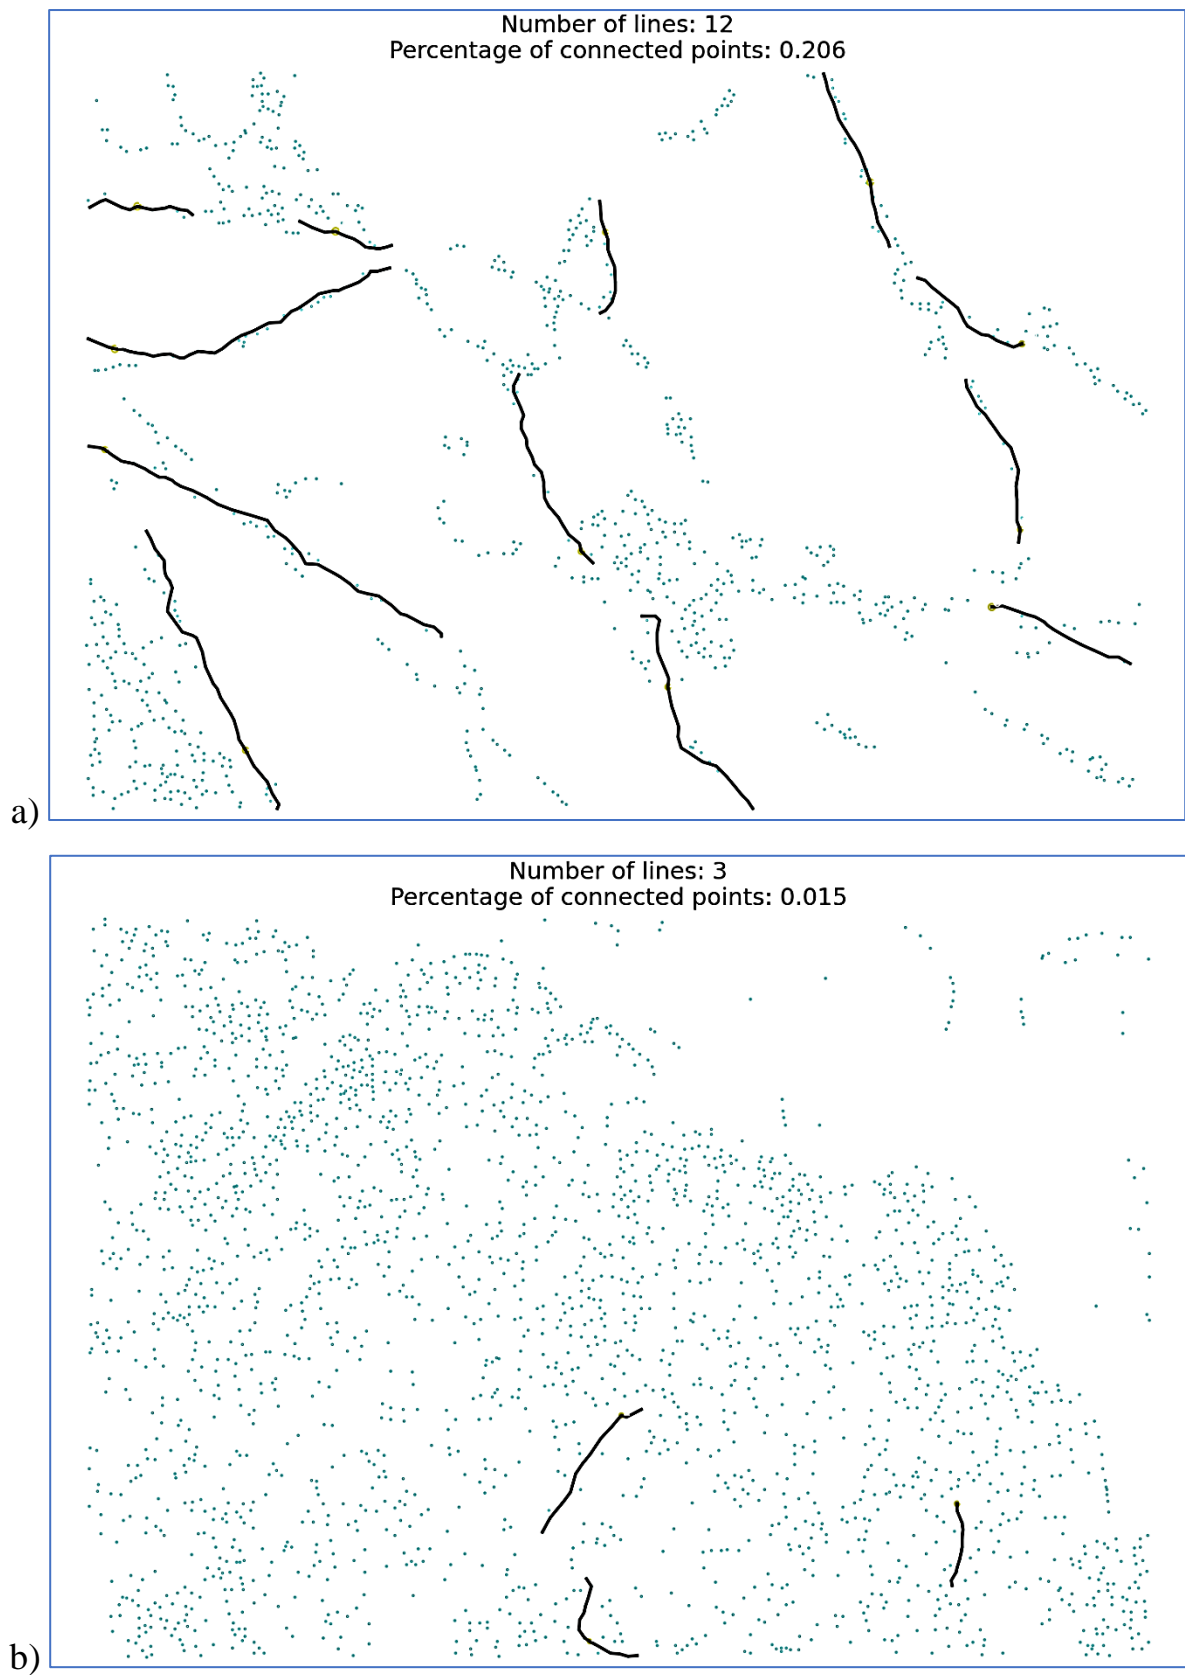

Figure 32 – Results of constructing lines for the weight coefficient of the angular coaxiality in the metric of prevailing directions to ensure line smoothness  $w_{coax} = 2.0$ . The arrangement of the particles in the SEM image: a) ordered (S1-42); b) disordered (S3-157)

Figure 33 shows the results of constructing lines for the weight coefficient of the angular coaxiality in the metric of prevailing directions to ensure line smoothness  $w_{coax} = 2.5$ . The other parameters are unchanged.

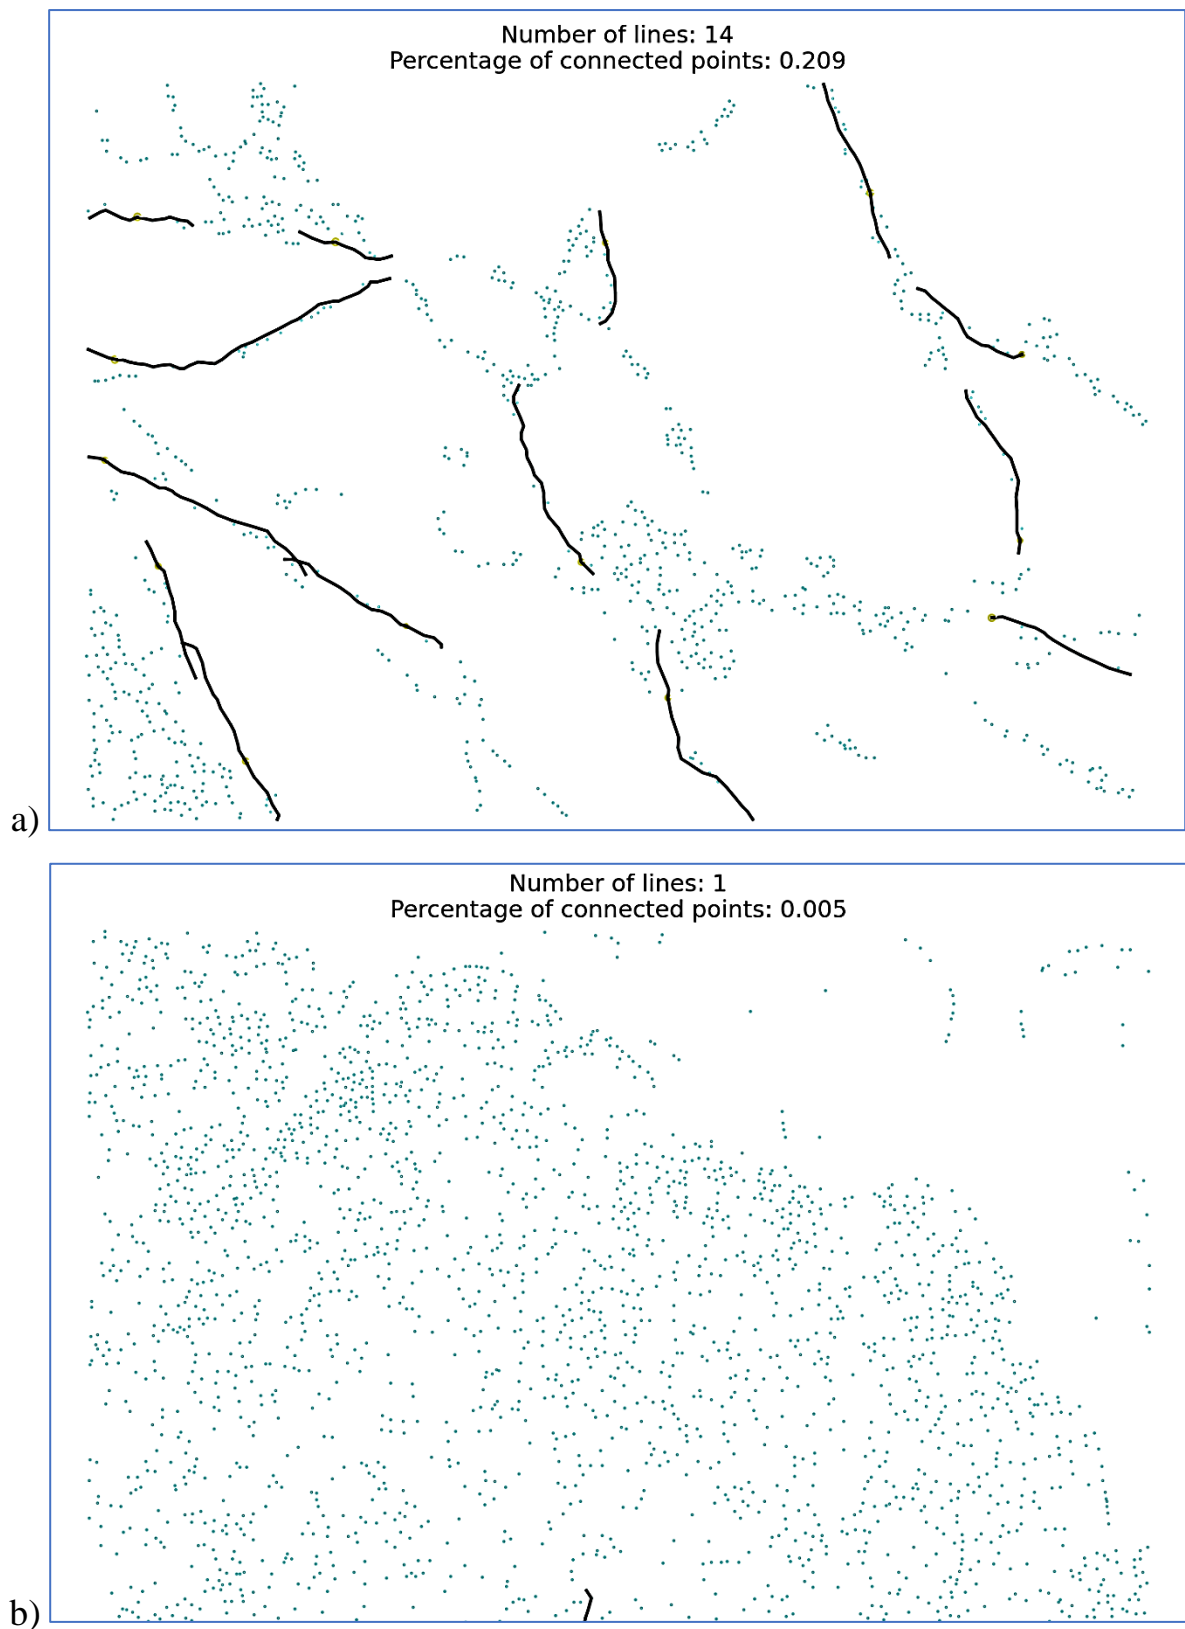

Figure 33 – Results of constructing lines for the weight coefficient of the angular coaxiality in the metric of prevailing directions to ensure line smoothness  $w_{coax} = 2.5$ . The arrangement of the particles in the SEM image: a) ordered (S1-42); b) disordered (S3-157)

Figure 34 shows the results of constructing lines for the weight coefficient of the angular coaxiality in the metric of prevailing directions to ensure line smoothness  $w_{coax} = 3.0$ . The other parameters are unchanged.

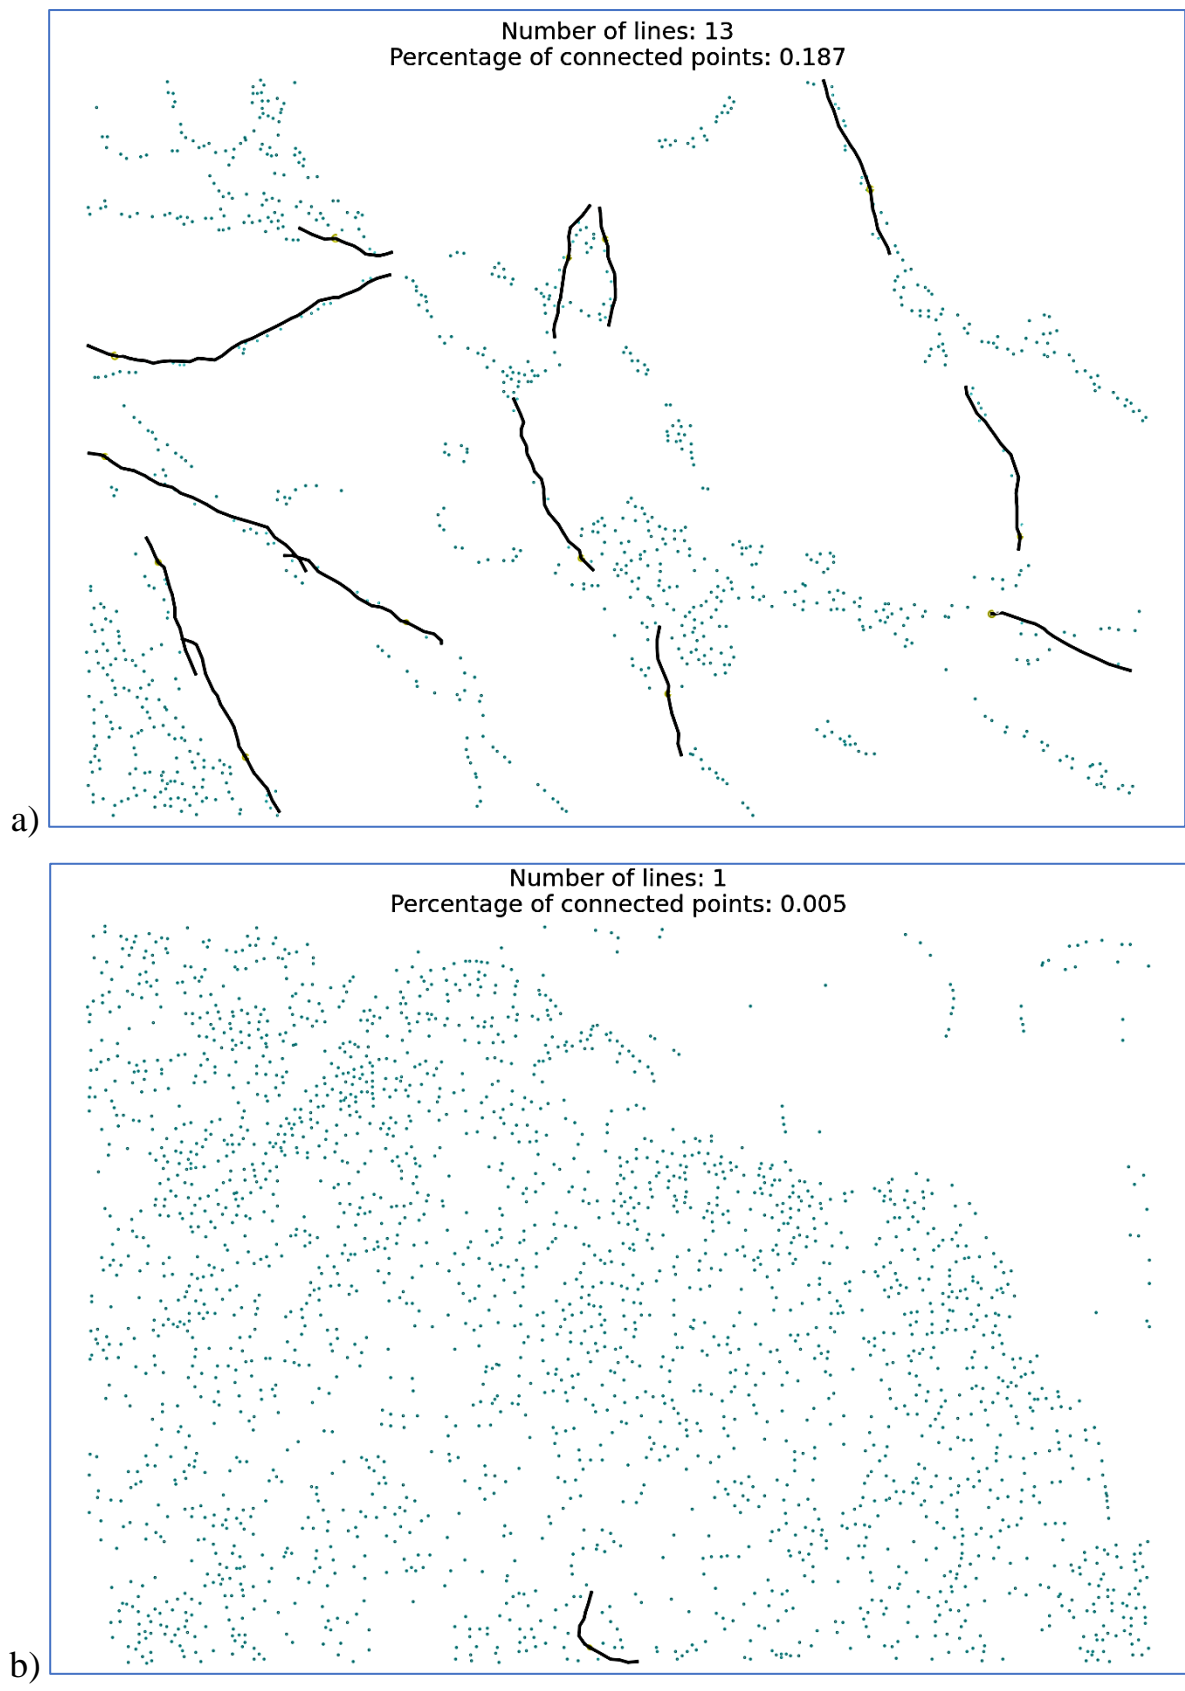

Figure 34 – Results of constructing lines for the weight coefficient of the angular coaxiality in the metric of prevailing directions to ensure line smoothness  $w_{coax} = 3.0$ . The arrangement of the particles in the SEM image: a) ordered (S1-42); b) disordered (S3-157)

Figure 35 shows the results of the constructing lines for the minimum line length in the nanoparticles  $L_{min} = 6$ . The other parameters are unchanged.

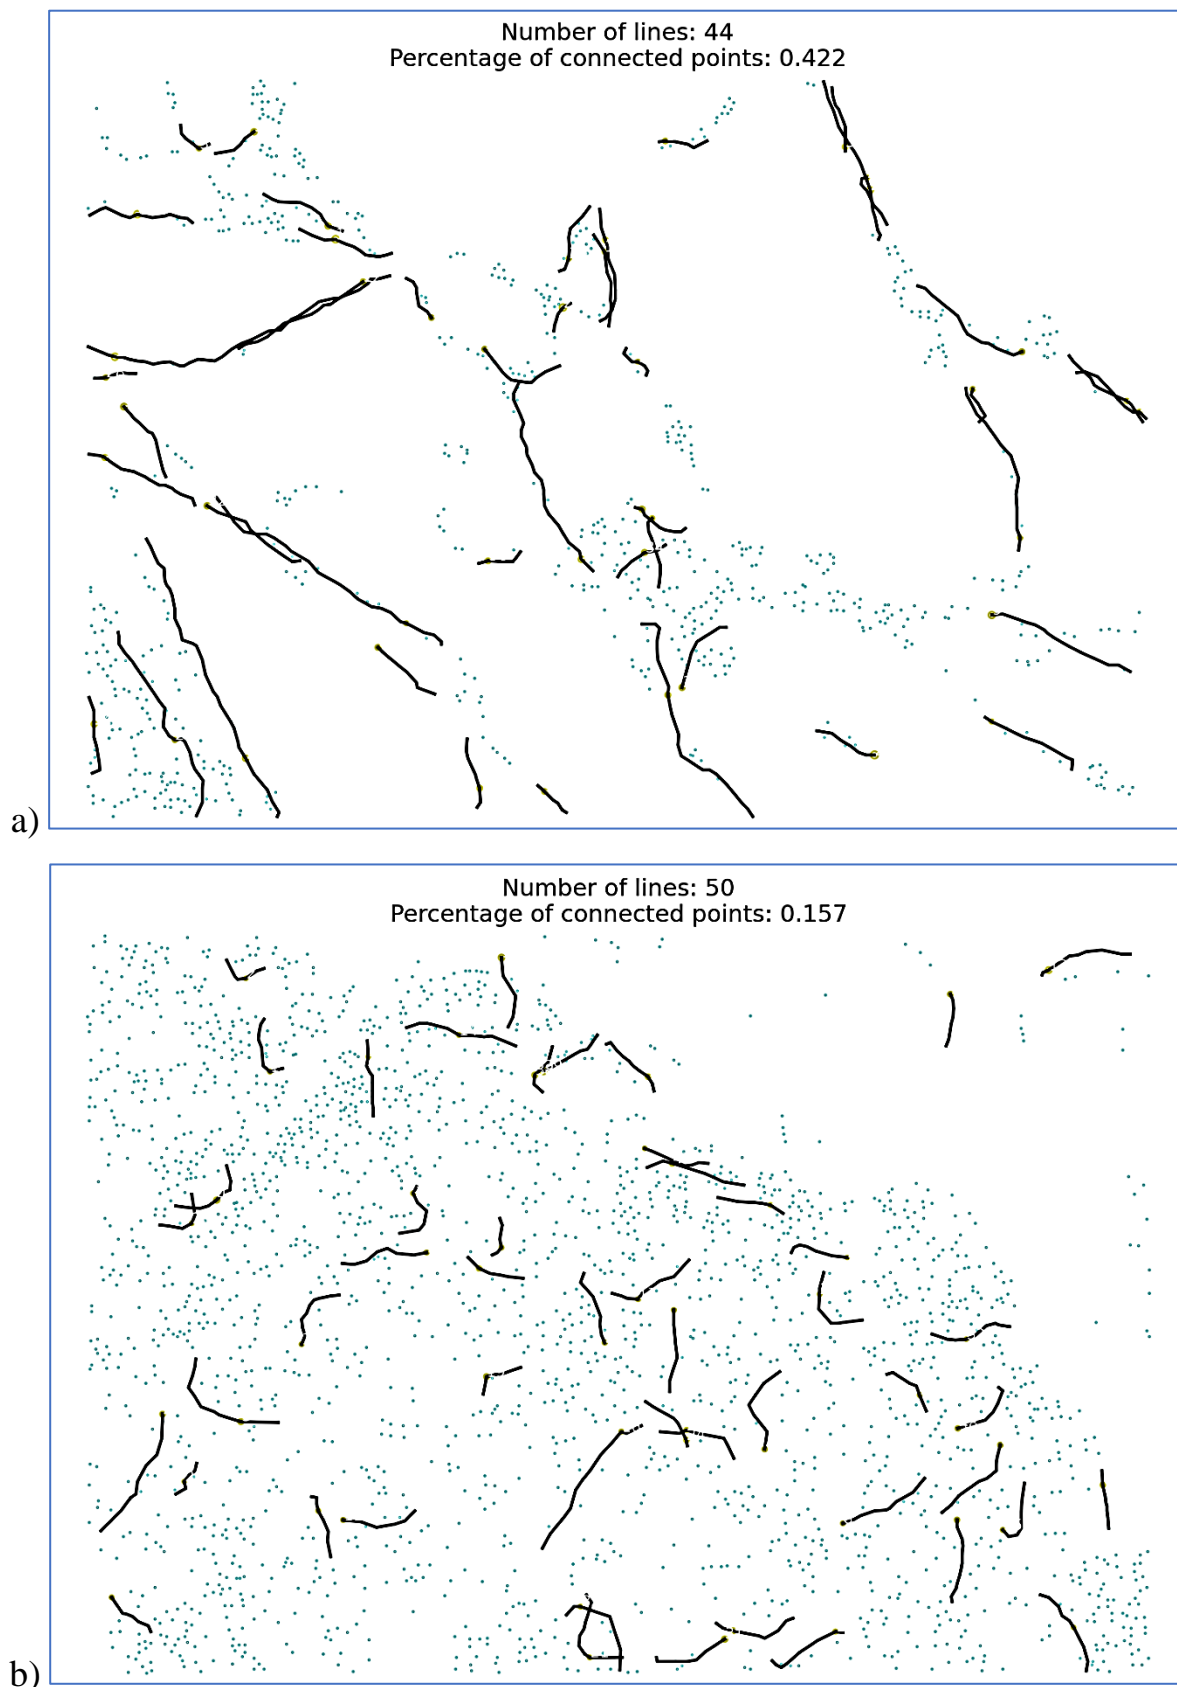

Figure 35 – Results of constructing lines for the minimum line length in the nanoparticles  $L_{min} = 6$ . The arrangement of the particles in the SEM image: a) ordered (S1-42); b) disordered (S3-157)

Figure 36 shows the results of the constructing lines for the minimum line length in the nanoparticles  $L_{min} = 8$ . The other parameters are unchanged.

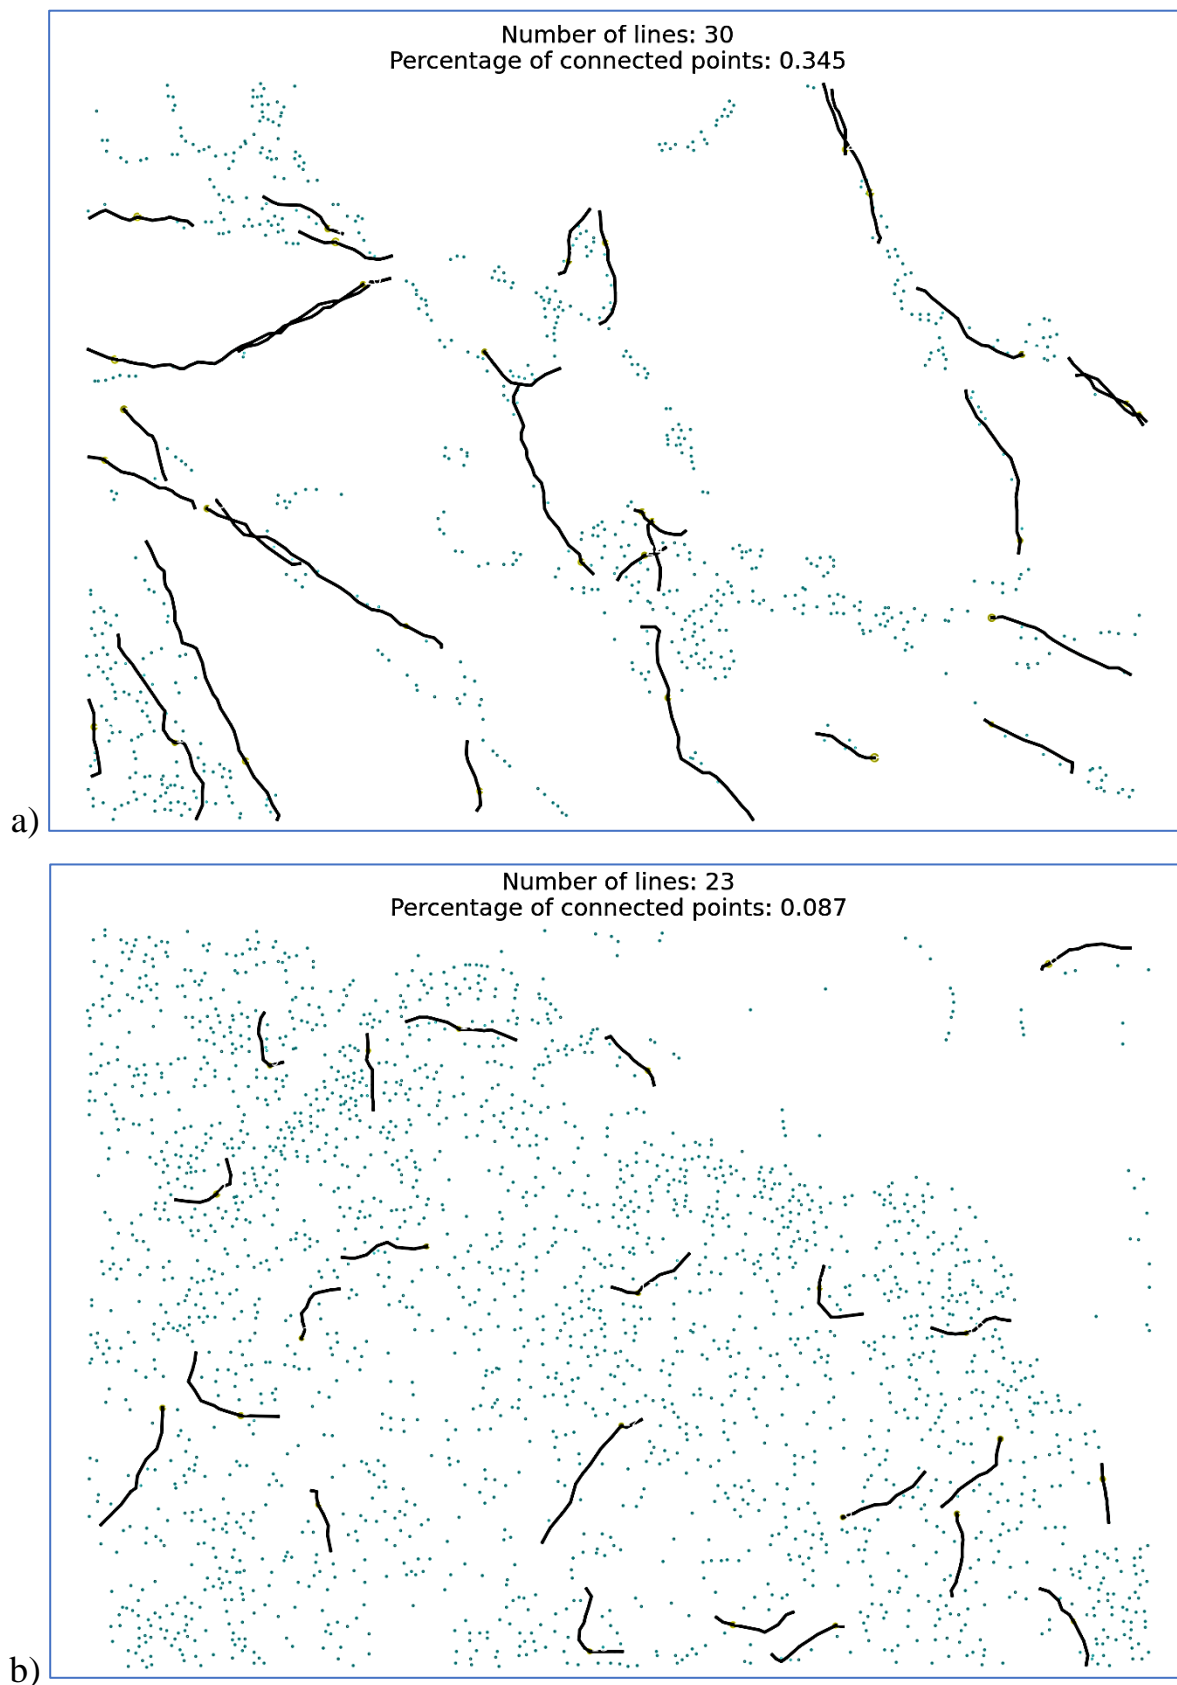

Figure 36 – Results of constructing lines for the minimum line length in the nanoparticles  $L_{min} = 8$ . The arrangement of the particles in the SEM image: a) ordered (S1-42); b) disordered (S3-157)

Figure 37 shows the results of the constructing lines for the minimum line length in the nanoparticles  $L_{min} = 10$ . The other parameters are unchanged.

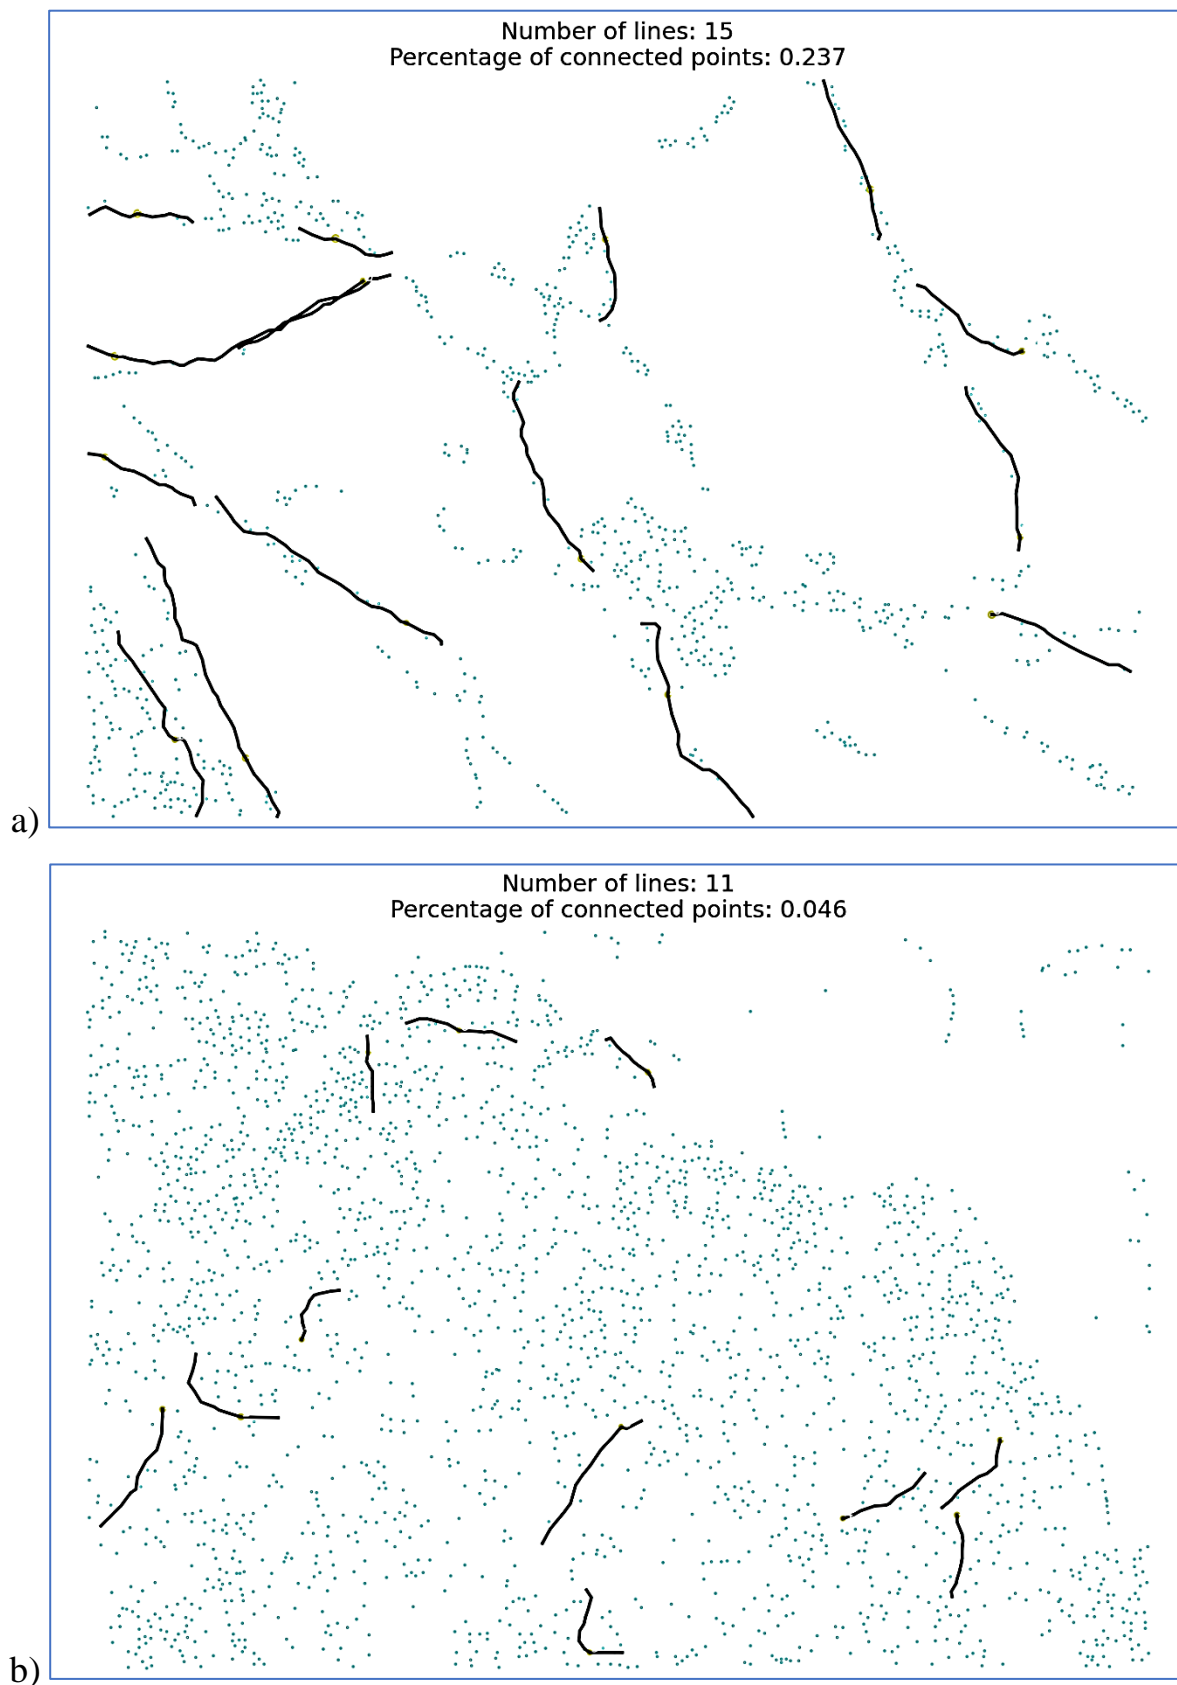

Figure 37 – Results of constructing lines for the minimum line length in the nanoparticles  $L_{min} = 10$ . The arrangement of the particles in the SEM image: a) ordered (S1-42); b) disordered (S3-157)

Figure 38 shows the results of the constructing lines for the minimum line length in the nanoparticles  $L_{min} = 14$ . The other parameters are unchanged.

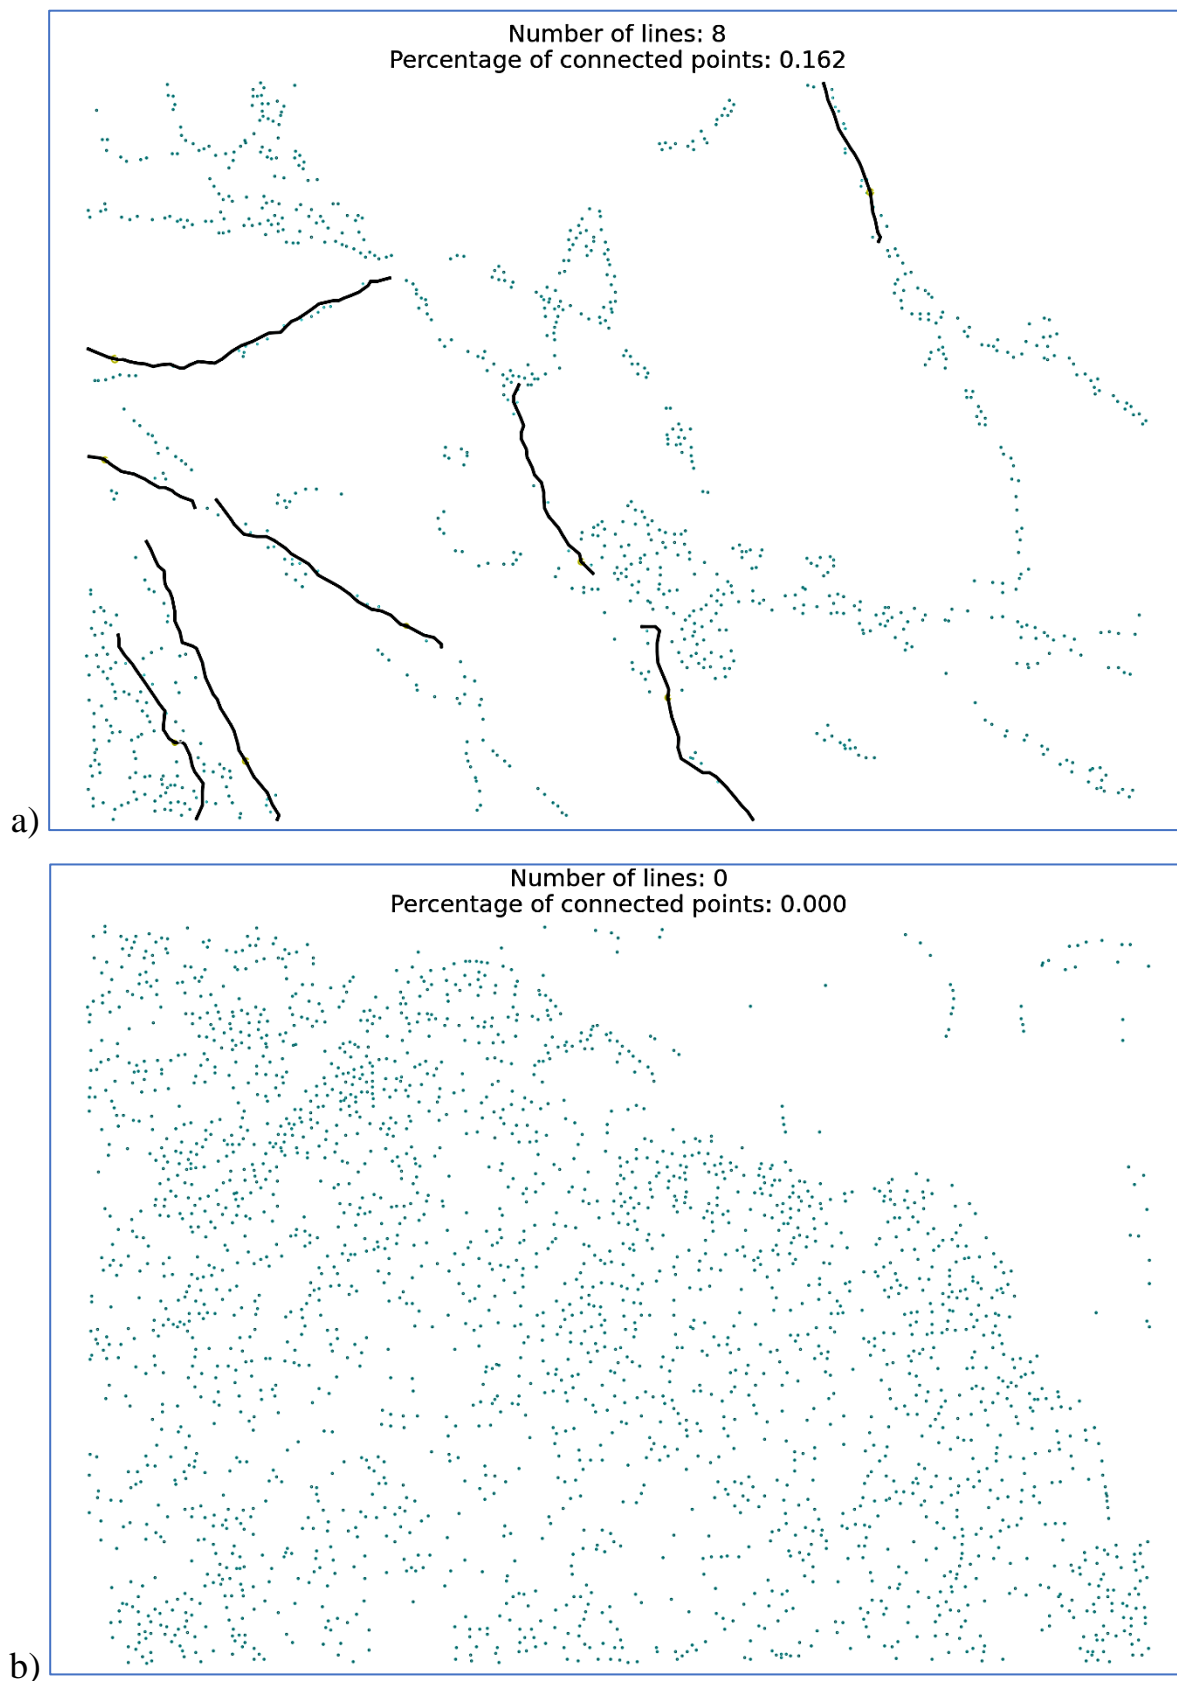

Figure 38 – Results of constructing lines for the minimum line length in the nanoparticles  $L_{min} = 14$ . The arrangement of the particles in the SEM image: a) ordered (S1-42); b) disordered (S3-157)



Figure 39 shows the results of constructing lines for the minimum line length in the nanoparticles  $L_{min} = 16$ . The other parameters are unchanged.

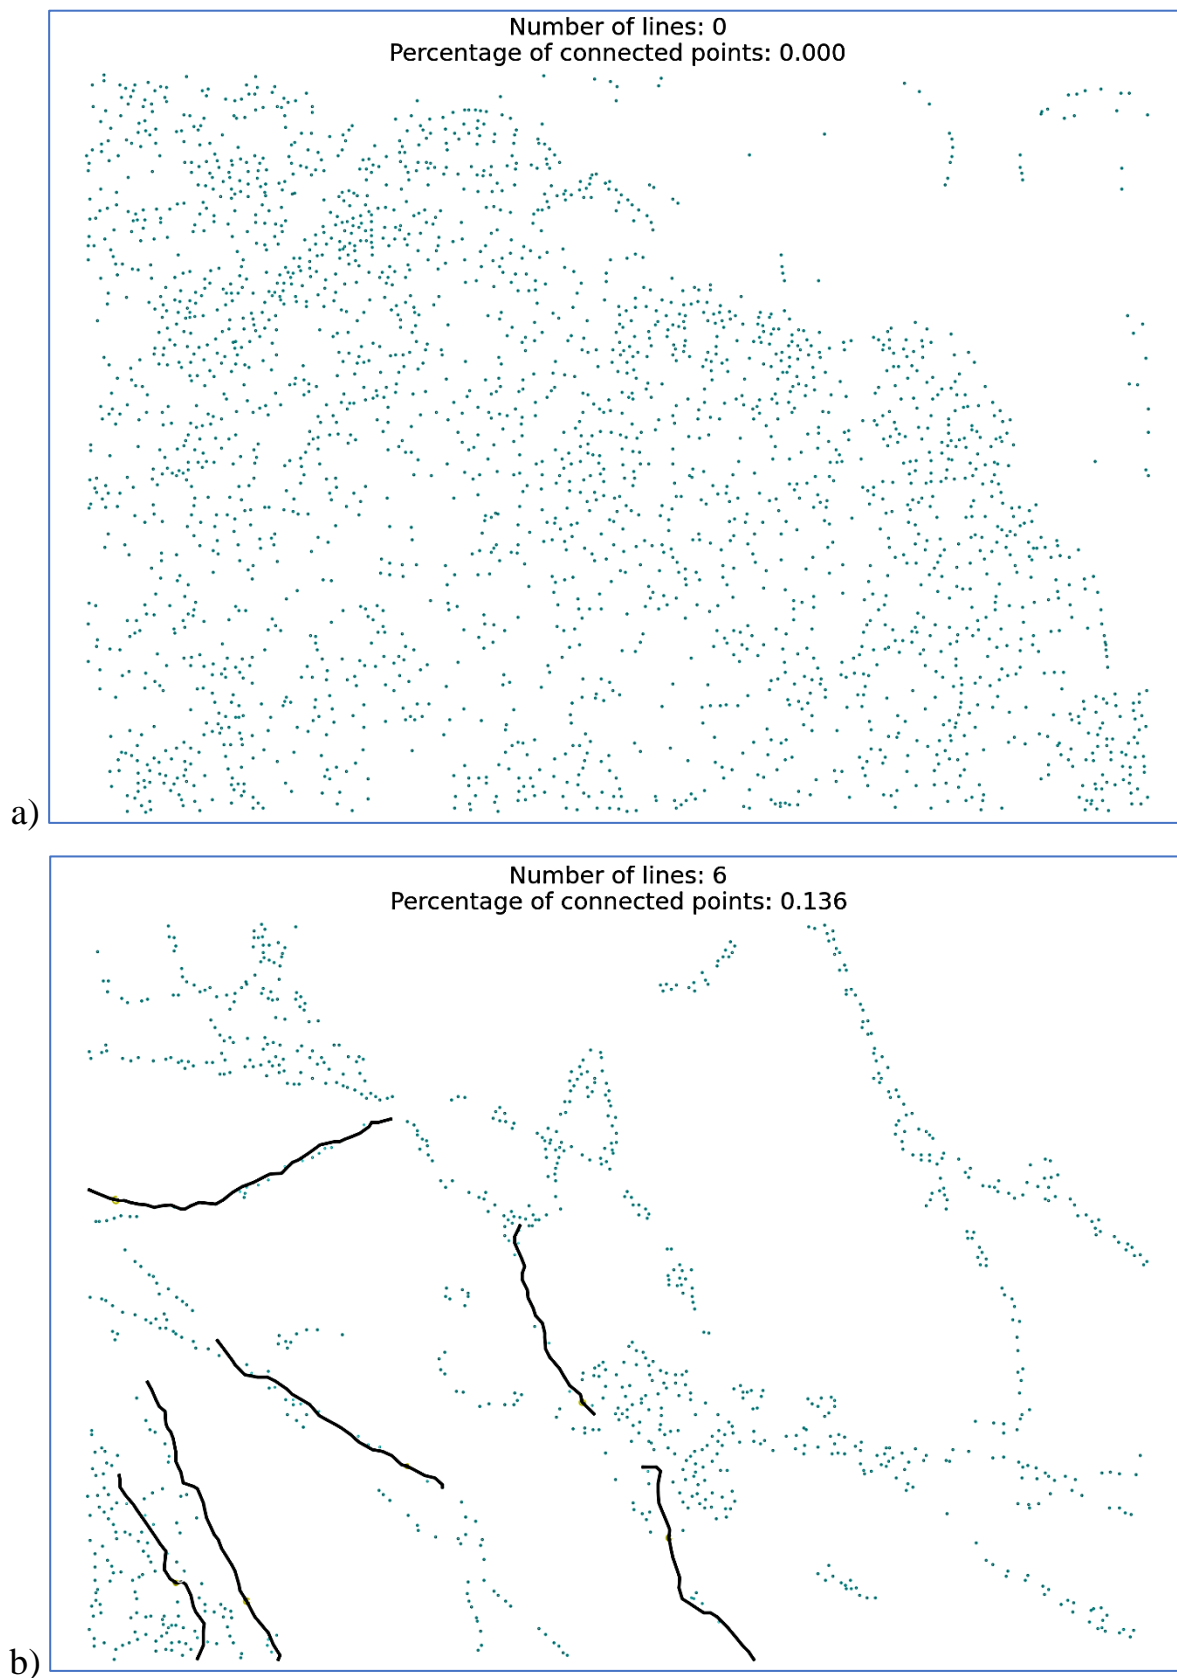

Figure 39 – Results of constructing lines for the minimum line length in the nanoparticles  $L_{min} = 16$ . The arrangement of the particles in the SEM image: a) ordered (S1-42); b) disordered (S3-157)

Figure 40 shows the results of the constructing lines for the minimum line length in the nanoparticles  $L_{min} = 20$ . The other parameters are unchanged.

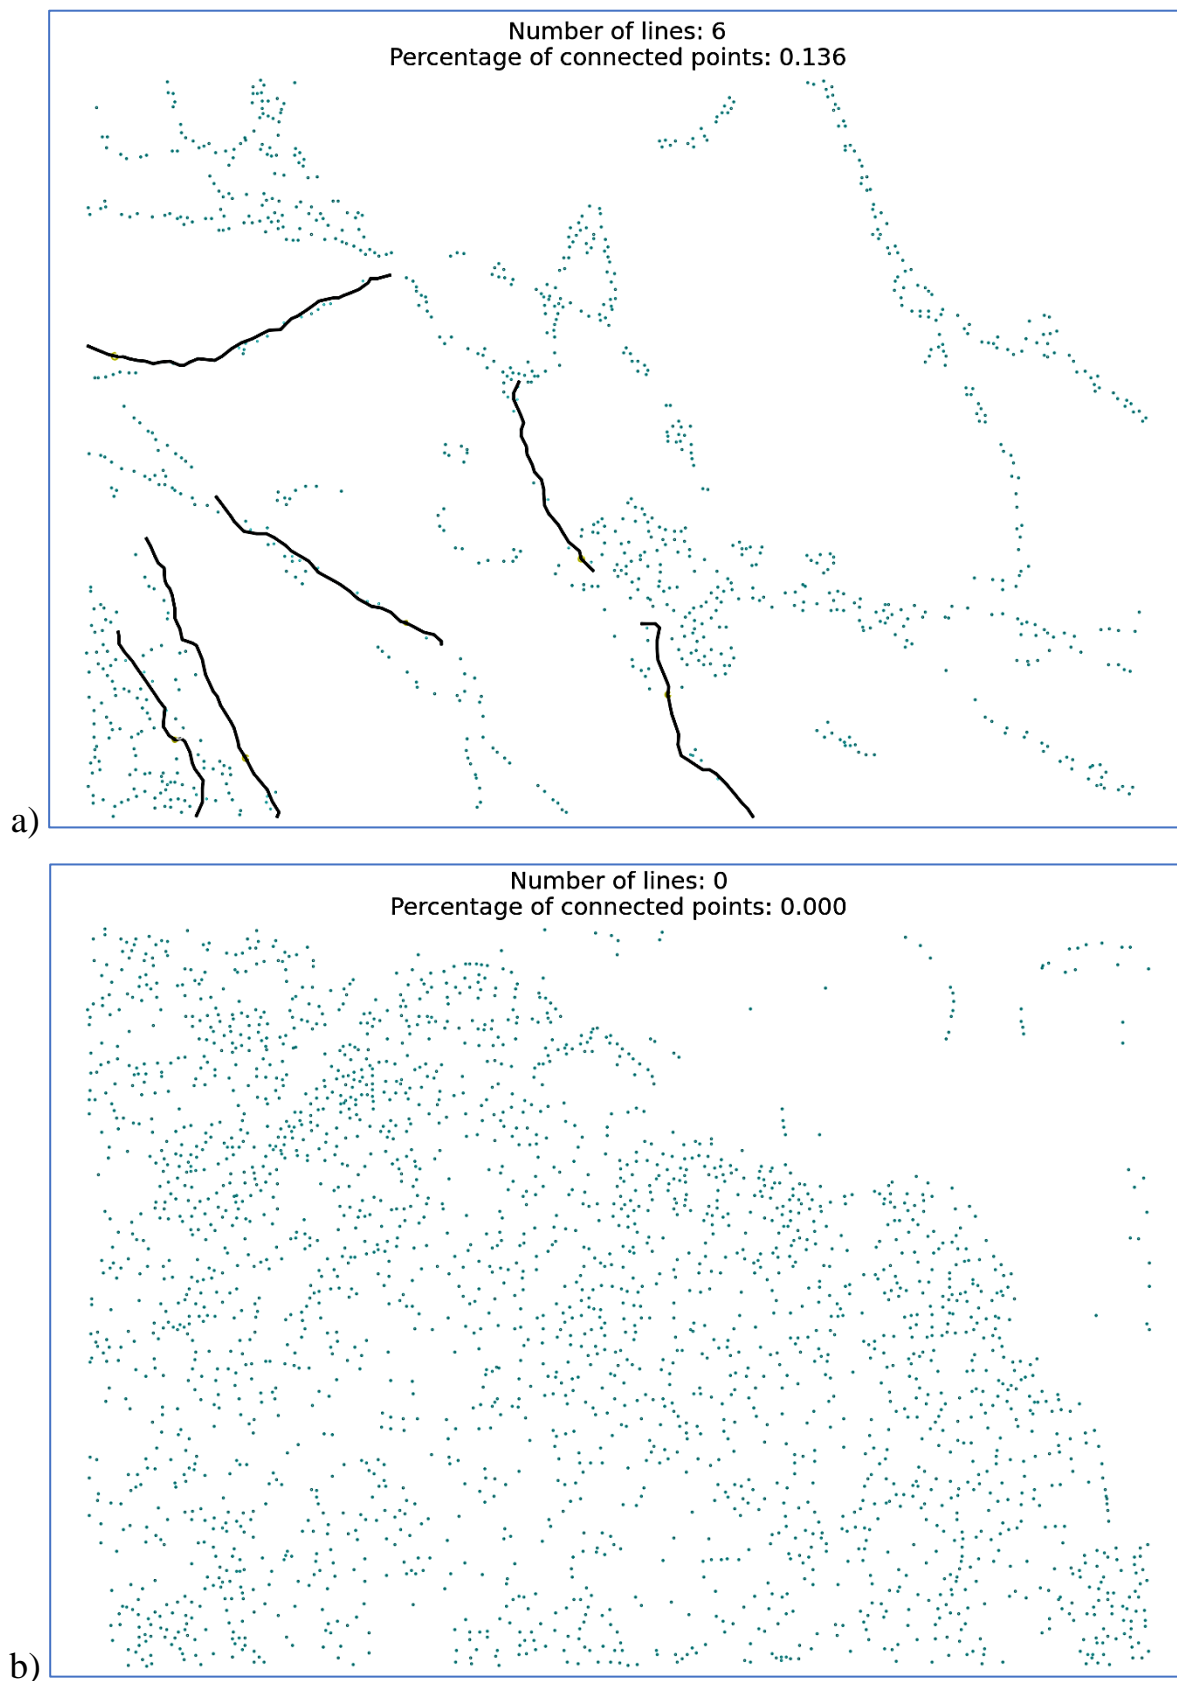

Figure 40 – Results of constructing lines for the minimum line length in the nanoparticles  $L_{min} = 20$ . The arrangement of the particles in the SEM image: a) ordered (S1-42); b) disordered (S3-157)

## 2. Values of the interpretable features for SEM images

As a result of the application of the proposed approach, an interpretable feature description was obtained, containing seven ordering features for each SEM image of the dataset\*.

- (O1) General consistency of orientations;
- (O2) Partial consistency of orientations;
- (O3) The fraction of reliable orientations;
- (L1) Number of lines constructed
- (L2) Smoothness of the constructed lines;
- (L3) Rectilinearity of the constructed lines;
- (L4) The fraction of connected nanoparticles.

When calculating the proposed features of the SEM images, the following parameter values were set:

- The proportionality coefficient for early stopping in local groups formation:  $k = 3$ ;
- The weight coefficient for estimating the local nanoparticles density in a SEM image:  $w_d = 1.5$ ;
- The maximum number of nanoparticles in a local group:  $s = 8$ ;
- The reliability threshold for computing the partial consistency of orientations:  $q_{min} = 0.85$ ;
- Proportionality coefficient to adjust the degree of influence of individual parts of the proposed metric of prevailing directions:  $C = 0.025$ ;
- Weight coefficient of the angular coaxiality in the metric of prevailing directions to ensure line smoothness:  $w_{coax} = 1.75$ ;
- Minimum line length in nanoparticles:  $L_{min} = 12$ ;
- The size of a polyline local fragment is used to estimate the smoothness of the constructed lines:  $f_{size} = 6$ .

Table 1 shows the values of the proposed features for each SEM image in the dataset\* based on the given parameters.

**Table 1** – Calculated values of the proposed features for each SEM image

| ID | Material | Scales | Class      | Features |       |       |    |       |       |       |
|----|----------|--------|------------|----------|-------|-------|----|-------|-------|-------|
|    |          |        |            | O1       | O2    | O3    | L1 | L2    | L3    | L4    |
| 1  | S1       | 50k    | ordered    | 0.398    | 0.991 | 0.949 | 75 | 0.946 | 0.882 | 0.137 |
| 1  | S4       | 50k    | disordered | 0.348    | 0.992 | 0.970 | 62 | 0.935 | 0.869 | 0.086 |
| 2  | S1       | 100k   | ordered    | 0.449    | 0.973 | 0.904 | 21 | 0.936 | 0.871 | 0.146 |
| 2  | S4       | 100k   | disordered | 0.300    | 0.975 | 0.904 | 10 | 0.954 | 0.919 | 0.050 |
| 3  | S1       | 100k   | ordered    | 0.452    | 0.976 | 0.881 | 20 | 0.920 | 0.844 | 0.141 |
| 3  | S4       | 50k    | disordered | 0.349    | 0.993 | 0.973 | 58 | 0.935 | 0.878 | 0.084 |
| 4  | S1       | 100k   | ordered    | 0.497    | 0.961 | 0.825 | 18 | 0.947 | 0.886 | 0.195 |
| 4  | S4       | 100k   | disordered | 0.309    | 0.972 | 0.890 | 10 | 0.960 | 0.936 | 0.061 |
| 5  | S1       | 100k   | ordered    | 0.447    | 0.963 | 0.855 | 22 | 0.953 | 0.909 | 0.147 |
| 5  | S4       | 50k    | disordered | 0.341    | 0.992 | 0.975 | 38 | 0.942 | 0.895 | 0.069 |

\* Boiko, D.A., Pentsak, E.O., Cherepanova, V.A. et al. Electron microscopy dataset for the recognition of nanoscale ordering effects and location of nanoparticles. *Sci Data* 7, 101 (2020). <https://doi.org/10.1038/s41597-020-0439-1>

| ID | Material | Scales | Class      | O1    | O2    | O3    | L1  | L2    | L3    | L4    |
|----|----------|--------|------------|-------|-------|-------|-----|-------|-------|-------|
| 6  | S1       | 100k   | ordered    | 0.374 | 0.980 | 0.894 | 15  | 0.946 | 0.897 | 0.098 |
| 6  | S4       | 100k   | disordered | 0.293 | 0.956 | 0.865 | 4   | 0.973 | 0.963 | 0.027 |
| 7  | S1       | 100k   | ordered    | 0.358 | 0.982 | 0.907 | 17  | 0.943 | 0.897 | 0.094 |
| 7  | S4       | 50k    | disordered | 0.344 | 0.994 | 0.976 | 71  | 0.937 | 0.880 | 0.102 |
| 8  | S1       | 100k   | ordered    | 0.395 | 0.974 | 0.875 | 23  | 0.949 | 0.913 | 0.130 |
| 8  | S4       | 100k   | disordered | 0.345 | 0.980 | 0.913 | 17  | 0.956 | 0.925 | 0.096 |
| 9  | S1       | 50k    | ordered    | 0.335 | 0.989 | 0.961 | 56  | 0.941 | 0.889 | 0.089 |
| 9  | S4       | 50k    | disordered | 0.345 | 0.989 | 0.962 | 60  | 0.936 | 0.870 | 0.094 |
| 10 | S1       | 100k   | ordered    | 0.387 | 0.978 | 0.906 | 16  | 0.957 | 0.930 | 0.094 |
| 10 | S4       | 50k    | disordered | 0.282 | 0.992 | 0.973 | 35  | 0.939 | 0.871 | 0.050 |
| 11 | S1       | 100k   | ordered    | 0.346 | 0.967 | 0.856 | 12  | 0.943 | 0.912 | 0.093 |
| 11 | S4       | 100k   | disordered | 0.281 | 0.980 | 0.910 | 12  | 0.939 | 0.878 | 0.055 |
| 12 | S1       | 100k   | ordered    | 0.467 | 0.958 | 0.810 | 27  | 0.957 | 0.876 | 0.207 |
| 12 | S4       | 50k    | disordered | 0.304 | 0.993 | 0.975 | 32  | 0.934 | 0.874 | 0.053 |
| 13 | S1       | 100k   | ordered    | 0.442 | 0.976 | 0.862 | 30  | 0.955 | 0.901 | 0.172 |
| 13 | S4       | 100k   | disordered | 0.273 | 0.978 | 0.923 | 6   | 0.936 | 0.878 | 0.033 |
| 14 | S1       | 100k   | ordered    | 0.379 | 0.953 | 0.858 | 28  | 0.959 | 0.930 | 0.133 |
| 14 | S4       | 50k    | disordered | 0.304 | 0.995 | 0.977 | 43  | 0.941 | 0.865 | 0.059 |
| 15 | S1       | 100k   | ordered    | 0.316 | 0.960 | 0.830 | 20  | 0.960 | 0.918 | 0.123 |
| 15 | S4       | 100k   | disordered | 0.280 | 0.972 | 0.897 | 11  | 0.895 | 0.808 | 0.059 |
| 16 | S1       | 50k    | ordered    | 0.351 | 0.982 | 0.936 | 86  | 0.951 | 0.911 | 0.132 |
| 16 | S4       | 50k    | disordered | 0.295 | 0.992 | 0.970 | 40  | 0.926 | 0.845 | 0.067 |
| 17 | S1       | 100k   | ordered    | 0.297 | 0.983 | 0.923 | 24  | 0.957 | 0.914 | 0.100 |
| 17 | S4       | 100k   | disordered | 0.300 | 0.979 | 0.894 | 9   | 0.926 | 0.767 | 0.052 |
| 18 | S1       | 50k    | ordered    | 0.410 | 0.993 | 0.973 | 89  | 0.952 | 0.899 | 0.146 |
| 18 | S4       | 50k    | disordered | 0.316 | 0.992 | 0.968 | 30  | 0.936 | 0.867 | 0.049 |
| 19 | S1       | 100k   | ordered    | 0.429 | 0.980 | 0.891 | 22  | 0.935 | 0.835 | 0.117 |
| 19 | S4       | 100k   | disordered | 0.328 | 0.973 | 0.869 | 8   | 0.916 | 0.839 | 0.043 |
| 20 | S1       | 100k   | ordered    | 0.419 | 0.971 | 0.881 | 20  | 0.953 | 0.919 | 0.130 |
| 20 | S4       | 100k   | disordered | 0.293 | 0.980 | 0.901 | 13  | 0.936 | 0.862 | 0.066 |
| 21 | S1       | 100k   | ordered    | 0.430 | 0.982 | 0.916 | 24  | 0.950 | 0.911 | 0.132 |
| 21 | S4       | 100k   | disordered | 0.310 | 0.980 | 0.910 | 15  | 0.938 | 0.903 | 0.067 |
| 22 | S1       | 100k   | ordered    | 0.394 | 0.971 | 0.902 | 18  | 0.952 | 0.896 | 0.126 |
| 22 | S4       | 50k    | disordered | 0.303 | 0.994 | 0.980 | 59  | 0.934 | 0.868 | 0.078 |
| 23 | S1       | 50k    | ordered    | 0.374 | 0.984 | 0.947 | 101 | 0.946 | 0.876 | 0.137 |
| 23 | S4       | 100k   | disordered | 0.308 | 0.979 | 0.913 | 10  | 0.957 | 0.904 | 0.045 |
| 24 | S1       | 100k   | ordered    | 0.354 | 0.968 | 0.866 | 23  | 0.957 | 0.918 | 0.129 |
| 24 | S4       | 50k    | disordered | 0.284 | 0.993 | 0.973 | 53  | 0.939 | 0.875 | 0.082 |
| 25 | S1       | 100k   | disordered | 0.483 | 0.958 | 0.838 | 21  | 0.958 | 0.919 | 0.212 |
| 25 | S4       | 100k   | ordered    | 0.279 | 0.979 | 0.914 | 14  | 0.938 | 0.871 | 0.084 |
| 26 | S1       | 50k    | ordered    | 0.466 | 0.991 | 0.958 | 78  | 0.945 | 0.878 | 0.150 |
| 26 | S5       | 100k   | disordered | 0.228 | 0.985 | 0.946 | 11  | 0.925 | 0.867 | 0.036 |
| 27 | S1       | 100k   | ordered    | 0.466 | 0.909 | 0.761 | 32  | 0.951 | 0.876 | 0.215 |
| 27 | S5       | 100k   | disordered | 0.253 | 0.987 | 0.913 | 14  | 0.898 | 0.785 | 0.060 |
| 28 | S1       | 50k    | ordered    | 0.420 | 0.989 | 0.951 | 74  | 0.938 | 0.880 | 0.148 |
| 28 | S5       | 50k    | disordered | 0.253 | 0.995 | 0.981 | 38  | 0.896 | 0.798 | 0.043 |
| 29 | S1       | 50k    | ordered    | 0.497 | 0.988 | 0.943 | 68  | 0.954 | 0.893 | 0.187 |
| 29 | S5       | 100k   | disordered | 0.268 | 0.983 | 0.929 | 7   | 0.875 | 0.768 | 0.028 |
| 30 | S1       | 100k   | ordered    | 0.507 | 0.954 | 0.782 | 18  | 0.966 | 0.931 | 0.170 |
| 30 | S5       | 50k    | disordered | 0.249 | 0.996 | 0.983 | 50  | 0.922 | 0.851 | 0.049 |
| 31 | S1       | 50k    | ordered    | 0.453 | 0.980 | 0.923 | 81  | 0.952 | 0.915 | 0.200 |

| ID | Material | Scales | Class      | O1    | O2    | O3    | L1  | L2    | L3    | L4    |
|----|----------|--------|------------|-------|-------|-------|-----|-------|-------|-------|
| 31 | S5       | 100k   | disordered | 0.237 | 0.985 | 0.940 | 15  | 0.938 | 0.887 | 0.050 |
| 32 | S1       | 50k    | ordered    | 0.416 | 0.985 | 0.939 | 66  | 0.941 | 0.854 | 0.145 |
| 32 | S5       | 50k    | disordered | 0.234 | 0.997 | 0.984 | 56  | 0.924 | 0.856 | 0.045 |
| 33 | S1       | 50k    | ordered    | 0.457 | 0.973 | 0.891 | 86  | 0.956 | 0.924 | 0.187 |
| 33 | S5       | 100k   | disordered | 0.209 | 0.985 | 0.956 | 13  | 0.926 | 0.859 | 0.032 |
| 34 | S1       | 100k   | ordered    | 0.321 | 0.952 | 0.839 | 11  | 0.957 | 0.946 | 0.090 |
| 34 | S5       | 100k   | disordered | 0.210 | 0.990 | 0.960 | 16  | 0.880 | 0.726 | 0.045 |
| 35 | S1       | 100k   | ordered    | 0.455 | 0.959 | 0.832 | 25  | 0.962 | 0.932 | 0.191 |
| 35 | S5       | 100k   | disordered | 0.178 | 0.990 | 0.960 | 13  | 0.917 | 0.808 | 0.032 |
| 36 | S1       | 50k    | ordered    | 0.475 | 0.984 | 0.927 | 76  | 0.949 | 0.903 | 0.194 |
| 36 | S5       | 50k    | disordered | 0.203 | 0.997 | 0.988 | 55  | 0.912 | 0.830 | 0.039 |
| 37 | S1       | 100k   | ordered    | 0.440 | 0.945 | 0.770 | 12  | 0.959 | 0.803 | 0.195 |
| 37 | S5       | 100k   | disordered | 0.213 | 0.989 | 0.941 | 12  | 0.906 | 0.804 | 0.032 |
| 38 | S1       | 100k   | ordered    | 0.402 | 0.966 | 0.866 | 26  | 0.968 | 0.939 | 0.152 |
| 38 | S5       | 100k   | disordered | 0.246 | 0.988 | 0.942 | 12  | 0.908 | 0.783 | 0.036 |
| 39 | S1       | 100k   | ordered    | 0.487 | 0.968 | 0.843 | 24  | 0.962 | 0.938 | 0.198 |
| 39 | S5       | 100k   | disordered | 0.191 | 0.988 | 0.953 | 10  | 0.916 | 0.825 | 0.024 |
| 40 | S1       | 50k    | ordered    | 0.492 | 0.988 | 0.947 | 74  | 0.951 | 0.897 | 0.191 |
| 40 | S5       | 100k   | disordered | 0.241 | 0.988 | 0.929 | 10  | 0.902 | 0.740 | 0.032 |
| 41 | S1       | 100k   | ordered    | 0.381 | 0.984 | 0.904 | 16  | 0.945 | 0.885 | 0.087 |
| 41 | S4       | 100k   | disordered | 0.281 | 0.980 | 0.918 | 11  | 0.911 | 0.786 | 0.054 |
| 42 | S1       | 100k   | ordered    | 0.520 | 0.935 | 0.795 | 15  | 0.969 | 0.943 | 0.220 |
| 42 | S4       | 50k    | disordered | 0.291 | 0.996 | 0.982 | 41  | 0.932 | 0.870 | 0.053 |
| 43 | S1       | 100k   | ordered    | 0.489 | 0.962 | 0.850 | 27  | 0.957 | 0.926 | 0.194 |
| 43 | S4       | 100k   | disordered | 0.274 | 0.986 | 0.926 | 4   | 0.900 | 0.811 | 0.015 |
| 44 | S1       | 100k   | ordered    | 0.381 | 0.987 | 0.905 | 20  | 0.939 | 0.878 | 0.091 |
| 44 | S4       | 50k    | disordered | 0.318 | 0.995 | 0.980 | 99  | 0.927 | 0.832 | 0.080 |
| 45 | S1       | 100k   | disordered | 0.383 | 0.974 | 0.896 | 17  | 0.945 | 0.886 | 0.099 |
| 45 | S4       | 50k    | ordered    | 0.294 | 0.991 | 0.963 | 43  | 0.936 | 0.859 | 0.059 |
| 46 | S1       | 100k   | ordered    | 0.446 | 0.941 | 0.789 | 38  | 0.952 | 0.910 | 0.232 |
| 46 | S4       | 100k   | disordered | 0.260 | 0.976 | 0.894 | 9   | 0.920 | 0.801 | 0.047 |
| 47 | S1       | 100k   | ordered    | 0.394 | 0.977 | 0.893 | 24  | 0.957 | 0.931 | 0.117 |
| 47 | S4       | 50k    | disordered | 0.302 | 0.994 | 0.971 | 68  | 0.941 | 0.892 | 0.084 |
| 48 | S1       | 100k   | ordered    | 0.490 | 0.957 | 0.833 | 45  | 0.936 | 0.863 | 0.245 |
| 48 | S4       | 100k   | disordered | 0.329 | 0.979 | 0.904 | 17  | 0.918 | 0.850 | 0.080 |
| 49 | S1       | 100k   | ordered    | 0.332 | 0.951 | 0.809 | 37  | 0.953 | 0.889 | 0.147 |
| 49 | S4       | 50k    | disordered | 0.400 | 0.984 | 0.936 | 30  | 0.961 | 0.928 | 0.098 |
| 50 | S1       | 50k    | ordered    | 0.320 | 0.961 | 0.868 | 129 | 0.943 | 0.888 | 0.151 |
| 50 | S4       | 100k   | disordered | 0.381 | 0.965 | 0.852 | 8   | 0.962 | 0.930 | 0.060 |
| 51 | S1       | 100k   | ordered    | 0.373 | 0.978 | 0.921 | 32  | 0.950 | 0.896 | 0.149 |
| 51 | S4       | 50k    | disordered | 0.289 | 0.989 | 0.951 | 18  | 0.961 | 0.917 | 0.038 |
| 52 | S1       | 50k    | ordered    | 0.354 | 0.991 | 0.967 | 96  | 0.932 | 0.869 | 0.105 |
| 52 | S4       | 100k   | disordered | 0.253 | 0.971 | 0.873 | 1   | 0.962 | 0.953 | 0.006 |
| 53 | S1       | 100k   | ordered    | 0.448 | 0.971 | 0.878 | 25  | 0.928 | 0.826 | 0.167 |
| 53 | S4       | 50k    | disordered | 0.291 | 0.992 | 0.970 | 25  | 0.934 | 0.857 | 0.036 |
| 54 | S1       | 100k   | ordered    | 0.483 | 0.926 | 0.834 | 30  | 0.957 | 0.923 | 0.236 |
| 54 | S4       | 100k   | disordered | 0.252 | 0.972 | 0.909 | 13  | 0.919 | 0.851 | 0.067 |
| 55 | S1       | 100k   | ordered    | 0.543 | 0.937 | 0.785 | 28  | 0.959 | 0.913 | 0.240 |
| 55 | S4       | 50k    | disordered | 0.318 | 0.992 | 0.961 | 54  | 0.931 | 0.865 | 0.073 |
| 56 | S1       | 100k   | ordered    | 0.476 | 0.970 | 0.849 | 25  | 0.955 | 0.904 | 0.188 |
| 56 | S4       | 100k   | disordered | 0.286 | 0.977 | 0.908 | 12  | 0.926 | 0.909 | 0.057 |

| ID | Material | Scales | Class      | O1    | O2    | O3    | L1  | L2    | L3    | L4    |
|----|----------|--------|------------|-------|-------|-------|-----|-------|-------|-------|
| 57 | S1       | 100k   | ordered    | 0.568 | 0.945 | 0.795 | 17  | 0.945 | 0.887 | 0.196 |
| 57 | S4       | 100k   | disordered | 0.272 | 0.972 | 0.882 | 3   | 0.932 | 0.906 | 0.022 |
| 58 | S1       | 100k   | ordered    | 0.555 | 0.970 | 0.895 | 31  | 0.950 | 0.884 | 0.242 |
| 58 | S3       | 100k   | disordered | 0.222 | 0.986 | 0.950 | 13  | 0.913 | 0.840 | 0.044 |
| 59 | S1       | 100k   | ordered    | 0.458 | 0.972 | 0.895 | 30  | 0.958 | 0.907 | 0.202 |
| 59 | S3       | 200k   | disordered | 0.206 | 0.951 | 0.821 | 5   | 0.921 | 0.869 | 0.049 |
| 60 | S1       | 100k   | ordered    | 0.317 | 0.966 | 0.897 | 23  | 0.940 | 0.855 | 0.095 |
| 60 | S3       | 50k    | disordered | 0.278 | 0.991 | 0.960 | 31  | 0.924 | 0.839 | 0.069 |
| 61 | S1       | 100k   | ordered    | 0.329 | 0.975 | 0.900 | 13  | 0.935 | 0.898 | 0.072 |
| 61 | S3       | 50k    | disordered | 0.250 | 0.996 | 0.980 | 32  | 0.914 | 0.840 | 0.036 |
| 62 | S1       | 100k   | ordered    | 0.532 | 0.976 | 0.868 | 25  | 0.944 | 0.892 | 0.158 |
| 62 | S3       | 100k   | disordered | 0.204 | 0.984 | 0.949 | 7   | 0.919 | 0.897 | 0.019 |
| 63 | S1       | 100k   | ordered    | 0.592 | 0.961 | 0.855 | 27  | 0.948 | 0.913 | 0.211 |
| 63 | S3       | 200k   | disordered | 0.204 | 0.934 | 0.789 | 2   | 0.976 | 0.954 | 0.024 |
| 64 | S1       | 100k   | ordered    | 0.520 | 0.926 | 0.766 | 30  | 0.956 | 0.908 | 0.260 |
| 64 | S3       | 50k    | disordered | 0.232 | 0.997 | 0.979 | 46  | 0.917 | 0.798 | 0.047 |
| 65 | S1       | 100k   | ordered    | 0.485 | 0.960 | 0.814 | 22  | 0.940 | 0.893 | 0.176 |
| 65 | S3       | 100k   | disordered | 0.214 | 0.990 | 0.966 | 17  | 0.914 | 0.856 | 0.042 |
| 66 | S1       | 50k    | ordered    | 0.500 | 0.976 | 0.909 | 117 | 0.962 | 0.921 | 0.232 |
| 66 | S3       | 200k   | disordered | 0.164 | 0.963 | 0.881 | 2   | 0.945 | 0.945 | 0.016 |
| 67 | S1       | 100k   | ordered    | 0.350 | 0.974 | 0.878 | 20  | 0.934 | 0.858 | 0.111 |
| 67 | S3       | 50k    | disordered | 0.306 | 0.993 | 0.963 | 38  | 0.937 | 0.867 | 0.066 |
| 68 | S1       | 100k   | disordered | 0.443 | 0.955 | 0.798 | 11  | 0.955 | 0.924 | 0.128 |
| 68 | S3       | 100k   | ordered    | 0.231 | 0.990 | 0.953 | 14  | 0.929 | 0.838 | 0.040 |
| 69 | S1       | 100k   | ordered    | 0.454 | 0.947 | 0.816 | 21  | 0.960 | 0.927 | 0.146 |
| 69 | S3       | 200k   | disordered | 0.208 | 0.963 | 0.850 | 6   | 0.919 | 0.842 | 0.056 |
| 70 | S1       | 100k   | ordered    | 0.464 | 0.947 | 0.778 | 21  | 0.957 | 0.919 | 0.198 |
| 70 | S3       | 50k    | disordered | 0.405 | 0.980 | 0.894 | 23  | 0.959 | 0.899 | 0.087 |
| 71 | S1       | 100k   | ordered    | 0.416 | 0.977 | 0.874 | 14  | 0.962 | 0.932 | 0.113 |
| 71 | S3       | 50k    | disordered | 0.262 | 0.995 | 0.979 | 45  | 0.917 | 0.808 | 0.052 |
| 72 | S1       | 100k   | ordered    | 0.431 | 0.976 | 0.883 | 19  | 0.958 | 0.914 | 0.127 |
| 72 | S3       | 100k   | disordered | 0.208 | 0.988 | 0.947 | 5   | 0.910 | 0.867 | 0.019 |
| 73 | S1       | 100k   | ordered    | 0.358 | 0.964 | 0.864 | 14  | 0.962 | 0.926 | 0.101 |
| 73 | S3       | 200k   | disordered | 0.167 | 0.969 | 0.842 | 4   | 0.914 | 0.783 | 0.043 |
| 74 | S1       | 100k   | ordered    | 0.316 | 0.940 | 0.810 | 18  | 0.955 | 0.929 | 0.145 |
| 74 | S3       | 200k   | disordered | 0.257 | 0.956 | 0.831 | 1   | 0.828 | 0.668 | 0.008 |
| 75 | S1       | 100k   | ordered    | 0.361 | 0.965 | 0.860 | 15  | 0.955 | 0.907 | 0.106 |
| 75 | S3       | 100k   | disordered | 0.262 | 0.981 | 0.923 | 10  | 0.921 | 0.813 | 0.045 |
| 76 | S1       | 100k   | ordered    | 0.472 | 0.953 | 0.816 | 24  | 0.962 | 0.922 | 0.219 |
| 76 | S3       | 50k    | disordered | 0.247 | 0.994 | 0.973 | 22  | 0.922 | 0.849 | 0.035 |
| 77 | S1       | 50k    | ordered    | 0.465 | 0.985 | 0.947 | 33  | 0.942 | 0.857 | 0.136 |
| 77 | S3       | 200k   | disordered | 0.240 | 0.957 | 0.835 | 2   | 0.928 | 0.784 | 0.019 |
| 78 | S1       | 100k   | ordered    | 0.432 | 0.947 | 0.803 | 15  | 0.962 | 0.948 | 0.153 |
| 78 | S3       | 100k   | disordered | 0.240 | 0.982 | 0.938 | 10  | 0.911 | 0.732 | 0.046 |
| 79 | S1       | 50k    | ordered    | 0.412 | 0.993 | 0.969 | 59  | 0.952 | 0.896 | 0.119 |
| 79 | S3       | 50k    | disordered | 0.269 | 0.992 | 0.971 | 32  | 0.938 | 0.853 | 0.051 |
| 80 | S1       | 100k   | ordered    | 0.497 | 0.945 | 0.835 | 28  | 0.949 | 0.914 | 0.205 |
| 80 | S3       | 200k   | disordered | 0.344 | 0.931 | 0.768 | 3   | 0.925 | 0.837 | 0.053 |
| 81 | S1       | 100k   | ordered    | 0.484 | 0.940 | 0.809 | 20  | 0.958 | 0.887 | 0.246 |
| 81 | S3       | 100k   | disordered | 0.264 | 0.974 | 0.898 | 7   | 0.950 | 0.878 | 0.049 |
| 82 | S1       | 100k   | ordered    | 0.487 | 0.912 | 0.750 | 31  | 0.952 | 0.914 | 0.216 |

| ID  | Material | Scales | Class      | O1    | O2    | O3    | L1 | L2    | L3    | L4    |
|-----|----------|--------|------------|-------|-------|-------|----|-------|-------|-------|
| 82  | S3       | 50k    | disordered | 0.269 | 0.990 | 0.962 | 20 | 0.904 | 0.785 | 0.048 |
| 83  | S1       | 100k   | disordered | 0.409 | 0.976 | 0.885 | 15 | 0.957 | 0.916 | 0.088 |
| 83  | S3       | 200k   | ordered    | 0.248 | 0.952 | 0.838 | 4  | 0.931 | 0.920 | 0.038 |
| 84  | S1       | 100k   | ordered    | 0.440 | 0.969 | 0.870 | 20 | 0.941 | 0.914 | 0.124 |
| 84  | S3       | 100k   | disordered | 0.245 | 0.982 | 0.916 | 11 | 0.910 | 0.812 | 0.052 |
| 85  | S1       | 100k   | ordered    | 0.410 | 0.973 | 0.864 | 17 | 0.953 | 0.899 | 0.107 |
| 85  | S3       | 50k    | disordered | 0.283 | 0.993 | 0.972 | 18 | 0.912 | 0.828 | 0.037 |
| 86  | S1       | 100k   | ordered    | 0.383 | 0.941 | 0.792 | 8  | 0.973 | 0.947 | 0.105 |
| 86  | S3       | 200k   | disordered | 0.237 | 0.954 | 0.813 | 1  | 0.789 | 0.542 | 0.010 |
| 87  | S1       | 100k   | ordered    | 0.500 | 0.964 | 0.826 | 20 | 0.965 | 0.932 | 0.188 |
| 87  | S3       | 100k   | disordered | 0.235 | 0.988 | 0.940 | 6  | 0.895 | 0.835 | 0.020 |
| 88  | S1       | 100k   | ordered    | 0.606 | 0.947 | 0.763 | 23 | 0.970 | 0.951 | 0.315 |
| 88  | S3       | 50k    | disordered | 0.277 | 0.990 | 0.971 | 28 | 0.908 | 0.788 | 0.051 |
| 89  | S1       | 100k   | ordered    | 0.392 | 0.960 | 0.868 | 22 | 0.946 | 0.866 | 0.158 |
| 89  | S3       | 200k   | disordered | 0.210 | 0.939 | 0.817 | 5  | 0.922 | 0.833 | 0.072 |
| 90  | S1       | 100k   | ordered    | 0.417 | 0.969 | 0.836 | 19 | 0.957 | 0.927 | 0.150 |
| 90  | S3       | 100k   | disordered | 0.212 | 0.981 | 0.908 | 8  | 0.919 | 0.870 | 0.040 |
| 91  | S1       | 100k   | ordered    | 0.513 | 0.945 | 0.812 | 22 | 0.950 | 0.902 | 0.211 |
| 91  | S3       | 200k   | disordered | 0.209 | 0.951 | 0.856 | 3  | 0.905 | 0.860 | 0.031 |
| 92  | S1       | 100k   | ordered    | 0.447 | 0.972 | 0.859 | 22 | 0.949 | 0.902 | 0.175 |
| 92  | S3       | 100k   | disordered | 0.223 | 0.985 | 0.938 | 8  | 0.894 | 0.822 | 0.027 |
| 93  | S1       | 100k   | ordered    | 0.463 | 0.963 | 0.872 | 26 | 0.942 | 0.861 | 0.161 |
| 93  | S3       | 50k    | disordered | 0.289 | 0.990 | 0.969 | 23 | 0.925 | 0.847 | 0.051 |
| 94  | S1       | 100k   | ordered    | 0.399 | 0.974 | 0.895 | 19 | 0.962 | 0.926 | 0.127 |
| 94  | S3       | 200k   | disordered | 0.238 | 0.940 | 0.727 | 2  | 0.847 | 0.672 | 0.043 |
| 95  | S1       | 100k   | ordered    | 0.404 | 0.936 | 0.817 | 39 | 0.955 | 0.912 | 0.226 |
| 95  | S3       | 100k   | disordered | 0.290 | 0.970 | 0.872 | 6  | 0.942 | 0.853 | 0.044 |
| 96  | S1       | 100k   | ordered    | 0.479 | 0.973 | 0.858 | 29 | 0.939 | 0.869 | 0.168 |
| 96  | S3       | 50k    | disordered | 0.323 | 0.985 | 0.929 | 17 | 0.951 | 0.871 | 0.055 |
| 97  | S1       | 100k   | ordered    | 0.344 | 0.966 | 0.862 | 22 | 0.946 | 0.901 | 0.106 |
| 97  | S3       | 200k   | disordered | 0.170 | 0.956 | 0.807 | 2  | 0.848 | 0.799 | 0.018 |
| 98  | S1       | 100k   | ordered    | 0.451 | 0.974 | 0.893 | 21 | 0.939 | 0.883 | 0.127 |
| 98  | S3       | 100k   | disordered | 0.221 | 0.982 | 0.940 | 8  | 0.865 | 0.703 | 0.040 |
| 99  | S1       | 50k    | ordered    | 0.455 | 0.993 | 0.967 | 73 | 0.952 | 0.908 | 0.150 |
| 99  | S3       | 50k    | disordered | 0.246 | 0.991 | 0.973 | 17 | 0.930 | 0.868 | 0.029 |
| 100 | S1       | 100k   | ordered    | 0.482 | 0.888 | 0.717 | 24 | 0.966 | 0.941 | 0.230 |
| 100 | S3       | 50k    | disordered | 0.268 | 0.991 | 0.967 | 26 | 0.934 | 0.847 | 0.049 |
| 101 | S1       | 100k   | ordered    | 0.466 | 0.881 | 0.688 | 17 | 0.956 | 0.897 | 0.247 |
| 101 | S3       | 100k   | disordered | 0.252 | 0.985 | 0.907 | 10 | 0.940 | 0.892 | 0.045 |
| 102 | S1       | 100k   | ordered    | 0.490 | 0.930 | 0.805 | 25 | 0.959 | 0.936 | 0.203 |
| 102 | S3       | 200k   | disordered | 0.171 | 0.956 | 0.813 | 6  | 0.932 | 0.822 | 0.062 |
| 103 | S1       | 100k   | ordered    | 0.441 | 0.912 | 0.710 | 24 | 0.943 | 0.875 | 0.215 |
| 103 | S3       | 50k    | disordered | 0.287 | 0.982 | 0.929 | 16 | 0.927 | 0.748 | 0.055 |
| 104 | S1       | 100k   | ordered    | 0.380 | 0.948 | 0.785 | 16 | 0.952 | 0.910 | 0.102 |
| 104 | S3       | 100k   | disordered | 0.252 | 0.976 | 0.918 | 6  | 0.937 | 0.898 | 0.027 |
| 105 | S1       | 100k   | ordered    | 0.450 | 0.872 | 0.673 | 18 | 0.959 | 0.918 | 0.155 |
| 105 | S3       | 200k   | disordered | 0.219 | 0.952 | 0.816 | 4  | 0.926 | 0.901 | 0.042 |
| 106 | S1       | 100k   | ordered    | 0.406 | 0.948 | 0.848 | 35 | 0.945 | 0.907 | 0.181 |
| 106 | S3       | 50k    | disordered | 0.285 | 0.993 | 0.971 | 28 | 0.916 | 0.832 | 0.054 |
| 107 | S1       | 100k   | ordered    | 0.382 | 0.968 | 0.876 | 14 | 0.960 | 0.936 | 0.113 |
| 107 | S3       | 100k   | disordered | 0.266 | 0.986 | 0.939 | 9  | 0.947 | 0.918 | 0.032 |



| ID  | Material | Scales | Class      | O1    | O2    | O3    | L1 | L2    | L3    | L4    |
|-----|----------|--------|------------|-------|-------|-------|----|-------|-------|-------|
| 108 | S1       | 100k   | ordered    | 0.316 | 0.951 | 0.813 | 20 | 0.953 | 0.893 | 0.106 |
| 108 | S3       | 200k   | disordered | 0.177 | 0.958 | 0.871 | 4  | 0.868 | 0.678 | 0.033 |
| 109 | S1       | 100k   | ordered    | 0.472 | 0.957 | 0.862 | 16 | 0.970 | 0.948 | 0.166 |
| 109 | S3       | 50k    | disordered | 0.241 | 0.989 | 0.969 | 25 | 0.914 | 0.807 | 0.043 |
| 110 | S1       | 100k   | ordered    | 0.420 | 0.964 | 0.849 | 26 | 0.931 | 0.860 | 0.159 |
| 110 | S3       | 100k   | disordered | 0.231 | 0.985 | 0.945 | 9  | 0.936 | 0.876 | 0.031 |
| 111 | S1       | 100k   | ordered    | 0.315 | 0.959 | 0.854 | 21 | 0.923 | 0.793 | 0.114 |
| 111 | S3       | 200k   | disordered | 0.232 | 0.944 | 0.786 | 0  | 0.000 | 0.000 | 0.000 |
| 112 | S1       | 100k   | ordered    | 0.522 | 0.959 | 0.826 | 25 | 0.967 | 0.926 | 0.246 |
| 112 | S3       | 50k    | disordered | 0.285 | 0.989 | 0.956 | 17 | 0.908 | 0.802 | 0.042 |
| 113 | S1       | 100k   | ordered    | 0.353 | 0.983 | 0.899 | 14 | 0.948 | 0.908 | 0.078 |
| 113 | S3       | 100k   | disordered | 0.229 | 0.979 | 0.906 | 6  | 0.923 | 0.902 | 0.040 |
| 114 | S1       | 100k   | ordered    | 0.381 | 0.967 | 0.868 | 16 | 0.950 | 0.927 | 0.105 |
| 114 | S3       | 200k   | disordered | 0.239 | 0.911 | 0.697 | 3  | 0.926 | 0.836 | 0.071 |
| 115 | S1       | 100k   | ordered    | 0.367 | 0.944 | 0.840 | 23 | 0.940 | 0.875 | 0.128 |
| 115 | S3       | 50k    | disordered | 0.445 | 0.980 | 0.905 | 23 | 0.943 | 0.849 | 0.106 |
| 116 | S1       | 100k   | ordered    | 0.355 | 0.982 | 0.905 | 15 | 0.930 | 0.870 | 0.072 |
| 116 | S3       | 100k   | disordered | 0.293 | 0.976 | 0.903 | 9  | 0.900 | 0.812 | 0.049 |
| 117 | S1       | 100k   | ordered    | 0.402 | 0.962 | 0.854 | 14 | 0.944 | 0.852 | 0.105 |
| 117 | S3       | 200k   | disordered | 0.291 | 0.940 | 0.807 | 3  | 0.918 | 0.885 | 0.036 |
| 118 | S1       | 100k   | ordered    | 0.465 | 0.898 | 0.695 | 38 | 0.940 | 0.808 | 0.262 |
| 118 | S3       | 50k    | disordered | 0.323 | 0.978 | 0.916 | 6  | 0.923 | 0.846 | 0.028 |
| 119 | S1       | 100k   | ordered    | 0.359 | 0.967 | 0.866 | 20 | 0.946 | 0.901 | 0.092 |
| 119 | S3       | 100k   | disordered | 0.279 | 0.960 | 0.853 | 3  | 0.918 | 0.816 | 0.025 |
| 120 | S1       | 50k    | ordered    | 0.410 | 0.983 | 0.938 | 88 | 0.946 | 0.876 | 0.176 |
| 120 | S3       | 200k   | disordered | 0.323 | 0.926 | 0.725 | 0  | 0.000 | 0.000 | 0.000 |
| 121 | S1       | 50k    | ordered    | 0.353 | 0.967 | 0.907 | 65 | 0.939 | 0.874 | 0.125 |
| 121 | S3       | 50k    | disordered | 0.311 | 0.994 | 0.970 | 40 | 0.942 | 0.874 | 0.064 |
| 122 | S1       | 50k    | ordered    | 0.558 | 0.944 | 0.825 | 90 | 0.958 | 0.904 | 0.280 |
| 122 | S3       | 100k   | disordered | 0.206 | 0.990 | 0.945 | 12 | 0.931 | 0.885 | 0.038 |
| 123 | S1       | 100k   | disordered | 0.385 | 0.961 | 0.879 | 23 | 0.946 | 0.904 | 0.132 |
| 123 | S3       | 50k    | ordered    | 0.301 | 0.992 | 0.960 | 22 | 0.936 | 0.854 | 0.044 |
| 124 | S1       | 100k   | ordered    | 0.530 | 0.930 | 0.761 | 39 | 0.954 | 0.908 | 0.265 |
| 124 | S3       | 100k   | disordered | 0.258 | 0.984 | 0.909 | 9  | 0.942 | 0.830 | 0.039 |
| 125 | S1       | 100k   | ordered    | 0.363 | 0.977 | 0.902 | 29 | 0.933 | 0.853 | 0.126 |
| 125 | S3       | 200k   | disordered | 0.189 | 0.959 | 0.845 | 3  | 0.950 | 0.922 | 0.027 |
| 126 | S1       | 100k   | ordered    | 0.457 | 0.973 | 0.885 | 23 | 0.951 | 0.897 | 0.174 |
| 126 | S3       | 50k    | disordered | 0.340 | 0.990 | 0.963 | 19 | 0.944 | 0.889 | 0.047 |
| 127 | S1       | 100k   | ordered    | 0.446 | 0.972 | 0.846 | 19 | 0.946 | 0.879 | 0.151 |
| 127 | S3       | 100k   | disordered | 0.260 | 0.982 | 0.897 | 8  | 0.947 | 0.868 | 0.050 |
| 128 | S1       | 100k   | ordered    | 0.374 | 0.975 | 0.866 | 17 | 0.944 | 0.901 | 0.105 |
| 128 | S3       | 200k   | disordered | 0.247 | 0.917 | 0.757 | 3  | 0.924 | 0.868 | 0.058 |
| 129 | S1       | 100k   | ordered    | 0.454 | 0.971 | 0.846 | 18 | 0.940 | 0.870 | 0.124 |
| 129 | S3       | 50k    | disordered | 0.344 | 0.986 | 0.928 | 15 | 0.907 | 0.791 | 0.058 |
| 130 | S1       | 100k   | ordered    | 0.368 | 0.973 | 0.892 | 13 | 0.962 | 0.943 | 0.092 |
| 130 | S3       | 100k   | disordered | 0.276 | 0.972 | 0.892 | 6  | 0.913 | 0.850 | 0.037 |
| 131 | S1       | 50k    | ordered    | 0.386 | 0.982 | 0.947 | 77 | 0.953 | 0.869 | 0.137 |
| 131 | S3       | 200k   | disordered | 0.280 | 0.881 | 0.633 | 1  | 0.840 | 0.805 | 0.032 |
| 132 | S1       | 100k   | ordered    | 0.486 | 0.967 | 0.854 | 25 | 0.966 | 0.945 | 0.191 |
| 132 | S3       | 200k   | disordered | 0.251 | 0.939 | 0.763 | 1  | 0.962 | 0.950 | 0.013 |
| 133 | S1       | 100k   | ordered    | 0.415 | 0.954 | 0.846 | 13 | 0.954 | 0.899 | 0.112 |

| ID  | Material | Scales | Class      | O1    | O2    | O3    | L1 | L2    | L3    | L4    |
|-----|----------|--------|------------|-------|-------|-------|----|-------|-------|-------|
| 133 | S3       | 100k   | disordered | 0.286 | 0.973 | 0.894 | 6  | 0.915 | 0.873 | 0.041 |
| 134 | S1       | 100k   | ordered    | 0.427 | 0.933 | 0.777 | 27 | 0.941 | 0.826 | 0.178 |
| 134 | S3       | 50k    | disordered | 0.327 | 0.989 | 0.956 | 23 | 0.921 | 0.825 | 0.061 |
| 135 | S1       | 100k   | ordered    | 0.476 | 0.972 | 0.871 | 28 | 0.949 | 0.914 | 0.166 |
| 135 | S3       | 200k   | disordered | 0.257 | 0.938 | 0.739 | 2  | 0.928 | 0.900 | 0.034 |
| 136 | S1       | 100k   | ordered    | 0.498 | 0.951 | 0.816 | 29 | 0.961 | 0.935 | 0.195 |
| 136 | S3       | 100k   | disordered | 0.202 | 0.984 | 0.924 | 6  | 0.917 | 0.879 | 0.027 |
| 137 | S1       | 100k   | ordered    | 0.538 | 0.975 | 0.850 | 27 | 0.953 | 0.913 | 0.201 |
| 137 | S3       | 50k    | disordered | 0.309 | 0.993 | 0.970 | 43 | 0.949 | 0.885 | 0.075 |
| 138 | S1       | 100k   | ordered    | 0.392 | 0.973 | 0.879 | 13 | 0.957 | 0.940 | 0.079 |
| 138 | S3       | 200k   | disordered | 0.224 | 0.943 | 0.808 | 3  | 0.884 | 0.796 | 0.040 |
| 139 | S1       | 100k   | ordered    | 0.406 | 0.965 | 0.850 | 17 | 0.944 | 0.893 | 0.136 |
| 139 | S3       | 100k   | disordered | 0.240 | 0.982 | 0.915 | 3  | 0.928 | 0.846 | 0.013 |
| 140 | S1       | 100k   | ordered    | 0.539 | 0.949 | 0.818 | 23 | 0.960 | 0.915 | 0.221 |
| 140 | S3       | 50k    | disordered | 0.293 | 0.992 | 0.970 | 32 | 0.914 | 0.830 | 0.052 |
| 141 | S1       | 100k   | ordered    | 0.378 | 0.959 | 0.818 | 11 | 0.945 | 0.905 | 0.099 |
| 141 | S3       | 200k   | disordered | 0.186 | 0.946 | 0.831 | 1  | 0.912 | 0.939 | 0.008 |
| 142 | S1       | 100k   | ordered    | 0.489 | 0.953 | 0.807 | 17 | 0.938 | 0.872 | 0.193 |
| 142 | S3       | 100k   | disordered | 0.211 | 0.987 | 0.934 | 12 | 0.901 | 0.825 | 0.045 |
| 143 | S1       | 100k   | ordered    | 0.569 | 0.954 | 0.821 | 26 | 0.969 | 0.930 | 0.298 |
| 143 | S3       | 50k    | disordered | 0.266 | 0.992 | 0.963 | 29 | 0.919 | 0.840 | 0.053 |
| 144 | S1       | 100k   | ordered    | 0.616 | 0.952 | 0.793 | 18 | 0.975 | 0.956 | 0.222 |
| 144 | S3       | 50k    | disordered | 0.309 | 0.992 | 0.961 | 22 | 0.928 | 0.831 | 0.048 |
| 145 | S1       | 100k   | ordered    | 0.538 | 0.963 | 0.878 | 20 | 0.969 | 0.935 | 0.203 |
| 145 | S3       | 100k   | disordered | 0.263 | 0.979 | 0.890 | 9  | 0.942 | 0.880 | 0.054 |
| 146 | S1       | 100k   | ordered    | 0.537 | 0.951 | 0.817 | 24 | 0.960 | 0.932 | 0.243 |
| 146 | S3       | 200k   | disordered | 0.237 | 0.944 | 0.778 | 4  | 0.927 | 0.846 | 0.050 |
| 147 | S1       | 100k   | ordered    | 0.464 | 0.947 | 0.800 | 29 | 0.945 | 0.884 | 0.206 |
| 147 | S3       | 50k    | disordered | 0.428 | 0.980 | 0.918 | 17 | 0.948 | 0.858 | 0.083 |
| 148 | S1       | 100k   | ordered    | 0.381 | 0.971 | 0.859 | 15 | 0.951 | 0.895 | 0.098 |
| 148 | S3       | 100k   | disordered | 0.305 | 0.964 | 0.860 | 10 | 0.878 | 0.753 | 0.091 |
| 149 | S1       | 100k   | ordered    | 0.361 | 0.961 | 0.833 | 10 | 0.966 | 0.925 | 0.082 |
| 149 | S3       | 200k   | disordered | 0.261 | 0.864 | 0.669 | 1  | 0.825 | 0.710 | 0.043 |
| 150 | S1       | 100k   | ordered    | 0.393 | 0.965 | 0.832 | 19 | 0.956 | 0.910 | 0.150 |
| 150 | S3       | 50k    | disordered | 0.265 | 0.992 | 0.975 | 13 | 0.930 | 0.876 | 0.024 |
| 151 | S1       | 100k   | ordered    | 0.407 | 0.956 | 0.814 | 17 | 0.952 | 0.900 | 0.158 |
| 151 | S3       | 100k   | disordered | 0.304 | 0.980 | 0.894 | 7  | 0.937 | 0.894 | 0.043 |
| 152 | S1       | 50k    | ordered    | 0.571 | 0.985 | 0.932 | 73 | 0.964 | 0.934 | 0.261 |
| 152 | S3       | 200k   | disordered | 0.236 | 0.920 | 0.725 | 0  | 0.000 | 0.000 | 0.000 |
| 153 | S1       | 50k    | ordered    | 0.563 | 0.984 | 0.922 | 58 | 0.951 | 0.893 | 0.207 |
| 153 | S3       | 50k    | disordered | 0.297 | 0.993 | 0.966 | 22 | 0.932 | 0.859 | 0.038 |
| 154 | S1       | 100k   | ordered    | 0.494 | 0.959 | 0.784 | 17 | 0.950 | 0.859 | 0.198 |
| 154 | S3       | 100k   | disordered | 0.213 | 0.985 | 0.922 | 5  | 0.924 | 0.870 | 0.016 |
| 155 | S1       | 100k   | disordered | 0.447 | 0.965 | 0.826 | 18 | 0.957 | 0.926 | 0.119 |
| 155 | S3       | 200k   | ordered    | 0.197 | 0.966 | 0.887 | 6  | 0.901 | 0.824 | 0.045 |
| 156 | S1       | 100k   | ordered    | 0.537 | 0.959 | 0.840 | 24 | 0.963 | 0.940 | 0.252 |
| 156 | S3       | 50k    | disordered | 0.268 | 0.992 | 0.964 | 18 | 0.908 | 0.801 | 0.032 |
| 157 | S1       | 100k   | ordered    | 0.423 | 0.972 | 0.843 | 17 | 0.956 | 0.868 | 0.149 |
| 157 | S3       | 100k   | disordered | 0.258 | 0.976 | 0.892 | 2  | 0.980 | 0.961 | 0.010 |
| 158 | S1       | 100k   | ordered    | 0.452 | 0.973 | 0.890 | 20 | 0.956 | 0.877 | 0.120 |
| 158 | S3       | 200k   | disordered | 0.313 | 0.920 | 0.746 | 3  | 0.882 | 0.707 | 0.058 |

| ID  | Material | Scales | Class      | O1    | O2    | O3    | L1  | L2    | L3    | L4    |
|-----|----------|--------|------------|-------|-------|-------|-----|-------|-------|-------|
| 159 | S1       | 50k    | ordered    | 0.414 | 0.991 | 0.969 | 58  | 0.942 | 0.883 | 0.124 |
| 159 | S3       | 50k    | disordered | 0.369 | 0.987 | 0.937 | 39  | 0.948 | 0.878 | 0.096 |
| 160 | S1       | 100k   | ordered    | 0.436 | 0.962 | 0.858 | 22  | 0.950 | 0.903 | 0.180 |
| 160 | S3       | 100k   | disordered | 0.304 | 0.960 | 0.835 | 5   | 0.948 | 0.903 | 0.042 |
| 161 | S1       | 100k   | ordered    | 0.516 | 0.962 | 0.834 | 22  | 0.951 | 0.906 | 0.192 |
| 161 | S3       | 200k   | disordered | 0.253 | 0.832 | 0.584 | 0   | 0.000 | 0.000 | 0.000 |
| 162 | S1       | 100k   | ordered    | 0.346 | 0.981 | 0.893 | 19  | 0.936 | 0.829 | 0.100 |
| 162 | S3       | 50k    | disordered | 0.316 | 0.990 | 0.961 | 22  | 0.938 | 0.880 | 0.053 |
| 163 | S1       | 100k   | ordered    | 0.449 | 0.959 | 0.860 | 25  | 0.940 | 0.864 | 0.175 |
| 163 | S3       | 100k   | disordered | 0.283 | 0.982 | 0.903 | 10  | 0.899 | 0.688 | 0.053 |
| 164 | S1       | 100k   | ordered    | 0.480 | 0.955 | 0.807 | 25  | 0.961 | 0.922 | 0.188 |
| 164 | S3       | 200k   | disordered | 0.252 | 0.930 | 0.763 | 3   | 0.842 | 0.662 | 0.045 |
| 165 | S1       | 100k   | ordered    | 0.446 | 0.936 | 0.797 | 12  | 0.954 | 0.922 | 0.210 |
| 165 | S3       | 200k   | disordered | 0.205 | 0.910 | 0.602 | 2   | 0.933 | 0.898 | 0.049 |
| 166 | S1       | 100k   | ordered    | 0.421 | 0.970 | 0.865 | 19  | 0.951 | 0.893 | 0.144 |
| 166 | S3       | 100k   | disordered | 0.252 | 0.961 | 0.839 | 3   | 0.897 | 0.859 | 0.033 |
| 167 | S1       | 100k   | ordered    | 0.553 | 0.958 | 0.811 | 31  | 0.965 | 0.939 | 0.297 |
| 167 | S3       | 50k    | disordered | 0.282 | 0.984 | 0.937 | 12  | 0.928 | 0.865 | 0.043 |
| 168 | S1       | 100k   | ordered    | 0.510 | 0.955 | 0.788 | 13  | 0.957 | 0.847 | 0.167 |
| 168 | S3       | 50k    | disordered | 0.341 | 0.990 | 0.942 | 17  | 0.902 | 0.774 | 0.047 |
| 169 | S1       | 50k    | ordered    | 0.430 | 0.964 | 0.877 | 111 | 0.942 | 0.885 | 0.183 |
| 169 | S3       | 100k   | disordered | 0.240 | 0.964 | 0.839 | 2   | 0.738 | 0.521 | 0.019 |
| 170 | S1       | 100k   | ordered    | 0.463 | 0.969 | 0.850 | 25  | 0.964 | 0.935 | 0.197 |
| 170 | S3       | 200k   | disordered | 0.213 | 0.913 | 0.709 | 1   | 0.955 | 0.907 | 0.027 |
| 171 | S1       | 50k    | ordered    | 0.391 | 0.993 | 0.970 | 81  | 0.943 | 0.873 | 0.131 |
| 171 | S3       | 50k    | disordered | 0.263 | 0.993 | 0.973 | 33  | 0.913 | 0.817 | 0.056 |
| 172 | S1       | 50k    | ordered    | 0.377 | 0.987 | 0.954 | 96  | 0.940 | 0.861 | 0.141 |
| 172 | S3       | 100k   | disordered | 0.246 | 0.974 | 0.887 | 9   | 0.919 | 0.806 | 0.049 |
| 173 | S1       | 100k   | ordered    | 0.374 | 0.969 | 0.872 | 25  | 0.950 | 0.882 | 0.142 |
| 173 | S3       | 50k    | disordered | 0.308 | 0.992 | 0.966 | 38  | 0.922 | 0.865 | 0.067 |
| 174 | S1       | 50k    | ordered    | 0.405 | 0.989 | 0.956 | 74  | 0.940 | 0.867 | 0.144 |
| 174 | S3       | 100k   | disordered | 0.272 | 0.985 | 0.915 | 5   | 0.864 | 0.722 | 0.028 |
| 175 | S1       | 100k   | ordered    | 0.335 | 0.970 | 0.887 | 19  | 0.958 | 0.927 | 0.115 |
| 175 | S3       | 200k   | disordered | 0.228 | 0.931 | 0.771 | 2   | 0.957 | 0.925 | 0.045 |
| 176 | S1       | 50k    | ordered    | 0.402 | 0.994 | 0.969 | 67  | 0.947 | 0.886 | 0.114 |
| 176 | S3       | 50k    | disordered | 0.303 | 0.991 | 0.961 | 24  | 0.904 | 0.775 | 0.052 |
| 177 | S1       | 100k   | ordered    | 0.403 | 0.972 | 0.886 | 21  | 0.947 | 0.904 | 0.107 |
| 177 | S3       | 100k   | disordered | 0.255 | 0.967 | 0.859 | 4   | 0.840 | 0.581 | 0.029 |
| 178 | S1       | 50k    | ordered    | 0.370 | 0.994 | 0.976 | 97  | 0.949 | 0.904 | 0.132 |
| 178 | S3       | 200k   | disordered | 0.283 | 0.915 | 0.709 | 3   | 0.906 | 0.833 | 0.055 |
| 179 | S1       | 100k   | ordered    | 0.354 | 0.981 | 0.904 | 21  | 0.939 | 0.880 | 0.091 |
| 179 | S3       | 50k    | disordered | 0.317 | 0.984 | 0.933 | 14  | 0.928 | 0.866 | 0.052 |
| 180 | S1       | 50k    | ordered    | 0.360 | 0.991 | 0.968 | 80  | 0.942 | 0.877 | 0.116 |
| 180 | S3       | 100k   | disordered | 0.264 | 0.972 | 0.859 | 5   | 0.925 | 0.790 | 0.042 |
| 181 | S1       | 100k   | ordered    | 0.417 | 0.979 | 0.892 | 25  | 0.955 | 0.921 | 0.147 |
| 181 | S3       | 200k   | disordered | 0.234 | 0.942 | 0.774 | 2   | 0.852 | 0.656 | 0.033 |
| 182 | S1       | 50k    | ordered    | 0.480 | 0.990 | 0.964 | 88  | 0.948 | 0.894 | 0.174 |
| 182 | S3       | 50k    | disordered | 0.277 | 0.991 | 0.960 | 24  | 0.919 | 0.771 | 0.060 |
| 183 | S1       | 100k   | ordered    | 0.503 | 0.962 | 0.865 | 14  | 0.959 | 0.886 | 0.151 |
| 183 | S3       | 100k   | disordered | 0.248 | 0.983 | 0.905 | 9   | 0.901 | 0.837 | 0.046 |
| 184 | S1       | 50k    | ordered    | 0.380 | 0.995 | 0.978 | 81  | 0.946 | 0.895 | 0.114 |

| ID  | Material | Scales | Class      | O1    | O2    | O3    | L1  | L2    | L3    | L4    |
|-----|----------|--------|------------|-------|-------|-------|-----|-------|-------|-------|
| 184 | S3       | 200k   | disordered | 0.174 | 0.931 | 0.814 | 2   | 0.765 | 0.627 | 0.029 |
| 185 | S1       | 100k   | ordered    | 0.428 | 0.972 | 0.865 | 24  | 0.946 | 0.912 | 0.158 |
| 185 | S3       | 50k    | disordered | 0.278 | 0.992 | 0.965 | 14  | 0.930 | 0.860 | 0.029 |
| 186 | S1       | 50k    | ordered    | 0.493 | 0.979 | 0.929 | 81  | 0.962 | 0.934 | 0.232 |
| 186 | S3       | 100k   | disordered | 0.248 | 0.977 | 0.905 | 4   | 0.869 | 0.767 | 0.022 |
| 187 | S1       | 100k   | disordered | 0.451 | 0.961 | 0.838 | 22  | 0.962 | 0.906 | 0.227 |
| 187 | S3       | 50k    | ordered    | 0.348 | 0.988 | 0.943 | 15  | 0.942 | 0.882 | 0.048 |
| 188 | S1       | 50k    | ordered    | 0.473 | 0.986 | 0.959 | 83  | 0.950 | 0.897 | 0.178 |
| 188 | S3       | 100k   | disordered | 0.294 | 0.973 | 0.879 | 6   | 0.936 | 0.911 | 0.050 |
| 189 | S1       | 100k   | ordered    | 0.543 | 0.952 | 0.831 | 18  | 0.969 | 0.948 | 0.165 |
| 189 | S3       | 200k   | disordered | 0.186 | 0.900 | 0.679 | 1   | 0.874 | 0.687 | 0.027 |
| 190 | S1       | 50k    | ordered    | 0.490 | 0.981 | 0.927 | 90  | 0.956 | 0.909 | 0.215 |
| 190 | S3       | 100k   | disordered | 0.308 | 0.971 | 0.822 | 5   | 0.945 | 0.929 | 0.043 |
| 191 | S1       | 100k   | ordered    | 0.511 | 0.925 | 0.765 | 24  | 0.938 | 0.890 | 0.174 |
| 191 | S3       | 50k    | disordered | 0.362 | 0.980 | 0.916 | 8   | 0.946 | 0.861 | 0.036 |
| 192 | S1       | 50k    | ordered    | 0.468 | 0.992 | 0.951 | 75  | 0.956 | 0.915 | 0.164 |
| 192 | S3       | 200k   | disordered | 0.178 | 0.931 | 0.747 | 2   | 0.896 | 0.820 | 0.041 |
| 193 | S1       | 100k   | ordered    | 0.501 | 0.971 | 0.853 | 25  | 0.963 | 0.935 | 0.213 |
| 193 | S3       | 50k    | disordered | 0.268 | 0.991 | 0.961 | 24  | 0.940 | 0.819 | 0.044 |
| 194 | S1       | 50k    | ordered    | 0.454 | 0.989 | 0.949 | 91  | 0.949 | 0.892 | 0.186 |
| 194 | S3       | 100k   | disordered | 0.212 | 0.987 | 0.936 | 10  | 0.901 | 0.805 | 0.038 |
| 195 | S1       | 100k   | ordered    | 0.455 | 0.952 | 0.856 | 19  | 0.946 | 0.879 | 0.145 |
| 195 | S3       | 200k   | disordered | 0.205 | 0.922 | 0.753 | 3   | 0.867 | 0.705 | 0.057 |
| 196 | S1       | 50k    | ordered    | 0.398 | 0.994 | 0.972 | 87  | 0.950 | 0.903 | 0.135 |
| 196 | S3       | 50k    | disordered | 0.288 | 0.982 | 0.934 | 13  | 0.922 | 0.837 | 0.042 |
| 197 | S1       | 100k   | ordered    | 0.370 | 0.976 | 0.898 | 15  | 0.938 | 0.874 | 0.087 |
| 197 | S3       | 100k   | disordered | 0.303 | 0.958 | 0.847 | 4   | 0.871 | 0.756 | 0.031 |
| 198 | S1       | 50k    | ordered    | 0.393 | 0.993 | 0.966 | 67  | 0.945 | 0.883 | 0.132 |
| 198 | S3       | 200k   | disordered | 0.293 | 0.938 | 0.761 | 3   | 0.920 | 0.872 | 0.056 |
| 199 | S1       | 100k   | ordered    | 0.460 | 0.971 | 0.879 | 13  | 0.934 | 0.863 | 0.092 |
| 199 | S3       | 50k    | disordered | 0.275 | 0.993 | 0.965 | 25  | 0.903 | 0.812 | 0.050 |
| 200 | S1       | 50k    | ordered    | 0.357 | 0.992 | 0.962 | 69  | 0.936 | 0.875 | 0.095 |
| 200 | S3       | 100k   | disordered | 0.281 | 0.978 | 0.906 | 10  | 0.891 | 0.737 | 0.050 |
| 201 | S1       | 100k   | ordered    | 0.475 | 0.965 | 0.852 | 22  | 0.956 | 0.929 | 0.157 |
| 201 | S3       | 200k   | disordered | 0.220 | 0.931 | 0.798 | 3   | 0.921 | 0.799 | 0.063 |
| 202 | S1       | 50k    | ordered    | 0.449 | 0.993 | 0.966 | 81  | 0.943 | 0.896 | 0.115 |
| 202 | S3       | 50k    | disordered | 0.250 | 0.994 | 0.974 | 29  | 0.892 | 0.774 | 0.040 |
| 203 | S1       | 100k   | ordered    | 0.407 | 0.974 | 0.900 | 22  | 0.952 | 0.923 | 0.123 |
| 203 | S3       | 100k   | disordered | 0.237 | 0.980 | 0.929 | 4   | 0.946 | 0.919 | 0.017 |
| 204 | S1       | 50k    | ordered    | 0.397 | 0.992 | 0.965 | 81  | 0.937 | 0.887 | 0.107 |
| 204 | S3       | 200k   | disordered | 0.194 | 0.946 | 0.794 | 4   | 0.936 | 0.901 | 0.045 |
| 205 | S1       | 100k   | ordered    | 0.421 | 0.979 | 0.898 | 22  | 0.945 | 0.908 | 0.108 |
| 205 | S3       | 50k    | disordered | 0.292 | 0.990 | 0.962 | 15  | 0.913 | 0.820 | 0.036 |
| 206 | S1       | 50k    | ordered    | 0.434 | 0.990 | 0.957 | 102 | 0.936 | 0.859 | 0.144 |
| 206 | S3       | 100k   | disordered | 0.264 | 0.974 | 0.874 | 4   | 0.968 | 0.868 | 0.031 |
| 207 | S1       | 100k   | ordered    | 0.409 | 0.973 | 0.865 | 23  | 0.952 | 0.914 | 0.129 |
| 207 | S3       | 200k   | disordered | 0.253 | 0.925 | 0.782 | 1   | 0.804 | 0.707 | 0.014 |
| 208 | S1       | 50k    | ordered    | 0.400 | 0.990 | 0.969 | 95  | 0.952 | 0.911 | 0.132 |
| 208 | S3       | 50k    | disordered | 0.252 | 0.995 | 0.981 | 26  | 0.916 | 0.864 | 0.038 |
| 209 | S1       | 100k   | ordered    | 0.425 | 0.984 | 0.925 | 26  | 0.945 | 0.913 | 0.117 |
| 209 | S3       | 100k   | disordered | 0.229 | 0.986 | 0.932 | 7   | 0.941 | 0.874 | 0.028 |

| ID  | Material | Scales | Class      | O1    | O2    | O3    | L1 | L2    | L3    | L4    |
|-----|----------|--------|------------|-------|-------|-------|----|-------|-------|-------|
| 210 | S1       | 100k   | ordered    | 0.406 | 0.975 | 0.891 | 23 | 0.946 | 0.880 | 0.105 |
| 210 | S3       | 200k   | disordered | 0.227 | 0.924 | 0.786 | 0  | 0.000 | 0.000 | 0.000 |
| 211 | S1       | 50k    | ordered    | 0.473 | 0.974 | 0.893 | 82 | 0.941 | 0.865 | 0.151 |
| 211 | S3       | 50k    | disordered | 0.267 | 0.993 | 0.979 | 18 | 0.921 | 0.807 | 0.026 |
| 212 | S1       | 100k   | ordered    | 0.437 | 0.969 | 0.883 | 18 | 0.936 | 0.875 | 0.103 |
| 212 | S3       | 100k   | disordered | 0.250 | 0.981 | 0.922 | 9  | 0.899 | 0.841 | 0.035 |
| 213 | S1       | 50k    | ordered    | 0.443 | 0.987 | 0.947 | 94 | 0.939 | 0.872 | 0.134 |
| 213 | S3       | 200k   | disordered | 0.224 | 0.965 | 0.868 | 5  | 0.919 | 0.835 | 0.049 |
| 214 | S1       | 100k   | ordered    | 0.414 | 0.980 | 0.893 | 21 | 0.936 | 0.903 | 0.097 |
| 214 | S4       | 50k    | disordered | 0.336 | 0.987 | 0.953 | 59 | 0.938 | 0.867 | 0.093 |
| 215 | S1       | 50k    | ordered    | 0.451 | 0.995 | 0.975 | 76 | 0.941 | 0.879 | 0.118 |
| 215 | S4       | 50k    | disordered | 0.330 | 0.992 | 0.972 | 73 | 0.939 | 0.880 | 0.103 |
| 216 | S1       | 100k   | ordered    | 0.420 | 0.975 | 0.899 | 23 | 0.945 | 0.901 | 0.119 |
| 216 | S4       | 100k   | disordered | 0.356 | 0.969 | 0.868 | 15 | 0.942 | 0.890 | 0.094 |
| 217 | S1       | 50k    | ordered    | 0.490 | 0.992 | 0.963 | 79 | 0.951 | 0.907 | 0.180 |
| 217 | S4       | 50k    | disordered | 0.333 | 0.992 | 0.970 | 52 | 0.951 | 0.907 | 0.077 |
| 218 | S1       | 100k   | disordered | 0.499 | 0.974 | 0.870 | 22 | 0.964 | 0.925 | 0.175 |
| 218 | S4       | 50k    | ordered    | 0.300 | 0.994 | 0.972 | 63 | 0.911 | 0.800 | 0.080 |
| 219 | S1       | 50k    | ordered    | 0.381 | 0.994 | 0.974 | 73 | 0.948 | 0.903 | 0.113 |
| 219 | S4       | 100k   | disordered | 0.304 | 0.981 | 0.909 | 18 | 0.931 | 0.849 | 0.084 |
| 220 | S1       | 100k   | ordered    | 0.393 | 0.974 | 0.885 | 19 | 0.951 | 0.915 | 0.112 |
| 220 | S4       | 100k   | disordered | 0.208 | 0.966 | 0.890 | 0  | 0.000 | 0.000 | 0.000 |
| 221 | S1       | 50k    | ordered    | 0.401 | 0.994 | 0.972 | 77 | 0.949 | 0.893 | 0.111 |
| 221 | S4       | 50k    | disordered | 0.356 | 0.981 | 0.918 | 36 | 0.939 | 0.896 | 0.075 |
| 222 | S1       | 100k   | ordered    | 0.427 | 0.979 | 0.909 | 24 | 0.954 | 0.912 | 0.137 |
| 222 | S3       | 50k    | disordered | 0.342 | 0.981 | 0.917 | 11 | 0.907 | 0.832 | 0.048 |
| 223 | S1       | 50k    | ordered    | 0.422 | 0.990 | 0.957 | 61 | 0.949 | 0.888 | 0.147 |
| 223 | S3       | 100k   | disordered | 0.290 | 0.953 | 0.839 | 6  | 0.918 | 0.830 | 0.056 |
| 224 | S1       | 100k   | ordered    | 0.523 | 0.964 | 0.830 | 20 | 0.953 | 0.889 | 0.158 |
| 224 | S3       | 200k   | disordered | 0.206 | 0.952 | 0.825 | 3  | 0.912 | 0.790 | 0.042 |
| 225 | S1       | 50k    | ordered    | 0.573 | 0.974 | 0.888 | 56 | 0.958 | 0.920 | 0.212 |
| 225 | S3       | 50k    | disordered | 0.293 | 0.992 | 0.968 | 21 | 0.919 | 0.810 | 0.054 |
| 226 | S1       | 100k   | ordered    | 0.509 | 0.945 | 0.785 | 10 | 0.937 | 0.873 | 0.132 |
| 226 | S3       | 100k   | disordered | 0.289 | 0.976 | 0.896 | 2  | 0.980 | 0.963 | 0.012 |
| 227 | S1       | 50k    | ordered    | 0.445 | 0.987 | 0.950 | 51 | 0.947 | 0.877 | 0.132 |
| 227 | S3       | 200k   | disordered | 0.313 | 0.927 | 0.719 | 1  | 0.908 | 0.747 | 0.014 |
| 228 | S1       | 100k   | ordered    | 0.574 | 0.940 | 0.774 | 13 | 0.966 | 0.931 | 0.164 |
| 228 | S3       | 50k    | disordered | 0.261 | 0.994 | 0.976 | 28 | 0.928 | 0.841 | 0.038 |
| 229 | S1       | 50k    | ordered    | 0.443 | 0.990 | 0.954 | 71 | 0.948 | 0.888 | 0.140 |
| 229 | S3       | 100k   | disordered | 0.236 | 0.983 | 0.946 | 10 | 0.933 | 0.868 | 0.044 |
| 230 | S1       | 100k   | ordered    | 0.419 | 0.974 | 0.886 | 20 | 0.958 | 0.926 | 0.136 |
| 230 | S3       | 200k   | disordered | 0.227 | 0.901 | 0.717 | 3  | 0.935 | 0.874 | 0.061 |
| 231 | S1       | 50k    | ordered    | 0.442 | 0.993 | 0.965 | 61 | 0.954 | 0.921 | 0.115 |
| 231 | S3       | 50k    | disordered | 0.248 | 0.990 | 0.969 | 9  | 0.827 | 0.731 | 0.015 |
| 232 | S1       | 100k   | ordered    | 0.439 | 0.976 | 0.863 | 21 | 0.926 | 0.828 | 0.140 |
| 232 | S3       | 100k   | disordered | 0.254 | 0.976 | 0.901 | 4  | 0.886 | 0.851 | 0.021 |
| 233 | S1       | 50k    | ordered    | 0.308 | 0.993 | 0.974 | 72 | 0.945 | 0.900 | 0.095 |
| 233 | S3       | 200k   | disordered | 0.229 | 0.924 | 0.747 | 1  | 0.936 | 0.917 | 0.019 |
| 234 | S1       | 100k   | ordered    | 0.358 | 0.980 | 0.915 | 23 | 0.959 | 0.934 | 0.096 |
| 234 | S3       | 50k    | disordered | 0.283 | 0.992 | 0.955 | 12 | 0.931 | 0.825 | 0.032 |
| 235 | S1       | 100k   | ordered    | 0.274 | 0.981 | 0.918 | 13 | 0.935 | 0.862 | 0.066 |

| ID  | Material | Scales | Class      | O1    | O2    | O3    | L1  | L2    | L3    | L4    |
|-----|----------|--------|------------|-------|-------|-------|-----|-------|-------|-------|
| 235 | S3       | 100k   | disordered | 0.289 | 0.961 | 0.841 | 5   | 0.912 | 0.773 | 0.045 |
| 236 | S1       | 50k    | ordered    | 0.337 | 0.992 | 0.963 | 59  | 0.936 | 0.863 | 0.097 |
| 236 | S3       | 200k   | disordered | 0.228 | 0.903 | 0.733 | 1   | 0.912 | 0.787 | 0.017 |
| 237 | S1       | 100k   | ordered    | 0.408 | 0.971 | 0.872 | 23  | 0.928 | 0.812 | 0.138 |
| 237 | S3       | 50k    | disordered | 0.377 | 0.986 | 0.935 | 23  | 0.926 | 0.857 | 0.076 |
| 238 | S1       | 100k   | ordered    | 0.302 | 0.985 | 0.929 | 16  | 0.944 | 0.888 | 0.070 |
| 238 | S3       | 100k   | disordered | 0.269 | 0.938 | 0.794 | 4   | 0.858 | 0.587 | 0.068 |
| 239 | S1       | 50k    | ordered    | 0.336 | 0.993 | 0.962 | 46  | 0.942 | 0.891 | 0.077 |
| 239 | S3       | 200k   | disordered | 0.196 | 0.892 | 0.722 | 3   | 0.953 | 0.956 | 0.058 |
| 240 | S1       | 50k    | ordered    | 0.376 | 0.930 | 0.812 | 144 | 0.951 | 0.898 | 0.172 |
| 240 | S3       | 50k    | disordered | 0.296 | 0.990 | 0.965 | 21  | 0.919 | 0.825 | 0.046 |
| 241 | S1       | 100k   | ordered    | 0.351 | 0.924 | 0.797 | 48  | 0.938 | 0.888 | 0.158 |
| 241 | S3       | 100k   | disordered | 0.226 | 0.987 | 0.934 | 4   | 0.929 | 0.874 | 0.015 |
| 242 | S1       | 50k    | ordered    | 0.388 | 0.923 | 0.792 | 137 | 0.943 | 0.885 | 0.213 |
| 242 | S3       | 200k   | disordered | 0.218 | 0.920 | 0.711 | 1   | 0.786 | 0.442 | 0.028 |
| 243 | S1       | 100k   | ordered    | 0.355 | 0.947 | 0.817 | 34  | 0.947 | 0.875 | 0.159 |
| 243 | S3       | 50k    | disordered | 0.403 | 0.971 | 0.896 | 7   | 0.887 | 0.800 | 0.045 |
| 244 | S1       | 50k    | ordered    | 0.360 | 0.970 | 0.904 | 101 | 0.943 | 0.897 | 0.130 |
| 244 | S3       | 100k   | disordered | 0.340 | 0.954 | 0.808 | 8   | 0.916 | 0.830 | 0.100 |
| 245 | S1       | 100k   | ordered    | 0.303 | 0.967 | 0.878 | 34  | 0.927 | 0.829 | 0.102 |
| 245 | S3       | 200k   | disordered | 0.145 | 0.945 | 0.805 | 1   | 0.878 | 0.763 | 0.020 |
| 246 | S1       | 50k    | ordered    | 0.456 | 0.987 | 0.952 | 90  | 0.957 | 0.918 | 0.183 |
| 246 | S3       | 50k    | disordered | 0.271 | 0.989 | 0.943 | 8   | 0.840 | 0.705 | 0.026 |
| 247 | S1       | 100k   | ordered    | 0.444 | 0.969 | 0.852 | 20  | 0.964 | 0.928 | 0.142 |
| 247 | S3       | 100k   | disordered | 0.223 | 0.984 | 0.919 | 6   | 0.906 | 0.718 | 0.028 |
| 248 | S1       | 100k   | ordered    | 0.472 | 0.962 | 0.861 | 27  | 0.955 | 0.920 | 0.179 |
| 248 | S3       | 200k   | disordered | 0.238 | 0.953 | 0.813 | 4   | 0.884 | 0.678 | 0.059 |
| 249 | S1       | 50k    | ordered    | 0.276 | 0.988 | 0.960 | 48  | 0.933 | 0.856 | 0.066 |
| 249 | S3       | 50k    | disordered | 0.261 | 0.989 | 0.962 | 13  | 0.933 | 0.853 | 0.038 |
| 250 | S1       | 100k   | ordered    | 0.260 | 0.976 | 0.917 | 19  | 0.938 | 0.905 | 0.064 |
| 250 | S3       | 100k   | disordered | 0.240 | 0.965 | 0.860 | 6   | 0.867 | 0.728 | 0.048 |
| 251 | S1       | 50k    | ordered    | 0.405 | 0.992 | 0.968 | 86  | 0.952 | 0.915 | 0.133 |
| 252 | S1       | 100k   | ordered    | 0.347 | 0.977 | 0.906 | 17  | 0.958 | 0.921 | 0.092 |
| 253 | S1       | 100k   | ordered    | 0.525 | 0.944 | 0.783 | 19  | 0.943 | 0.859 | 0.167 |
| 254 | S1       | 100k   | ordered    | 0.549 | 0.958 | 0.824 | 21  | 0.966 | 0.946 | 0.191 |
| 255 | S1       | 100k   | ordered    | 0.560 | 0.935 | 0.777 | 18  | 0.962 | 0.920 | 0.238 |
| 256 | S1       | 50k    | ordered    | 0.396 | 0.994 | 0.963 | 58  | 0.948 | 0.885 | 0.114 |
| 257 | S1       | 100k   | ordered    | 0.450 | 0.970 | 0.901 | 19  | 0.956 | 0.909 | 0.115 |
| 258 | S1       | 50k    | ordered    | 0.424 | 0.991 | 0.961 | 75  | 0.944 | 0.890 | 0.134 |
| 259 | S1       | 50k    | ordered    | 0.382 | 0.992 | 0.976 | 80  | 0.949 | 0.885 | 0.131 |
| 260 | S1       | 100k   | ordered    | 0.368 | 0.956 | 0.859 | 15  | 0.960 | 0.935 | 0.126 |
| 261 | S1       | 50k    | ordered    | 0.410 | 0.987 | 0.945 | 90  | 0.946 | 0.904 | 0.135 |
| 262 | S1       | 100k   | ordered    | 0.362 | 0.980 | 0.917 | 20  | 0.937 | 0.870 | 0.095 |
| 263 | S1       | 50k    | ordered    | 0.356 | 0.992 | 0.959 | 54  | 0.945 | 0.873 | 0.097 |
| 264 | S1       | 100k   | ordered    | 0.360 | 0.966 | 0.842 | 10  | 0.910 | 0.786 | 0.080 |
| 265 | S1       | 50k    | ordered    | 0.378 | 0.989 | 0.965 | 64  | 0.951 | 0.895 | 0.093 |
| 266 | S1       | 100k   | ordered    | 0.304 | 0.979 | 0.903 | 15  | 0.962 | 0.932 | 0.078 |
| 267 | S1       | 50k    | ordered    | 0.413 | 0.989 | 0.955 | 71  | 0.944 | 0.896 | 0.112 |
| 268 | S1       | 100k   | ordered    | 0.402 | 0.981 | 0.931 | 23  | 0.940 | 0.893 | 0.100 |
| 269 | S1       | 50k    | ordered    | 0.409 | 0.986 | 0.947 | 67  | 0.946 | 0.871 | 0.106 |
| 270 | S1       | 100k   | ordered    | 0.366 | 0.971 | 0.904 | 14  | 0.958 | 0.942 | 0.065 |

| ID  | Material | Scales | Class   | O1    | O2    | O3    | L1 | L2    | L3    | L4    |
|-----|----------|--------|---------|-------|-------|-------|----|-------|-------|-------|
| 271 | S1       | 50k    | ordered | 0.415 | 0.986 | 0.949 | 76 | 0.951 | 0.897 | 0.133 |
| 272 | S1       | 100k   | ordered | 0.435 | 0.976 | 0.879 | 21 | 0.952 | 0.902 | 0.099 |
| 273 | S1       | 50k    | ordered | 0.422 | 0.992 | 0.962 | 74 | 0.949 | 0.902 | 0.143 |
| 274 | S1       | 50k    | ordered | 0.376 | 0.992 | 0.969 | 50 | 0.939 | 0.837 | 0.110 |
| 275 | S1       | 100k   | ordered | 0.373 | 0.965 | 0.891 | 26 | 0.945 | 0.888 | 0.175 |
| 276 | S1       | 100k   | ordered | 0.403 | 0.964 | 0.838 | 16 | 0.959 | 0.922 | 0.158 |
| 277 | S1       | 50k    | ordered | 0.417 | 0.992 | 0.958 | 59 | 0.952 | 0.911 | 0.152 |
| 278 | S1       | 50k    | ordered | 0.398 | 0.993 | 0.963 | 56 | 0.937 | 0.866 | 0.110 |
| 279 | S1       | 50k    | ordered | 0.400 | 0.989 | 0.954 | 71 | 0.945 | 0.884 | 0.119 |
| 280 | S1       | 50k    | ordered | 0.439 | 0.989 | 0.943 | 70 | 0.950 | 0.898 | 0.148 |
| 281 | S1       | 100k   | ordered | 0.459 | 0.951 | 0.838 | 23 | 0.950 | 0.896 | 0.210 |
| 282 | S1       | 50k    | ordered | 0.431 | 0.990 | 0.966 | 71 | 0.944 | 0.882 | 0.153 |
| 283 | S1       | 100k   | ordered | 0.372 | 0.982 | 0.888 | 24 | 0.952 | 0.930 | 0.143 |
| 284 | S1       | 50k    | ordered | 0.394 | 0.993 | 0.967 | 73 | 0.938 | 0.863 | 0.127 |
| 285 | S1       | 100k   | ordered | 0.407 | 0.970 | 0.872 | 25 | 0.934 | 0.871 | 0.156 |
| 286 | S1       | 50k    | ordered | 0.403 | 0.990 | 0.964 | 73 | 0.945 | 0.892 | 0.113 |
| 287 | S1       | 50k    | ordered | 0.409 | 0.994 | 0.972 | 80 | 0.942 | 0.886 | 0.127 |
| 288 | S1       | 50k    | ordered | 0.378 | 0.995 | 0.978 | 70 | 0.949 | 0.906 | 0.105 |
| 289 | S1       | 100k   | ordered | 0.391 | 0.981 | 0.904 | 23 | 0.960 | 0.917 | 0.124 |
| 290 | S1       | 50k    | ordered | 0.386 | 0.992 | 0.959 | 54 | 0.946 | 0.894 | 0.095 |
| 291 | S1       | 100k   | ordered | 0.341 | 0.975 | 0.895 | 13 | 0.944 | 0.907 | 0.082 |
| 292 | S1       | 50k    | ordered | 0.405 | 0.992 | 0.967 | 53 | 0.953 | 0.893 | 0.119 |
| 293 | S1       | 50k    | ordered | 0.371 | 0.992 | 0.973 | 79 | 0.950 | 0.897 | 0.114 |
| 294 | S1       | 100k   | ordered | 0.359 | 0.987 | 0.917 | 26 | 0.924 | 0.859 | 0.104 |
| 295 | S1       | 50k    | ordered | 0.437 | 0.990 | 0.955 | 72 | 0.955 | 0.920 | 0.134 |
| 296 | S1       | 100k   | ordered | 0.454 | 0.974 | 0.880 | 24 | 0.952 | 0.921 | 0.139 |
| 297 | S1       | 50k    | ordered | 0.439 | 0.992 | 0.962 | 69 | 0.951 | 0.887 | 0.126 |
| 298 | S1       | 100k   | ordered | 0.375 | 0.979 | 0.900 | 22 | 0.962 | 0.936 | 0.121 |
| 299 | S1       | 50k    | ordered | 0.381 | 0.994 | 0.974 | 72 | 0.942 | 0.883 | 0.104 |
| 300 | S1       | 100k   | ordered | 0.359 | 0.971 | 0.876 | 14 | 0.950 | 0.901 | 0.081 |
| 301 | S1       | 50k    | ordered | 0.343 | 0.994 | 0.972 | 61 | 0.943 | 0.884 | 0.073 |
| 302 | S1       | 50k    | ordered | 0.377 | 0.993 | 0.955 | 54 | 0.946 | 0.889 | 0.104 |
| 303 | S1       | 100k   | ordered | 0.321 | 0.981 | 0.917 | 15 | 0.968 | 0.950 | 0.080 |
| 304 | S1       | 50k    | ordered | 0.311 | 0.991 | 0.975 | 88 | 0.942 | 0.867 | 0.115 |
| 305 | S1       | 100k   | ordered | 0.337 | 0.969 | 0.871 | 26 | 0.965 | 0.941 | 0.134 |
| 306 | S1       | 50k    | ordered | 0.379 | 0.991 | 0.967 | 64 | 0.942 | 0.885 | 0.130 |
| 307 | S1       | 100k   | ordered | 0.440 | 0.971 | 0.866 | 23 | 0.953 | 0.919 | 0.162 |
| 308 | S1       | 50k    | ordered | 0.433 | 0.989 | 0.943 | 54 | 0.947 | 0.913 | 0.160 |
| 309 | S1       | 100k   | ordered | 0.406 | 0.938 | 0.784 | 8  | 0.965 | 0.951 | 0.107 |
| 310 | S1       | 50k    | ordered | 0.414 | 0.974 | 0.892 | 41 | 0.958 | 0.885 | 0.188 |
| 311 | S1       | 100k   | ordered | 0.320 | 0.933 | 0.749 | 7  | 0.982 | 0.963 | 0.111 |
| 312 | S1       | 50k    | ordered | 0.482 | 0.986 | 0.943 | 50 | 0.951 | 0.904 | 0.201 |
| 313 | S1       | 100k   | ordered | 0.525 | 0.917 | 0.754 | 10 | 0.960 | 0.932 | 0.223 |
| 314 | S1       | 100k   | ordered | 0.495 | 0.965 | 0.836 | 20 | 0.943 | 0.899 | 0.186 |
| 315 | S1       | 50k    | ordered | 0.383 | 0.989 | 0.949 | 53 | 0.935 | 0.871 | 0.148 |
| 316 | S1       | 100k   | ordered | 0.587 | 0.931 | 0.798 | 23 | 0.961 | 0.936 | 0.350 |
| 317 | S1       | 50k    | ordered | 0.435 | 0.980 | 0.910 | 42 | 0.947 | 0.897 | 0.167 |
| 318 | S1       | 100k   | ordered | 0.432 | 0.949 | 0.837 | 15 | 0.942 | 0.872 | 0.151 |
| 319 | S1       | 50k    | ordered | 0.462 | 0.986 | 0.935 | 50 | 0.954 | 0.878 | 0.180 |
| 320 | S1       | 100k   | ordered | 0.418 | 0.942 | 0.786 | 3  | 0.947 | 0.918 | 0.038 |
| 321 | S1       | 50k    | ordered | 0.421 | 0.962 | 0.881 | 99 | 0.946 | 0.884 | 0.160 |



| ID  | Material | Scales | Class   | O1    | O2    | O3    | L1 | L2    | L3    | L4    |
|-----|----------|--------|---------|-------|-------|-------|----|-------|-------|-------|
| 322 | S1       | 100k   | ordered | 0.341 | 0.960 | 0.862 | 15 | 0.946 | 0.918 | 0.089 |
| 323 | S1       | 50k    | ordered | 0.449 | 0.991 | 0.953 | 82 | 0.939 | 0.869 | 0.137 |
| 324 | S1       | 100k   | ordered | 0.430 | 0.974 | 0.889 | 17 | 0.944 | 0.897 | 0.121 |
| 325 | S2       | 100k   | ordered | 0.526 | 0.903 | 0.675 | 9  | 0.958 | 0.940 | 0.188 |
| 326 | S2       | 50k    | ordered | 0.401 | 0.985 | 0.933 | 42 | 0.936 | 0.865 | 0.133 |
| 327 | S2       | 50k    | ordered | 0.469 | 0.979 | 0.893 | 35 | 0.954 | 0.913 | 0.152 |
| 328 | S2       | 50k    | ordered | 0.463 | 0.972 | 0.861 | 39 | 0.943 | 0.898 | 0.191 |
| 329 | S2       | 100k   | ordered | 0.531 | 0.918 | 0.700 | 8  | 0.959 | 0.930 | 0.158 |
| 330 | S2       | 50k    | ordered | 0.422 | 0.964 | 0.884 | 53 | 0.945 | 0.902 | 0.160 |
| 331 | S2       | 100k   | ordered | 0.436 | 0.908 | 0.760 | 10 | 0.958 | 0.931 | 0.174 |
| 332 | S2       | 50k    | ordered | 0.426 | 0.975 | 0.910 | 36 | 0.949 | 0.913 | 0.168 |
| 333 | S2       | 50k    | ordered | 0.479 | 0.940 | 0.815 | 83 | 0.945 | 0.888 | 0.222 |
| 334 | S2       | 50k    | ordered | 0.416 | 0.978 | 0.917 | 26 | 0.939 | 0.871 | 0.096 |
| 335 | S2       | 50k    | ordered | 0.496 | 0.985 | 0.923 | 40 | 0.939 | 0.880 | 0.150 |
| 336 | S2       | 50k    | ordered | 0.445 | 0.982 | 0.915 | 42 | 0.948 | 0.911 | 0.166 |
| 337 | S2       | 100k   | ordered | 0.427 | 0.958 | 0.839 | 10 | 0.967 | 0.945 | 0.106 |
| 338 | S2       | 50k    | ordered | 0.484 | 0.978 | 0.913 | 47 | 0.955 | 0.924 | 0.179 |
| 339 | S2       | 100k   | ordered | 0.529 | 0.948 | 0.797 | 16 | 0.944 | 0.899 | 0.183 |
| 340 | S2       | 50k    | ordered | 0.384 | 0.986 | 0.951 | 42 | 0.930 | 0.844 | 0.100 |
| 341 | S2       | 100k   | ordered | 0.388 | 0.959 | 0.844 | 6  | 0.933 | 0.893 | 0.054 |
| 342 | S2       | 50k    | ordered | 0.473 | 0.974 | 0.902 | 42 | 0.935 | 0.830 | 0.165 |
| 343 | S2       | 100k   | ordered | 0.464 | 0.939 | 0.778 | 16 | 0.954 | 0.904 | 0.172 |
| 344 | S2       | 50k    | ordered | 0.388 | 0.986 | 0.932 | 25 | 0.922 | 0.818 | 0.106 |
| 345 | S2       | 100k   | ordered | 0.346 | 0.957 | 0.811 | 10 | 0.937 | 0.876 | 0.099 |
| 346 | S2       | 50k    | ordered | 0.431 | 0.984 | 0.941 | 44 | 0.949 | 0.883 | 0.159 |
| 347 | S2       | 50k    | ordered | 0.518 | 0.976 | 0.893 | 32 | 0.960 | 0.921 | 0.168 |
| 348 | S2       | 100k   | ordered | 0.511 | 0.928 | 0.731 | 8  | 0.968 | 0.944 | 0.129 |
| 349 | S2       | 50k    | ordered | 0.492 | 0.974 | 0.878 | 49 | 0.952 | 0.916 | 0.189 |
| 350 | S2       | 100k   | ordered | 0.594 | 0.923 | 0.723 | 14 | 0.955 | 0.928 | 0.249 |
| 351 | S2       | 50k    | ordered | 0.447 | 0.973 | 0.887 | 34 | 0.947 | 0.903 | 0.143 |
| 352 | S2       | 100k   | ordered | 0.388 | 0.937 | 0.747 | 8  | 0.947 | 0.906 | 0.102 |
| 353 | S2       | 50k    | ordered | 0.497 | 0.973 | 0.895 | 46 | 0.946 | 0.896 | 0.207 |
| 354 | S2       | 50k    | ordered | 0.435 | 0.982 | 0.916 | 42 | 0.959 | 0.915 | 0.165 |
| 355 | S2       | 100k   | ordered | 0.523 | 0.909 | 0.629 | 7  | 0.958 | 0.929 | 0.192 |
| 356 | S2       | 100k   | ordered | 0.628 | 0.909 | 0.740 | 13 | 0.956 | 0.879 | 0.327 |
| 357 | S2       | 50k    | ordered | 0.452 | 0.988 | 0.934 | 34 | 0.941 | 0.907 | 0.116 |
| 358 | S2       | 100k   | ordered | 0.372 | 0.955 | 0.835 | 11 | 0.913 | 0.781 | 0.119 |
| 359 | S2       | 50k    | ordered | 0.443 | 0.986 | 0.935 | 29 | 0.945 | 0.902 | 0.102 |
| 360 | S2       | 100k   | ordered | 0.461 | 0.937 | 0.747 | 8  | 0.945 | 0.916 | 0.142 |
| 361 | S2       | 50k    | ordered | 0.512 | 0.978 | 0.909 | 31 | 0.951 | 0.901 | 0.148 |
| 362 | S2       | 100k   | ordered | 0.463 | 0.941 | 0.738 | 10 | 0.958 | 0.925 | 0.133 |
| 363 | S2       | 50k    | ordered | 0.433 | 0.988 | 0.960 | 46 | 0.944 | 0.893 | 0.137 |
| 364 | S2       | 100k   | ordered | 0.402 | 0.957 | 0.833 | 13 | 0.949 | 0.892 | 0.121 |
| 365 | S2       | 50k    | ordered | 0.471 | 0.981 | 0.939 | 49 | 0.947 | 0.869 | 0.146 |
| 366 | S2       | 100k   | ordered | 0.431 | 0.944 | 0.766 | 9  | 0.951 | 0.884 | 0.118 |
| 367 | S2       | 50k    | ordered | 0.474 | 0.967 | 0.896 | 38 | 0.938 | 0.889 | 0.139 |
| 368 | S2       | 100k   | ordered | 0.454 | 0.921 | 0.733 | 15 | 0.956 | 0.936 | 0.161 |
| 369 | S2       | 50k    | ordered | 0.573 | 0.976 | 0.875 | 36 | 0.965 | 0.901 | 0.271 |
| 370 | S2       | 100k   | ordered | 0.778 | 0.874 | 0.625 | 5  | 0.976 | 0.925 | 0.352 |
| 371 | S1       | 100k   | ordered | 0.303 | 0.969 | 0.885 | 10 | 0.929 | 0.868 | 0.074 |
| 372 | S1       | 100k   | ordered | 0.282 | 0.976 | 0.877 | 9  | 0.948 | 0.873 | 0.074 |

| ID  | Material | Scales | Class   | O1    | O2    | O3    | L1 | L2    | L3    | L4    |
|-----|----------|--------|---------|-------|-------|-------|----|-------|-------|-------|
| 373 | S1       | 50k    | ordered | 0.423 | 0.979 | 0.936 | 53 | 0.947 | 0.893 | 0.126 |
| 374 | S1       | 100k   | ordered | 0.336 | 0.954 | 0.847 | 6  | 0.975 | 0.965 | 0.060 |
| 375 | S1       | 50k    | ordered | 0.410 | 0.990 | 0.952 | 85 | 0.939 | 0.882 | 0.139 |
| 376 | S1       | 100k   | ordered | 0.431 | 0.974 | 0.885 | 18 | 0.947 | 0.901 | 0.111 |
| 377 | S1       | 50k    | ordered | 0.476 | 0.985 | 0.936 | 67 | 0.939 | 0.866 | 0.144 |
| 378 | S1       | 100k   | ordered | 0.429 | 0.969 | 0.871 | 16 | 0.955 | 0.917 | 0.123 |
| 379 | S1       | 100k   | ordered | 0.389 | 0.971 | 0.894 | 22 | 0.944 | 0.884 | 0.119 |
| 380 | S1       | 50k    | ordered | 0.399 | 0.994 | 0.978 | 82 | 0.935 | 0.837 | 0.125 |
| 381 | S1       | 50k    | ordered | 0.452 | 0.990 | 0.963 | 80 | 0.940 | 0.881 | 0.155 |
| 382 | S1       | 100k   | ordered | 0.436 | 0.973 | 0.861 | 21 | 0.944 | 0.884 | 0.150 |
| 383 | S1       | 50k    | ordered | 0.476 | 0.988 | 0.955 | 57 | 0.947 | 0.901 | 0.121 |
| 384 | S1       | 100k   | ordered | 0.393 | 0.963 | 0.865 | 16 | 0.964 | 0.936 | 0.122 |
| 385 | S1       | 50k    | ordered | 0.409 | 0.992 | 0.958 | 63 | 0.934 | 0.858 | 0.117 |
| 386 | S1       | 100k   | ordered | 0.433 | 0.979 | 0.888 | 20 | 0.948 | 0.882 | 0.121 |
| 387 | S1       | 50k    | ordered | 0.428 | 0.992 | 0.964 | 62 | 0.940 | 0.879 | 0.121 |
| 388 | S1       | 100k   | ordered | 0.493 | 0.964 | 0.866 | 20 | 0.933 | 0.872 | 0.153 |
| 389 | S2       | 50k    | ordered | 0.371 | 0.988 | 0.941 | 29 | 0.929 | 0.880 | 0.082 |
| 390 | S2       | 100k   | ordered | 0.487 | 0.875 | 0.578 | 7  | 0.972 | 0.965 | 0.179 |
| 391 | S2       | 50k    | ordered | 0.367 | 0.989 | 0.946 | 29 | 0.930 | 0.874 | 0.079 |
| 392 | S2       | 100k   | ordered | 0.391 | 0.948 | 0.826 | 11 | 0.945 | 0.909 | 0.093 |
| 393 | S2       | 50k    | ordered | 0.360 | 0.992 | 0.953 | 44 | 0.938 | 0.893 | 0.100 |
| 394 | S2       | 100k   | ordered | 0.403 | 0.961 | 0.858 | 12 | 0.915 | 0.831 | 0.100 |
| 395 | S2       | 50k    | ordered | 0.425 | 0.984 | 0.931 | 27 | 0.948 | 0.918 | 0.081 |
| 396 | S2       | 100k   | ordered | 0.364 | 0.957 | 0.796 | 9  | 0.912 | 0.811 | 0.099 |
| 397 | S2       | 100k   | ordered | 0.340 | 0.943 | 0.769 | 8  | 0.955 | 0.922 | 0.133 |
| 398 | S2       | 50k    | ordered | 0.416 | 0.985 | 0.940 | 33 | 0.937 | 0.866 | 0.111 |
| 399 | S2       | 100k   | ordered | 0.402 | 0.920 | 0.778 | 10 | 0.964 | 0.936 | 0.122 |
| 400 | S2       | 50k    | ordered | 0.389 | 0.987 | 0.935 | 18 | 0.915 | 0.803 | 0.053 |
| 401 | S2       | 100k   | ordered | 0.302 | 0.967 | 0.836 | 5  | 0.956 | 0.942 | 0.044 |
| 402 | S2       | 50k    | ordered | 0.430 | 0.986 | 0.933 | 36 | 0.928 | 0.875 | 0.091 |
| 403 | S2       | 100k   | ordered | 0.441 | 0.963 | 0.831 | 7  | 0.920 | 0.876 | 0.074 |
| 404 | S2       | 50k    | ordered | 0.419 | 0.981 | 0.930 | 26 | 0.902 | 0.815 | 0.056 |
| 405 | S2       | 100k   | ordered | 0.372 | 0.949 | 0.840 | 5  | 0.941 | 0.885 | 0.042 |
| 406 | S1       | 200k   | ordered | 0.462 | 0.903 | 0.654 | 7  | 0.964 | 0.924 | 0.190 |
| 407 | S1       | 200k   | ordered | 0.354 | 0.880 | 0.682 | 4  | 0.908 | 0.822 | 0.115 |
| 408 | S1       | 200k   | ordered | 0.452 | 0.885 | 0.693 | 4  | 0.904 | 0.824 | 0.083 |
| 409 | S1       | 200k   | ordered | 0.423 | 0.788 | 0.478 | 2  | 0.955 | 0.936 | 0.123 |
| 410 | S1       | 200k   | ordered | 0.361 | 0.866 | 0.631 | 5  | 0.959 | 0.905 | 0.155 |
| 411 | S1       | 200k   | ordered | 0.256 | 0.812 | 0.599 | 2  | 0.965 | 0.917 | 0.092 |
| 412 | S1       | 200k   | ordered | 0.317 | 0.870 | 0.673 | 4  | 0.973 | 0.962 | 0.084 |
| 413 | S1       | 200k   | ordered | 0.345 | 0.899 | 0.686 | 3  | 0.968 | 0.911 | 0.082 |
| 414 | S1       | 200k   | ordered | 0.325 | 0.822 | 0.449 | 1  | 0.908 | 0.868 | 0.038 |
| 415 | S1       | 50k    | ordered | 0.387 | 0.968 | 0.871 | 67 | 0.946 | 0.892 | 0.151 |
| 416 | S1       | 100k   | ordered | 0.372 | 0.937 | 0.772 | 16 | 0.950 | 0.904 | 0.124 |
| 417 | S1       | 200k   | ordered | 0.361 | 0.909 | 0.713 | 5  | 0.960 | 0.922 | 0.093 |
| 418 | S1       | 200k   | ordered | 0.440 | 0.865 | 0.616 | 4  | 0.947 | 0.885 | 0.112 |
| 419 | S1       | 200k   | ordered | 0.468 | 0.878 | 0.634 | 6  | 0.969 | 0.962 | 0.146 |
| 420 | S1       | 200k   | ordered | 0.457 | 0.855 | 0.643 | 2  | 0.981 | 0.968 | 0.066 |
| 421 | S1       | 200k   | ordered | 0.316 | 0.843 | 0.612 | 1  | 0.942 | 0.900 | 0.038 |
| 422 | S1       | 200k   | ordered | 0.467 | 0.878 | 0.666 | 4  | 0.969 | 0.966 | 0.138 |
| 423 | S1       | 200k   | ordered | 0.413 | 0.824 | 0.550 | 6  | 0.964 | 0.943 | 0.202 |

| ID  | Material | Scales | Class   | O1    | O2    | O3    | L1 | L2    | L3    | L4    |
|-----|----------|--------|---------|-------|-------|-------|----|-------|-------|-------|
| 424 | S1       | 200k   | ordered | 0.434 | 0.904 | 0.706 | 8  | 0.942 | 0.906 | 0.157 |
| 425 | S1       | 200k   | ordered | 0.328 | 0.918 | 0.670 | 3  | 0.900 | 0.766 | 0.060 |
| 426 | S1       | 200k   | ordered | 0.344 | 0.887 | 0.668 | 3  | 0.971 | 0.948 | 0.086 |
| 427 | S1       | 200k   | ordered | 0.450 | 0.835 | 0.641 | 4  | 0.961 | 0.939 | 0.130 |
| 428 | S1       | 200k   | ordered | 0.206 | 0.876 | 0.639 | 2  | 0.932 | 0.897 | 0.043 |
| 429 | S1       | 200k   | ordered | 0.252 | 0.829 | 0.617 | 3  | 0.970 | 0.955 | 0.088 |
| 430 | S1       | 200k   | ordered | 0.289 | 0.864 | 0.634 | 3  | 0.968 | 0.956 | 0.073 |
| 431 | S1       | 200k   | ordered | 0.306 | 0.868 | 0.654 | 5  | 0.970 | 0.960 | 0.107 |
| 432 | S1       | 200k   | ordered | 0.432 | 0.867 | 0.569 | 4  | 0.981 | 0.978 | 0.128 |
| 433 | S1       | 200k   | ordered | 0.374 | 0.888 | 0.673 | 3  | 0.904 | 0.793 | 0.074 |
| 434 | S1       | 200k   | ordered | 0.518 | 0.812 | 0.542 | 6  | 0.931 | 0.581 | 0.254 |
| 435 | S1       | 200k   | ordered | 0.470 | 0.751 | 0.488 | 1  | 0.964 | 0.954 | 0.064 |
| 436 | S1       | 200k   | ordered | 0.390 | 0.875 | 0.637 | 4  | 0.953 | 0.923 | 0.106 |
| 437 | S1       | 200k   | ordered | 0.429 | 0.841 | 0.601 | 2  | 0.954 | 0.953 | 0.078 |
| 438 | S1       | 50k    | ordered | 0.475 | 0.990 | 0.943 | 57 | 0.959 | 0.924 | 0.173 |
| 439 | S1       | 100k   | ordered | 0.446 | 0.966 | 0.861 | 17 | 0.958 | 0.928 | 0.136 |
| 440 | S1       | 50k    | ordered | 0.428 | 0.984 | 0.955 | 69 | 0.951 | 0.907 | 0.151 |
| 441 | S1       | 100k   | ordered | 0.432 | 0.960 | 0.879 | 19 | 0.959 | 0.941 | 0.131 |
| 442 | S1       | 100k   | ordered | 0.389 | 0.956 | 0.861 | 30 | 0.953 | 0.921 | 0.162 |
| 443 | S1       | 200k   | ordered | 0.350 | 0.870 | 0.694 | 5  | 0.968 | 0.962 | 0.086 |
| 444 | S1       | 200k   | ordered | 0.408 | 0.854 | 0.633 | 1  | 0.964 | 0.901 | 0.025 |
| 445 | S1       | 200k   | ordered | 0.406 | 0.818 | 0.586 | 5  | 0.974 | 0.965 | 0.192 |
| 446 | S1       | 200k   | ordered | 0.466 | 0.810 | 0.599 | 4  | 0.968 | 0.954 | 0.187 |
| 447 | S1       | 200k   | ordered | 0.440 | 0.808 | 0.552 | 5  | 0.961 | 0.950 | 0.183 |
| 448 | S1       | 200k   | ordered | 0.411 | 0.864 | 0.613 | 5  | 0.952 | 0.934 | 0.108 |
| 449 | S1       | 200k   | ordered | 0.477 | 0.881 | 0.602 | 5  | 0.980 | 0.971 | 0.153 |
| 450 | S1       | 200k   | ordered | 0.357 | 0.945 | 0.780 | 6  | 0.933 | 0.873 | 0.077 |
| 451 | S1       | 200k   | ordered | 0.226 | 0.898 | 0.712 | 3  | 0.947 | 0.925 | 0.063 |
| 452 | S1       | 200k   | ordered | 0.349 | 0.891 | 0.622 | 5  | 0.975 | 0.959 | 0.143 |
| 453 | S1       | 200k   | ordered | 0.639 | 0.725 | 0.552 | 6  | 0.972 | 0.954 | 0.413 |
| 454 | S1       | 200k   | ordered | 0.413 | 0.858 | 0.678 | 11 | 0.940 | 0.894 | 0.223 |
| 455 | S1       | 200k   | ordered | 0.491 | 0.806 | 0.531 | 3  | 0.950 | 0.941 | 0.183 |
| 456 | S1       | 200k   | ordered | 0.597 | 0.748 | 0.579 | 9  | 0.960 | 0.925 | 0.344 |
| 457 | S1       | 50k    | ordered | 0.436 | 0.989 | 0.952 | 45 | 0.948 | 0.908 | 0.140 |
| 458 | S1       | 100k   | ordered | 0.396 | 0.973 | 0.878 | 18 | 0.954 | 0.903 | 0.105 |
| 459 | S1       | 200k   | ordered | 0.352 | 0.925 | 0.702 | 3  | 0.950 | 0.920 | 0.062 |
| 460 | S1       | 200k   | ordered | 0.545 | 0.884 | 0.589 | 5  | 0.888 | 0.733 | 0.165 |
| 461 | S1       | 200k   | ordered | 0.394 | 0.870 | 0.632 | 4  | 0.968 | 0.950 | 0.110 |
| 462 | S1       | 200k   | ordered | 0.590 | 0.882 | 0.675 | 8  | 0.964 | 0.936 | 0.286 |
| 463 | S1       | 200k   | ordered | 0.327 | 0.899 | 0.717 | 2  | 0.963 | 0.931 | 0.051 |
| 464 | S1       | 200k   | ordered | 0.198 | 0.874 | 0.676 | 0  | 0.000 | 0.000 | 0.000 |
| 465 | S1       | 200k   | ordered | 0.572 | 0.771 | 0.532 | 3  | 0.945 | 0.806 | 0.203 |
| 466 | S1       | 200k   | ordered | 0.554 | 0.802 | 0.604 | 6  | 0.967 | 0.949 | 0.251 |
| 467 | S1       | 200k   | ordered | 0.532 | 0.821 | 0.550 | 7  | 0.945 | 0.890 | 0.257 |
| 468 | S1       | 200k   | ordered | 0.403 | 0.884 | 0.675 | 5  | 0.963 | 0.922 | 0.123 |
| 469 | S1       | 200k   | ordered | 0.511 | 0.827 | 0.604 | 4  | 0.953 | 0.939 | 0.153 |
| 470 | S1       | 200k   | ordered | 0.736 | 0.602 | 0.343 | 4  | 0.970 | 0.958 | 0.460 |
| 471 | S1       | 200k   | ordered | 0.569 | 0.782 | 0.482 | 5  | 0.947 | 0.904 | 0.363 |
| 472 | S1       | 200k   | ordered | 0.497 | 0.835 | 0.587 | 3  | 0.956 | 0.944 | 0.114 |
| 473 | S1       | 200k   | ordered | 0.464 | 0.839 | 0.572 | 4  | 0.957 | 0.918 | 0.165 |
| 474 | S1       | 200k   | ordered | 0.285 | 0.902 | 0.717 | 7  | 0.959 | 0.930 | 0.152 |

| ID  | Material | Scales | Class   | O1    | O2    | O3    | L1  | L2    | L3    | L4    |
|-----|----------|--------|---------|-------|-------|-------|-----|-------|-------|-------|
| 475 | S1       | 200k   | ordered | 0.508 | 0.858 | 0.627 | 10  | 0.957 | 0.921 | 0.259 |
| 476 | S1       | 200k   | ordered | 0.566 | 0.763 | 0.584 | 6   | 0.953 | 0.905 | 0.250 |
| 477 | S1       | 200k   | ordered | 0.257 | 0.865 | 0.592 | 2   | 0.906 | 0.845 | 0.057 |
| 478 | S1       | 200k   | ordered | 0.416 | 0.857 | 0.602 | 5   | 0.962 | 0.934 | 0.146 |
| 479 | S1       | 200k   | ordered | 0.524 | 0.778 | 0.532 | 2   | 0.978 | 0.973 | 0.092 |
| 480 | S1       | 200k   | ordered | 0.466 | 0.904 | 0.707 | 7   | 0.975 | 0.950 | 0.149 |
| 481 | S1       | 50k    | ordered | 0.333 | 0.990 | 0.968 | 80  | 0.934 | 0.860 | 0.124 |
| 482 | S1       | 100k   | ordered | 0.334 | 0.982 | 0.919 | 23  | 0.937 | 0.869 | 0.096 |
| 483 | S1       | 50k    | ordered | 0.407 | 0.988 | 0.954 | 78  | 0.949 | 0.910 | 0.139 |
| 484 | S1       | 100k   | ordered | 0.392 | 0.979 | 0.904 | 26  | 0.956 | 0.916 | 0.133 |
| 485 | S1       | 200k   | ordered | 0.454 | 0.909 | 0.710 | 7   | 0.968 | 0.936 | 0.137 |
| 486 | S1       | 50k    | ordered | 0.472 | 0.988 | 0.952 | 78  | 0.960 | 0.903 | 0.192 |
| 487 | S1       | 100k   | ordered | 0.415 | 0.962 | 0.814 | 23  | 0.959 | 0.925 | 0.171 |
| 488 | S1       | 200k   | ordered | 0.400 | 0.749 | 0.508 | 7   | 0.957 | 0.931 | 0.301 |
| 489 | S1       | 50k    | ordered | 0.394 | 0.989 | 0.955 | 55  | 0.951 | 0.915 | 0.116 |
| 490 | S1       | 100k   | ordered | 0.403 | 0.977 | 0.891 | 21  | 0.953 | 0.913 | 0.127 |
| 491 | S1       | 200k   | ordered | 0.429 | 0.909 | 0.659 | 5   | 0.953 | 0.883 | 0.130 |
| 492 | S1       | 50k    | ordered | 0.409 | 0.985 | 0.921 | 44  | 0.946 | 0.892 | 0.137 |
| 493 | S1       | 100k   | ordered | 0.333 | 0.930 | 0.730 | 11  | 0.966 | 0.952 | 0.122 |
| 494 | S1       | 200k   | ordered | 0.413 | 0.858 | 0.556 | 4   | 0.957 | 0.942 | 0.135 |
| 495 | S1       | 50k    | ordered | 0.495 | 0.972 | 0.905 | 73  | 0.952 | 0.879 | 0.197 |
| 496 | S1       | 100k   | ordered | 0.497 | 0.923 | 0.781 | 22  | 0.966 | 0.941 | 0.199 |
| 497 | S1       | 200k   | ordered | 0.548 | 0.770 | 0.510 | 5   | 0.965 | 0.957 | 0.206 |
| 498 | S1       | 50k    | ordered | 0.430 | 0.937 | 0.802 | 136 | 0.950 | 0.876 | 0.205 |
| 499 | S1       | 100k   | ordered | 0.439 | 0.917 | 0.691 | 46  | 0.951 | 0.911 | 0.223 |
| 500 | S1       | 200k   | ordered | 0.410 | 0.884 | 0.586 | 6   | 0.951 | 0.897 | 0.149 |
| 501 | S1       | 50k    | ordered | 0.370 | 0.990 | 0.947 | 55  | 0.958 | 0.922 | 0.151 |
| 502 | S1       | 100k   | ordered | 0.421 | 0.929 | 0.723 | 8   | 0.960 | 0.931 | 0.173 |
| 503 | S1       | 200k   | ordered | 0.428 | 0.718 | 0.471 | 1   | 0.971 | 0.965 | 0.121 |
| 504 | S1       | 50k    | ordered | 0.517 | 0.980 | 0.914 | 80  | 0.964 | 0.934 | 0.256 |
| 505 | S1       | 100k   | ordered | 0.596 | 0.930 | 0.719 | 24  | 0.972 | 0.942 | 0.332 |
| 506 | S1       | 200k   | ordered | 0.484 | 0.876 | 0.636 | 3   | 0.962 | 0.911 | 0.151 |
| 507 | S1       | 50k    | ordered | 0.412 | 0.993 | 0.964 | 94  | 0.941 | 0.891 | 0.147 |
| 508 | S1       | 100k   | ordered | 0.408 | 0.980 | 0.883 | 22  | 0.959 | 0.928 | 0.101 |
| 509 | S1       | 200k   | ordered | 0.364 | 0.905 | 0.705 | 1   | 0.855 | 0.331 | 0.019 |
| 510 | S1       | 100k   | ordered | 0.610 | 0.907 | 0.725 | 22  | 0.963 | 0.935 | 0.277 |
| 511 | S1       | 200k   | ordered | 0.710 | 0.812 | 0.576 | 8   | 0.974 | 0.957 | 0.349 |
| 512 | S1       | 200k   | ordered | 0.512 | 0.789 | 0.539 | 3   | 0.953 | 0.917 | 0.120 |
| 513 | S1       | 200k   | ordered | 0.429 | 0.855 | 0.592 | 4   | 0.971 | 0.966 | 0.134 |
| 514 | S1       | 200k   | ordered | 0.423 | 0.897 | 0.653 | 4   | 0.939 | 0.874 | 0.113 |
| 515 | S1       | 200k   | ordered | 0.469 | 0.771 | 0.533 | 4   | 0.976 | 0.966 | 0.209 |
| 516 | S1       | 200k   | ordered | 0.253 | 0.828 | 0.644 | 3   | 0.966 | 0.946 | 0.112 |
| 517 | S1       | 200k   | ordered | 0.425 | 0.817 | 0.605 | 4   | 0.957 | 0.931 | 0.133 |
| 518 | S1       | 200k   | ordered | 0.479 | 0.850 | 0.519 | 0   | 0.000 | 0.000 | 0.000 |
| 519 | S1       | 200k   | ordered | 0.265 | 0.921 | 0.764 | 9   | 0.921 | 0.812 | 0.101 |
| 520 | S1       | 200k   | ordered | 0.297 | 0.927 | 0.732 | 5   | 0.924 | 0.863 | 0.084 |
| 521 | S1       | 200k   | ordered | 0.367 | 0.897 | 0.646 | 2   | 0.920 | 0.879 | 0.052 |
| 522 | S1       | 200k   | ordered | 0.452 | 0.910 | 0.683 | 4   | 0.940 | 0.882 | 0.155 |
| 523 | S1       | 200k   | ordered | 0.411 | 0.898 | 0.681 | 4   | 0.940 | 0.911 | 0.115 |
| 524 | S1       | 200k   | ordered | 0.419 | 0.869 | 0.663 | 4   | 0.937 | 0.870 | 0.099 |
| 525 | S1       | 200k   | ordered | 0.337 | 0.865 | 0.581 | 5   | 0.958 | 0.914 | 0.161 |

| ID  | Material | Scales | Class   | O1    | O2    | O3    | L1 | L2    | L3    | L4    |
|-----|----------|--------|---------|-------|-------|-------|----|-------|-------|-------|
| 526 | S1       | 200k   | ordered | 0.360 | 0.861 | 0.597 | 3  | 0.975 | 0.963 | 0.084 |
| 527 | S1       | 200k   | ordered | 0.346 | 0.933 | 0.751 | 6  | 0.920 | 0.803 | 0.097 |
| 528 | S1       | 200k   | ordered | 0.588 | 0.880 | 0.654 | 5  | 0.950 | 0.922 | 0.188 |
| 529 | S1       | 200k   | ordered | 0.560 | 0.885 | 0.672 | 6  | 0.936 | 0.754 | 0.180 |
| 530 | S1       | 200k   | ordered | 0.341 | 0.944 | 0.746 | 5  | 0.933 | 0.806 | 0.105 |
| 531 | S1       | 200k   | ordered | 0.361 | 0.941 | 0.746 | 8  | 0.901 | 0.817 | 0.095 |
| 532 | S1       | 50k    | ordered | 0.434 | 0.990 | 0.959 | 70 | 0.945 | 0.894 | 0.138 |
| 533 | S1       | 100k   | ordered | 0.441 | 0.970 | 0.848 | 23 | 0.952 | 0.907 | 0.140 |
| 534 | S1       | 200k   | ordered | 0.408 | 0.925 | 0.713 | 6  | 0.965 | 0.952 | 0.118 |
| 535 | S1       | 50k    | ordered | 0.490 | 0.989 | 0.945 | 65 | 0.961 | 0.931 | 0.188 |
| 536 | S1       | 100k   | ordered | 0.430 | 0.974 | 0.851 | 17 | 0.948 | 0.906 | 0.134 |
| 537 | S1       | 50k    | ordered | 0.501 | 0.991 | 0.948 | 64 | 0.949 | 0.901 | 0.182 |
| 538 | S1       | 100k   | ordered | 0.414 | 0.955 | 0.840 | 11 | 0.952 | 0.915 | 0.116 |
| 539 | S1       | 50k    | ordered | 0.444 | 0.987 | 0.947 | 61 | 0.953 | 0.905 | 0.138 |
| 540 | S1       | 50k    | ordered | 0.445 | 0.970 | 0.926 | 56 | 0.959 | 0.926 | 0.182 |
| 541 | S1       | 100k   | ordered | 0.360 | 0.959 | 0.853 | 27 | 0.945 | 0.896 | 0.160 |
| 542 | S1       | 200k   | ordered | 0.268 | 0.918 | 0.751 | 6  | 0.939 | 0.848 | 0.109 |
| 543 | S1       | 50k    | ordered | 0.561 | 0.978 | 0.913 | 65 | 0.955 | 0.927 | 0.209 |
| 544 | S1       | 100k   | ordered | 0.562 | 0.946 | 0.840 | 19 | 0.970 | 0.955 | 0.194 |
| 545 | S1       | 200k   | ordered | 0.598 | 0.806 | 0.574 | 6  | 0.973 | 0.955 | 0.295 |
| 546 | S1       | 50k    | ordered | 0.444 | 0.991 | 0.956 | 59 | 0.946 | 0.877 | 0.144 |
| 547 | S1       | 100k   | ordered | 0.476 | 0.969 | 0.859 | 18 | 0.956 | 0.923 | 0.143 |
| 548 | S1       | 200k   | ordered | 0.420 | 0.893 | 0.622 | 3  | 0.952 | 0.925 | 0.082 |
| 549 | S1       | 50k    | ordered | 0.369 | 0.991 | 0.967 | 66 | 0.940 | 0.887 | 0.127 |
| 550 | S1       | 100k   | ordered | 0.336 | 0.965 | 0.864 | 12 | 0.965 | 0.944 | 0.071 |
| 551 | S1       | 200k   | ordered | 0.260 | 0.921 | 0.739 | 3  | 0.887 | 0.658 | 0.047 |
| 552 | S1       | 50k    | ordered | 0.406 | 0.990 | 0.956 | 50 | 0.948 | 0.903 | 0.112 |
| 553 | S1       | 100k   | ordered | 0.353 | 0.981 | 0.906 | 14 | 0.933 | 0.848 | 0.088 |
| 554 | S1       | 200k   | ordered | 0.258 | 0.896 | 0.717 | 4  | 0.957 | 0.931 | 0.087 |
| 555 | S1       | 50k    | ordered | 0.458 | 0.990 | 0.958 | 65 | 0.948 | 0.896 | 0.150 |
| 556 | S1       | 100k   | ordered | 0.508 | 0.957 | 0.815 | 18 | 0.972 | 0.946 | 0.219 |
| 557 | S1       | 200k   | ordered | 0.462 | 0.814 | 0.513 | 5  | 0.962 | 0.920 | 0.268 |
| 558 | S1       | 50k    | ordered | 0.467 | 0.987 | 0.954 | 68 | 0.956 | 0.924 | 0.180 |
| 559 | S1       | 100k   | ordered | 0.332 | 0.934 | 0.810 | 14 | 0.961 | 0.935 | 0.125 |
| 560 | S1       | 200k   | ordered | 0.404 | 0.748 | 0.457 | 4  | 0.960 | 0.947 | 0.232 |
| 561 | S1       | 50k    | ordered | 0.489 | 0.991 | 0.961 | 70 | 0.938 | 0.877 | 0.161 |
| 562 | S1       | 100k   | ordered | 0.454 | 0.977 | 0.876 | 20 | 0.945 | 0.878 | 0.143 |
| 563 | S1       | 200k   | ordered | 0.454 | 0.879 | 0.645 | 6  | 0.938 | 0.910 | 0.158 |
| 564 | S1       | 50k    | ordered | 0.454 | 0.986 | 0.940 | 68 | 0.943 | 0.889 | 0.151 |
| 565 | S1       | 100k   | ordered | 0.434 | 0.970 | 0.860 | 21 | 0.948 | 0.900 | 0.125 |
| 566 | S1       | 200k   | ordered | 0.330 | 0.867 | 0.685 | 2  | 0.955 | 0.945 | 0.062 |
| 567 | S1       | 50k    | ordered | 0.481 | 0.985 | 0.907 | 71 | 0.954 | 0.887 | 0.191 |
| 568 | S1       | 100k   | ordered | 0.456 | 0.955 | 0.816 | 20 | 0.968 | 0.942 | 0.154 |
| 569 | S1       | 200k   | ordered | 0.490 | 0.732 | 0.495 | 3  | 0.971 | 0.964 | 0.113 |
| 570 | S1       | 50k    | ordered | 0.348 | 0.992 | 0.970 | 80 | 0.940 | 0.893 | 0.099 |
| 571 | S1       | 100k   | ordered | 0.378 | 0.981 | 0.890 | 22 | 0.946 | 0.909 | 0.116 |
| 572 | S1       | 200k   | ordered | 0.225 | 0.913 | 0.772 | 2  | 0.941 | 0.908 | 0.038 |
| 573 | S1       | 50k    | ordered | 0.444 | 0.976 | 0.911 | 91 | 0.956 | 0.926 | 0.173 |
| 574 | S1       | 100k   | ordered | 0.449 | 0.967 | 0.832 | 27 | 0.957 | 0.911 | 0.148 |
| 575 | S1       | 200k   | ordered | 0.529 | 0.881 | 0.659 | 7  | 0.950 | 0.895 | 0.165 |
| 576 | S1       | 50k    | ordered | 0.431 | 0.981 | 0.934 | 66 | 0.944 | 0.891 | 0.125 |

| ID  | Material | Scales | Class   | O1    | O2    | O3    | L1 | L2    | L3    | L4    |
|-----|----------|--------|---------|-------|-------|-------|----|-------|-------|-------|
| 577 | S1       | 100k   | ordered | 0.437 | 0.970 | 0.852 | 24 | 0.956 | 0.921 | 0.151 |
| 578 | S1       | 200k   | ordered | 0.407 | 0.901 | 0.675 | 3  | 0.966 | 0.955 | 0.087 |
| 579 | S1       | 50k    | ordered | 0.428 | 0.990 | 0.949 | 43 | 0.945 | 0.885 | 0.116 |
| 580 | S1       | 100k   | ordered | 0.454 | 0.968 | 0.877 | 18 | 0.951 | 0.916 | 0.118 |
| 581 | S1       | 200k   | ordered | 0.484 | 0.927 | 0.724 | 3  | 0.952 | 0.893 | 0.070 |
| 582 | S1       | 50k    | ordered | 0.382 | 0.969 | 0.917 | 85 | 0.950 | 0.890 | 0.147 |
| 583 | S1       | 100k   | ordered | 0.404 | 0.938 | 0.803 | 29 | 0.948 | 0.895 | 0.151 |
| 584 | S1       | 50k    | ordered | 0.374 | 0.981 | 0.946 | 74 | 0.948 | 0.892 | 0.129 |
| 585 | S1       | 100k   | ordered | 0.382 | 0.955 | 0.876 | 21 | 0.948 | 0.905 | 0.114 |
| 586 | S1       | 200k   | ordered | 0.361 | 0.894 | 0.716 | 9  | 0.952 | 0.928 | 0.191 |
| 587 | S1       | 50k    | ordered | 0.314 | 0.983 | 0.945 | 81 | 0.933 | 0.840 | 0.100 |
| 588 | S1       | 100k   | ordered | 0.336 | 0.973 | 0.876 | 36 | 0.933 | 0.853 | 0.128 |
| 589 | S1       | 200k   | ordered | 0.328 | 0.936 | 0.734 | 9  | 0.960 | 0.904 | 0.111 |
| 590 | S1       | 50k    | ordered | 0.453 | 0.984 | 0.910 | 58 | 0.947 | 0.894 | 0.159 |
| 591 | S1       | 100k   | ordered | 0.495 | 0.965 | 0.825 | 17 | 0.946 | 0.903 | 0.151 |
| 592 | S1       | 200k   | ordered | 0.615 | 0.788 | 0.454 | 8  | 0.951 | 0.935 | 0.340 |
| 593 | S1       | 50k    | ordered | 0.441 | 0.987 | 0.948 | 57 | 0.939 | 0.850 | 0.141 |
| 594 | S1       | 100k   | ordered | 0.464 | 0.966 | 0.856 | 21 | 0.953 | 0.899 | 0.154 |
| 595 | S1       | 200k   | ordered | 0.339 | 0.908 | 0.714 | 4  | 0.944 | 0.898 | 0.097 |
| 596 | S1       | 50k    | ordered | 0.458 | 0.990 | 0.948 | 77 | 0.950 | 0.903 | 0.176 |
| 597 | S1       | 100k   | ordered | 0.421 | 0.978 | 0.892 | 27 | 0.954 | 0.921 | 0.156 |
| 598 | S1       | 200k   | ordered | 0.474 | 0.919 | 0.745 | 4  | 0.935 | 0.853 | 0.101 |
| 599 | S1       | 50k    | ordered | 0.525 | 0.983 | 0.901 | 54 | 0.957 | 0.912 | 0.171 |
| 600 | S1       | 100k   | ordered | 0.473 | 0.933 | 0.736 | 21 | 0.963 | 0.940 | 0.211 |
| 601 | S1       | 200k   | ordered | 0.444 | 0.894 | 0.629 | 4  | 0.888 | 0.726 | 0.100 |
| 602 | S1       | 50k    | ordered | 0.497 | 0.986 | 0.934 | 70 | 0.959 | 0.922 | 0.211 |
| 603 | S1       | 100k   | ordered | 0.478 | 0.949 | 0.805 | 17 | 0.949 | 0.918 | 0.183 |
| 604 | S1       | 200k   | ordered | 0.349 | 0.823 | 0.566 | 0  | 0.000 | 0.000 | 0.000 |
| 605 | S1       | 50k    | ordered | 0.472 | 0.978 | 0.930 | 78 | 0.951 | 0.901 | 0.218 |
| 606 | S1       | 100k   | ordered | 0.467 | 0.942 | 0.830 | 25 | 0.959 | 0.933 | 0.212 |
| 607 | S1       | 200k   | ordered | 0.583 | 0.826 | 0.547 | 10 | 0.961 | 0.939 | 0.363 |
| 608 | S1       | 50k    | ordered | 0.575 | 0.975 | 0.874 | 63 | 0.961 | 0.925 | 0.256 |
| 609 | S1       | 100k   | ordered | 0.557 | 0.969 | 0.833 | 26 | 0.957 | 0.864 | 0.280 |
| 610 | S1       | 200k   | ordered | 0.551 | 0.841 | 0.609 | 8  | 0.965 | 0.928 | 0.327 |
| 611 | S1       | 50k    | ordered | 0.306 | 0.996 | 0.982 | 72 | 0.932 | 0.874 | 0.071 |
| 612 | S1       | 100k   | ordered | 0.335 | 0.981 | 0.919 | 21 | 0.921 | 0.884 | 0.081 |
| 613 | S1       | 200k   | ordered | 0.409 | 0.924 | 0.709 | 4  | 0.923 | 0.856 | 0.089 |
| 614 | S1       | 50k    | ordered | 0.464 | 0.981 | 0.927 | 70 | 0.957 | 0.924 | 0.189 |
| 615 | S1       | 100k   | ordered | 0.461 | 0.953 | 0.851 | 19 | 0.962 | 0.920 | 0.164 |
| 616 | S1       | 200k   | ordered | 0.466 | 0.882 | 0.630 | 5  | 0.965 | 0.926 | 0.138 |
| 617 | S1       | 50k    | ordered | 0.407 | 0.968 | 0.899 | 59 | 0.956 | 0.923 | 0.146 |
| 618 | S1       | 100k   | ordered | 0.453 | 0.934 | 0.812 | 26 | 0.960 | 0.934 | 0.184 |
| 619 | S1       | 200k   | ordered | 0.492 | 0.845 | 0.591 | 8  | 0.959 | 0.911 | 0.224 |
| 620 | S1       | 50k    | ordered | 0.405 | 0.990 | 0.951 | 59 | 0.959 | 0.924 | 0.135 |
| 621 | S1       | 100k   | ordered | 0.400 | 0.973 | 0.868 | 22 | 0.939 | 0.890 | 0.146 |
| 622 | S1       | 50k    | ordered | 0.323 | 0.979 | 0.909 | 99 | 0.954 | 0.914 | 0.115 |
| 623 | S1       | 100k   | ordered | 0.325 | 0.947 | 0.795 | 31 | 0.949 | 0.920 | 0.126 |
| 624 | S1       | 200k   | ordered | 0.298 | 0.950 | 0.798 | 4  | 0.939 | 0.912 | 0.055 |
| 625 | S1       | 50k    | ordered | 0.365 | 0.990 | 0.955 | 81 | 0.948 | 0.882 | 0.141 |
| 626 | S1       | 100k   | ordered | 0.354 | 0.982 | 0.924 | 27 | 0.959 | 0.927 | 0.141 |
| 627 | S1       | 200k   | ordered | 0.468 | 0.912 | 0.669 | 6  | 0.924 | 0.869 | 0.134 |



| ID  | Material | Scales | Class   | O1    | O2    | O3    | L1  | L2    | L3    | L4    |
|-----|----------|--------|---------|-------|-------|-------|-----|-------|-------|-------|
| 628 | S1       | 50k    | ordered | 0.399 | 0.969 | 0.902 | 142 | 0.950 | 0.890 | 0.184 |
| 629 | S1       | 100k   | ordered | 0.362 | 0.946 | 0.849 | 41  | 0.956 | 0.920 | 0.185 |
| 630 | S1       | 50k    | ordered | 0.323 | 0.974 | 0.925 | 104 | 0.938 | 0.861 | 0.133 |
| 631 | S1       | 100k   | ordered | 0.359 | 0.946 | 0.814 | 34  | 0.958 | 0.925 | 0.155 |
| 632 | S1       | 50k    | ordered | 0.463 | 0.990 | 0.943 | 66  | 0.946 | 0.887 | 0.173 |
| 633 | S1       | 100k   | ordered | 0.552 | 0.949 | 0.793 | 19  | 0.957 | 0.910 | 0.232 |
| 634 | S1       | 200k   | ordered | 0.489 | 0.882 | 0.630 | 4   | 0.950 | 0.884 | 0.167 |
| 635 | S1       | 50k    | ordered | 0.444 | 0.989 | 0.957 | 82  | 0.945 | 0.885 | 0.156 |
| 636 | S1       | 100k   | ordered | 0.439 | 0.966 | 0.874 | 17  | 0.954 | 0.922 | 0.101 |
| 637 | S1       | 200k   | ordered | 0.426 | 0.891 | 0.695 | 8   | 0.963 | 0.947 | 0.152 |
| 638 | S1       | 50k    | ordered | 0.420 | 0.991 | 0.964 | 76  | 0.947 | 0.892 | 0.120 |
| 639 | S1       | 100k   | ordered | 0.410 | 0.979 | 0.909 | 23  | 0.943 | 0.851 | 0.117 |
| 640 | S1       | 200k   | ordered | 0.479 | 0.889 | 0.681 | 7   | 0.960 | 0.927 | 0.171 |
| 641 | S1       | 50k    | ordered | 0.413 | 0.988 | 0.961 | 79  | 0.940 | 0.885 | 0.119 |
| 642 | S1       | 100k   | ordered | 0.410 | 0.971 | 0.878 | 20  | 0.942 | 0.880 | 0.112 |
| 643 | S1       | 200k   | ordered | 0.456 | 0.891 | 0.705 | 6   | 0.958 | 0.901 | 0.133 |
| 644 | S1       | 50k    | ordered | 0.431 | 0.990 | 0.956 | 67  | 0.946 | 0.902 | 0.138 |
| 645 | S1       | 100k   | ordered | 0.467 | 0.972 | 0.864 | 25  | 0.951 | 0.877 | 0.196 |
| 646 | S1       | 100k   | ordered | 0.454 | 0.972 | 0.879 | 22  | 0.952 | 0.914 | 0.184 |
| 647 | S1       | 200k   | ordered | 0.506 | 0.911 | 0.654 | 5   | 0.965 | 0.943 | 0.152 |
| 648 | S1       | 50k    | ordered | 0.371 | 0.989 | 0.962 | 92  | 0.938 | 0.876 | 0.118 |
| 649 | S1       | 100k   | ordered | 0.428 | 0.977 | 0.908 | 21  | 0.954 | 0.924 | 0.112 |
| 650 | S1       | 200k   | ordered | 0.485 | 0.886 | 0.669 | 5   | 0.958 | 0.922 | 0.131 |
| 651 | S1       | 50k    | ordered | 0.290 | 0.996 | 0.984 | 81  | 0.914 | 0.820 | 0.076 |
| 652 | S1       | 100k   | ordered | 0.272 | 0.986 | 0.930 | 19  | 0.949 | 0.876 | 0.067 |
| 653 | S1       | 200k   | ordered | 0.325 | 0.947 | 0.778 | 2   | 0.951 | 0.880 | 0.028 |
| 654 | S1       | 50k    | ordered | 0.383 | 0.985 | 0.939 | 84  | 0.949 | 0.897 | 0.130 |
| 655 | S1       | 100k   | ordered | 0.366 | 0.962 | 0.867 | 27  | 0.958 | 0.927 | 0.123 |
| 656 | S1       | 200k   | ordered | 0.320 | 0.923 | 0.748 | 6   | 0.942 | 0.872 | 0.080 |
| 657 | S1       | 50k    | ordered | 0.422 | 0.993 | 0.971 | 94  | 0.948 | 0.897 | 0.156 |
| 658 | S1       | 100k   | ordered | 0.349 | 0.978 | 0.902 | 17  | 0.942 | 0.897 | 0.097 |
| 659 | S1       | 200k   | ordered | 0.309 | 0.904 | 0.710 | 5   | 0.966 | 0.932 | 0.118 |
| 660 | S1       | 50k    | ordered | 0.388 | 0.987 | 0.952 | 82  | 0.945 | 0.888 | 0.145 |
| 661 | S1       | 100k   | ordered | 0.369 | 0.975 | 0.877 | 15  | 0.950 | 0.905 | 0.089 |
| 662 | S1       | 200k   | ordered | 0.394 | 0.890 | 0.675 | 5   | 0.947 | 0.923 | 0.112 |
| 663 | S1       | 50k    | ordered | 0.461 | 0.994 | 0.977 | 71  | 0.938 | 0.889 | 0.128 |
| 664 | S1       | 100k   | ordered | 0.438 | 0.970 | 0.864 | 13  | 0.963 | 0.922 | 0.096 |
| 665 | S1       | 200k   | ordered | 0.457 | 0.868 | 0.669 | 2   | 0.988 | 0.975 | 0.056 |
| 666 | S1       | 50k    | ordered | 0.437 | 0.993 | 0.967 | 62  | 0.944 | 0.867 | 0.134 |
| 667 | S1       | 100k   | ordered | 0.482 | 0.965 | 0.859 | 23  | 0.971 | 0.943 | 0.175 |
| 668 | S1       | 200k   | ordered | 0.473 | 0.835 | 0.589 | 5   | 0.979 | 0.954 | 0.224 |
| 669 | S1       | 50k    | ordered | 0.392 | 0.944 | 0.839 | 162 | 0.940 | 0.872 | 0.196 |
| 670 | S1       | 100k   | ordered | 0.352 | 0.929 | 0.800 | 39  | 0.946 | 0.882 | 0.160 |
| 671 | S1       | 200k   | ordered | 0.419 | 0.866 | 0.600 | 13  | 0.943 | 0.844 | 0.256 |
| 672 | S1       | 50k    | ordered | 0.341 | 0.965 | 0.907 | 146 | 0.941 | 0.878 | 0.159 |
| 673 | S1       | 100k   | ordered | 0.357 | 0.958 | 0.855 | 38  | 0.932 | 0.832 | 0.158 |
| 674 | S1       | 50k    | ordered | 0.486 | 0.943 | 0.838 | 86  | 0.949 | 0.907 | 0.230 |
| 675 | S1       | 100k   | ordered | 0.503 | 0.904 | 0.738 | 23  | 0.969 | 0.956 | 0.231 |
| 676 | S1       | 200k   | ordered | 0.589 | 0.855 | 0.610 | 8   | 0.957 | 0.939 | 0.270 |
| 677 | S1       | 50k    | ordered | 0.471 | 0.992 | 0.960 | 80  | 0.936 | 0.871 | 0.162 |
| 678 | S1       | 100k   | ordered | 0.446 | 0.967 | 0.865 | 19  | 0.943 | 0.867 | 0.121 |

| ID  | Material | Scales | Class   | O1    | O2    | O3    | L1  | L2    | L3    | L4    |
|-----|----------|--------|---------|-------|-------|-------|-----|-------|-------|-------|
| 679 | S1       | 50k    | ordered | 0.429 | 0.993 | 0.963 | 70  | 0.948 | 0.900 | 0.140 |
| 680 | S1       | 100k   | ordered | 0.461 | 0.962 | 0.842 | 26  | 0.955 | 0.912 | 0.170 |
| 681 | S1       | 200k   | ordered | 0.452 | 0.898 | 0.625 | 7   | 0.952 | 0.917 | 0.160 |
| 682 | S1       | 50k    | ordered | 0.399 | 0.994 | 0.970 | 66  | 0.939 | 0.880 | 0.105 |
| 683 | S1       | 50k    | ordered | 0.429 | 0.982 | 0.941 | 69  | 0.946 | 0.890 | 0.150 |
| 684 | S1       | 100k   | ordered | 0.360 | 0.972 | 0.891 | 19  | 0.943 | 0.888 | 0.118 |
| 685 | S1       | 200k   | ordered | 0.494 | 0.885 | 0.663 | 3   | 0.960 | 0.942 | 0.088 |
| 686 | S1       | 50k    | ordered | 0.418 | 0.989 | 0.946 | 66  | 0.946 | 0.893 | 0.124 |
| 687 | S1       | 100k   | ordered | 0.489 | 0.965 | 0.812 | 21  | 0.957 | 0.933 | 0.164 |
| 688 | S1       | 200k   | ordered | 0.505 | 0.888 | 0.631 | 5   | 0.969 | 0.959 | 0.114 |
| 689 | S1       | 50k    | ordered | 0.396 | 0.993 | 0.961 | 73  | 0.935 | 0.871 | 0.118 |
| 690 | S1       | 100k   | ordered | 0.429 | 0.978 | 0.903 | 20  | 0.941 | 0.861 | 0.109 |
| 691 | S1       | 200k   | ordered | 0.443 | 0.881 | 0.702 | 3   | 0.941 | 0.919 | 0.057 |
| 692 | S1       | 100k   | ordered | 0.484 | 0.976 | 0.893 | 27  | 0.946 | 0.890 | 0.172 |
| 693 | S1       | 200k   | ordered | 0.560 | 0.912 | 0.730 | 8   | 0.950 | 0.936 | 0.156 |
| 694 | S1       | 50k    | ordered | 0.378 | 0.995 | 0.977 | 75  | 0.930 | 0.832 | 0.108 |
| 695 | S1       | 100k   | ordered | 0.365 | 0.977 | 0.890 | 15  | 0.953 | 0.910 | 0.082 |
| 696 | S1       | 50k    | ordered | 0.397 | 0.973 | 0.906 | 83  | 0.938 | 0.846 | 0.171 |
| 697 | S1       | 100k   | ordered | 0.384 | 0.949 | 0.839 | 19  | 0.940 | 0.846 | 0.131 |
| 698 | S1       | 50k    | ordered | 0.411 | 0.983 | 0.941 | 68  | 0.944 | 0.893 | 0.144 |
| 699 | S1       | 100k   | ordered | 0.382 | 0.963 | 0.833 | 24  | 0.939 | 0.862 | 0.140 |
| 700 | S1       | 200k   | ordered | 0.325 | 0.906 | 0.721 | 3   | 0.941 | 0.916 | 0.053 |
| 701 | S1       | 100k   | ordered | 0.352 | 0.936 | 0.788 | 19  | 0.949 | 0.897 | 0.121 |
| 702 | S1       | 200k   | ordered | 0.460 | 0.853 | 0.633 | 8   | 0.904 | 0.762 | 0.180 |
| 703 | S1       | 50k    | ordered | 0.432 | 0.926 | 0.772 | 105 | 0.951 | 0.896 | 0.236 |
| 704 | S1       | 100k   | ordered | 0.449 | 0.887 | 0.699 | 37  | 0.941 | 0.862 | 0.272 |
| 705 | S1       | 200k   | ordered | 0.462 | 0.801 | 0.591 | 9   | 0.955 | 0.922 | 0.205 |
| 706 | S1       | 50k    | ordered | 0.529 | 0.968 | 0.897 | 82  | 0.960 | 0.920 | 0.241 |
| 707 | S1       | 100k   | ordered | 0.484 | 0.951 | 0.840 | 24  | 0.957 | 0.933 | 0.190 |
| 708 | S1       | 200k   | ordered | 0.476 | 0.862 | 0.595 | 4   | 0.975 | 0.947 | 0.206 |
| 709 | S1       | 50k    | ordered | 0.391 | 0.989 | 0.960 | 72  | 0.933 | 0.856 | 0.123 |
| 710 | S1       | 100k   | ordered | 0.416 | 0.977 | 0.903 | 24  | 0.943 | 0.864 | 0.134 |
| 711 | S1       | 200k   | ordered | 0.415 | 0.919 | 0.642 | 4   | 0.944 | 0.918 | 0.108 |
| 712 | S1       | 50k    | ordered | 0.370 | 0.985 | 0.941 | 74  | 0.939 | 0.878 | 0.120 |
| 713 | S1       | 100k   | ordered | 0.396 | 0.975 | 0.894 | 30  | 0.947 | 0.902 | 0.122 |
| 714 | S1       | 200k   | ordered | 0.359 | 0.939 | 0.769 | 4   | 0.972 | 0.953 | 0.067 |
| 715 | S1       | 50k    | ordered | 0.430 | 0.975 | 0.921 | 54  | 0.936 | 0.870 | 0.136 |
| 716 | S1       | 100k   | ordered | 0.426 | 0.962 | 0.852 | 18  | 0.959 | 0.899 | 0.132 |
| 717 | S1       | 200k   | ordered | 0.398 | 0.883 | 0.625 | 9   | 0.949 | 0.863 | 0.202 |
| 718 | S1       | 50k    | ordered | 0.484 | 0.987 | 0.936 | 77  | 0.958 | 0.924 | 0.190 |
| 719 | S1       | 100k   | ordered | 0.596 | 0.943 | 0.787 | 26  | 0.954 | 0.915 | 0.255 |
| 720 | S1       | 200k   | ordered | 0.458 | 0.888 | 0.626 | 5   | 0.938 | 0.911 | 0.187 |
| 721 | S1       | 50k    | ordered | 0.372 | 0.982 | 0.937 | 79  | 0.940 | 0.864 | 0.125 |
| 722 | S1       | 100k   | ordered | 0.329 | 0.964 | 0.856 | 16  | 0.946 | 0.787 | 0.092 |
| 723 | S1       | 200k   | ordered | 0.291 | 0.868 | 0.685 | 6   | 0.972 | 0.954 | 0.140 |
| 724 | S1       | 50k    | ordered | 0.331 | 0.995 | 0.981 | 64  | 0.934 | 0.863 | 0.075 |
| 725 | S1       | 100k   | ordered | 0.312 | 0.988 | 0.933 | 18  | 0.944 | 0.867 | 0.070 |
| 726 | S1       | 200k   | ordered | 0.313 | 0.938 | 0.766 | 9   | 0.950 | 0.904 | 0.151 |
| 727 | S1       | 50k    | ordered | 0.380 | 0.987 | 0.964 | 85  | 0.942 | 0.879 | 0.109 |
| 728 | S1       | 100k   | ordered | 0.378 | 0.971 | 0.887 | 19  | 0.946 | 0.885 | 0.107 |
| 729 | S1       | 200k   | ordered | 0.318 | 0.919 | 0.768 | 5   | 0.951 | 0.850 | 0.084 |

| ID  | Material | Scales | Class   | O1    | O2    | O3    | L1  | L2    | L3    | L4    |
|-----|----------|--------|---------|-------|-------|-------|-----|-------|-------|-------|
| 730 | S1       | 50k    | ordered | 0.393 | 0.990 | 0.963 | 94  | 0.939 | 0.879 | 0.130 |
| 731 | S1       | 100k   | ordered | 0.370 | 0.976 | 0.902 | 19  | 0.949 | 0.908 | 0.103 |
| 732 | S1       | 200k   | ordered | 0.246 | 0.917 | 0.742 | 4   | 0.963 | 0.953 | 0.071 |
| 733 | S1       | 50k    | ordered | 0.381 | 0.973 | 0.902 | 89  | 0.945 | 0.897 | 0.155 |
| 734 | S1       | 100k   | ordered | 0.426 | 0.936 | 0.794 | 38  | 0.943 | 0.898 | 0.177 |
| 735 | S1       | 200k   | ordered | 0.298 | 0.906 | 0.733 | 4   | 0.963 | 0.943 | 0.062 |
| 736 | S1       | 50k    | ordered | 0.300 | 0.975 | 0.918 | 142 | 0.946 | 0.892 | 0.122 |
| 737 | S1       | 100k   | ordered | 0.252 | 0.966 | 0.899 | 31  | 0.934 | 0.837 | 0.093 |
| 738 | S1       | 200k   | ordered | 0.270 | 0.911 | 0.762 | 9   | 0.926 | 0.862 | 0.111 |
| 739 | S1       | 50k    | ordered | 0.443 | 0.983 | 0.931 | 81  | 0.949 | 0.904 | 0.154 |
| 740 | S1       | 100k   | ordered | 0.462 | 0.925 | 0.709 | 16  | 0.952 | 0.904 | 0.155 |
| 741 | S1       | 200k   | ordered | 0.634 | 0.753 | 0.528 | 5   | 0.977 | 0.961 | 0.244 |
| 742 | S1       | 50k    | ordered | 0.375 | 0.995 | 0.972 | 95  | 0.945 | 0.876 | 0.127 |
| 743 | S1       | 100k   | ordered | 0.438 | 0.978 | 0.890 | 24  | 0.946 | 0.853 | 0.165 |
| 744 | S1       | 200k   | ordered | 0.440 | 0.920 | 0.678 | 5   | 0.969 | 0.961 | 0.104 |
| 745 | S1       | 50k    | ordered | 0.382 | 0.992 | 0.974 | 77  | 0.939 | 0.890 | 0.113 |
| 746 | S1       | 100k   | ordered | 0.413 | 0.978 | 0.879 | 22  | 0.944 | 0.901 | 0.135 |
| 747 | S1       | 200k   | ordered | 0.494 | 0.862 | 0.647 | 4   | 0.955 | 0.924 | 0.130 |
| 748 | S1       | 50k    | ordered | 0.388 | 0.987 | 0.952 | 77  | 0.950 | 0.906 | 0.126 |
| 749 | S1       | 100k   | ordered | 0.340 | 0.953 | 0.820 | 22  | 0.955 | 0.922 | 0.132 |
| 750 | S1       | 200k   | ordered | 0.344 | 0.876 | 0.681 | 8   | 0.960 | 0.948 | 0.169 |

### 3. SEM-images visualization in the space of interpreted order features

As a result of the application of the proposed approach, an interpretable feature description was obtained, containing seven ordering features for each SEM image of the dataset. To visualize the resulting seven-dimensional feature space, we will use dimensionality reduction methods:

#### 1) T-distributed Stochastic Neighbor Embedding (TSNE)

Figure 41 shows a representation of the SEM images after applying the TSNE method to reduce the spatial dimension to three features.

#### 2) Uniform Manifold Approximation and Projection (UMAP)

Figure 42 shows a representation of the SEM images after applying the UMAP method to reduce the spatial dimension to three features.

#### 3) FastMap

Figure 43 shows a representation of the SEM images after applying the FastMap method to reduce the spatial dimension of the three features.

#### 4) Manual feature selection

Based on the empirical observations of the authors, three features of order were selected. Figure 44 shows a graphical representation of each of the SEM images in the space of three features (O2, O3 and L4), the most informative for determining whether ordering occurred.

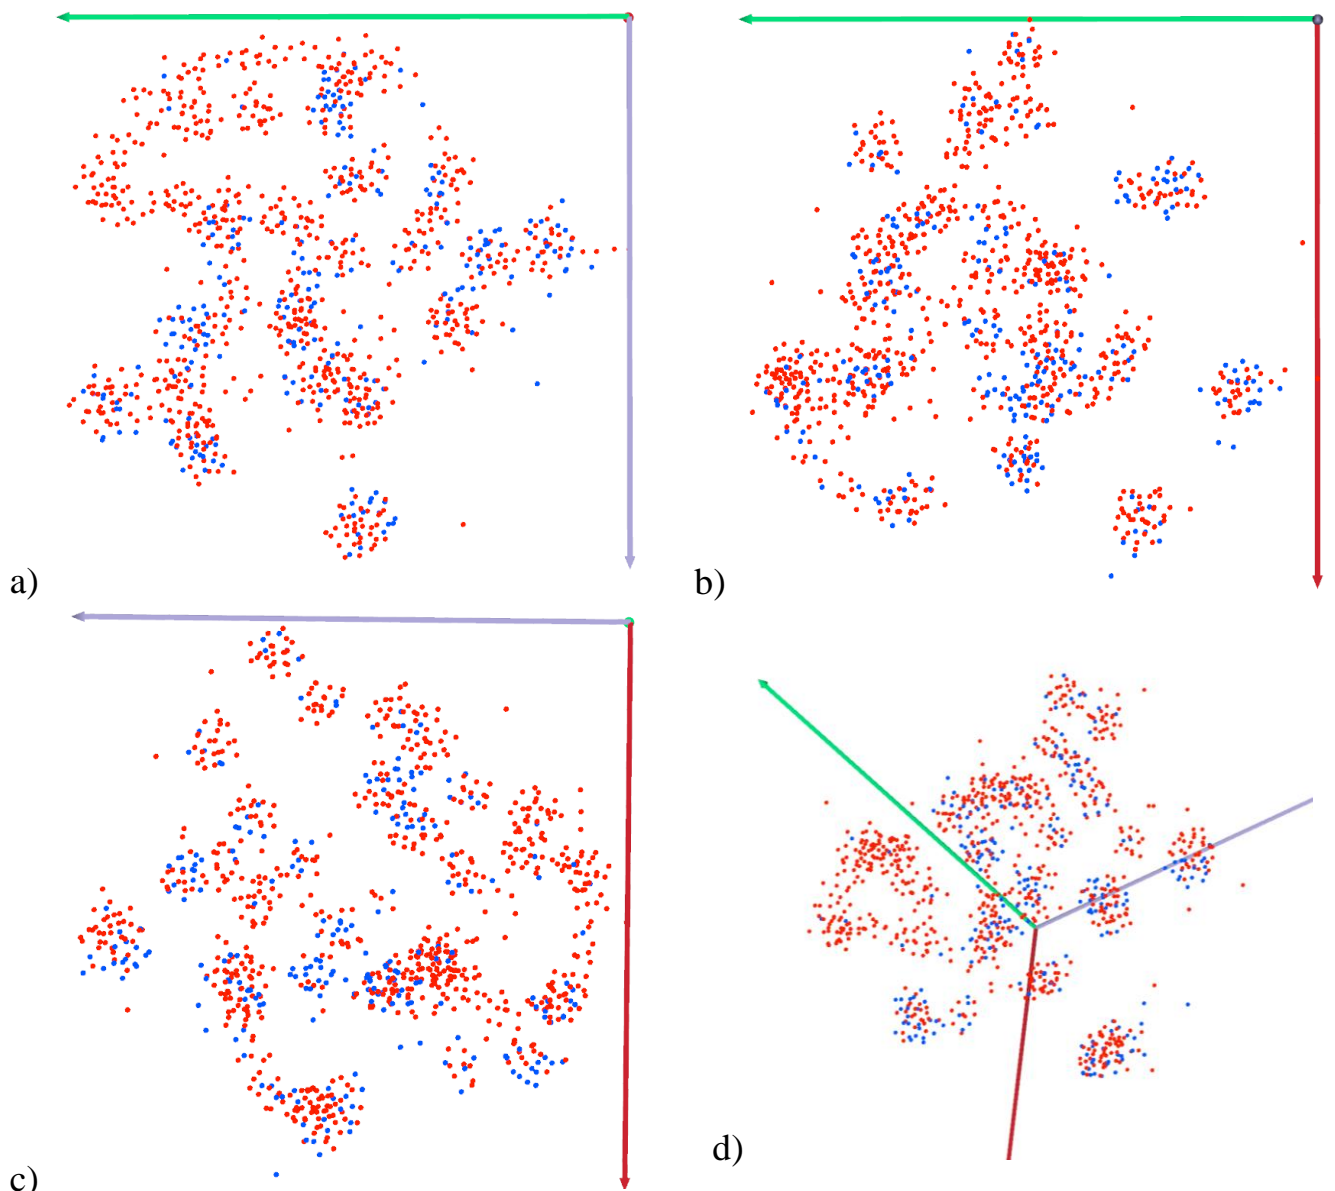

Figure 41 – Representation of SEM images after applying the TSNE method. a-c) Projections of three-dimensional space on two of the three axes; d) three-dimensional representation. The order is red, and the disorder is blue

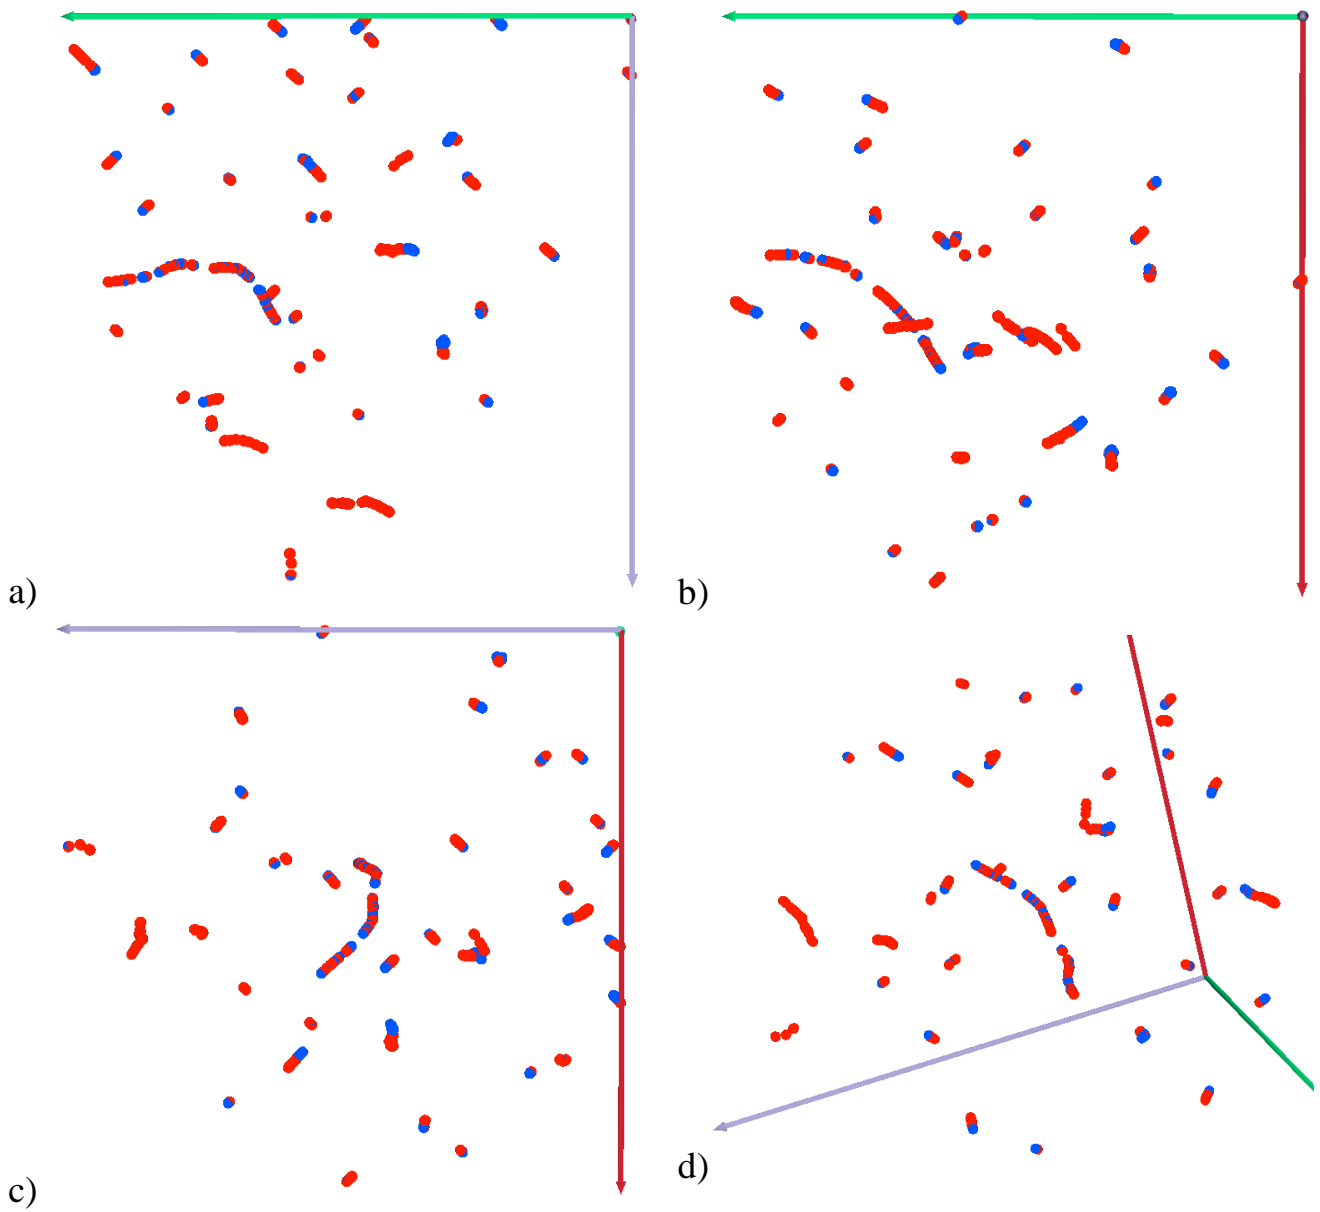

Figure 42 – Representation of SEM images after applying the UMAP method. a-c) Projections of three-dimensional space on two of the three axes; d) three-dimensional representation. The order is red, and the disorder is blue

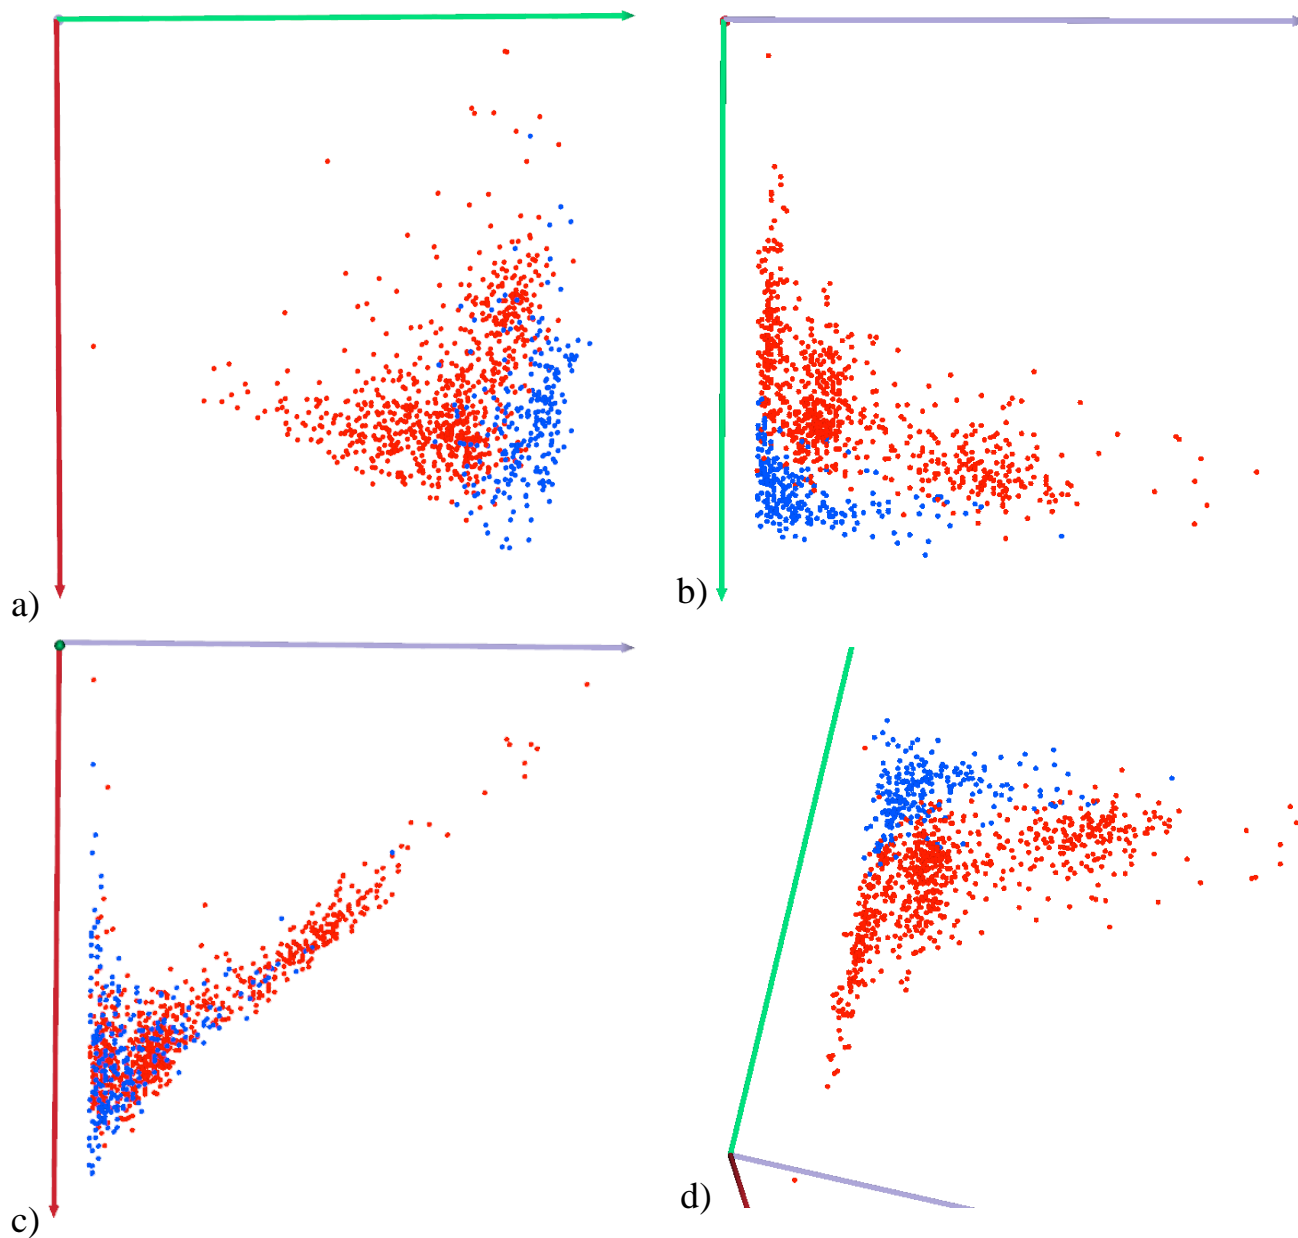

Figure 43 – Representation of SEM images after applying the FastMap method. a-c) Projections of three-dimensional space on two of the three axes; d) three-dimensional representation. The order is red, and the disorder is blue

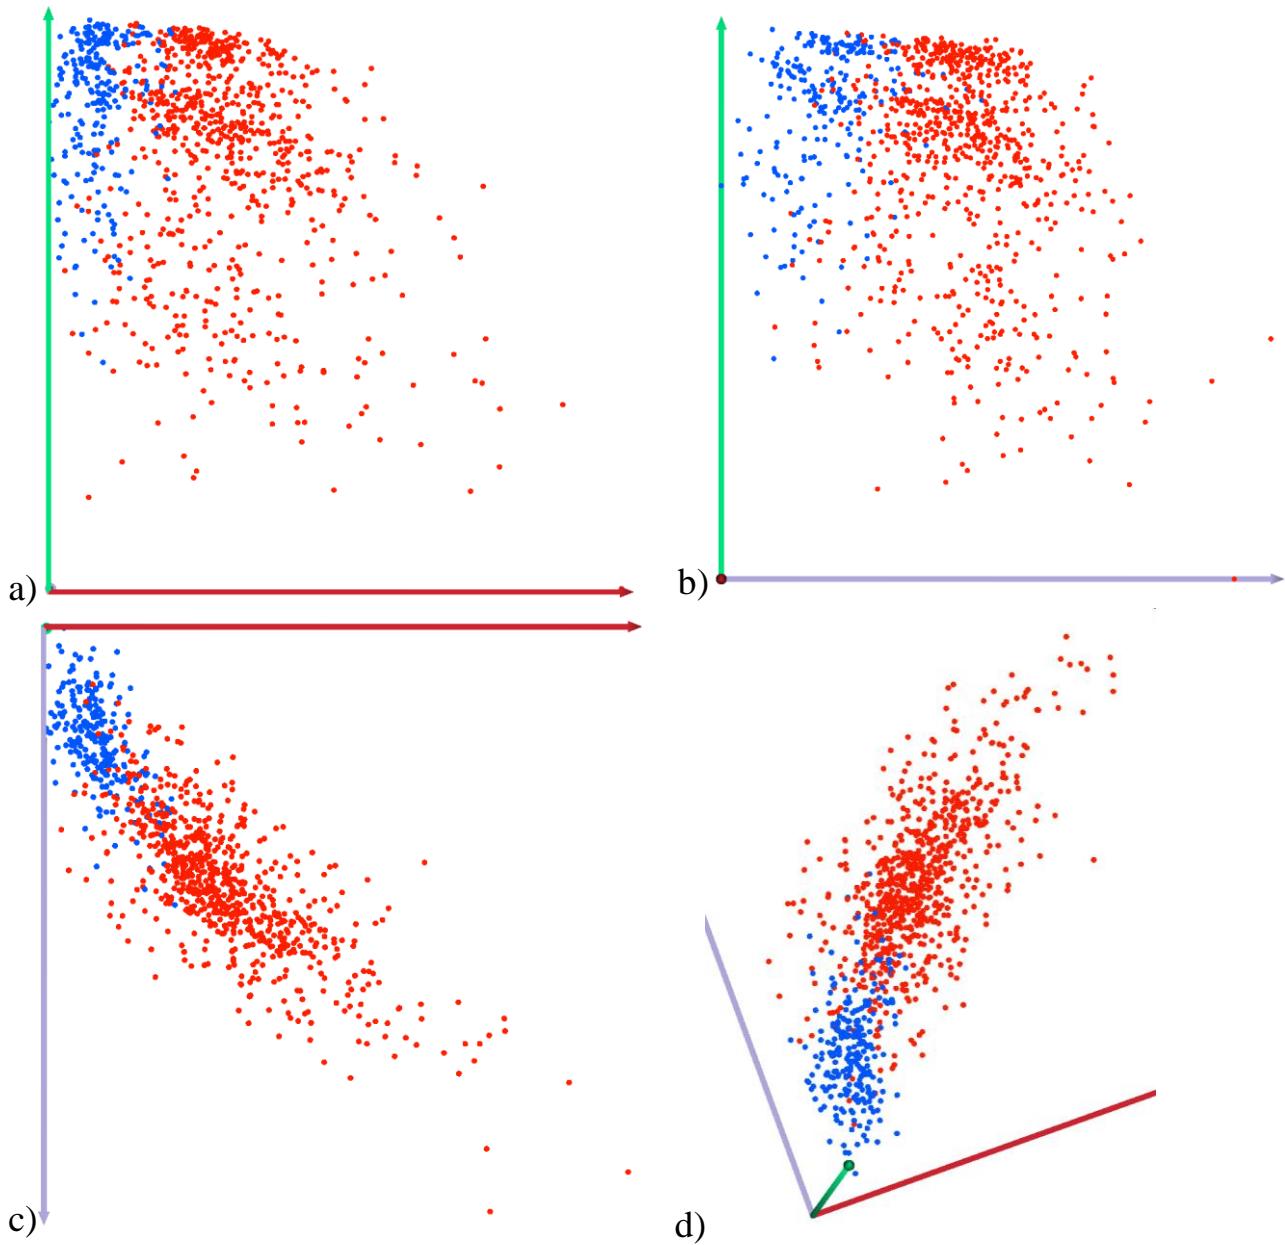

Figure 44 – Representation of SEM images in the space of the three most informative features (O2, O3, and L4). The order is red, and the disorder is blue

The variant with manual feature selection has the best representativeness among the presented visualizations; therefore, another view of Figure 44d was added to the article (section 2.2).



#### 4. Synthetic data to demonstrate the work of the proposed approach

To demonstrate the idea of the proposed approach, a small set of synthetic images was created, including four images. Each image reflects our assumptions about the ordered and disordered arrangement of nanoparticles:

1) *The ordered arrangement of particles on the grid* (Figure 45). In this case, the prevailing direction of the local groups of nanoparticles will have two position options: horizontal (the angle of inclination is  $0^\circ$ ) and vertical (the angle of inclination is  $90^\circ$  or  $-90^\circ$ ). This distribution of prevailing directions can be seen in Figure 46. This makes it possible to create long and smooth lines from nanoparticles (Figure 47). Some nanoparticles are not combined in lines because their length is less than the specified threshold value.

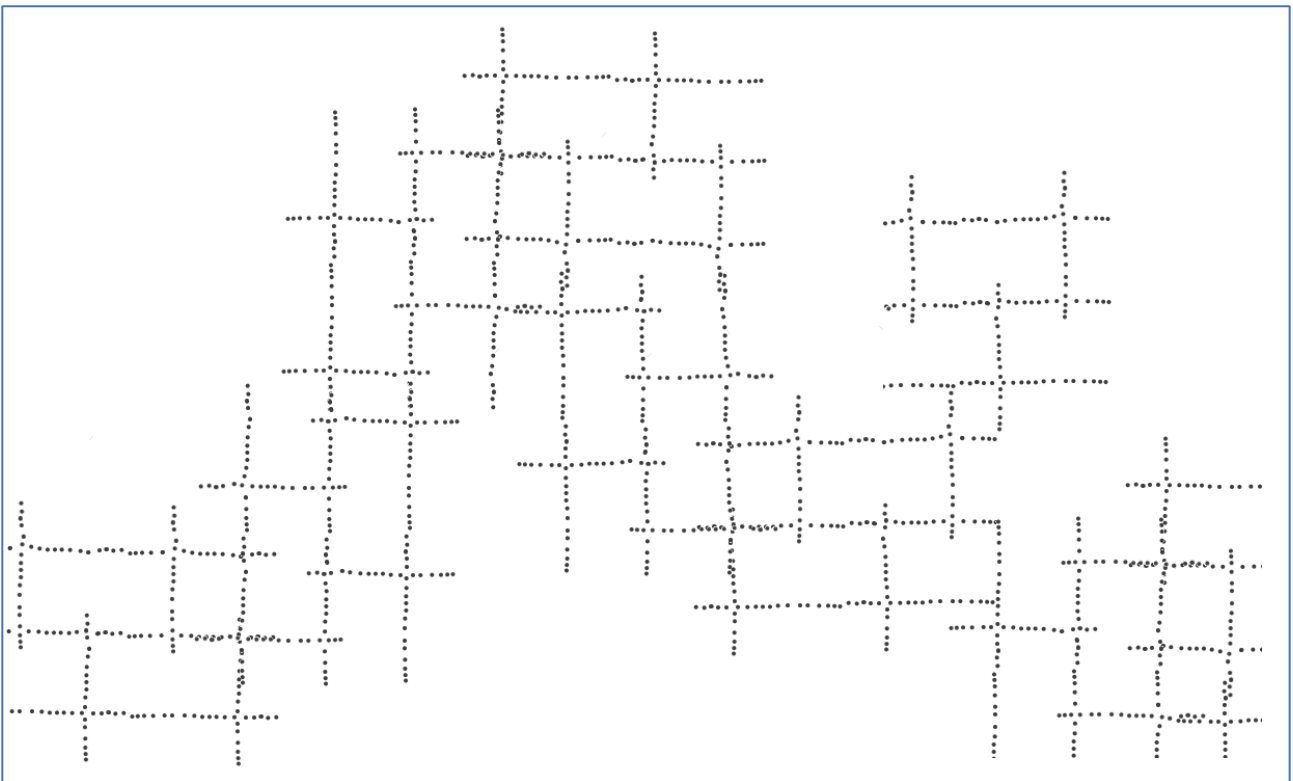

Figure 45 – The ordered arrangement of particles on the grid

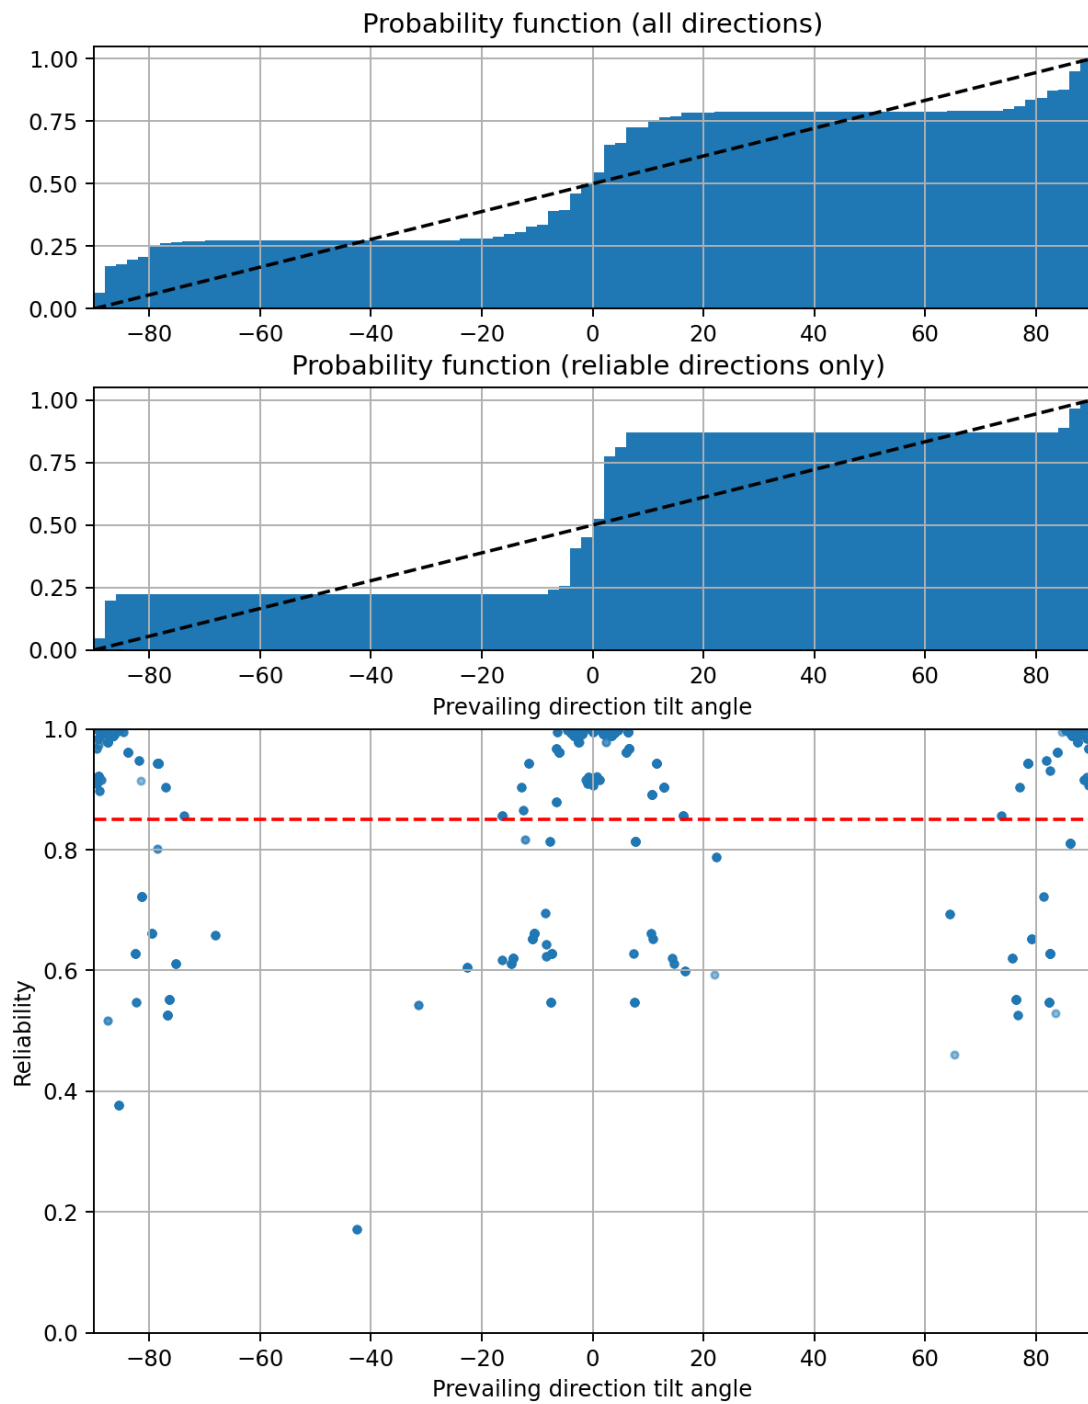

Figure 46 – Distribution of the prevailing direction of the ordered arrangement of particles on the grid

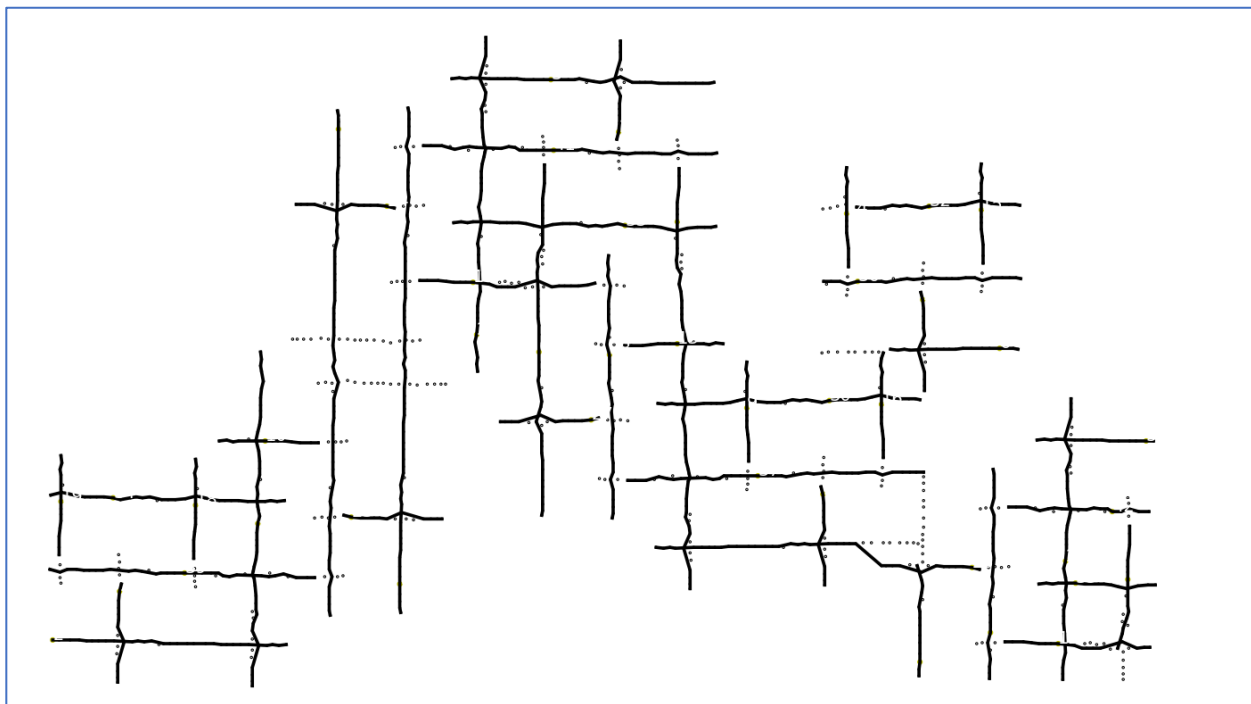

Figure 47 – The results of constructing lines on the ordered arrangement of particles on the grid

2) ***The ordered arrangement of particles on the edges of polygons*** (Figure 48). In this case, the prevailing directions of local groups of nanoparticles will have several pronounced and reliably determined variants. Then, the distribution of the prevailing directions will look like steps (Figure 49, the average chart). This allows you to create long and smooth lines from nanoparticles (Figure 50). However, in places where a large number of edges touch, the reliability of determining the prevailing direction is not high (Figure 51), so some nanoparticles do not unite in a line.

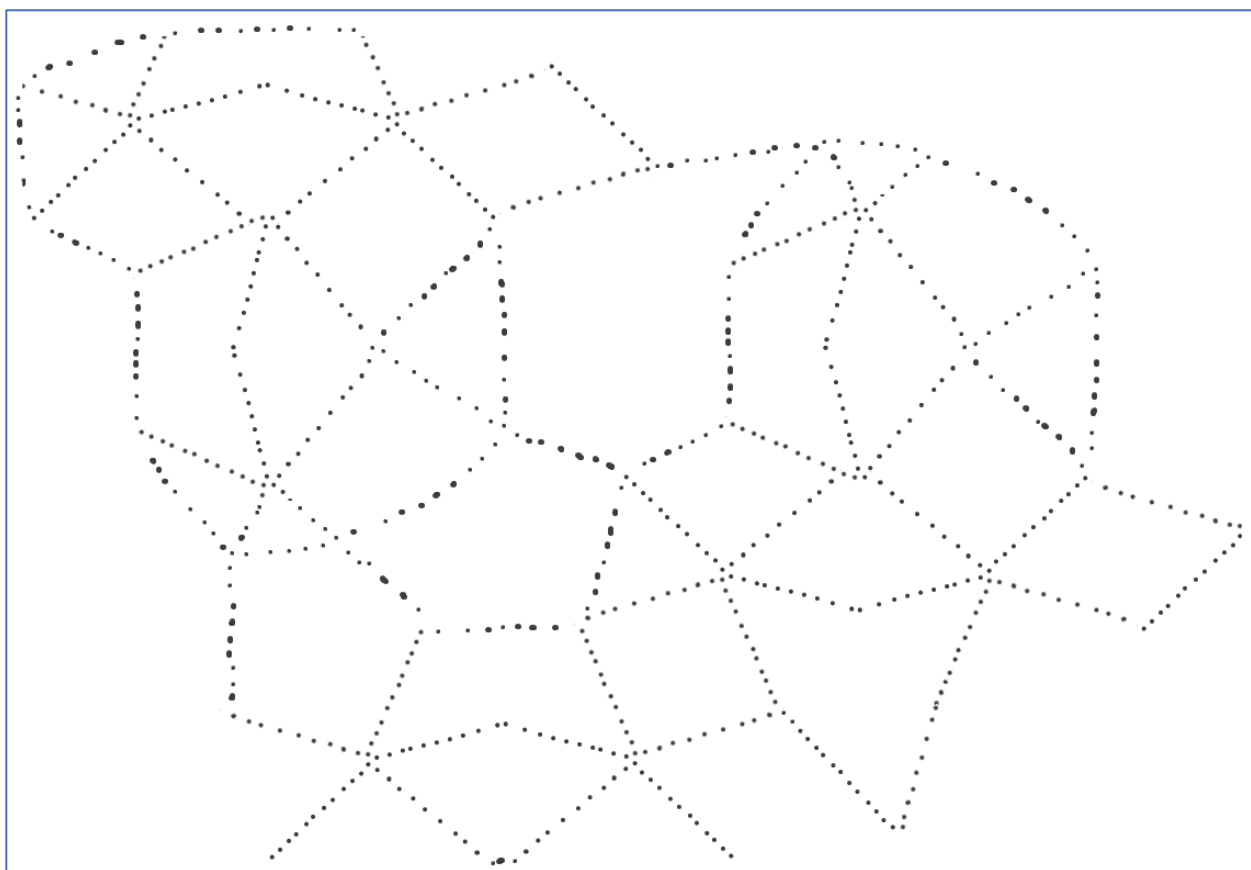

Figure 48 – The ordered arrangement of particles on the edges of polygons

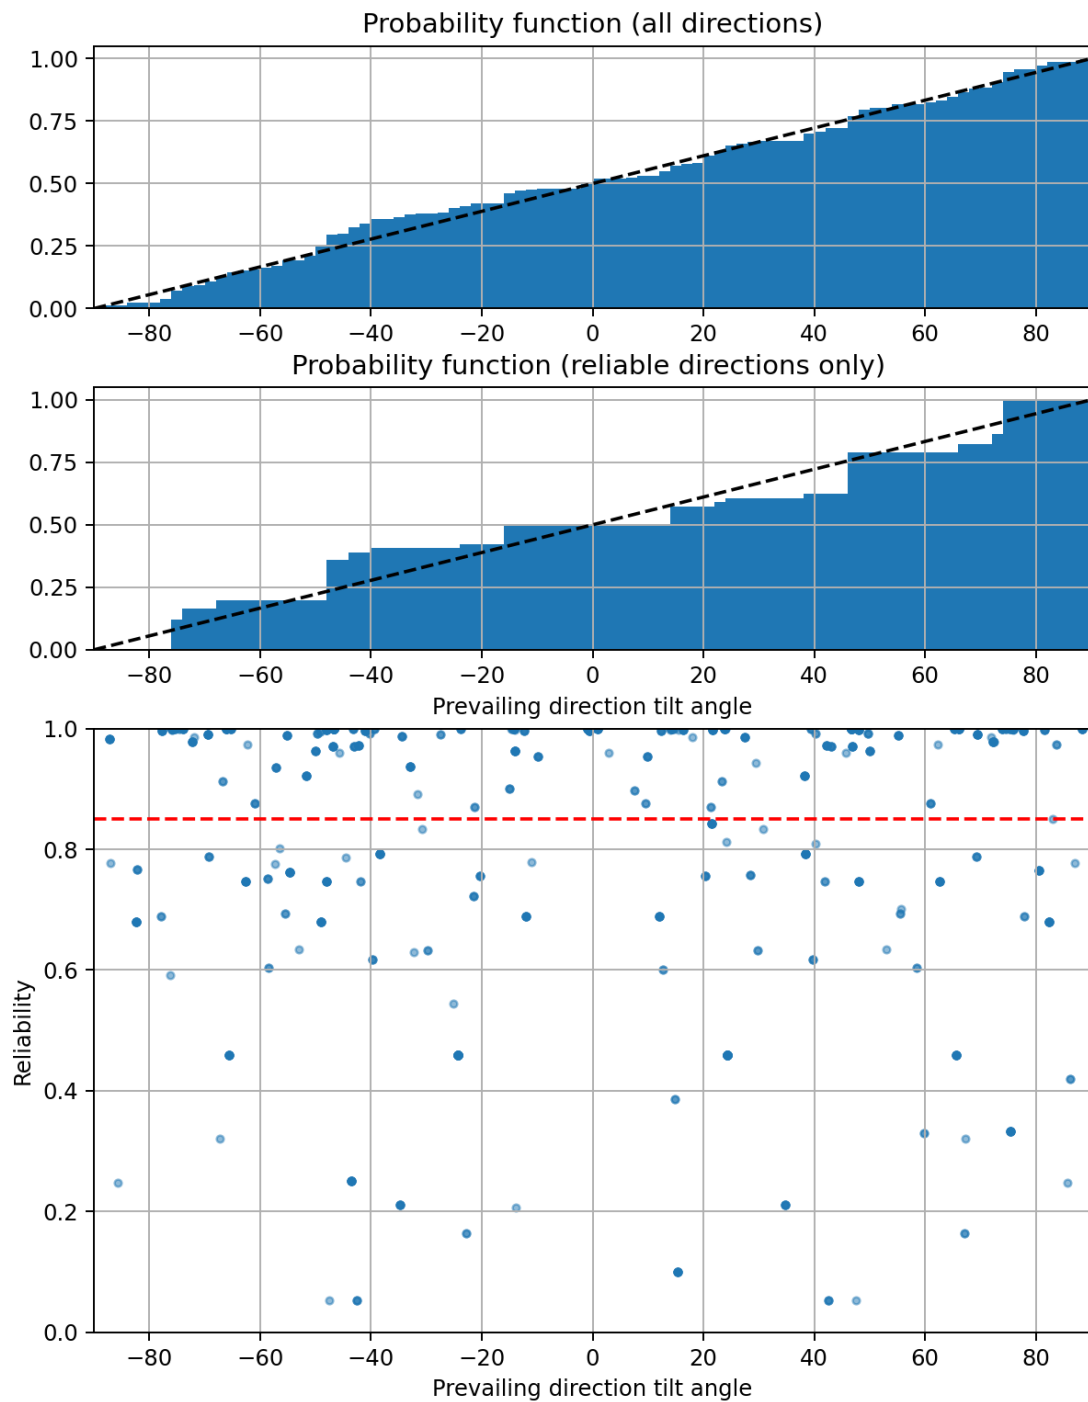

Figure 49 – Distribution of the prevailing direction of the ordered arrangement of particles on the edges of polygons

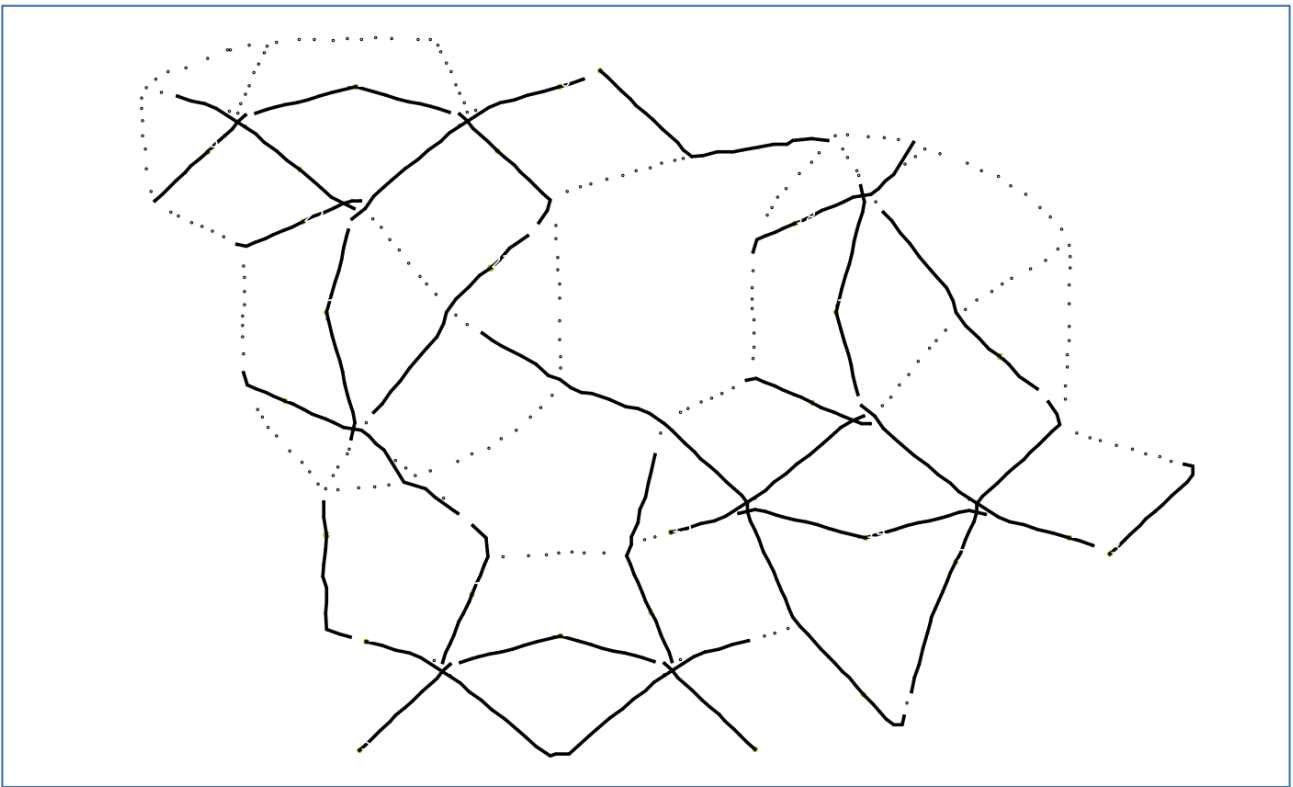

Figure 50 – The results of constructing lines on the ordered arrangement of particles on the edges of polygons

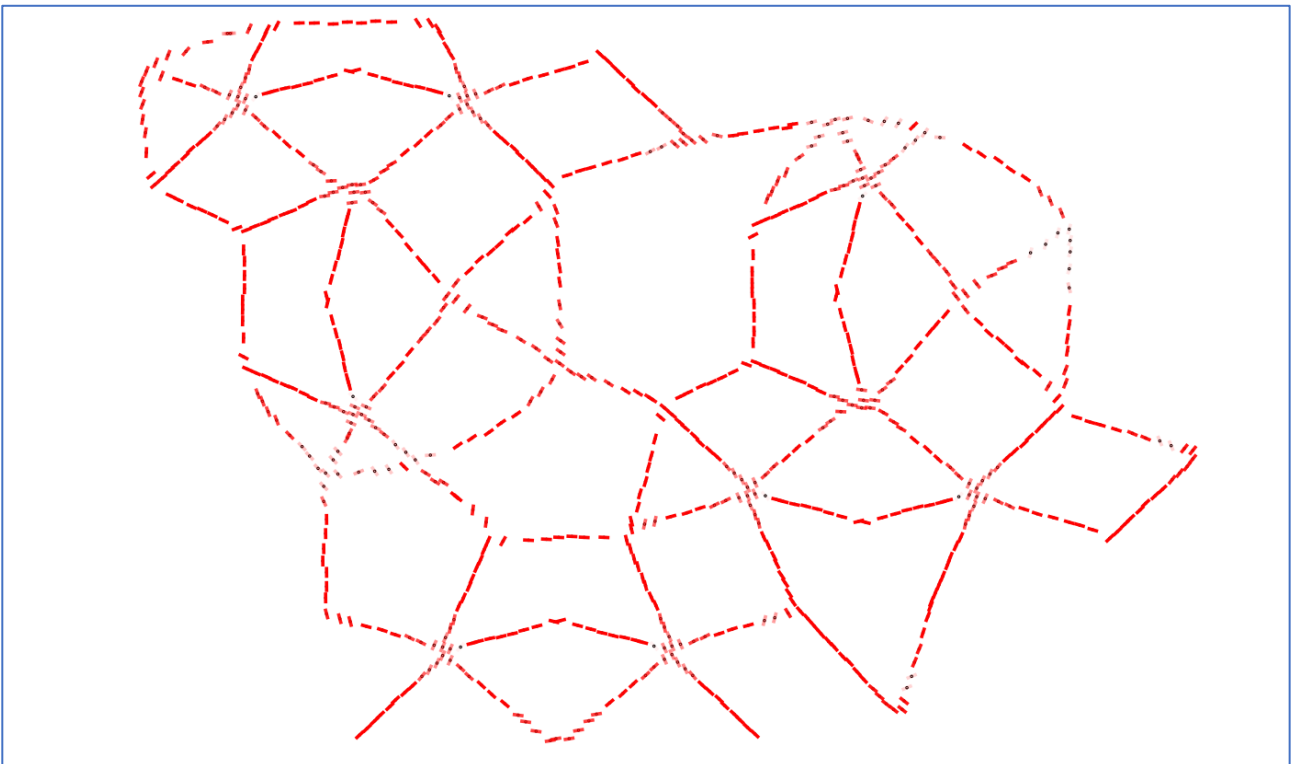

Figure 51 – The results of calculating local group orientations (in red, the brightness indicates the reliability of the definition) for the ordered arrangement of particles on the edges of polygons

3) **The disordered arrangement based on the uniform distribution of nanoparticles** (Figure 52). In this case, the prevailing directions of local groups of nanoparticles may have slightly pronounced variations, but the reliability of their determination will be very low (Figure 53, lower graph). Therefore, it is difficult to create long and smooth lines from nanoparticles (Figure 54).

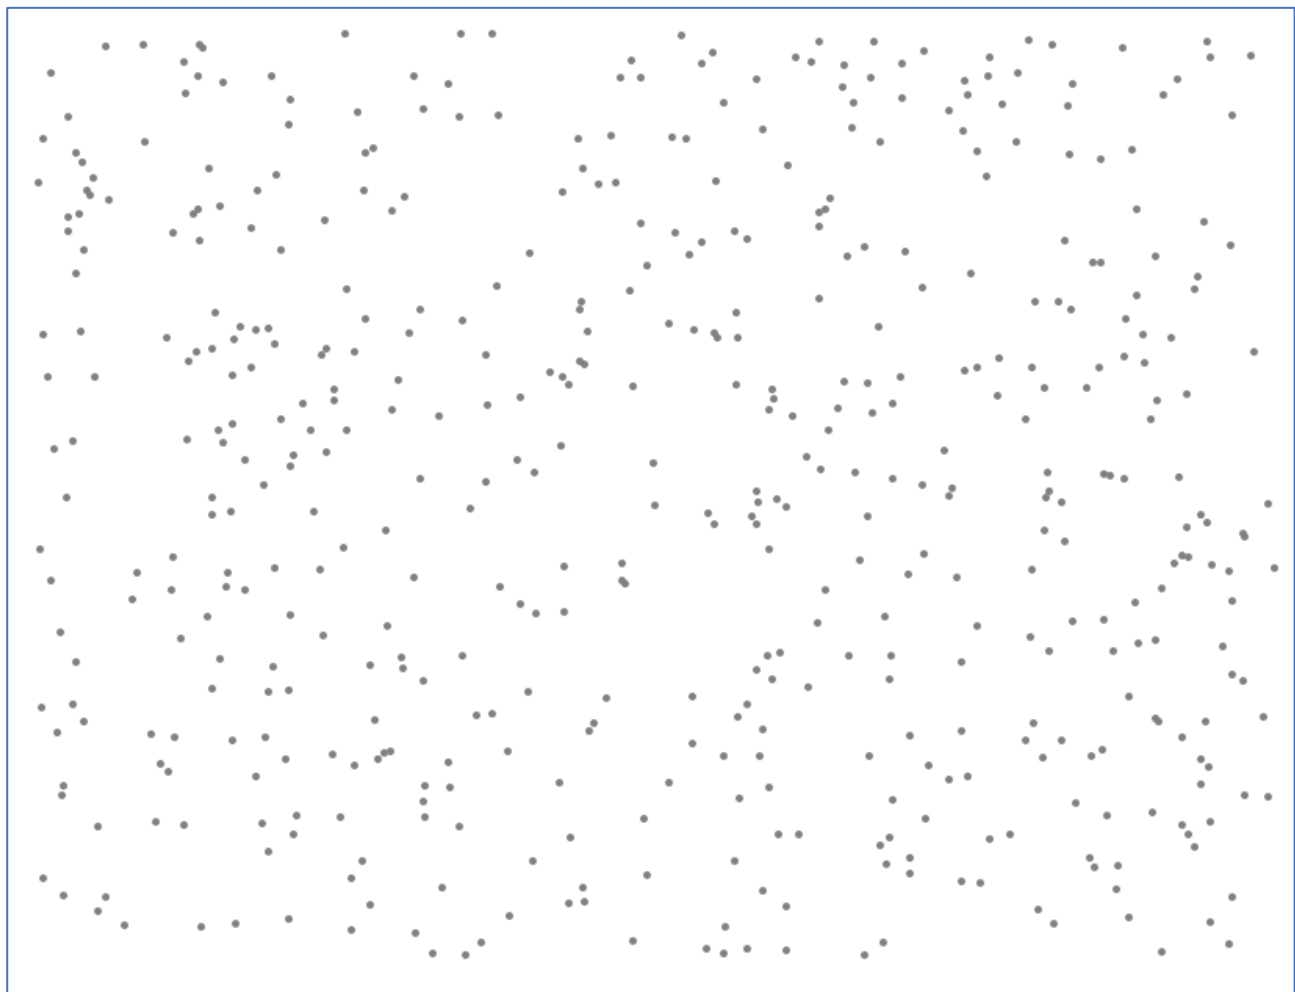

Figure 52 – The disordered arrangement based on the uniform distribution of nanoparticles

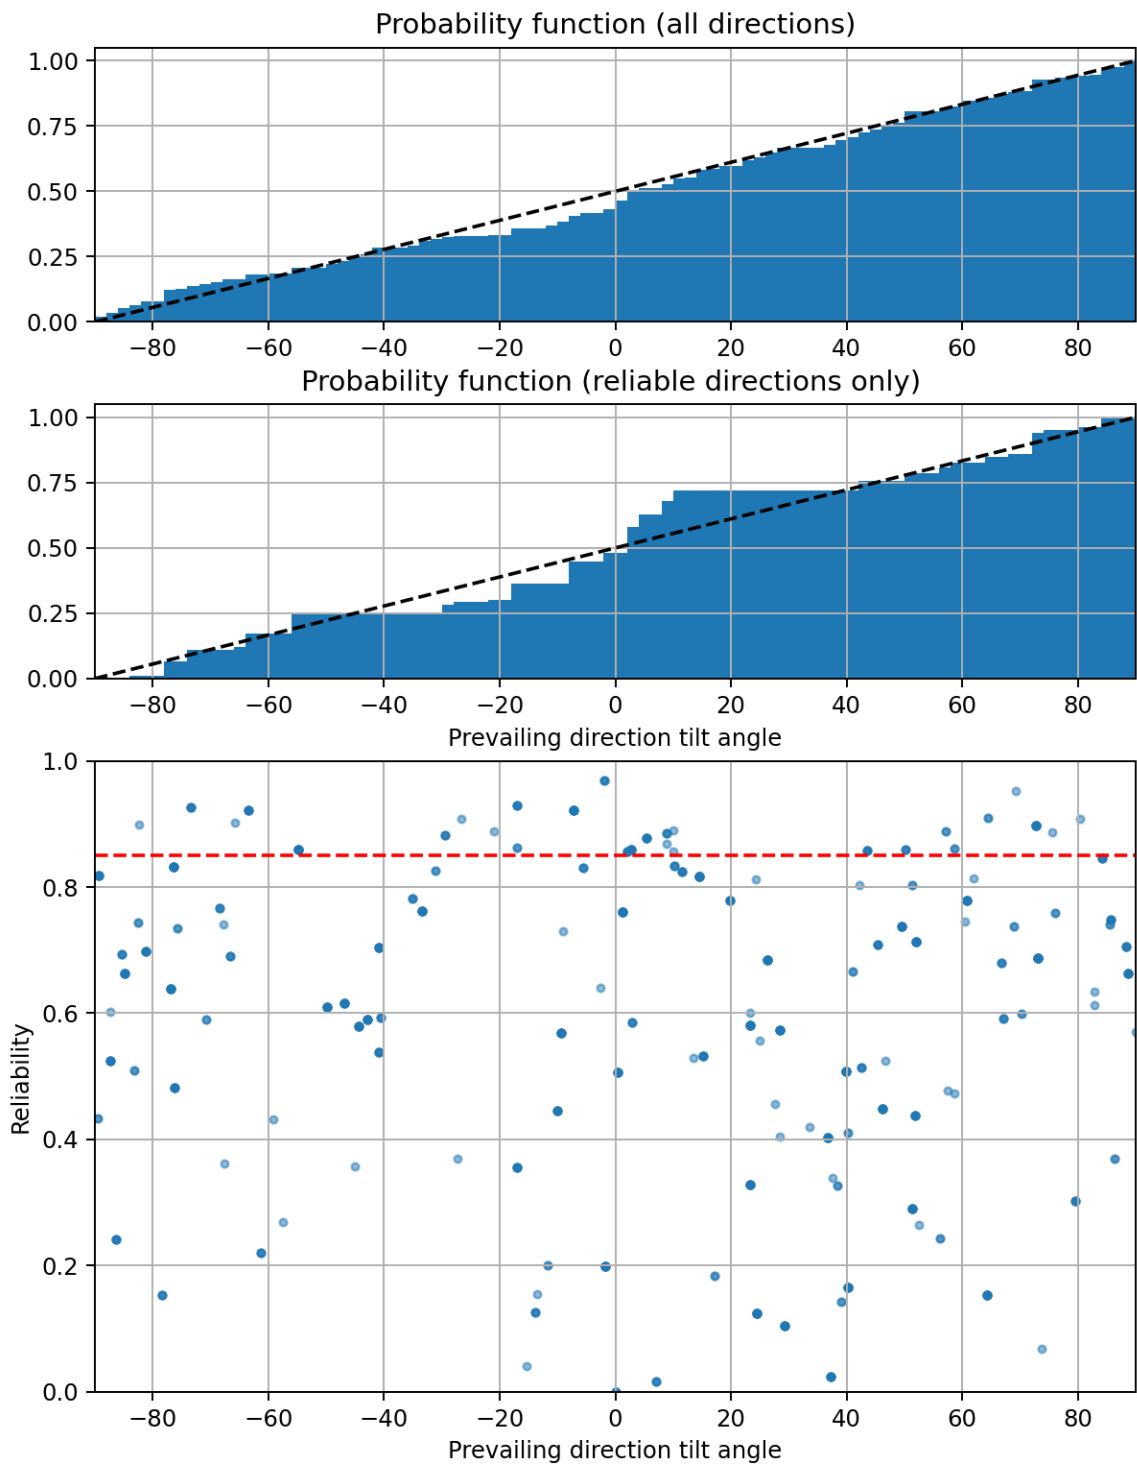

Figure 53 – Distribution of the prevailing direction of the disordered arrangement based on the uniform distribution of nanoparticles



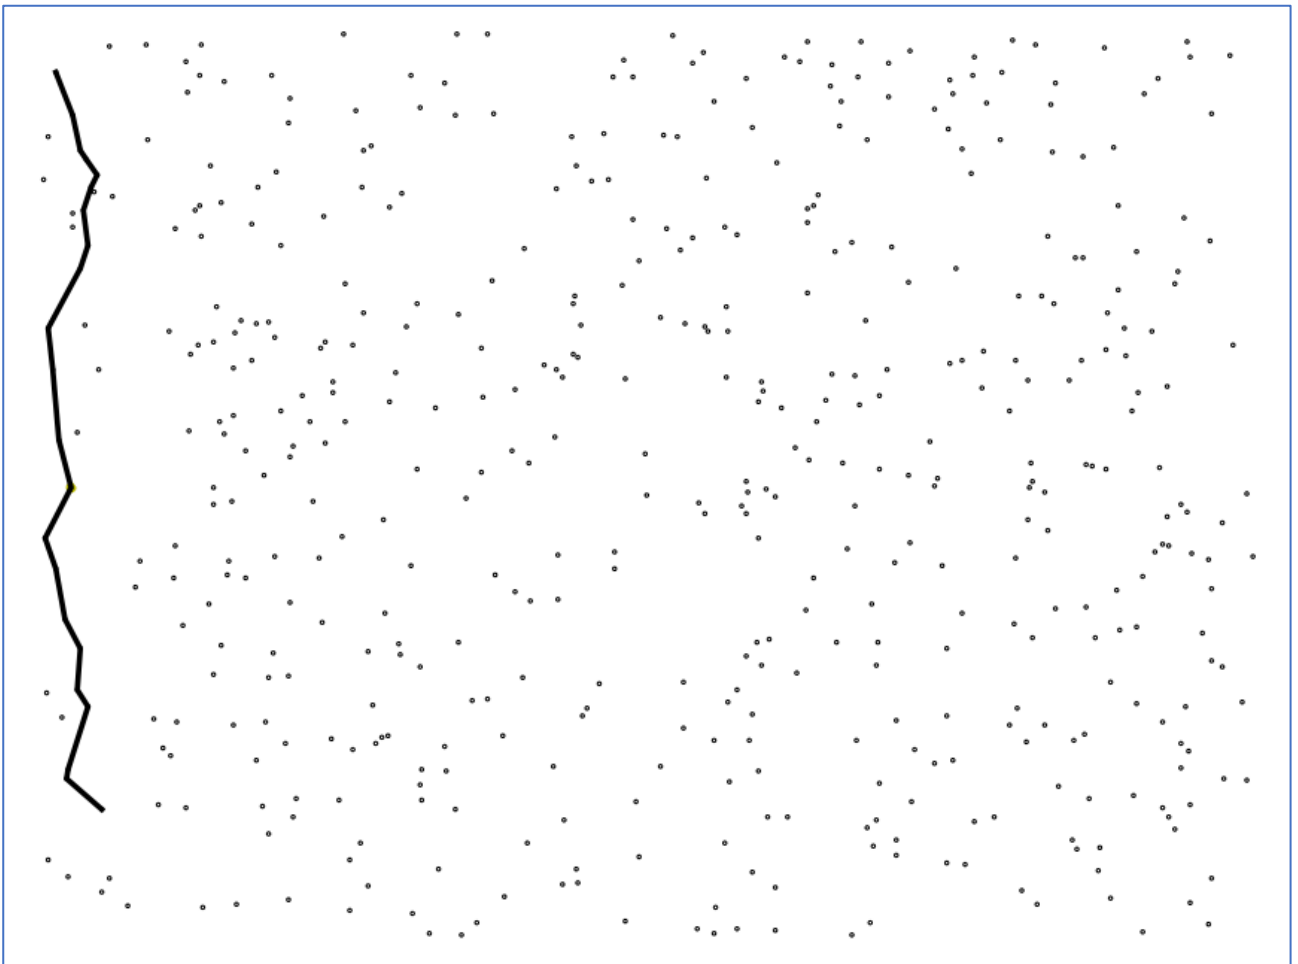

Figure 54 – Results of constructing lines with a disordered arrangement based on a uniform distribution of nanoparticles

4) **The disordered arrangement based on the uniform distribution of a small number of nanoparticles** (Figure 55). This case is a special case of the previous one, when there are few nanoparticles in the image (for example, due to the large magnification of the microscope). Then, the adaptive line break threshold will be large enough (section 4.4.2) for the corresponding density of nanoparticles (section 4.3.1). Thus, more nanoparticles will be combined into a line, but such lines will only be short (in terms of the nanoparticles number) and curved (Figure 56).

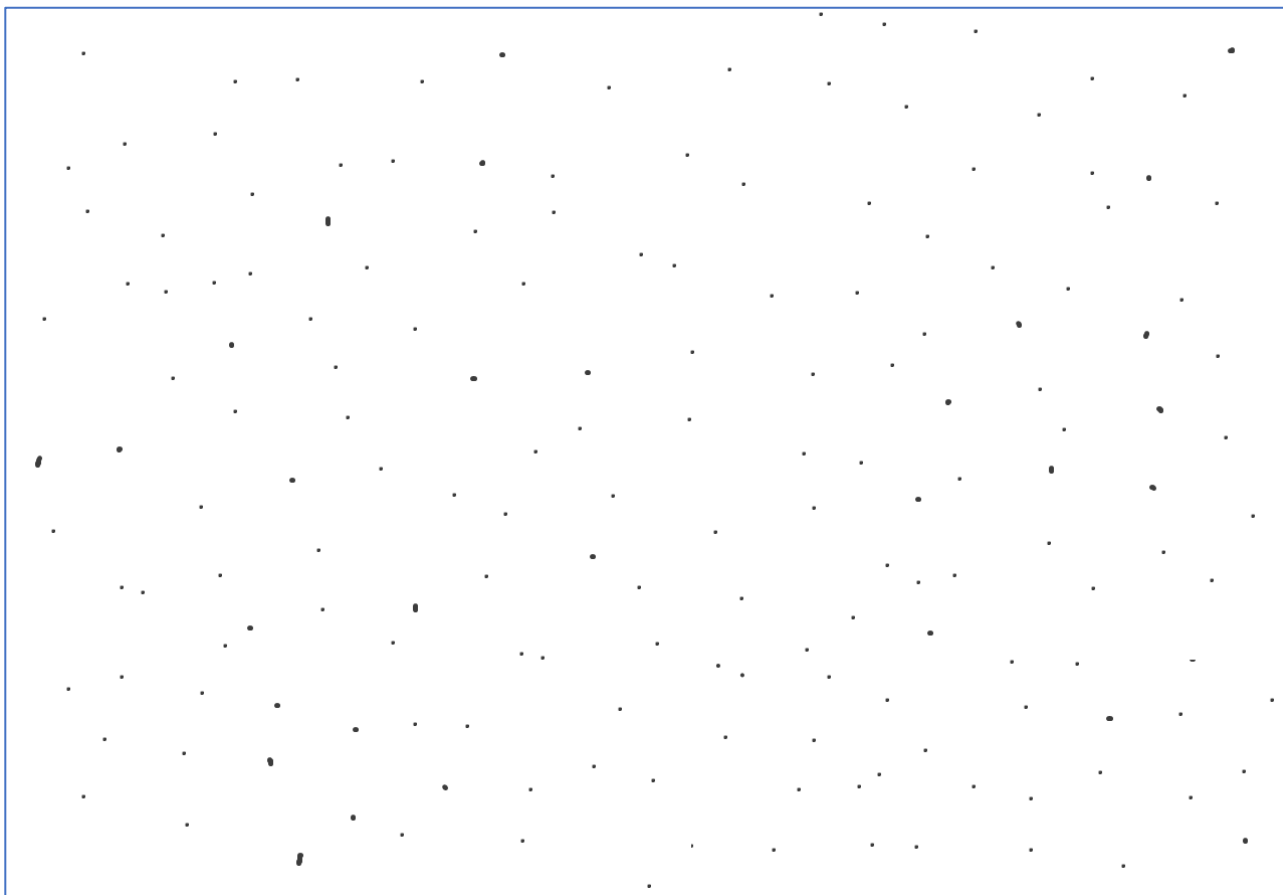

Figure 55 – The disordered arrangement based on the uniform distribution of a small number of nanoparticles

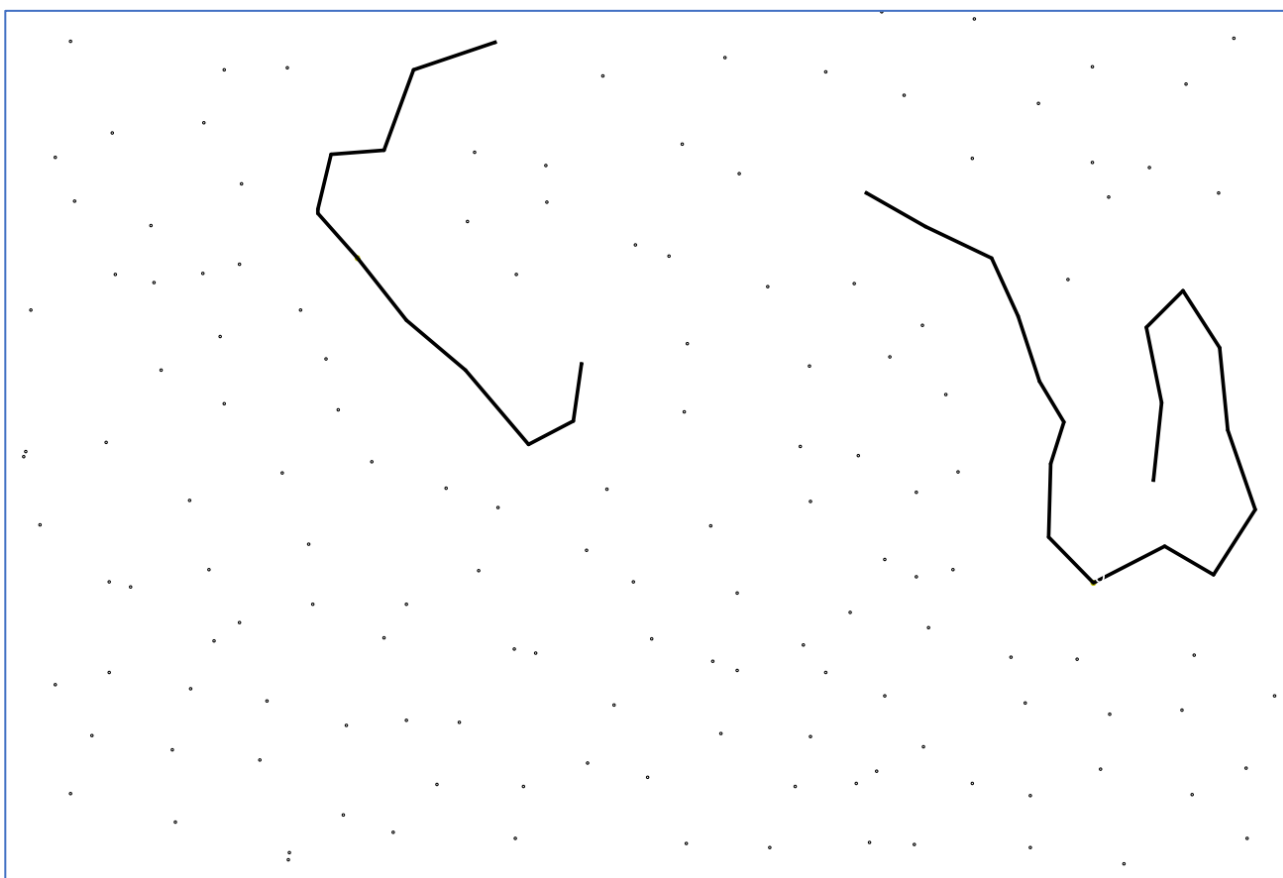

Figure 56 – Results of constructing lines with a disordered arrangement based on the uniform distribution of a small number of nanoparticles

According to the proposed approach, these synthetic images can be represented in the space of the proposed ordering features (O2, O3, and L4) together with real SEM images from the dataset (Figure 57). To process real SEM images and synthetic examples, the same parameter values of the proposed approach were used, as indicated in the article (section 4.5).

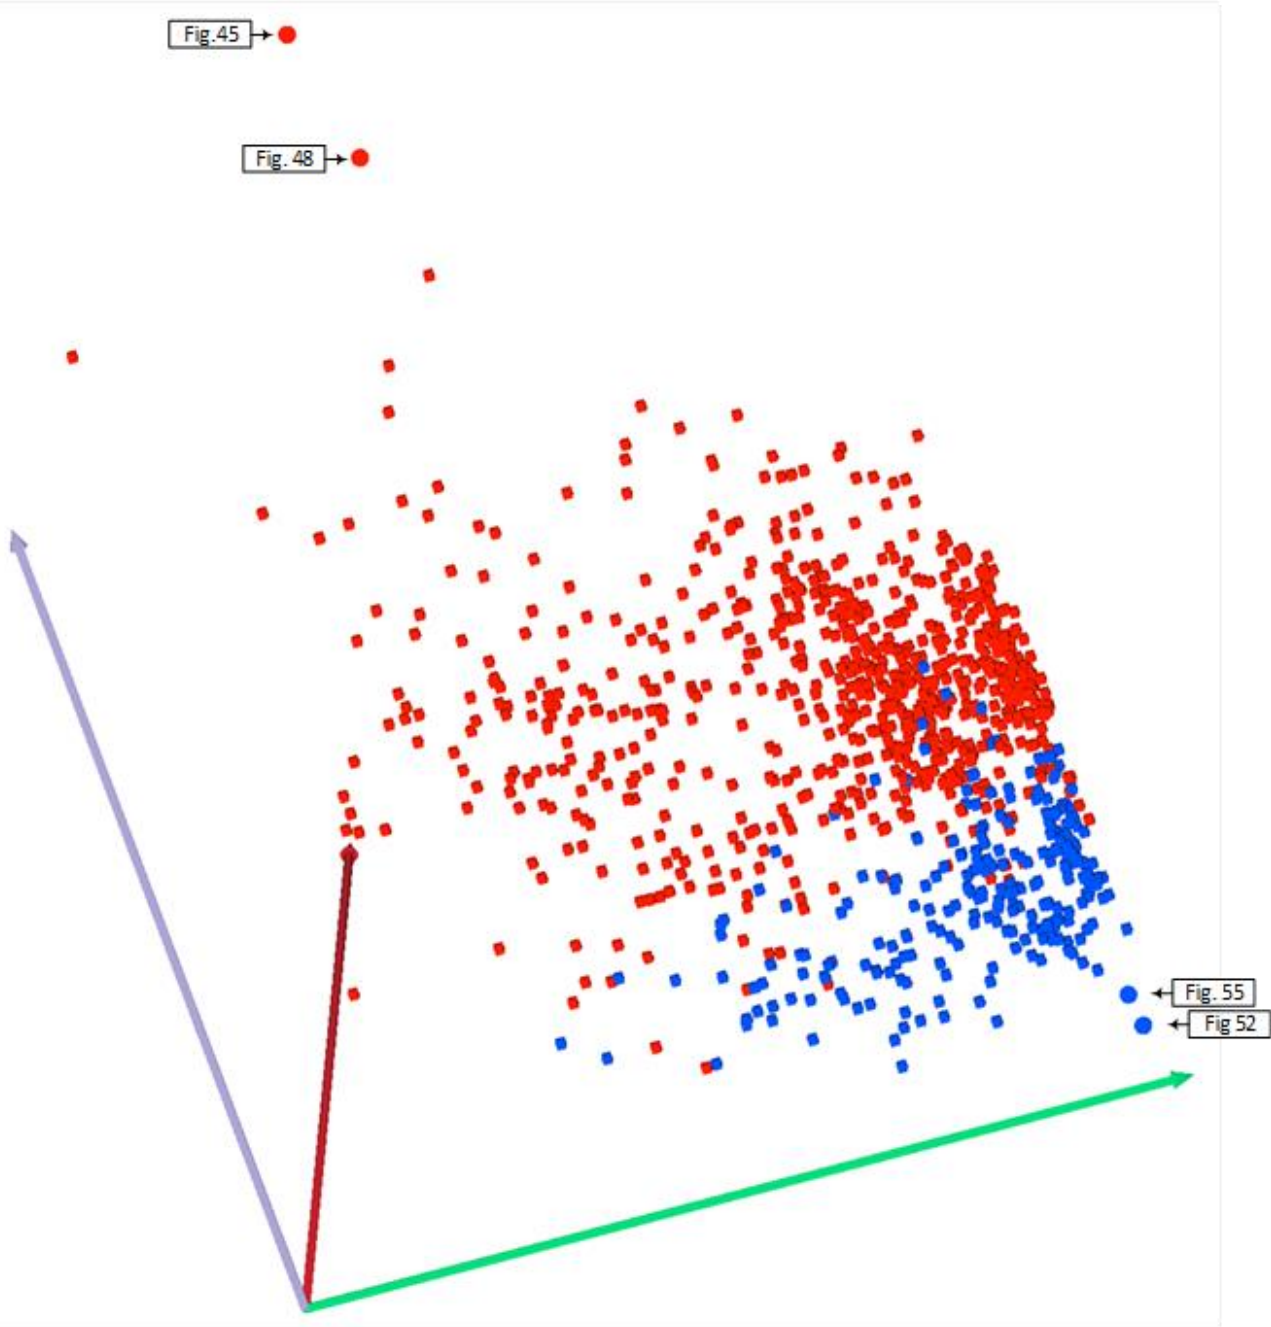

Figure 57 – Synthetic images together with real SEM images in the space of the three most informative features (O2, O3, and L4). The order is red, and the disorder is blue

## 5. Visual representation of separable objects in an explicable features system

Figure 58 shows the separability of the SEM images in the space of the proposed ordering features (O2, O3, and L4) for the linear SVM.

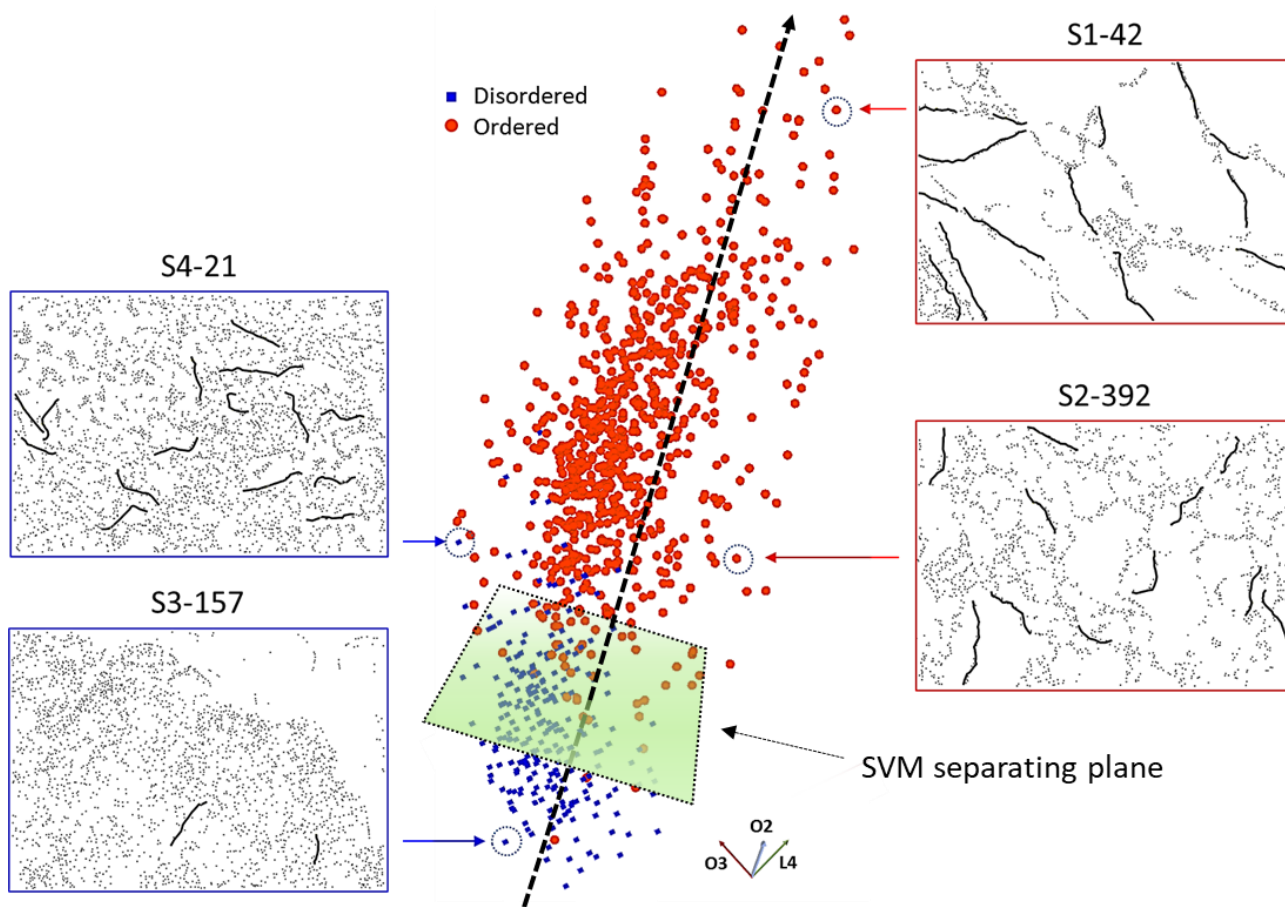

Figure 58 – Visual representation of separable objects in an explainable feature system for a linear SVM

## 6. The effect of orderliness on the reaction course

To demonstrate the effect of ordering on the course of chemical reactions, a set of SEM images was obtained before and after the reaction. Figures 59-60 show the corresponding images. The proposed approach was applied to each of these images, and its results are presented in Figures 61-70. The proposed ordering signs are also calculated, and their values are presented in Table 2.

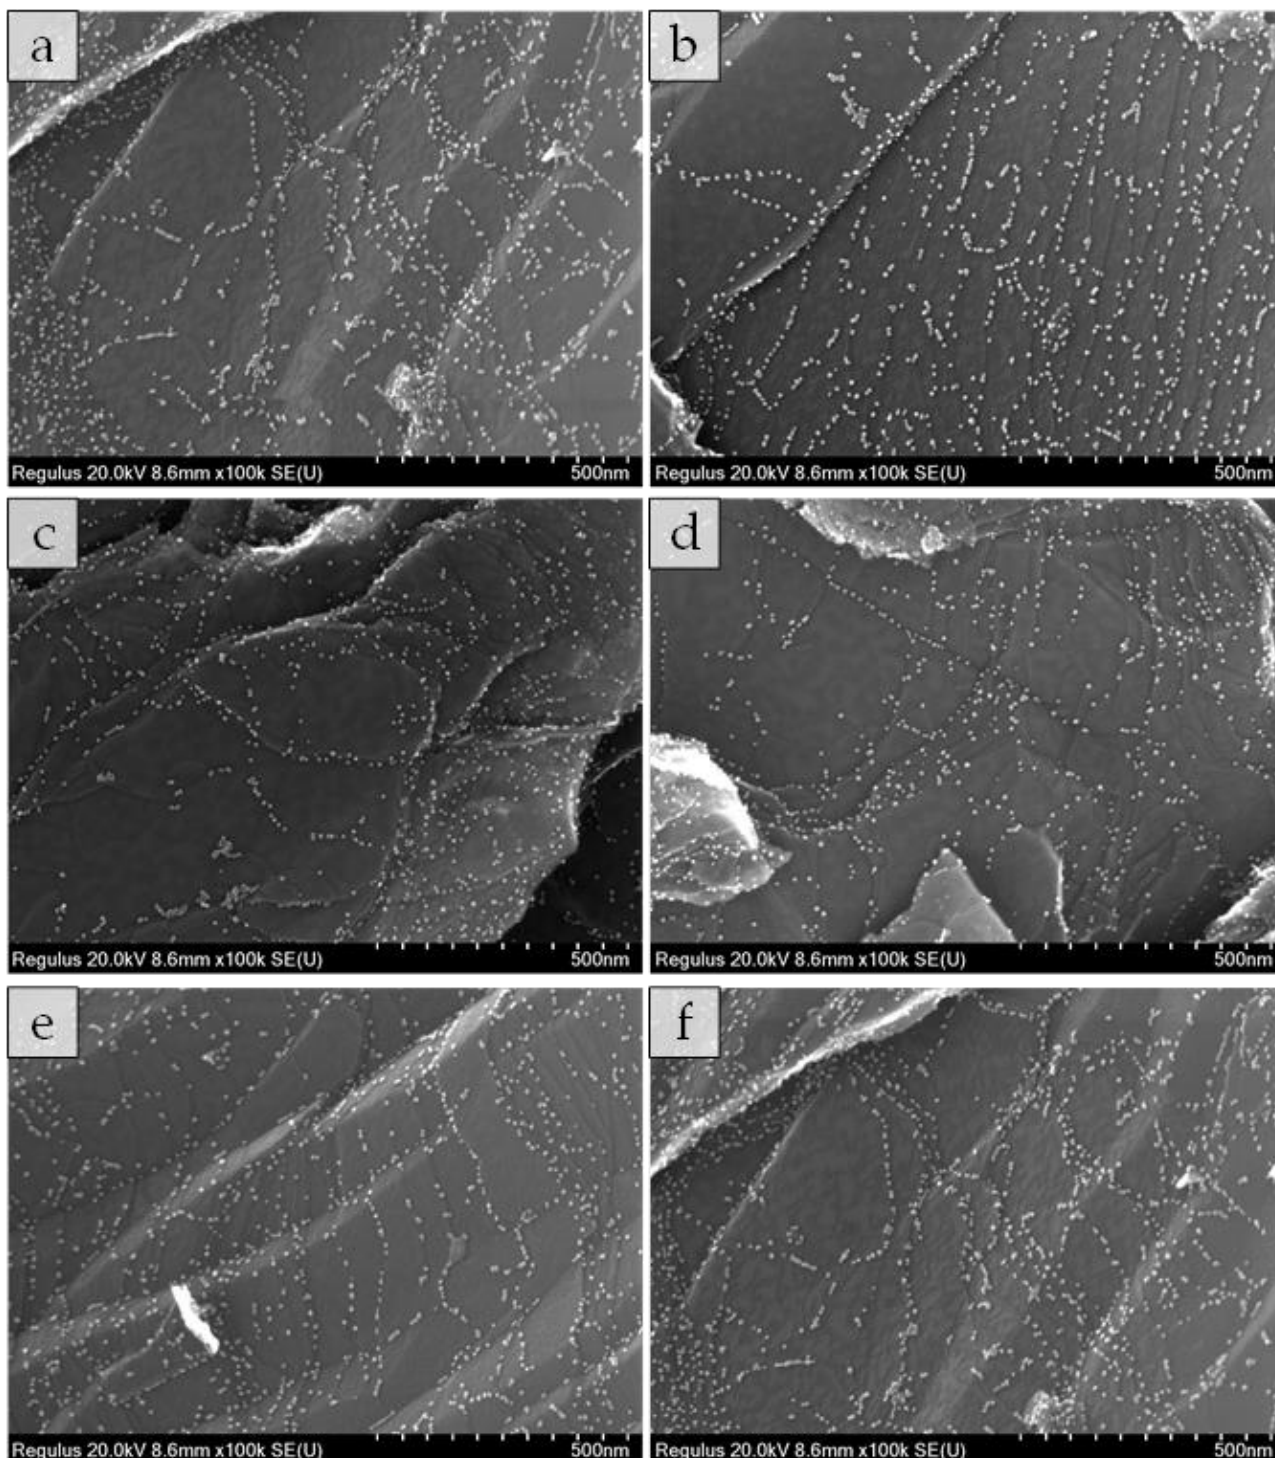

Figure 59 – SEM image before the reaction



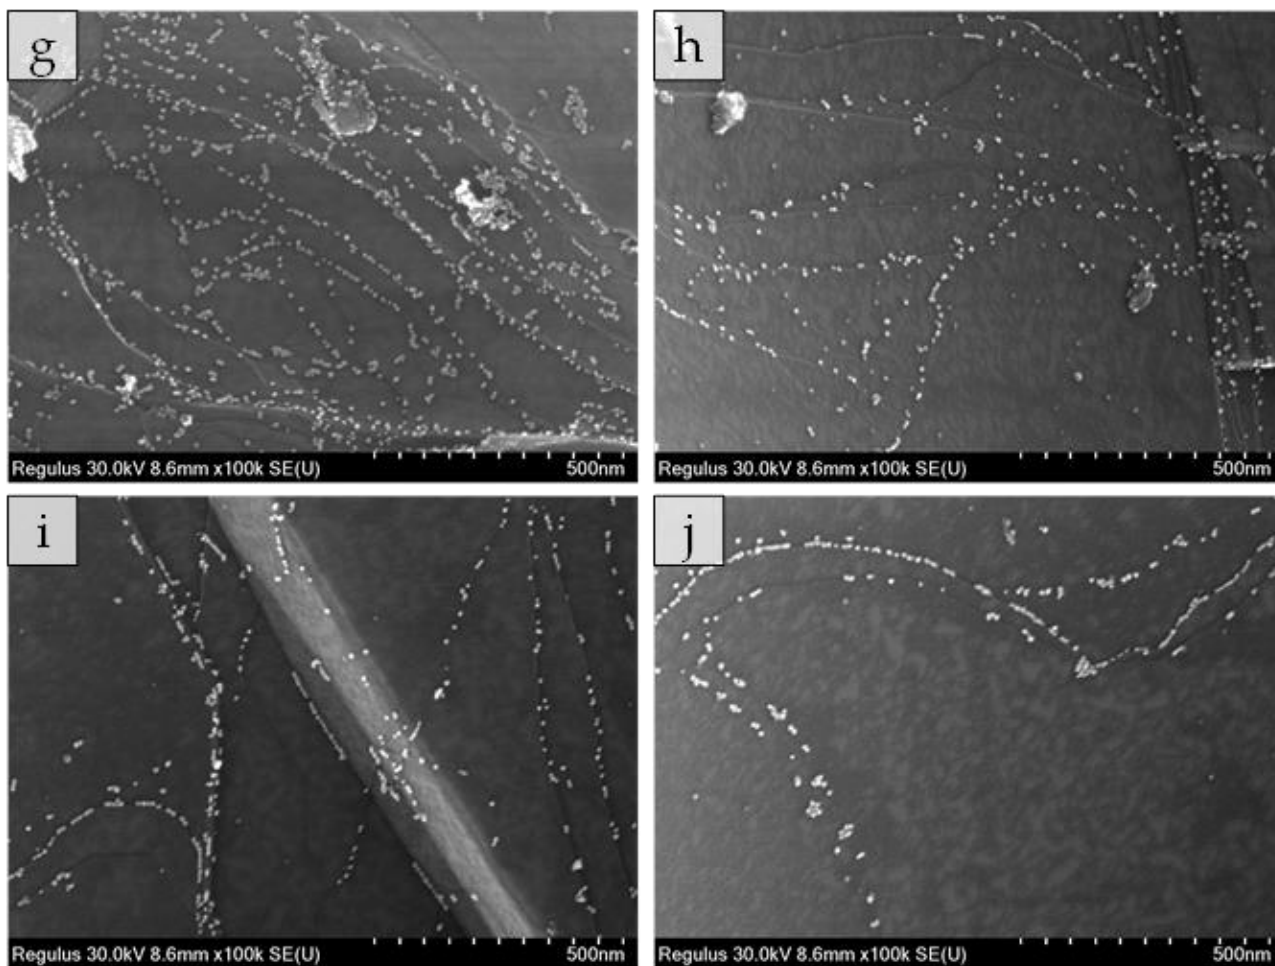

Figure 60 – SEM image after the reaction

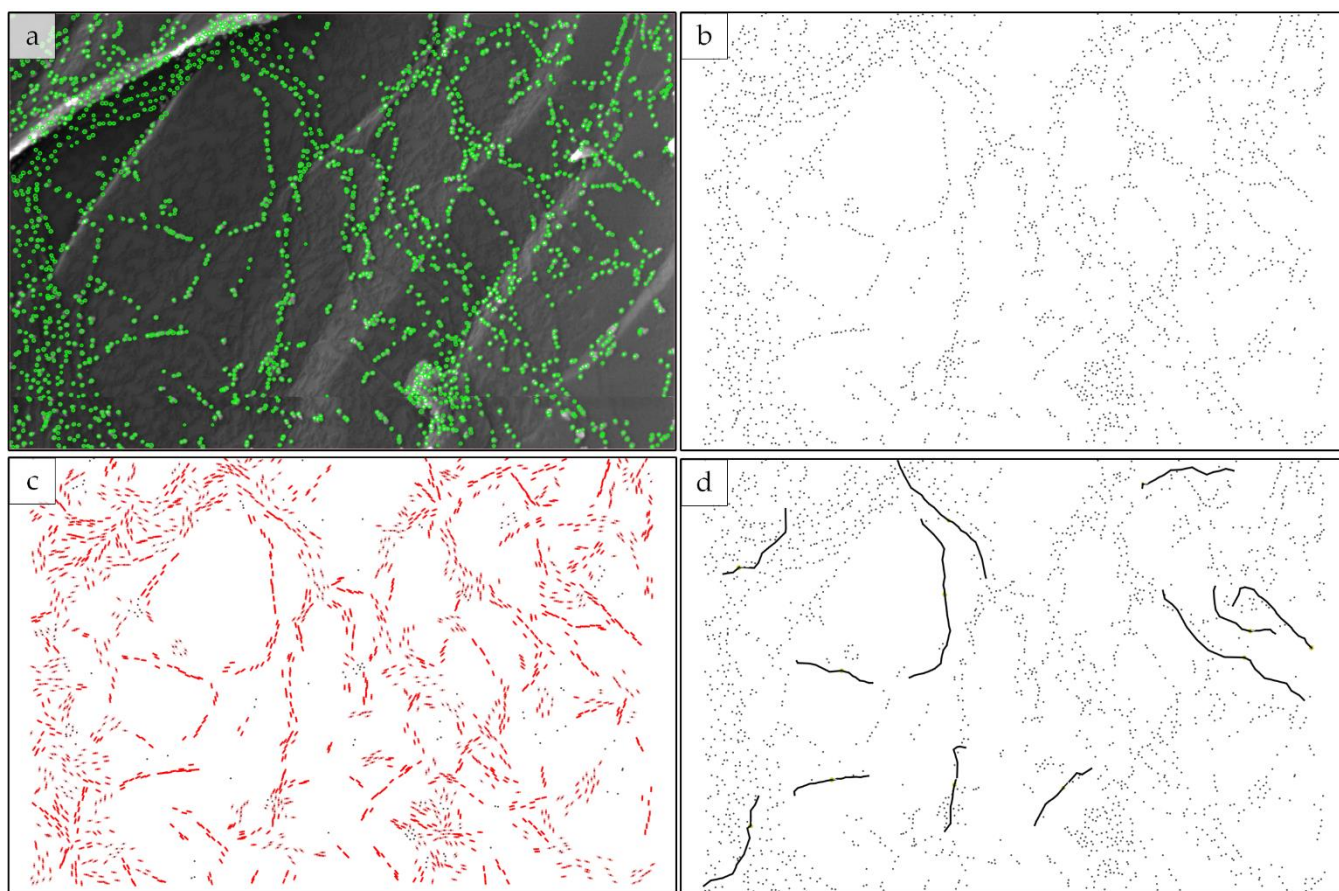

Figure 61 – Results of image processing for Figure 59a: a) detection of nanoparticles; b) location of particles without a substrate; c) prevailing directions; d) constructed lines



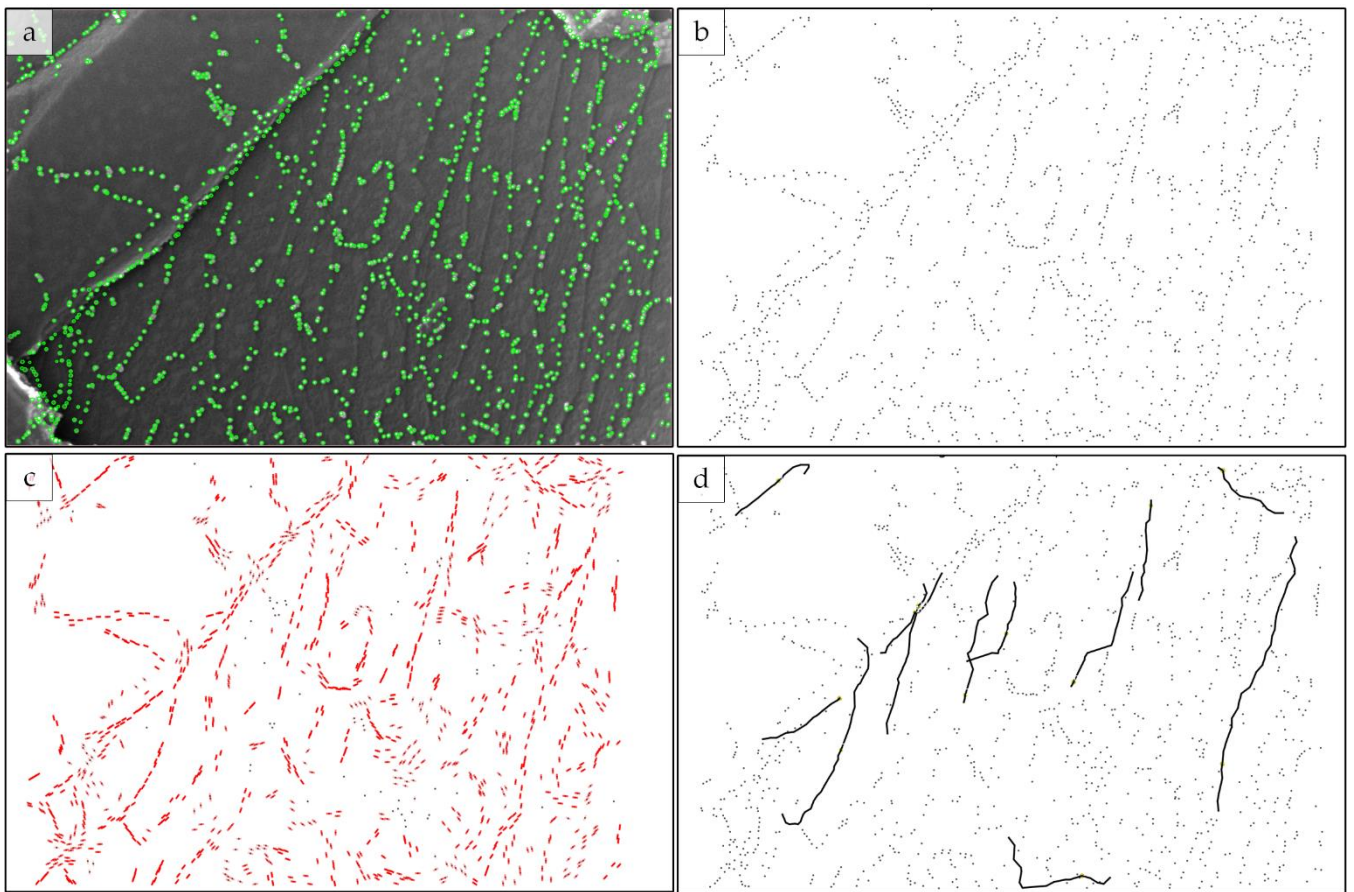

Figure 62 – Results of image processing for Figure 59b: a) detection of nanoparticles; b) location of particles without a substrate; c) prevailing directions; d) constructed lines

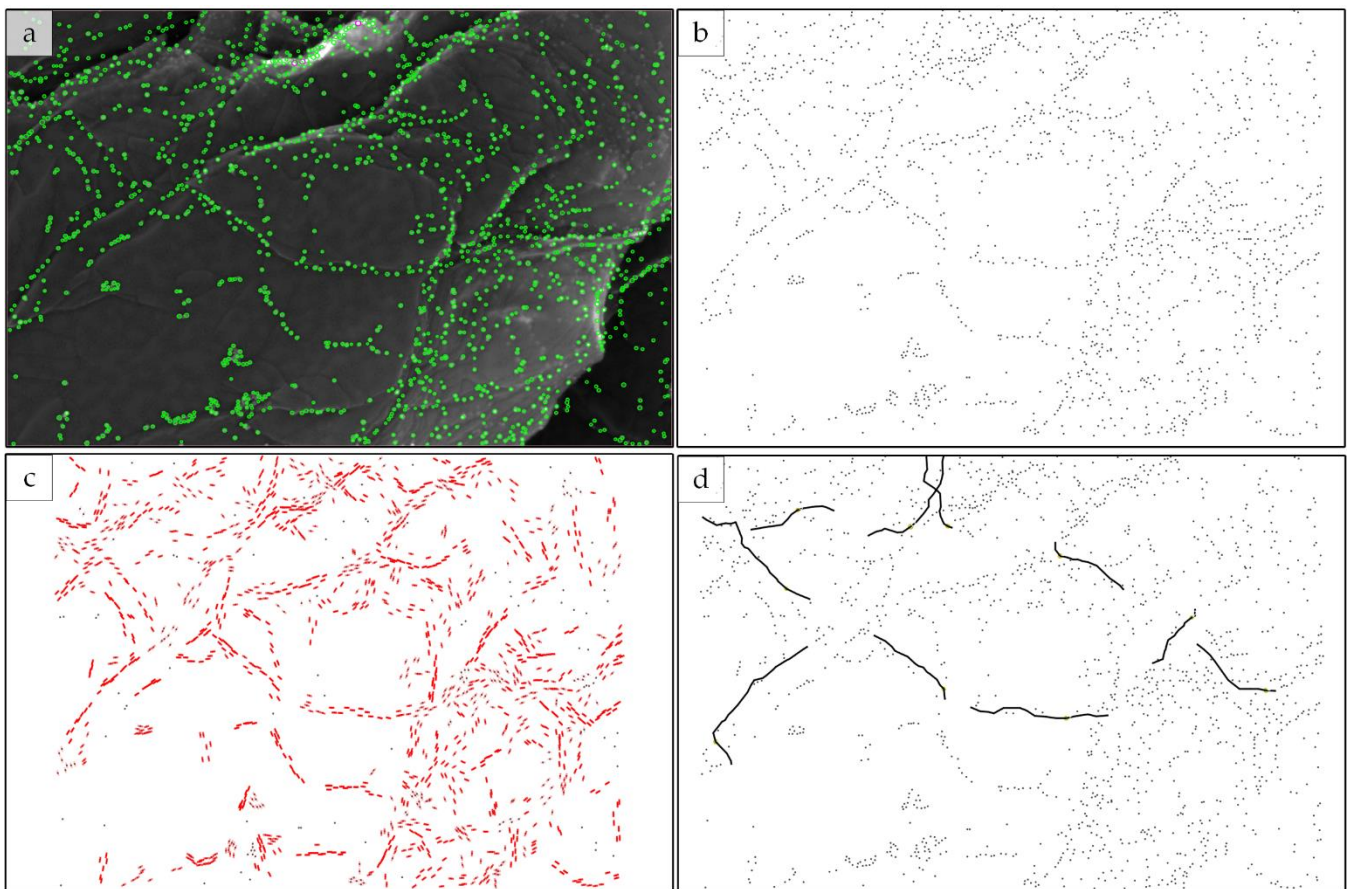

Figure 63 – Results of image processing for Figure 59c: a) detection of nanoparticles; b) location of particles without a substrate; c) prevailing directions; d) constructed lines



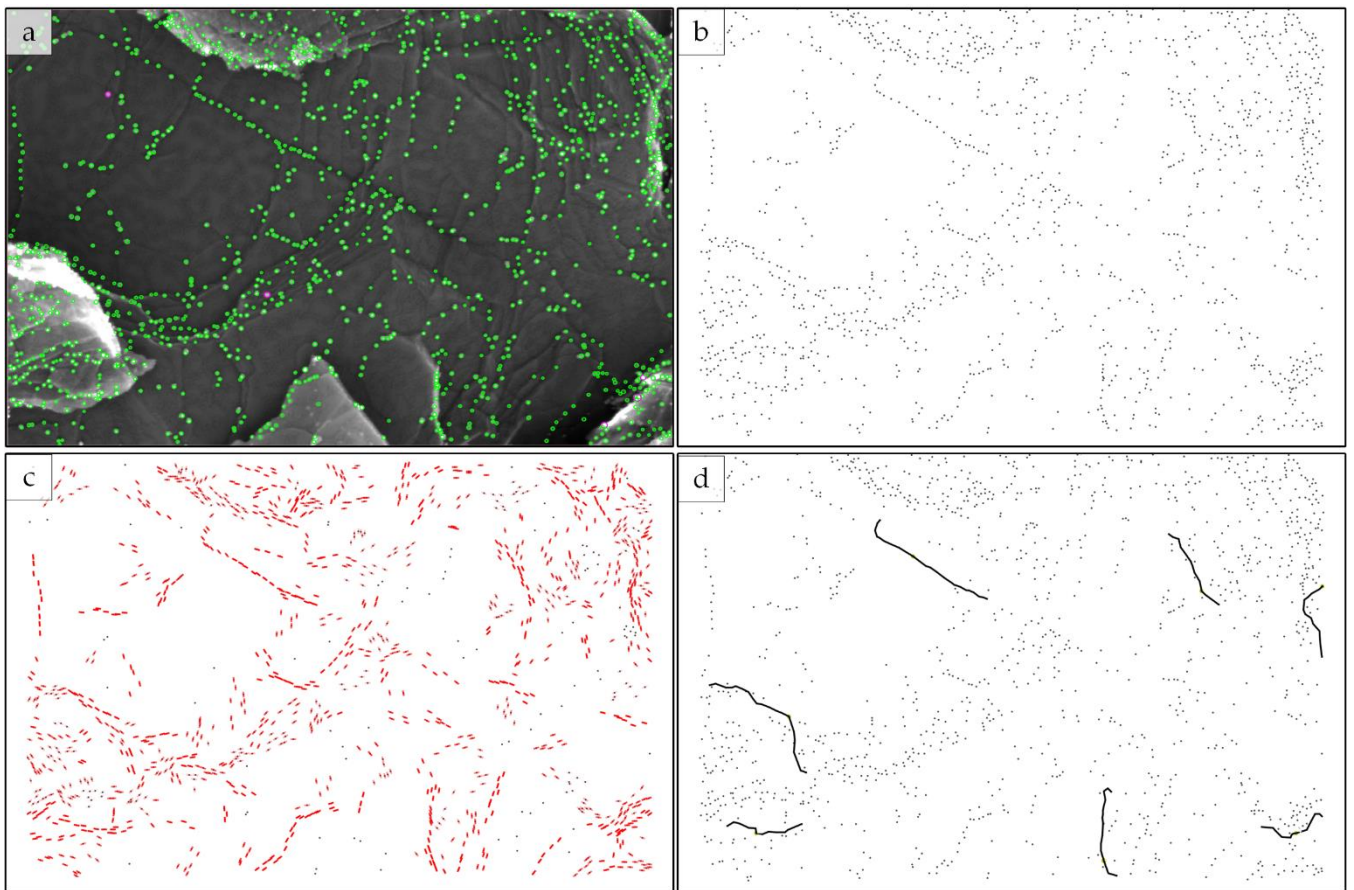

Figure 64 – Results of image processing for Figure 59d: a) detection of nanoparticles; b) location of particles without a substrate; c) prevailing directions; d) constructed lines

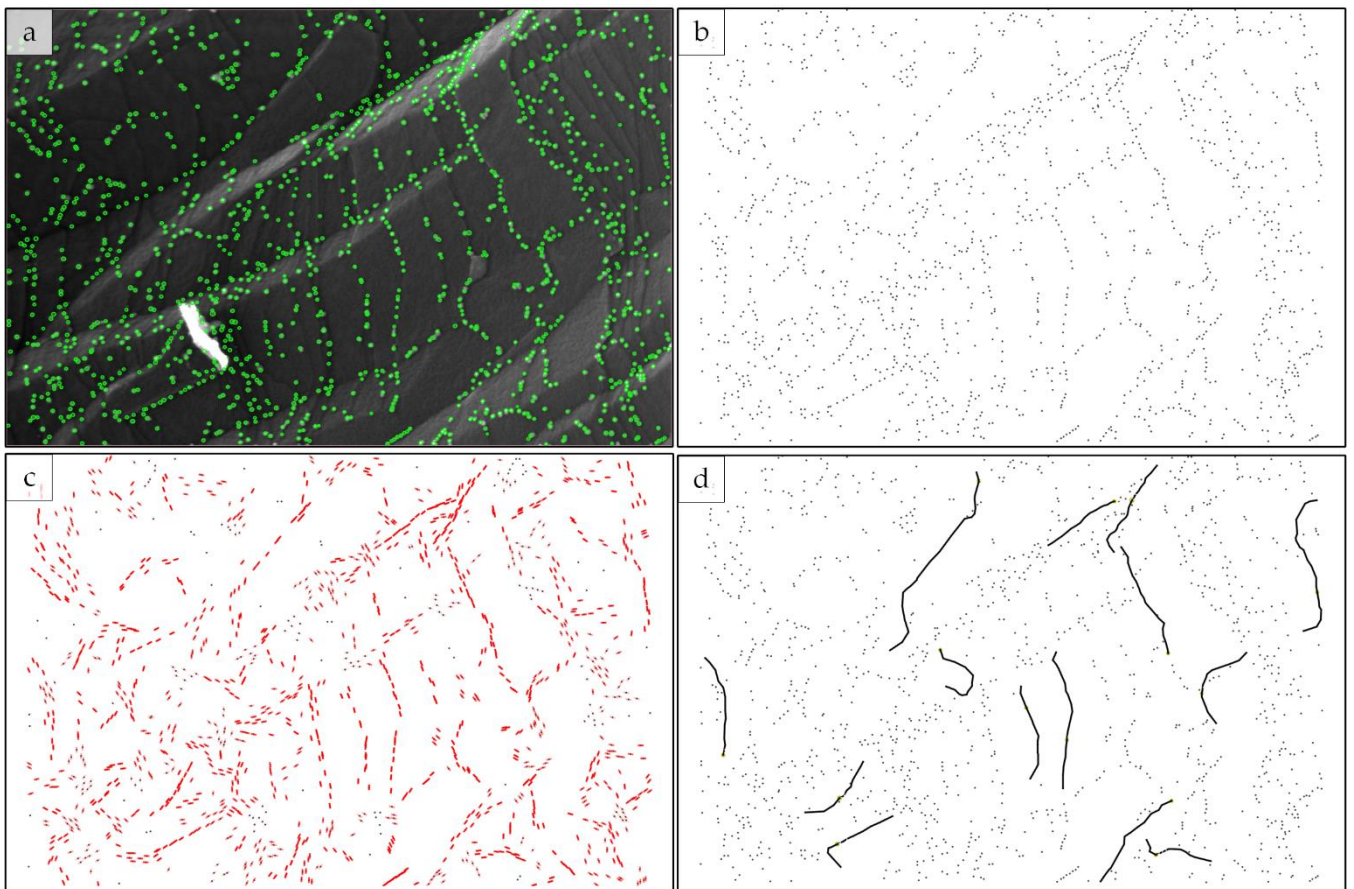

Figure 65 – Results of image processing for Figure 59e: a) detection of nanoparticles; b) location of particles without a substrate; c) prevailing directions; d) constructed lines



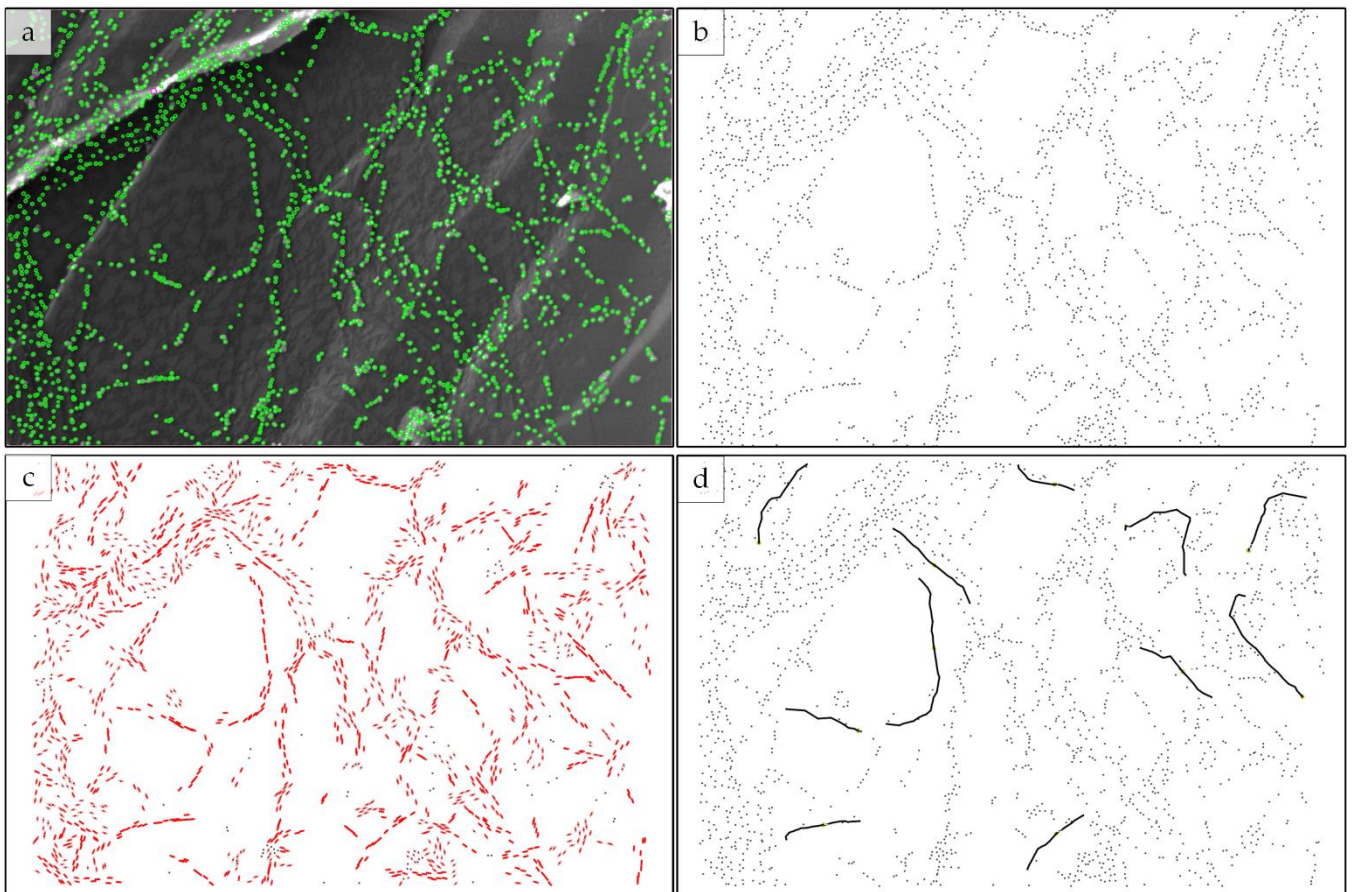

Figure 66 – Results of image processing for Figure 59f: a) detection of nanoparticles; b) location of particles without a substrate; c) prevailing directions; d) constructed lines

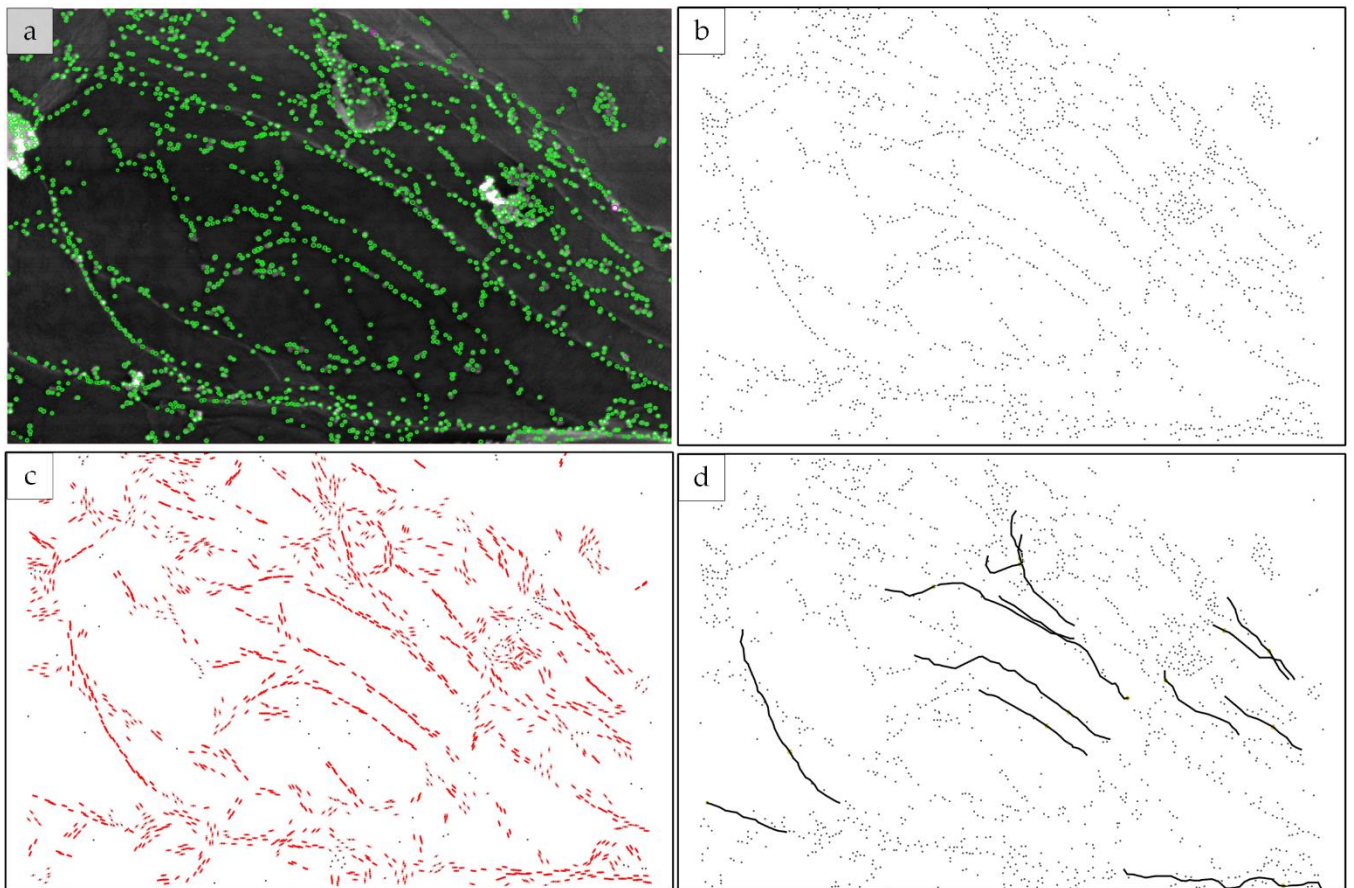

Figure 67 – Results of image processing for Figure 60g: a) detection of nanoparticles; b) location of particles without a substrate; c) prevailing directions; d) constructed lines

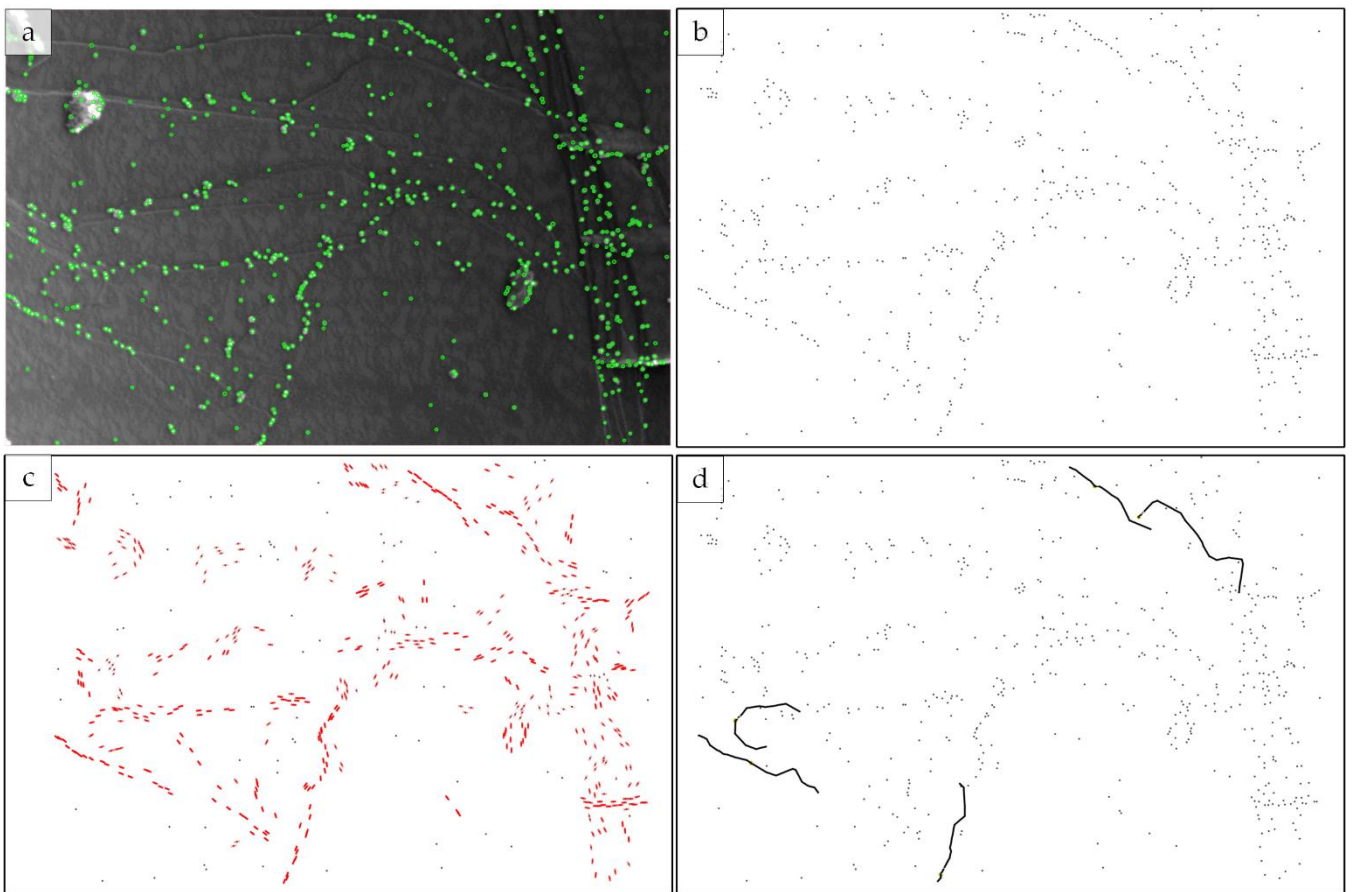

Figure 68 – Results of image processing for Figure 60h: a) detection of nanoparticles; b) location of particles without a substrate; c) prevailing directions; d) constructed lines

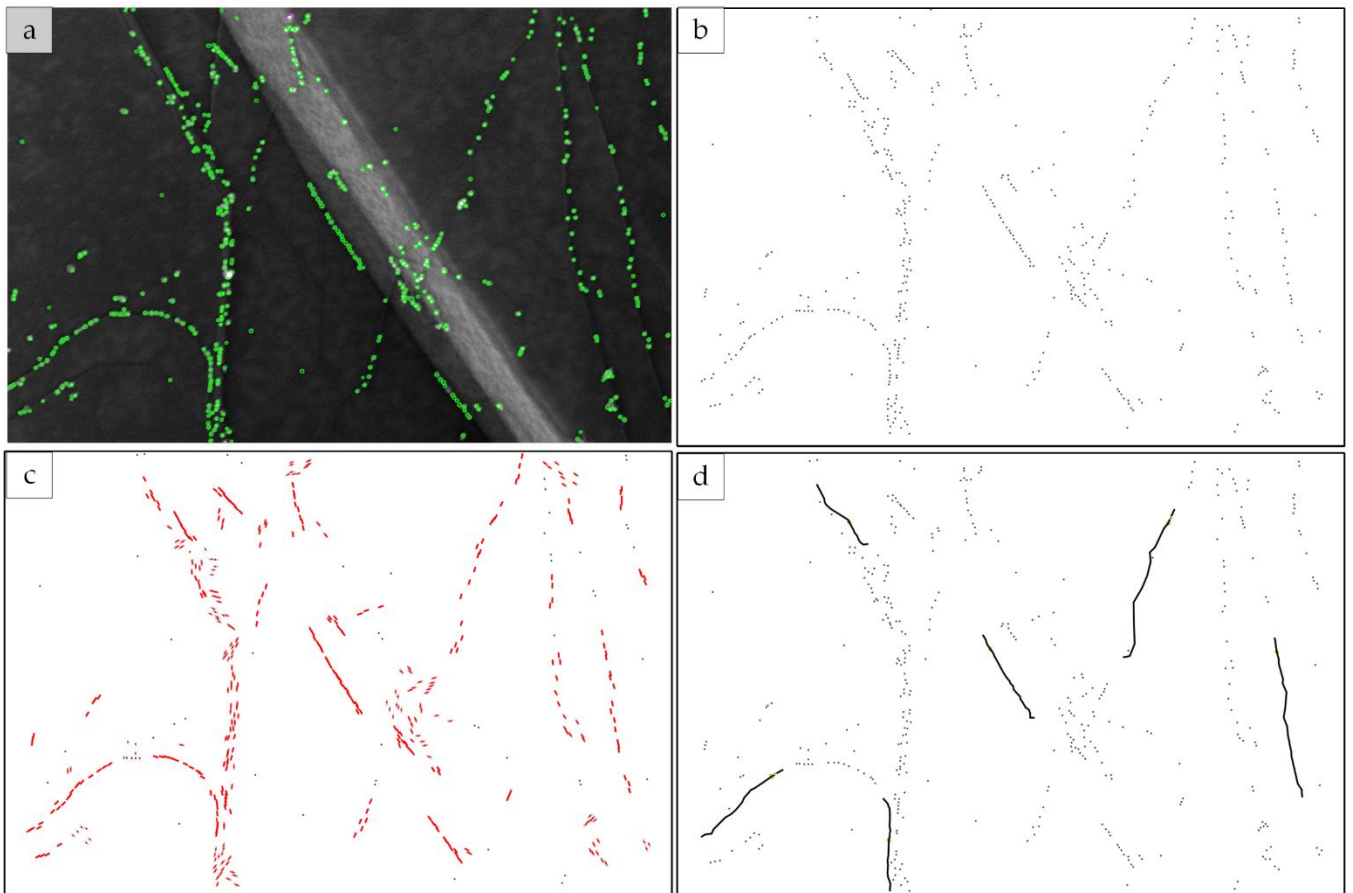

Figure 69 – Results of image processing for Figure 60i: a) detection of nanoparticles; b) location of particles without a substrate; c) prevailing directions; d) constructed lines



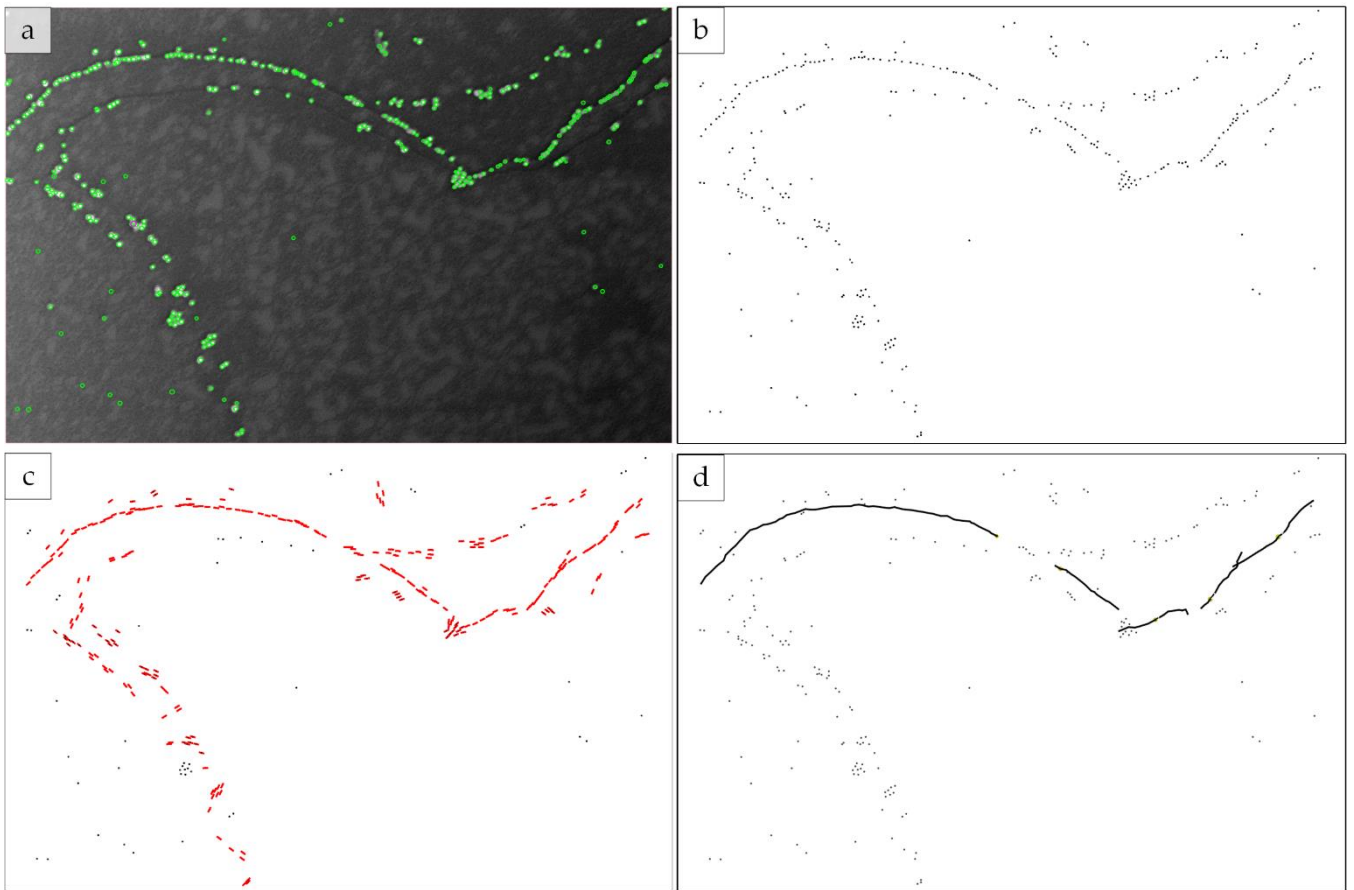

Figure 70 – Results of image processing for Figure 60j: a) detection of nanoparticles; b) location of particles without a substrate; c) prevailing directions; d) constructed lines

**Table 2** – Calculated values of the proposed features for the new SEM image

| Image           | O1     | O2     | O3     | L1 | L2     | L3     | L4     |
|-----------------|--------|--------|--------|----|--------|--------|--------|
| <b>Fig. 58a</b> | 0.3975 | 0.9752 | 0.8607 | 14 | 0.9579 | 0.9027 | 0.1114 |
| <b>Fig. 58b</b> | 0.4157 | 0.9674 | 0.8447 | 16 | 0.9538 | 0.8697 | 0.1242 |
| <b>Fig. 58c</b> | 0.4837 | 0.9583 | 0.8357 | 11 | 0.9540 | 0.9172 | 0.1014 |
| <b>Fig. 58d</b> | 0.3764 | 0.9562 | 0.8151 | 5  | 0.9652 | 0.9254 | 0.0560 |
| <b>Fig. 58e</b> | 0.4521 | 0.9458 | 0.8164 | 14 | 0.9476 | 0.8499 | 0.1646 |
| <b>Fig. 58f</b> | 0.4678 | 0.9479 | 0.7964 | 9  | 0.9563 | 0.9153 | 0.1375 |
| <b>Fig. 59g</b> | 0.4206 | 0.9300 | 0.7820 | 13 | 0.9652 | 0.9221 | 0.1635 |
| <b>Fig. 59h</b> | 0.4169 | 0.8823 | 0.6754 | 5  | 0.9161 | 0.7956 | 0.1252 |
| <b>Fig. 59i</b> | 0.6802 | 0.8495 | 0.5876 | 6  | 0.9785 | 0.9653 | 0.2146 |
| <b>Fig. 59j</b> | 0.6991 | 0.8066 | 0.5580 | 5  | 0.9836 | 0.9373 | 0.3500 |
